# Supplementary material
Source: PubMed Central journal article supplement (PMC10337120)
Supplement: NIHMS1911543-supplement-1.pdf [file NIHMS1911543-supplement-1.pdf]

## Supplementary Figure Legends

**Supplementary Figure 1. Levels of fluoxetine in maternal serum.** **A**, Mass spectrometry dose-response of 100nM, 1µM, and 10µM fluoxetine in maternal serum, maternal sera of SPF+ Veh, ABX + Veh, SPF+ FLX, ABX + FLX groups at E14.5. **B**, Concentration of fluoxetine in maternal serum of SPF + Veh, SPF + FLX, ABX + Veh and ABX + FLX groups (one-way ANOVA with Tukey's, n = 6, 6, 6, 6, respectively). n.s.: not significant, \*\*\*\* p < 0.0001

**Supplementary Figure 2. Effects of maternal fluoxetine treatment with microbiome depletion on maternal weight, litter size, embryo size and brain volume.** **A**, Maternal weight of SPF + Veh, SPF + FLX, ABX + Veh and ABX + FLX groups on gestational day 0.5, 7.5, and 14.5 (One-way ANOVA with Tukey's, n = 6, 6, 6, 6, respectively). **B**, Change in maternal weight of SPF+ Veh, SPF + FLX, ABX + Veh and ABX + FLX groups from gestational day 0.5 to 7.5. (one-way ANOVA with Tukey's, n = 6, 6, 6, 6 respectively). **C**, Change in maternal weight of SPF+ Veh, SPF + FLX, ABX + Veh and ABX + FLX groups from gestational day 7.5 to 14.5. (one way ANOVA with Tukey's, n = 6, 6, 6, 6 respectively). **D**, Maternal cecal weight of SPF+ Veh, SPF + FLX, ABX + Veh and ABX + FLX at E14.5. (one-way ANOVA with Tukey's, n = 6, 6, 6, 6 respectively). **E**, Number of pups born to dams of SPF + Veh, SPF + FLX, ABX + Veh and ABX + FLX. (one way ANOVA with Tukey's, n = 6, 6, 6, 6 respectively). **F**, Volume of SPF+ Veh, SPF + FLX, ABX + Veh and ABX + FLX embryos at E14.5. (one-way ANOVA with Tukey's, n = 6, 6, 6, 6 respectively) **G**, Volume of SPF+ Veh, SPF + FLX, ABX + Veh and ABX + FLX embryonic brain at E14.5. (one-way ANOVA with Tukey's, n = 6, 6, 6, 6 respectively) **H**, Representative coronal and sagittal microcomputed tomography images of SPF+ Veh, SPF + FLX, ABX + Veh and ABX + FLX embryos at E14.5. (One-way ANOVA with Tukey's, n = 6, 6, 6, 6 respectively). n.s.: not significant, \* p < 0.05, \*\*\*\* p < 0.0001

**Supplementary Figure 3. Maternal fluoxetine treatment alters fetal brain molecular function and cellular component pathways.** **A and B**, Top 10 molecular function (MF) and cellular component (CC) gene ontology (GO) terms enrichment analysis of genes upregulated (**A**) and downregulated (**B**) in E14.5 fetal brain from SPF+FLX compared to SPF+Veh dams.

**Supplementary Figure 4. Effects of maternal fluoxetine treatment on maternal and fetal brain serotonin and tryptophan levels.**

**A, B**, Serum levels of serotonin (5-HT) (**A**) and tryptophan (**B**) in gestational day 14.5 murine dams that were conventionally colonized with vehicle (SPF + Veh) or fluoxetine (SPF + FLX) gavage and antibiotic treated with vehicle (ABX + Veh) or fluoxetine (ABX + FLX) gavage. (one-way ANOVA with Tukey's, n = 8, 10, 6, 10 dams, respectively) **C, D**, Fetal brain levels of 5-HT (one-way ANOVA with Tukey's, n=8) (**C**) and tryptophan (**D**) on gestational day E14.5 (one-way ANOVA with Tukey's, n = 4). n.s.: not significant, \* p < 0.05

**Supplemental Figure 5. Gestational fluoxetine exposure has no significant effect on the fetal brain serotonergic system.** Representative images of SPF + Veh, SPF + FLX, and ABX + FLX sagittal sections showing 5-HT (**A**), SERT (**B**), Tph2 (**C**), and overlay (**D**) staining for cells in the dorsal raphe nucleus (DRN). Quantification of colocalized 5-HT+ & SERT+ (**E**) and 5-HT+ &

Tph2+ (F) cells in the DRN of SPF + Veh, SPF + FLX, and ABX + FLX embryo brains (Two-tailed t-test, n = 8, 6, 5). G, The ratio of Tph2+ cells to SERT+ cells in DRN of SPF + Veh, SPF + FLX, and ABX + FLX embryo brains. (Two-tailed t-test, n = 8, 6, 5). Representative images of 5-HT (H), SERT (I), Tph2 (J), and overlay (K) axon projections from the DRN to the prefrontal cortex (PFC) in sagittal SPF + Veh, SPF + FLX, and ABX + FLX embryonic brain sections. L, (Left) Quantification of 5-HT integrated density in DRN to PFC axon projections in SPF + Veh, SPF + FLX, and ABX + FLX sagittal embryo brain sections (Welch's two-tailed t-test, n = 8, 6, 5). (Right) Quantification of number of 5-HT+ axons in SPF + Veh, SPF + FLX, and ABX + FLX sagittal embryo brain sections (Welch's two-tailed t-test, n = 8, 6, 5). M, (Left) Quantification of SERT integrated density in DRN to PFC axon projections in SPF + Veh, SPF + FLX, and ABX + FLX sagittal embryo brain sections (Welch's two-tailed t-test, n = 8, 6, 5). (Right) Quantification of SERT+ puncta in DRN to PFC axon projections in SPF + Veh, SPF + FLX, and ABX + FLX sagittal embryo brain sections (Welch's two-tailed t-test, n = 8, 6, 5). N, (Left) Quantification of Tph2 integrated density in DRN to PFC axon projections in SPF + Veh, SPF + FLX, and ABX + FLX sagittal embryo brain sections (Welch's two-tailed t-test, n = 8, 6, 5). (Right) Quantification of number of TPH2+ axons in SPF + Veh, SPF + FLX, and ABX + FLX sagittal embryo brain sections (Welch's two-tailed t-test, n = 8, 6, 5). Scale bar: 100  $\mu$ m. n.s.: not statistically significant

**Supplementary Figure 6. Maternal fluoxetine treatment has no overt effect on the composition of the maternal gut microbiota.** A, Alpha rarefaction plots of Shannon diversity of fecal samples from E3.5, E6.5, E8.5, E11.5, and E14.5 SPF+Veh and SPF+FLX dams. B, Weighted Unifrac PCoA plots of fecal samples from E3.5, E6.5, E8.5, E11.5, and E14.5 SPF+Veh and SPF+FLX dams. C, Taxa bar plots and D, Relative abundance of 20 rarest taxa identified with SILVA database in fecal samples from E3.5, E6.5, E8.5, E11.5, and E14.5 SPF+Veh and SPF+FLX dams. Relative abundance of *Lachnospiraceae* bacterium COE1 (E), *Blautia* (F), *Lachnoclostridium* (G), and *Lachnospiraceae* UCG-006 (H) based on 16S rRNA gene sequencing of fecal samples from SPF+Veh and SPF+FLX dams on gestational day E3.5, E6.5, E8.5, E11.5, and E14.5 (Kruskal-Wallis Test, n = 7, 7, respectively). n.s.: not significant, \* p < 0.05, \*\* p < 0.01

**Supplementary Figure 7. Interactions between maternal fluoxetine treatment and the maternal microbiome regulate gene ontology pathways.** A, Top 10 molecular function (MF) and cellular component (CC) gene ontology (GO) terms that are upregulated in E14.5 fetal brains from SPF+FLX compared to SPF+Veh and ABX+FLX dams, selected by most abundant and p.adjust < 0.05 Gene ratio: number of genes present in dataset vs present in GO term. B, Top 10 molecular function (MF) and cellular component (CC) gene ontology (GO) terms that are downregulated in E14.5 fetal brains from SPF+FLX compared to SPF+Veh and ABX+FLX dams. C, STRING protein interaction network of genes significantly upregulated, greater than 0.5-fold, in E14.5 fetal brain from SPF+FLX compared to SPF+Veh and ABX+FLX dams. D, STRING protein interaction network of genes significantly downregulated (>0.5 fold) in E14.5 fetal brains from SPF+FLX compared to SPF+Veh and ABX+FLX dams.

**Supplementary Figure 8. Effects of maternal fluoxetine treatment on fetal brain gene expression that occur independently of the maternal microbiota.** A, Heatmap of 600



differentially expressed genes in E14.5 fetal brain from SPF + Veh compared to SPF + FLX dams. **B, C**, GO enrichment analysis of upregulated (**B**) and downregulated (**C**) genes in E14.5 fetal brains from SPF + FLX compared to SPF + Veh dams. **D**, Volcano plot of 600 differentially expressed genes ( $p < 0.05$ ) in E14.5 fetal brains from SPF + FLX compared to SPF + Veh dams. Red, significant and greater than 0.5-fold or less than -0.5-fold, blue, significant ( $p < 0.05$ ).

**Supplementary Figure 9. Expression of select genes altered by maternal fluoxetine exposure and maternal microbiota status.**

**A**, Gene expression of *Hbb-bh1*, *Gm9159*, *Adam21*, and *Clec11a* that are upregulated in ABX+FLX compared to SPF+FLX greater than 0.5-fold and *Pole2*, *Rpa2*, and *Hist1h3a* that are upregulated in SPF+Veh compared to SPF+FLX greater than 0.5-fold. **B**, Gene expression of *Angptl6*, *Zfp455*, *Sla*, *Lsamp*, *5730409E04Rik*, *Opcml* that are upregulated in SPF+FLX compared to SPF+Veh and greater than 0.5-fold ( $p < 0.05$ ), and *Kcnj11*, *Adcy1*, *Gnal*, *Grm3*, *Car10* that are upregulated in SPF+FLX compared to ABX+FLX and greater than 0.5-fold ( $p < 0.05$ ). **C**, Quantitative RT-PCR measurement of *Opcml* gene expression in SPF + Veh, SPF + FLX, ABX + Veh, and ABX + FLX embryo brains. (One-way ANOVA with Tukey's,  $n = 6, 6, 6, 6$  dams). n.s.: not significant, \*  $p < 0.05$ , \*\*  $p < 0.01$ , \*\*\*  $p < 0.001$ , \*\*\*\*  $p < 0.0001$

Fig S1

[Click here to access/download;Figure;Supplementary Fig.](#)
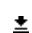**A**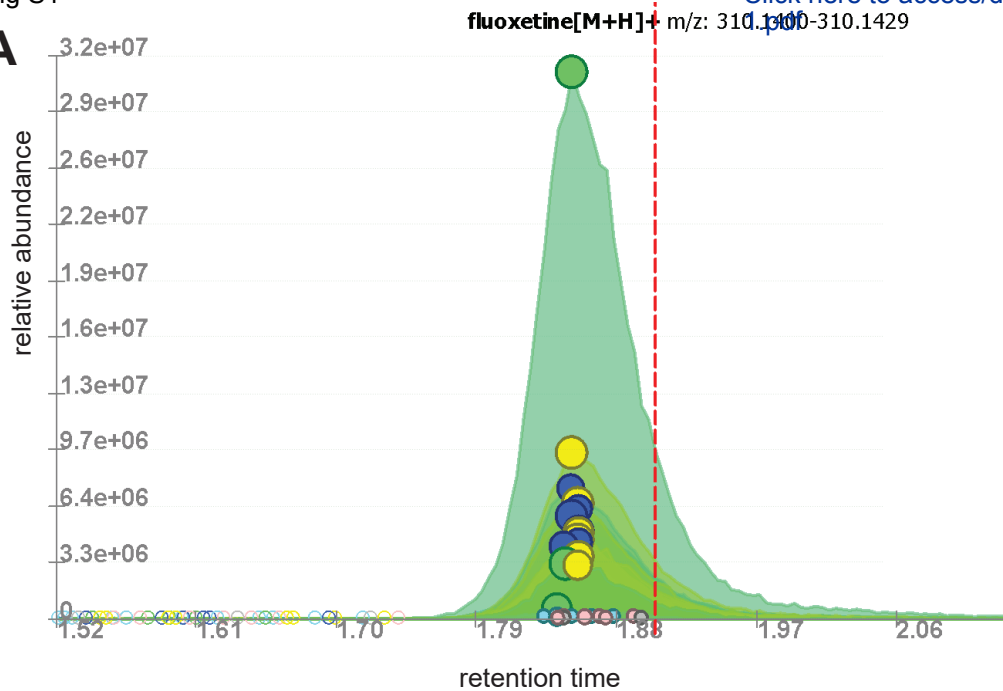

PEAK

|         |                  |
|---------|------------------|
| 4.1e+05 | 100nM Fluoxetine |
| 3e+06   | 1μM Fluoxetine   |
| 3e+07   | 10μM Fluoxetine  |
| 9.5e+04 | SPF + Veh - 1    |
| 5.5e+04 | SPF + Veh - 2    |
| 7.4e+04 | SPF + Veh - 3    |
| 7.3e+04 | SPF + Veh - 4    |
| 5.9e+04 | SPF + Veh - 5    |
| 5.1e+04 | SPF + Veh - 6    |
| 5.2e+04 | ABX + Veh - 1    |
| 6.5e+04 | ABX + Veh - 2    |
| 4.1e+04 | ABX + Veh - 3    |
| 5.4e+04 | ABX + Veh - 4    |
| 5e+04   | ABX + Veh - 5    |
| 2.3e+04 | ABX + Veh - 6    |
| 4.1e+06 | SPF + FLX - 1    |
| 5.8e+06 | SPF + FLX - 2    |
| 5.8e+06 | SPF + FLX - 3    |
| 3.8e+06 | SPF + FLX - 4    |
| 4.8e+06 | SPF + FLX - 5    |
| 7.1e+06 | SPF + FLX - 6    |
| 9.1e+06 | ABX + FLX - 1    |
| 3.3e+06 | ABX + FLX - 2    |
| 6.4e+06 | ABX + FLX - 3    |
| 4.4e+06 | ABX + FLX - 4    |
| 4.5e+06 | ABX + FLX - 5    |
| 2.8e+06 | ABX + FLX - 6    |
| 6.8e+04 | Blank            |
| 4.1e+04 | Blank            |
| 4.5e+04 | Blank            |

**B**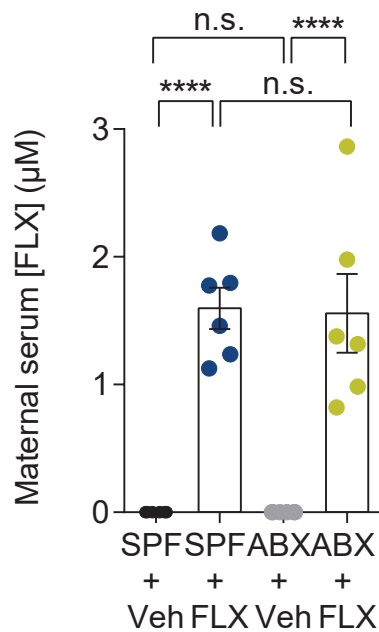

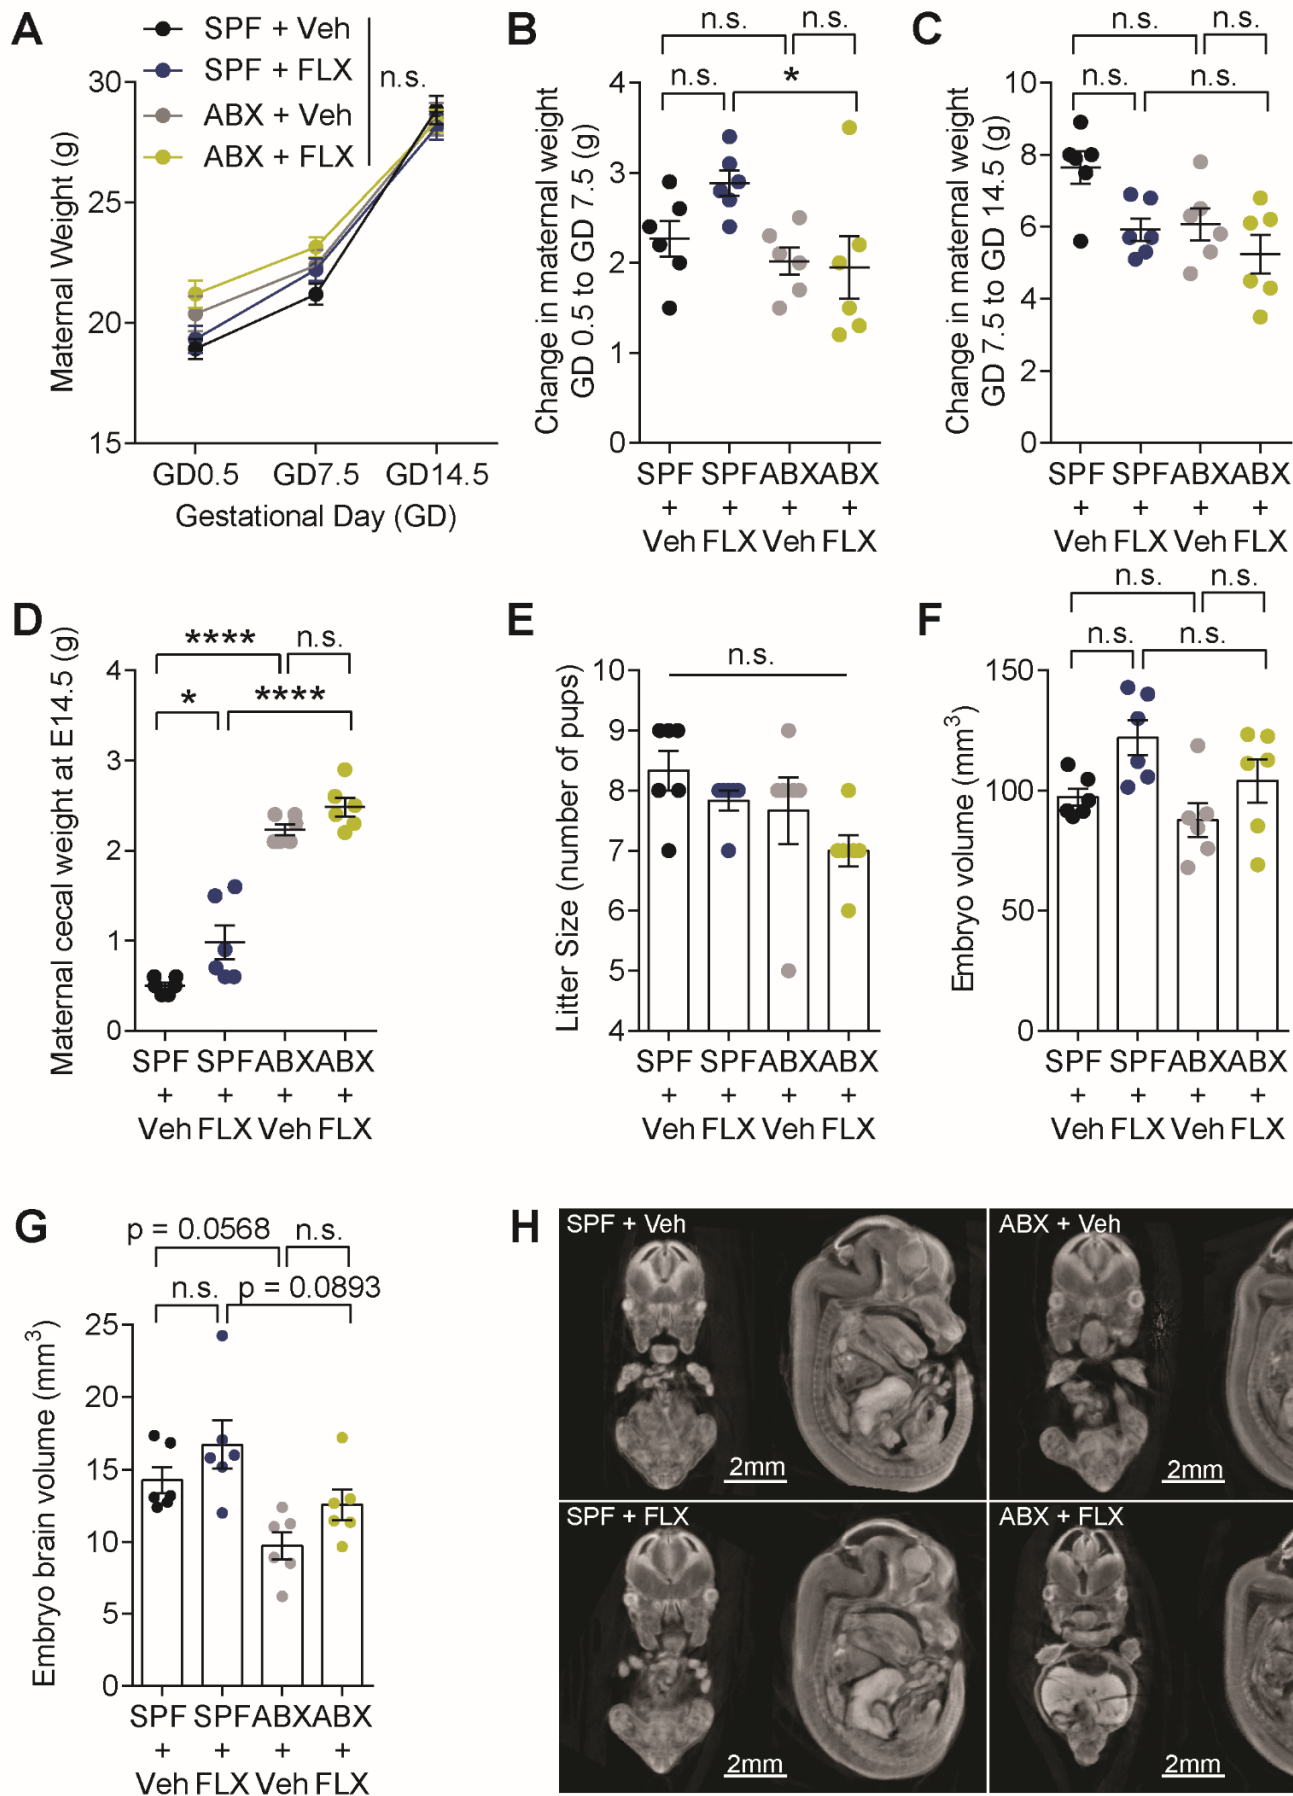

Fig S3 **A** Upregulated in SPF + FLX vs. SPF + Veh

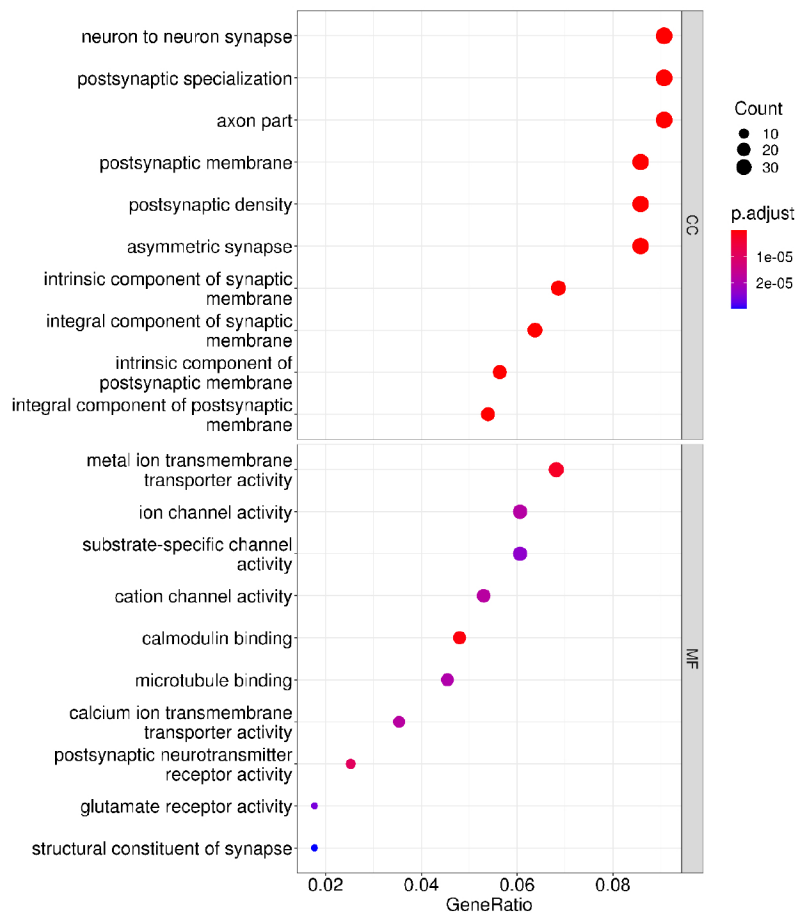

[Click here to access/download;Figure;Supplementary Fig. 3.pdf](#) **B** Downregulated in SPF + FLX vs. SPF + Veh

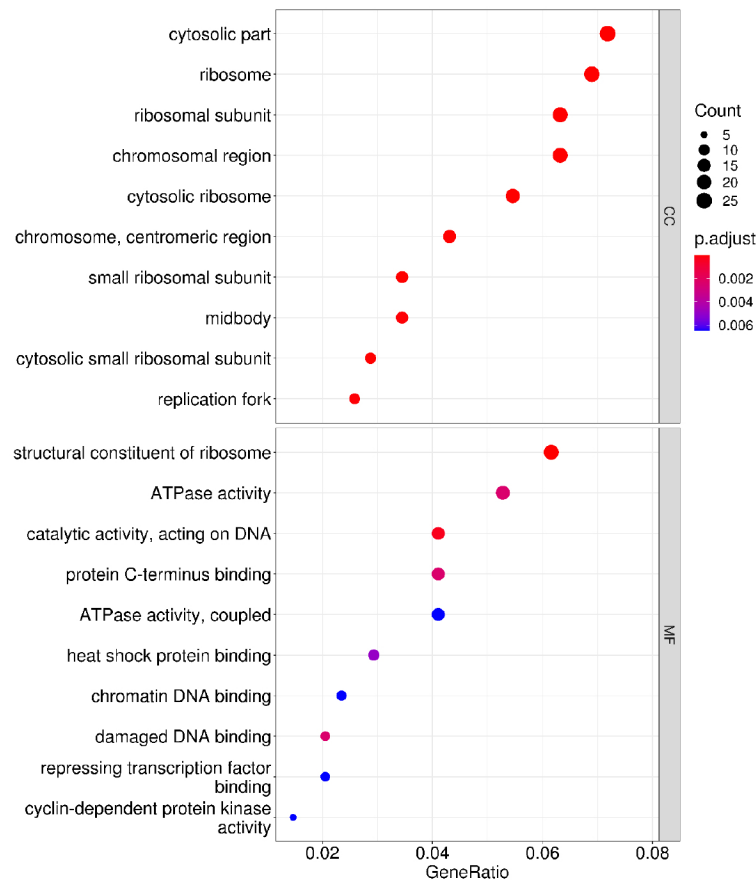

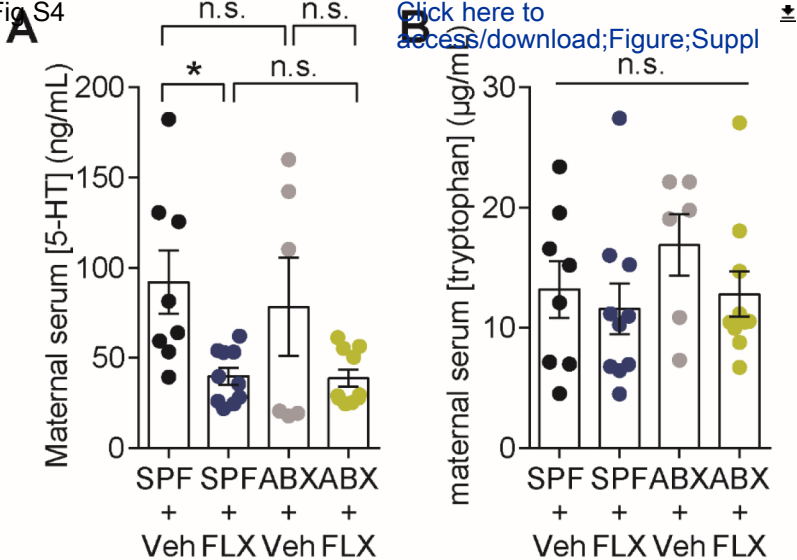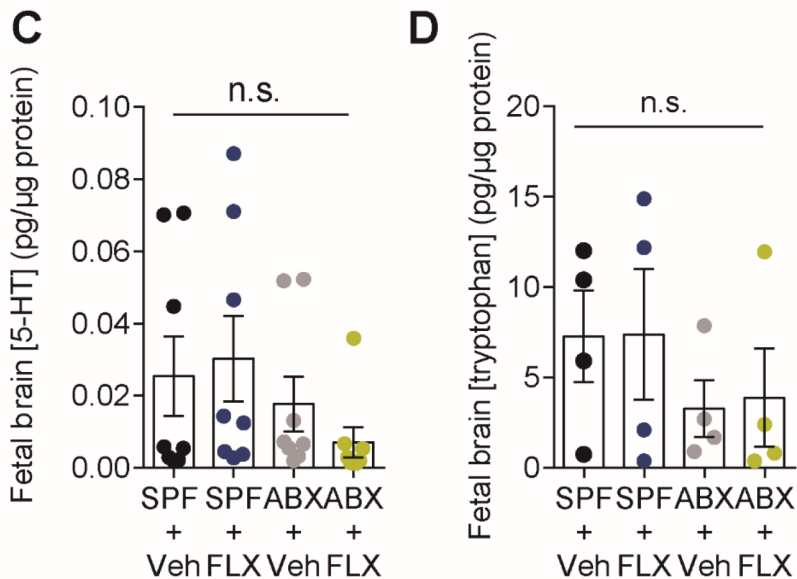



Fig S5

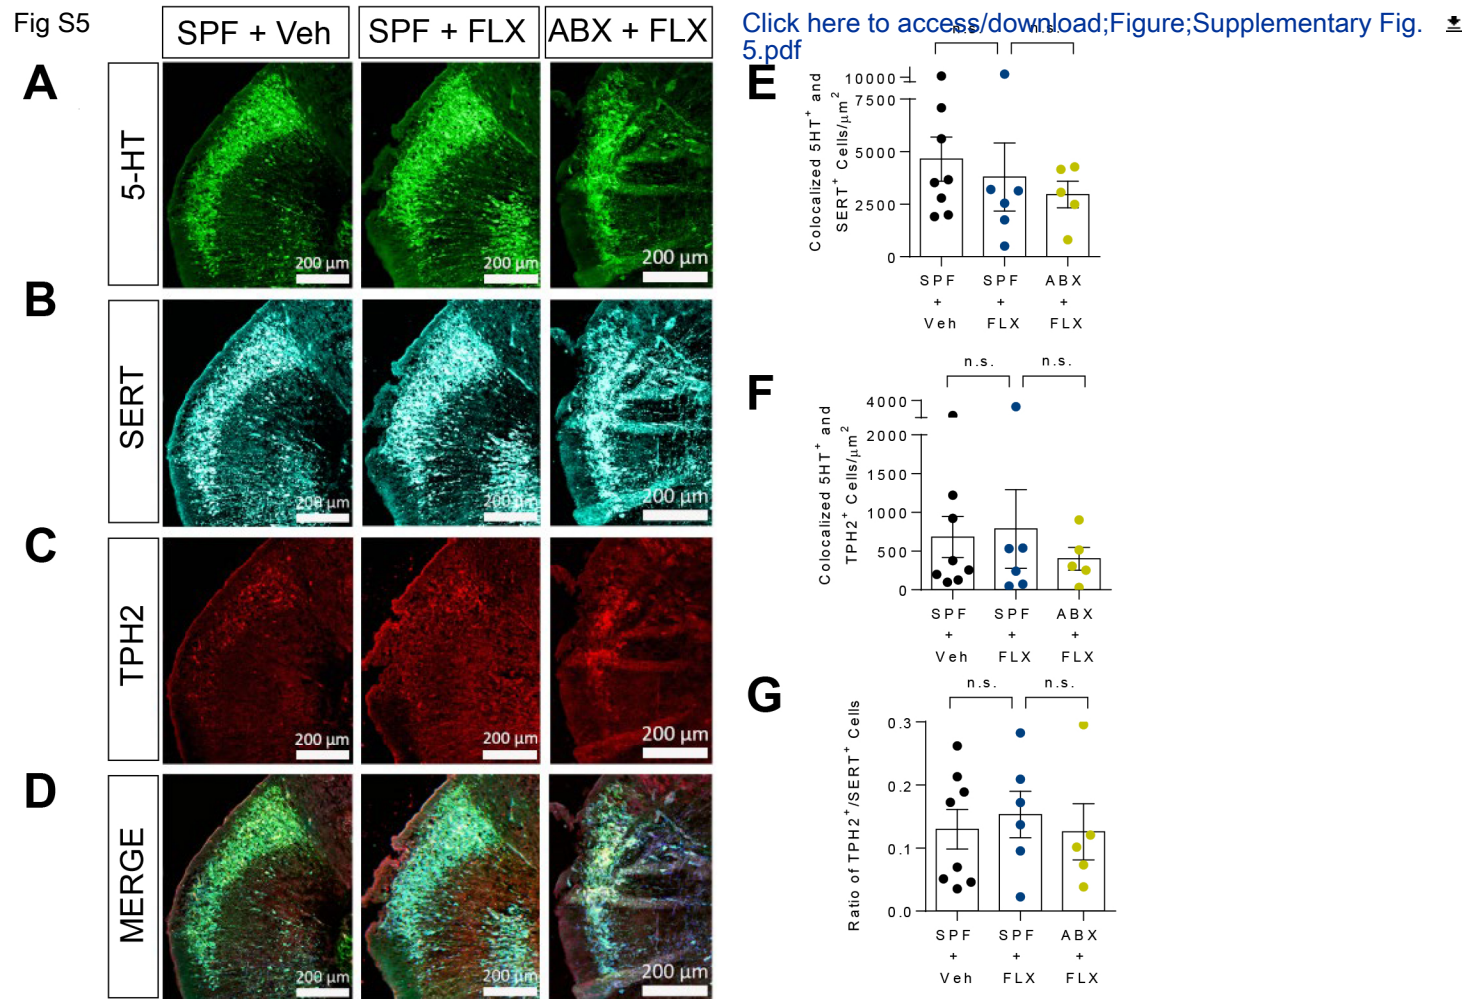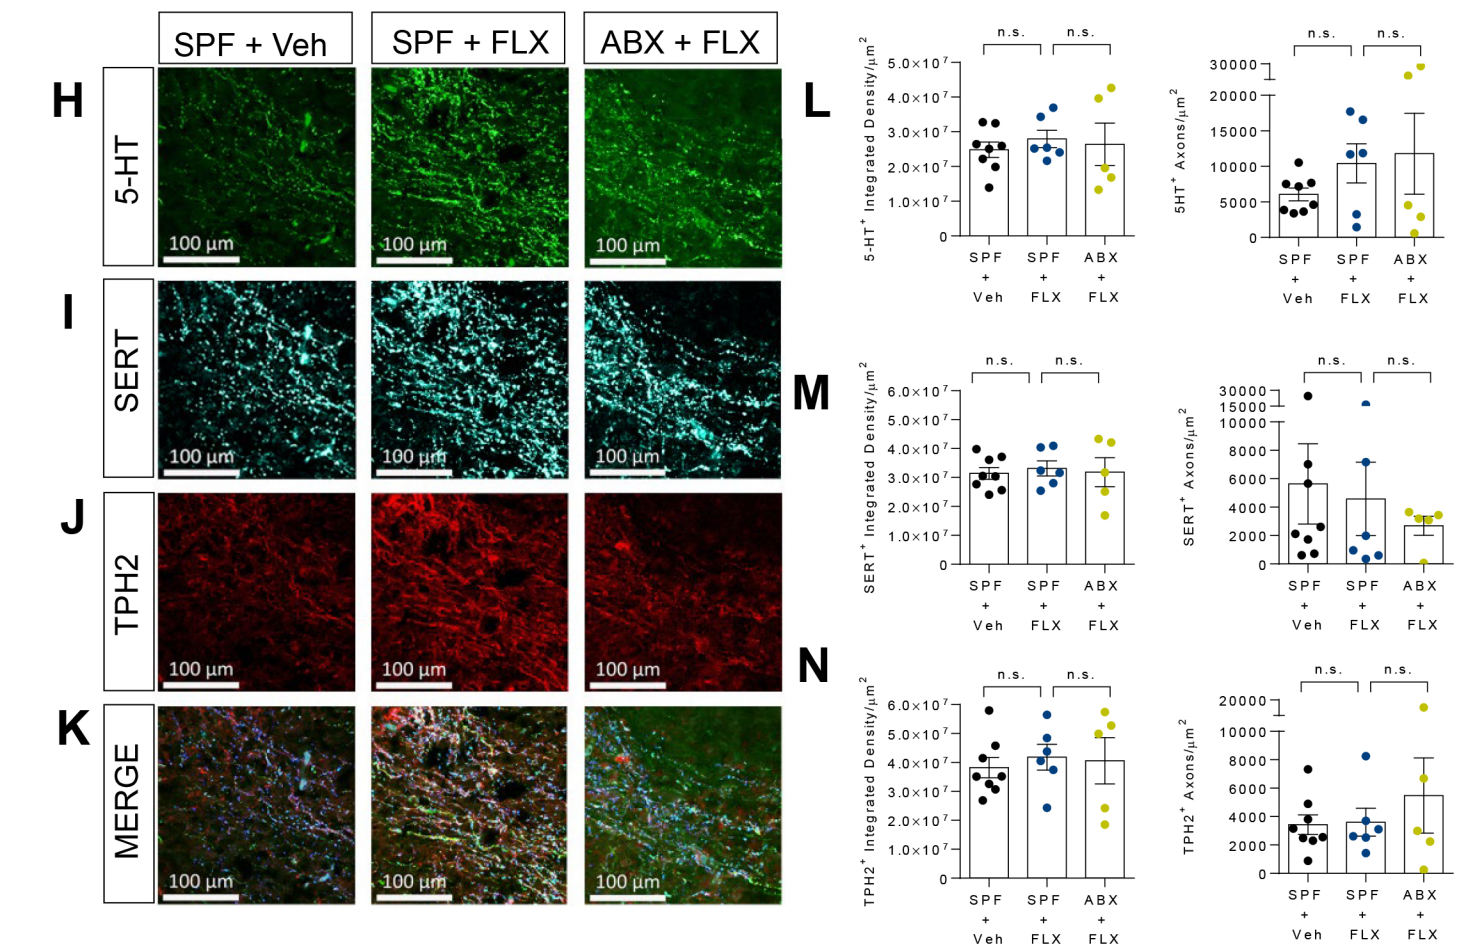

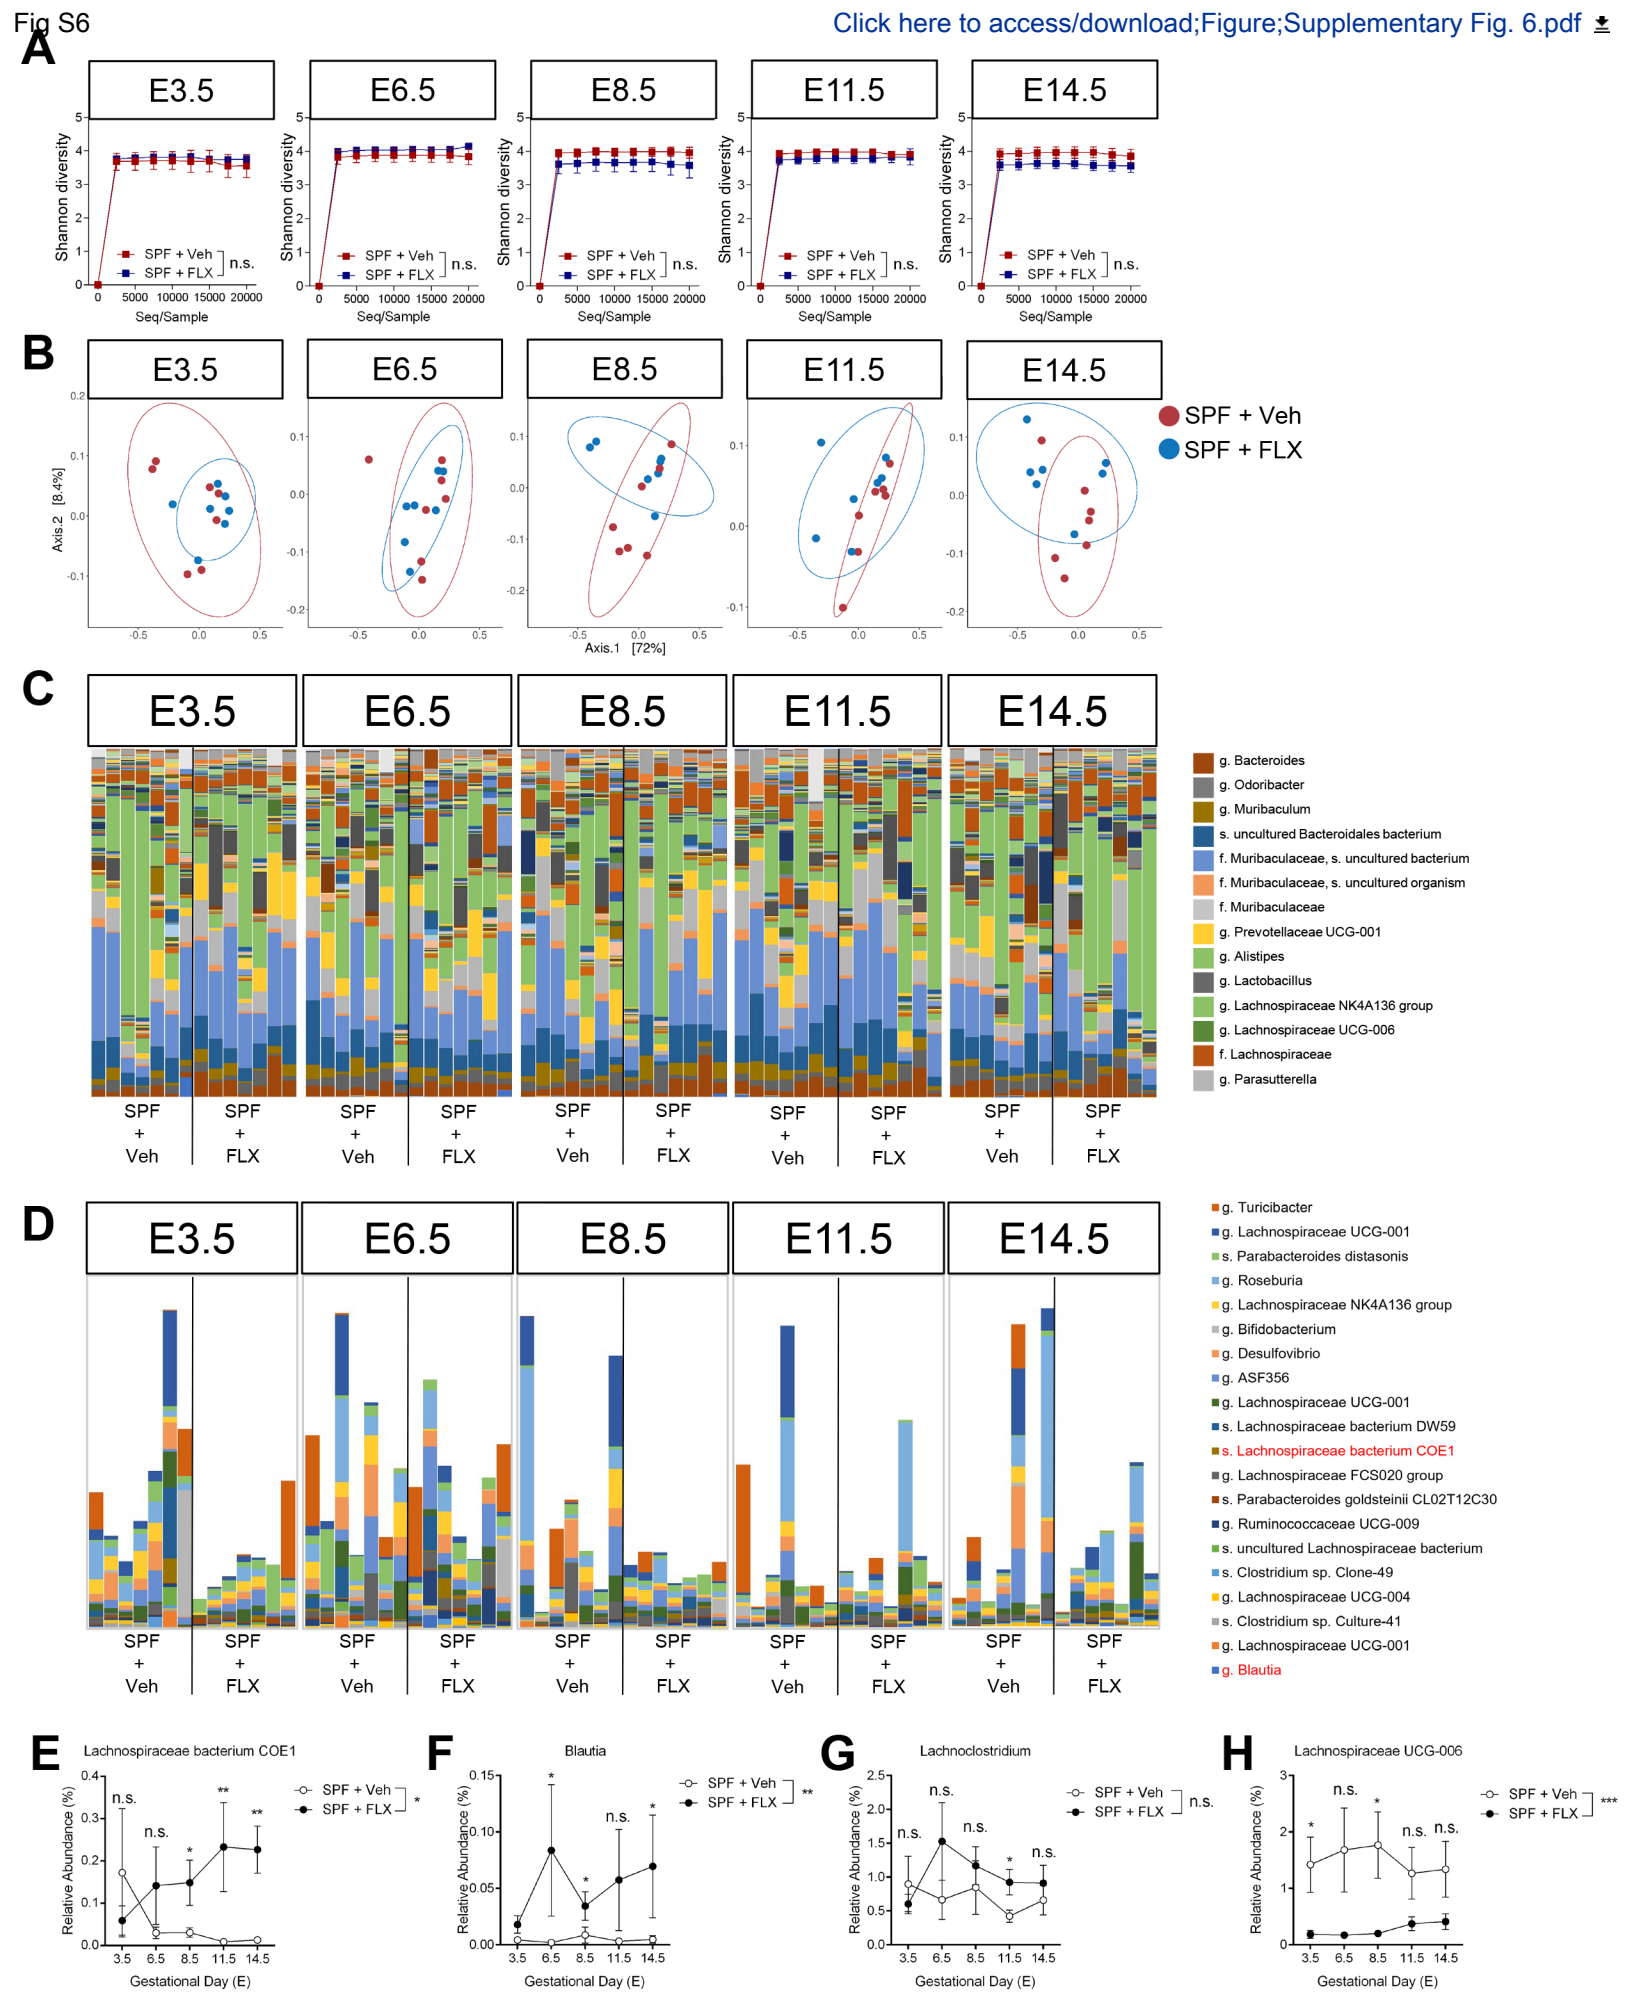



## 161 genes upregulated by FLX and prevented by ABX

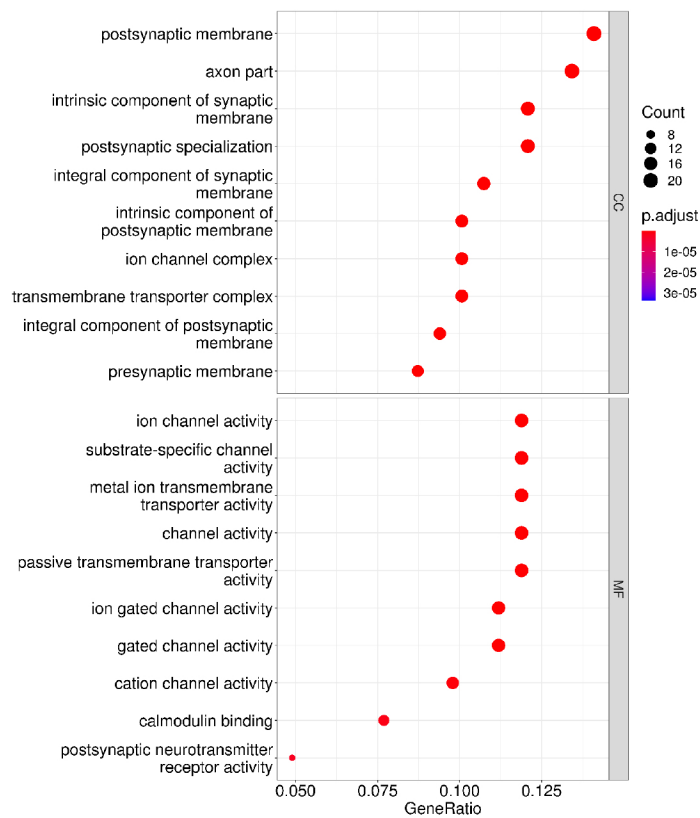

## 101 genes downregulated by FLX and prevented by ABX

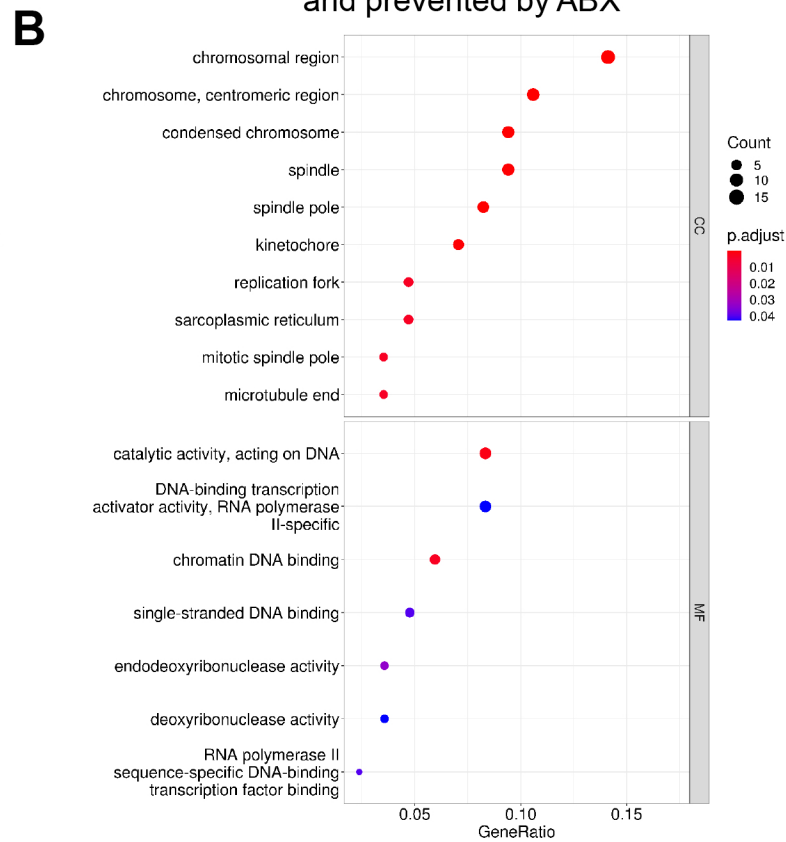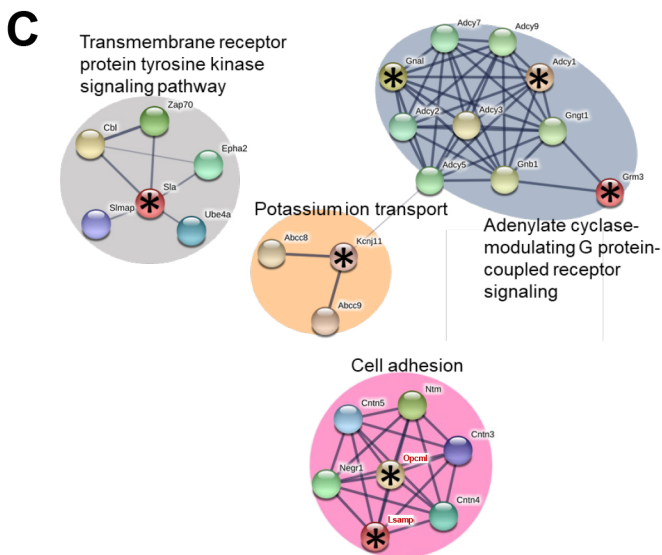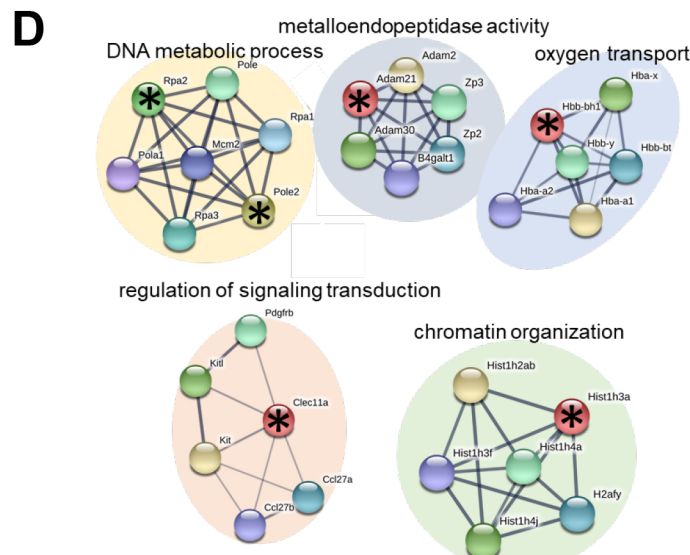



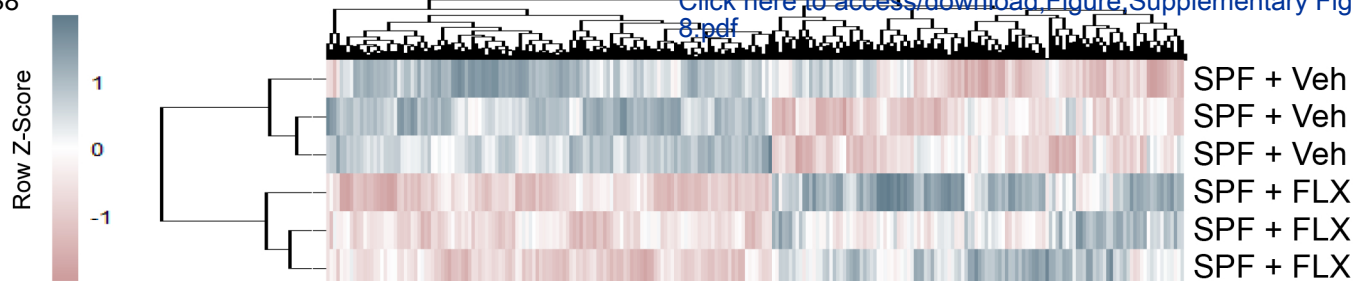

**B** Upregulated in SPF + FLX vs SPF + Veh

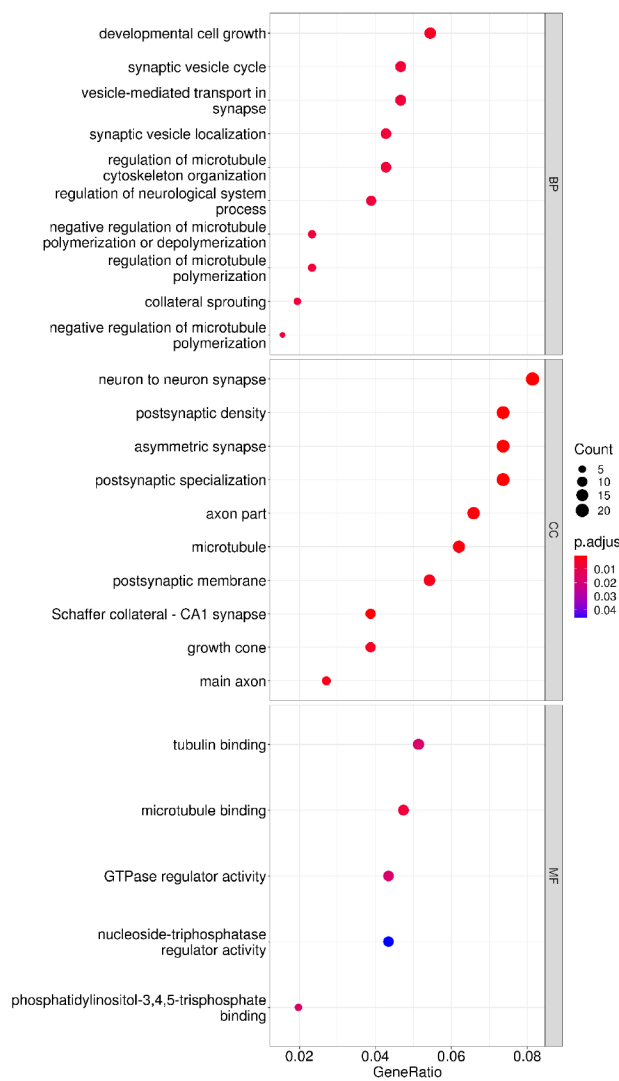

**C** Downregulated in SPF + FLX vs SPF + Veh

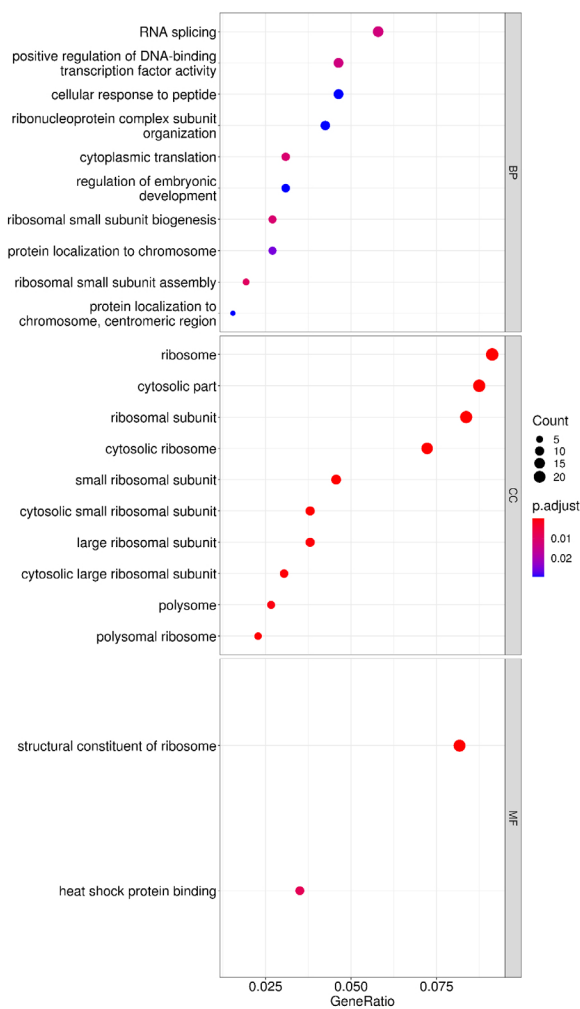

**D**

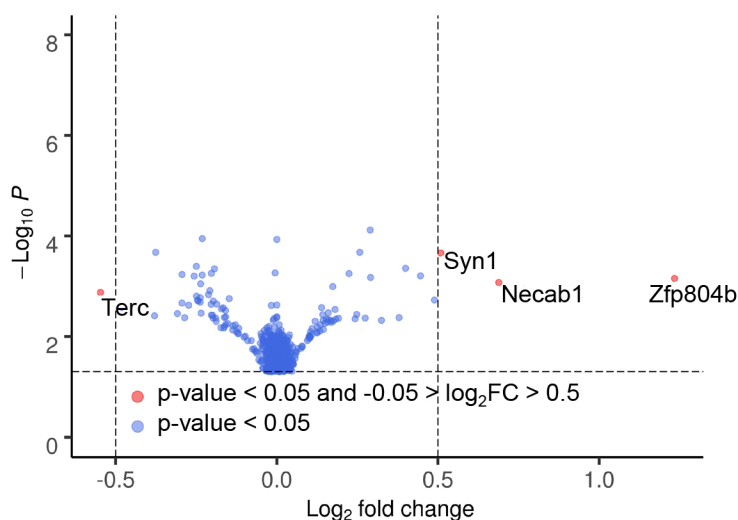

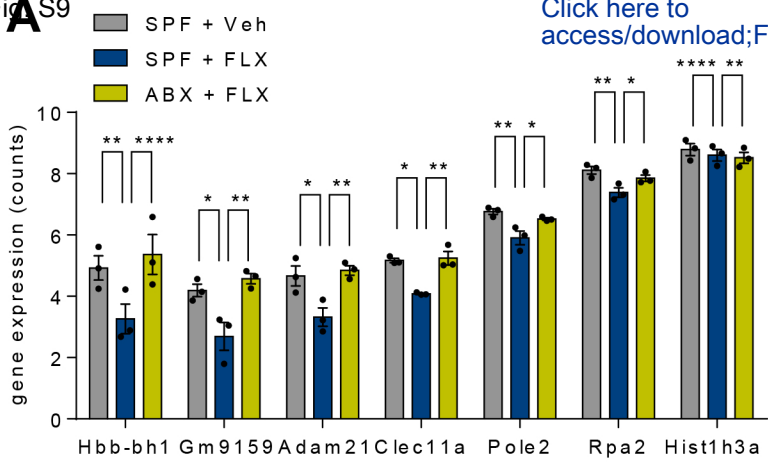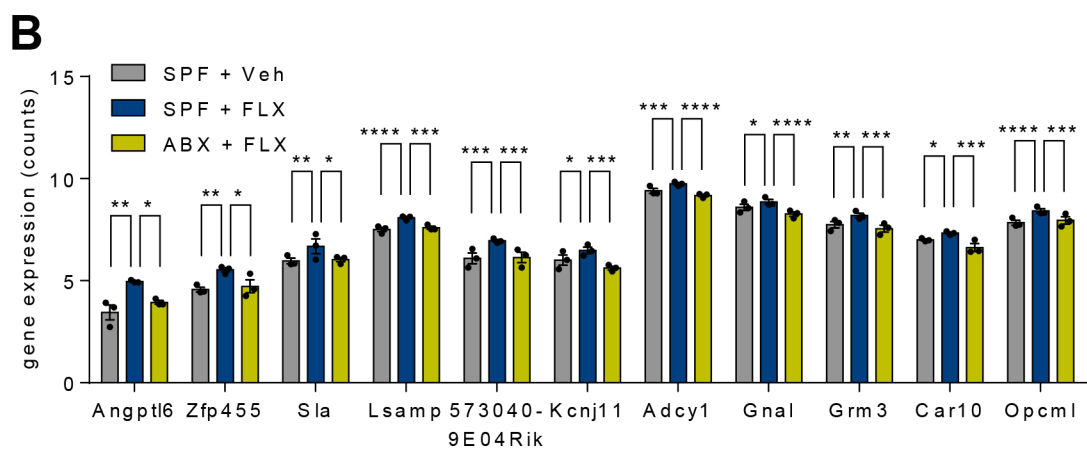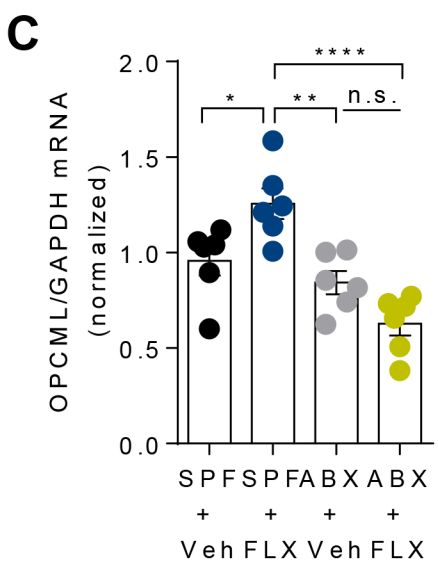

**Supplementary Table 1: Genes differentially regulated in fetal brains from E14.5 offspring of SPF + Veh, SPF + F**

| gene          | SPF + Veh 1 | SPF + Veh 2 | SPF + Veh 3 | SPF + FLX 1 | SPF + FLX 2 | SPF + FLX 3 |
|---------------|-------------|-------------|-------------|-------------|-------------|-------------|
| 1700021K19Rik | 9.346101469 | 9.338915248 | 9.111202775 | 9.27499792  | 9.221090734 | 9.358617304 |
| 1700030J22Rik | 5.336140447 | 5.690976344 | 5.95875192  | 4.863970092 | 5.21052692  | 4.059575235 |
| 1700048O20Rik | 5.188956249 | 6.305673598 | 5.683462387 | 6.814662667 | 6.569213246 | 5.991704972 |
| 1700084C01Rik | 4.143380003 | 3.974698911 | 3.031034773 | 4.963790449 | 4.557986608 | 4.752037851 |
| 1700108J01Rik | 1.476947654 | 1           | 1           | 1.605542449 | 2.594940123 | 3.22300096  |
| 1700109K24Rik | 7.281549797 | 7.141379091 | 7.245252952 | 7.158041089 | 7.624582834 | 7.851267163 |
| 1810026B05Rik | 9.415617687 | 9.438736133 | 9.385403919 | 9.457307408 | 9.452303112 | 9.393661963 |
| 2210018M11Rik | 9.533187698 | 9.49076391  | 9.971147811 | 9.574444018 | 9.48657402  | 9.609581718 |
| 2210408I21Rik | 7.986029518 | 7.95617194  | 7.68468273  | 7.91211235  | 8.214511904 | 8.290481041 |
| 2310040G24Rik | 2.121272526 | 3.712393585 | 2.72911076  | 3.752118759 | 3.597423784 | 3.780271631 |
| 2310047M10Rik | 6.285557633 | 6.364061526 | 6.540180369 | 5.702349231 | 5.821764658 | 5.923581073 |
| 2510003B16Rik | 3.178288549 | 2.978340632 | 3.493254909 | 1           | 2.007489679 | 1.793876829 |
| 2510009E07Rik | 9.926103553 | 9.768775216 | 9.939749302 | 9.91093719  | 9.920798064 | 9.939960272 |
| 2610020H08Rik | 6.947861633 | 6.634590065 | 6.719919814 | 6.4517769   | 6.087748098 | 6.291080771 |
| 2610305D13Rik | 3.511354355 | 4.144218708 | 3.678570668 | 5.057148905 | 4.072049632 | 4.828538958 |
| 2610524H06Rik | 6.720197947 | 6.787483949 | 5.994117534 | 6.760172391 | 6.897331778 | 7.464562498 |
| 2700029M09Rik | 7.593924365 | 7.799970662 | 7.695465596 | 7.788237489 | 7.988280606 | 8.03198727  |
| 2700094K13Rik | 8.752910114 | 8.59080531  | 8.307755651 | 8.225370976 | 8.290969184 | 7.97422651  |
| 2810004N23Rik | 7.701026658 | 7.770052417 | 7.857856143 | 7.469568968 | 7.511962665 | 6.951852343 |
| 2810013P06Rik | 7.50336876  | 7.479163946 | 6.84140367  | 7.64522093  | 7.589693592 | 7.726871747 |
| 2810417H13Rik | 9.328625742 | 9.044405533 | 9.444125024 | 8.985446693 | 8.765299502 | 8.699822577 |
| 2810459M11Rik | 5.443950196 | 5.846513718 | 5.885308556 | 6.125188133 | 6.029431246 | 6.492610349 |
| 2900011O08Rik | 8.696803675 | 8.629404224 | 8.899038863 | 8.71879587  | 8.862455543 | 8.955743083 |
| 2900026A02Rik | 6.772836778 | 6.886415994 | 7.618236209 | 6.674372271 | 7.150866018 | 6.648457271 |
| 2900060B14Rik | 5.4177436   | 4.558445459 | 5.168191412 | 4.699958789 | 4.382735357 | 3.617319577 |
| 2900092D14Rik | 8.535554284 | 8.147838842 | 8.715226328 | 8.686286504 | 8.751836595 | 8.503800836 |
| 3110039I08Rik | 11.44240821 | 11.40221849 | 11.56965968 | 11.5294615  | 11.59456118 | 11.50048696 |
| 4430402I18Rik | 2.121272526 | 3.093258183 | 1.825170741 | 3.045898796 | 3.126983752 | 3.926671999 |
| 4833422C13Rik | 6.597152809 | 6.566599494 | 6.491514775 | 6.518955674 | 6.984329822 | 6.808115555 |
| 4930447M23Rik | 4.533375098 | 4.03344674  | 4.896407951 | 5.227488897 | 5.043777717 | 5.477553384 |
| 4930471C04Rik | 2.565099681 | 2.978340632 | 1           | 1           | 1           | 1           |
| 4930480K15Rik | 6.92943055  | 7.250648107 | 7.090467934 | 7.279247656 | 7.589693592 | 7.756545074 |
| 4931406C07Rik | 6.032782666 | 6.194223517 | 6.189834702 | 6.567363402 | 6.49573456  | 6.583715671 |
| 4933413G19Rik | 1.834785459 | 2.716760345 | 2.72911076  | 2.625832949 | 3.011219987 | 3.22300096  |
| 4933417O13Rik | 1.834785459 | 1.40785378  | 1           | 1.605542449 | 3.126983752 | 1.793876829 |
| 4933431E20Rik | 6.549672846 | 6.837797832 | 7.023583845 | 7.037212907 | 7.217678952 | 7.244890188 |
| 5031426D15Rik | 6.032782666 | 6.644046623 | 6.761561469 | 6.689031347 | 7.051803628 | 7.113463403 |
| 5730409E04Rik | 5.638047729 | 6.556619606 | 6.09529247  | 7.071182259 | 6.855983658 | 6.934649122 |
| 5830444B04Rik | 1.834785459 | 1           | 1           | 3.635872179 | 1           | 3.433590479 |
| 6330403K07Rik | 10.45194395 | 10.60347423 | 10.28850038 | 10.36570695 | 10.39140551 | 10.6158513  |
| 6430548M08Rik | 8.66094493  | 8.660022799 | 8.510645557 | 8.700825624 | 8.569450464 | 8.759660317 |
| 8030451O07Rik | 7.889215153 | 7.952370979 | 7.68468273  | 8.008763986 | 8.19142666  | 7.940151466 |
| 9130011E15Rik | 7.288797629 | 7.685571983 | 7.500202711 | 7.725628009 | 7.687220289 | 7.982620987 |
| 9130019O22Rik | 6.285557633 | 6.128372165 | 5.922497536 | 5.64335602  | 6.527684741 | 5.852080256 |
| 9330159F19Rik | 10.65067443 | 10.70183555 | 10.79649095 | 10.62780631 | 10.89144181 | 10.70859278 |

|               |             |             |             |             |             |             |
|---------------|-------------|-------------|-------------|-------------|-------------|-------------|
| 9330182L06Rik | 8.169980108 | 8.069293504 | 7.536637639 | 8.060413729 | 8.040888925 | 8.242355329 |
| 9430020K01Rik | 7.968082659 | 7.581141728 | 7.986347078 | 8.0938474   | 8.059222188 | 8.04807432  |
| 9430021M05Rik | 3.697138272 | 3.298813141 | 3.678570668 | 4.811344491 | 4.638225882 | 4.494694577 |
| 9430076C15Rik | 6.148854342 | 6.352571455 | 6.632847408 | 5.840069872 | 5.984092579 | 4.828538958 |
| 9530059O14Rik | 7.128377482 | 6.837797832 | 5.95875192  | 6.689031347 | 6.538179474 | 6.934649122 |
| 9930104L06Rik | 7.191610894 | 6.910124163 | 7.023583845 | 6.990639276 | 7.15768828  | 6.648457271 |
| A230077H06Rik | 4.67286394  | 5.4098024   | 5.448709844 | 4.053408608 | 4.335381646 | 4.397591105 |
| A2m           | 6.211215576 | 6.956402762 | 5.726154136 | 6.081411933 | 6.506463432 | 6.710417912 |
| A830011K09Rik | 4.80004717  | 4.745775733 | 5.547239836 | 4.376833985 | 4.855205563 | 4.059575235 |
| A830080D01Rik | 8.571657212 | 8.541057492 | 8.492211903 | 8.653027659 | 8.699032582 | 8.486196965 |
| A930004D18Rik | 6.195876154 | 6.566599494 | 6.587257783 | 5.840069872 | 6.129989072 | 5.852080256 |
| Aatk          | 8.747659671 | 8.734948181 | 8.504527138 | 8.818827371 | 8.535805754 | 8.798216354 |
| Abca1         | 10.28348632 | 10.33084205 | 10.3201978  | 10.35195507 | 10.36585709 | 10.26474655 |
| Abca2         | 9.176730549 | 9.313953508 | 9.241993544 | 9.313349497 | 9.373912819 | 9.633767706 |
| Abcb7         | 9.198059606 | 9.056849367 | 9.166500989 | 9.049329502 | 9.16801822  | 9.026464761 |
| Abcc8         | 6.513008451 | 7.044731214 | 6.898513064 | 6.551407287 | 7.0370798   | 7.244890188 |
| Abhd17b       | 8.181707737 | 8.134482339 | 8.314765989 | 7.979250015 | 8.167966003 | 8.071873474 |
| Abhd8         | 8.731792711 | 8.841537664 | 8.516738137 | 8.637996215 | 8.656315924 | 8.735028825 |
| Abi2          | 10.9675936  | 10.99529229 | 10.8944987  | 10.90001824 | 11.09574448 | 11.02230896 |
| Abi3          | 3.047666507 | 2.716760345 | 1.825170741 | 3.509431521 | 2.747440291 | 2.67860439  |
| Abl1          | 10.26155144 | 10.10809103 | 10.38491145 | 10.12011225 | 9.904666785 | 10.17968691 |
| Ablim1        | 8.982564457 | 9.201566139 | 9.245666435 | 9.171799586 | 9.280116701 | 9.289253594 |
| Ablim2        | 5.219618891 | 5.270214764 | 4.561255977 | 4.224165625 | 5.262085683 | 5.852080256 |
| Ablim3        | 8.093405717 | 8.507776492 | 8.220861814 | 8.444226815 | 8.501357653 | 8.480280949 |
| Acan          | 1.834785459 | 1           | 2.72911076  | 1.605542449 | 2.007489679 | 2.976330056 |
| Acap3         | 9.438607959 | 9.460308319 | 9.411797686 | 9.389369025 | 9.298753038 | 9.479204869 |
| Ackr1         | 5.4177436   | 4.879886885 | 5.228828563 | 5.891676346 | 5.359984332 | 6.024597402 |
| Acot7         | 8.806916008 | 8.907805273 | 8.751845482 | 8.946323819 | 8.758583753 | 8.774239848 |
| Acpp          | 2.565099681 | 1.985596612 | 1           | 1           | 1           | 2.303023309 |
| Acr           | 5.868356087 | 5.431808275 | 6.220020382 | 5.61292943  | 5.537856244 | 6.207605066 |
| AcsI3         | 9.51166721  | 9.293067455 | 9.472612952 | 9.373575012 | 9.267557374 | 9.25501321  |
| Acsm3         | 3.781766418 | 3.093258183 | 2.346809092 | 2.358763209 | 3.514815644 | 3.433590479 |
| Acss1         | 8.374570657 | 8.484277645 | 8.655735526 | 8.054765339 | 8.164583118 | 8.133482864 |
| Acta2         | 4.916921051 | 4.879886885 | 4.123905703 | 5.101656215 | 4.183213222 | 4.397591105 |
| Actl6b        | 8.526385598 | 8.585907017 | 8.782510115 | 8.61898396  | 8.612295778 | 8.674138638 |
| Actr1a        | 11.04721297 | 11.00403994 | 10.93941396 | 11.06504195 | 10.90772081 | 11.05252647 |
| Adam12        | 6.423650789 | 6.566599494 | 5.847135518 | 6.249069934 | 6.452002941 | 6.178670863 |
| Adam21        | 4.627849702 | 5.245578321 | 4.123905703 | 2.851100857 | 3.887381517 | 3.22300096  |
| Adamts1       | 7.222217761 | 7.510521207 | 7.424450483 | 7.229976337 | 7.24995982  | 7.403351065 |
| Adamts10      | 9.243529293 | 9.15602381  | 9.115223714 | 8.924809803 | 9.082767755 | 8.849602658 |
| Adamts12      | 7.001782848 | 7.180896481 | 7.040597805 | 7.209786787 | 6.91354482  | 7.082557119 |
| Adamts15      | 6.654386342 | 6.305673598 | 5.448709844 | 5.450355447 | 6.312243287 | 5.656095563 |
| Adamts17      | 6.62031939  | 6.744172339 | 6.278560623 | 6.167675041 | 6.91354482  | 6.5159317   |
| Adamts2       | 5.443950196 | 5.294437552 | 4.652620793 | 5.343221434 | 5.157057049 | 6.119001134 |
| Adamts9       | 6.833568491 | 6.576510821 | 6.698639411 | 6.518955674 | 6.91354482  | 6.468905804 |
| Adamtsl1      | 5.997828709 | 5.862804336 | 4.896407951 | 6.502451963 | 6.336497133 | 6.024597402 |
| Adamtsl4      | 7.09569014  | 7.015885123 | 7.13867163  | 7.002424395 | 6.921583524 | 7.018684418 |

|           |             |             |             |             |             |             |
|-----------|-------------|-------------|-------------|-------------|-------------|-------------|
| Adap1     | 7.35243993  | 7.311258974 | 6.953447591 | 7.32689167  | 7.306305361 | 7.272538694 |
| Adap2     | 4.077947413 | 3.712393585 | 4.123905703 | 4.914743422 | 4.072049632 | 5.379248858 |
| Adck4     | 7.478228847 | 7.457873945 | 6.879726671 | 7.288903163 | 7.022204154 | 7.440388676 |
| Adcy1     | 9.278536596 | 9.644723124 | 9.281890039 | 9.641924457 | 9.749615404 | 9.839556496 |
| Adcyap1   | 5.943756695 | 6.281640304 | 5.922497536 | 6.188458315 | 5.872409042 | 6.344163211 |
| Adcyap1r1 | 9.466040978 | 9.562334449 | 9.652153923 | 9.528316673 | 9.742826074 | 9.761215419 |
| Adgra3    | 7.366209338 | 7.141379091 | 7.057413452 | 7.115265253 | 7.243561171 | 6.769826698 |
| Adgrb2    | 9.654573683 | 9.675021676 | 9.690388022 | 9.837176609 | 9.557932647 | 9.862480081 |
| Adgrg1    | 10.19463687 | 10.14185837 | 10.4815247  | 10.22316682 | 10.00926497 | 10.19059769 |
| Adgrg6    | 5.188956249 | 4.476126405 | 3.678570668 | 5.011224712 | 5.129560124 | 4.585672437 |
| Adgrl4    | 6.049947112 | 6.281640304 | 5.807924923 | 6.644599561 | 6.696475136 | 6.5159317   |
| Adgrv1    | 11.85779579 | 11.7389733  | 11.85759426 | 11.6278456  | 11.65998933 | 11.44385558 |
| Adora1    | 5.726108215 | 5.616073469 | 5.287019574 | 5.840069872 | 6.101966287 | 6.317866116 |
| Adprh     | 8.883116952 | 8.6877207   | 8.856435913 | 8.486797657 | 8.281630696 | 8.54405996  |
| Adra1b    | 4.48371173  | 4.295897557 | 3.990174756 | 3.217496026 | 2.747440291 | 3.433590479 |
| Adrm1     | 8.113954211 | 8.157775692 | 8.22830624  | 7.848242506 | 7.705958732 | 7.823497767 |
| Adsl      | 8.565702449 | 8.281087539 | 8.454622588 | 7.924553886 | 8.112864261 | 7.982620987 |
| Aebp2     | 9.30558615  | 9.144409993 | 9.296128597 | 9.291902318 | 9.338324395 | 9.147128257 |
| Aes       | 10.0947947  | 10.17892522 | 10.28850038 | 10.14823278 | 9.967166568 | 10.23870012 |
| Aggf1     | 8.829456528 | 8.804066247 | 9.095006004 | 8.595833508 | 8.457798746 | 8.621356935 |
| Agk       | 7.324500472 | 7.829281054 | 7.595389438 | 7.126078702 | 7.54875884  | 6.769826698 |
| Agtbp1    | 10.0947947  | 10.21981429 | 9.94653532  | 10.11740529 | 10.17226158 | 10.26474655 |
| Agtrap    | 6.066909744 | 5.762181547 | 6.220020382 | 5.144831462 | 5.516785121 | 5.159929718 |
| Ahcy1     | 10.18398643 | 10.19911371 | 10.4162113  | 10.25799466 | 10.3906818  | 10.4426109  |
| Ahi1      | 10.71866571 | 10.79391661 | 10.66689048 | 10.77333548 | 10.87549441 | 10.96521082 |
| Ahsa1     | 9.395615872 | 9.397397739 | 9.581251927 | 9.177008654 | 9.061098999 | 8.972698064 |
| AI450353  | 4.716516059 | 4.558445459 | 3.031034773 | 3.959799763 | 4.128701845 | 3.22300096  |
| AI504432  | 8.925583285 | 8.911725319 | 9.024065988 | 9.077457634 | 9.140731397 | 8.858752117 |
| AI593442  | 6.803522181 | 7.35797852  | 6.491514775 | 7.317487909 | 7.224193168 | 8.03198727  |
| Aifm3     | 5.544260695 | 5.894843895 | 6.249587406 | 4.51488159  | 5.537856244 | 5.217963548 |
| Aip       | 6.585428507 | 7.127962371 | 7.548580966 | 6.746222061 | 6.210932461 | 6.538882047 |
| Airn      | 5.219618891 | 5.516621281 | 5.396800833 | 5.186752068 | 5.451659813 | 5.569584671 |
| Ak1       | 7.605580105 | 7.849858362 | 7.536637639 | 7.91211235  | 7.860301472 | 7.814121237 |
| Akap12    | 10.10612171 | 10.02638538 | 10.06352273 | 10.00327287 | 9.881157436 | 9.918244396 |
| Akap13    | 9.876454579 | 9.871975961 | 10.0148496  | 9.776699747 | 9.772018489 | 9.773362192 |
| Akap9     | 12.83049905 | 12.94439387 | 12.88896457 | 12.85649661 | 12.86954536 | 12.88964432 |
| Akr1c12   | 1           | 1.40785378  | 1           | 1.605542449 | 1.742960444 | 1.793876829 |
| Alas2     | 8.201044388 | 8.256637645 | 8.492211903 | 8.805435425 | 8.281630696 | 8.509621381 |
| Aldh16a1  | 6.762461539 | 7.225672326 | 6.802034831 | 6.268720836 | 6.484925303 | 6.344163211 |
| Aldh1l1   | 7.840725169 | 7.959962914 | 7.288625645 | 7.614834063 | 7.847700302 | 7.832813749 |
| Aldh2     | 8.374570657 | 8.100539865 | 8.328685292 | 7.886902698 | 7.822162881 | 8.023875973 |
| Aldoa     | 10.24674069 | 10.34323165 | 10.340949   | 10.17451409 | 10.0979493  | 10.02775742 |
| Alkbh3    | 7.08740126  | 6.726476939 | 6.563911094 | 6.732135518 | 6.648847398 | 6.468905804 |
| Alkbh5    | 9.359931217 | 9.328689136 | 9.618555504 | 9.223062771 | 9.283239523 | 9.173032585 |
| Alms1     | 10.30330446 | 10.29227019 | 10.2060692  | 10.05370086 | 10.13558386 | 9.992861547 |
| Alpl      | 5.962006808 | 5.878913056 | 6.278560623 | 5.673154141 | 6.029431246 | 4.671251885 |
| Alx4      | 5.544260695 | 5.270214764 | 5.168191412 | 5.450355447 | 5.072942274 | 5.217963548 |

|           |             |             |             |             |             |             |
|-----------|-------------|-------------|-------------|-------------|-------------|-------------|
| Amigo2    | 6.537554618 | 6.141785093 | 6.09529247  | 5.759024621 | 5.821764658 | 5.737711018 |
| Amigo3    | 6.549672846 | 6.59613151  | 6.388963369 | 5.840069872 | 6.249762475 | 5.429238262 |
| Amotl1    | 10.10406886 | 10.08049631 | 10.25244446 | 9.958600006 | 9.806070012 | 9.780601468 |
| Amph      | 8.463725107 | 8.580992035 | 8.644650427 | 8.439899818 | 8.661125159 | 8.577695585 |
| Amz2      | 9.853420476 | 9.823900798 | 9.796861201 | 9.774983106 | 9.696728521 | 9.719134247 |
| Angptl6   | 3.697138272 | 3.913456893 | 2.72911076  | 4.914743422 | 4.920840026 | 5.036351157 |
| Ank2      | 11.95439322 | 11.97598488 | 12.03415148 | 11.97224057 | 12.02755802 | 12.12001788 |
| Ankrd11   | 10.9292652  | 10.89391024 | 11.27661531 | 11.08803729 | 10.8760116  | 11.01618876 |
| Ankrd12   | 10.39431253 | 10.48152259 | 10.42757378 | 10.44341425 | 10.49739176 | 10.68692383 |
| Ankrd13d  | 7.120274815 | 7.40323246  | 7.230500702 | 7.552070109 | 7.609733496 | 7.601670527 |
| Ankrd17   | 11.15227429 | 11.00908023 | 11.21612361 | 11.18494742 | 11.21909162 | 11.36898929 |
| Ankrd29   | 5.443950196 | 4.847509657 | 5.168191412 | 5.673154141 | 6.073388388 | 5.776850189 |
| Ankrd37   | 5.768201518 | 5.364757319 | 5.038690263 | 4.224165625 | 4.286420738 | 4.671251885 |
| Ankrd49   | 7.588060991 | 7.581141728 | 7.629525334 | 7.652718685 | 7.574478845 | 7.390790838 |
| Anks1b    | 9.438607959 | 9.688793859 | 9.469475264 | 9.62677627  | 9.671924503 | 9.673197903 |
| Anln      | 8.89028205  | 8.602978775 | 9.086838916 | 8.515867036 | 8.607320697 | 8.276893869 |
| Anp32a    | 10.31488848 | 10.38683256 | 10.48618962 | 10.56561646 | 10.13212409 | 10.34669592 |
| Anp32b    | 7.079064482 | 6.293706996 | 7.487850347 | 7.30802245  | 6.968897231 | 6.863708404 |
| Anp32e    | 9.950301668 | 9.756839142 | 10.02129217 | 10.01058568 | 9.814728573 | 9.724149156 |
| Antxr1    | 7.58217369  | 6.978997016 | 7.398289287 | 7.696904902 | 7.574478845 | 7.69657526  |
| Anxa2     | 8.297618446 | 8.433375223 | 8.205856719 | 8.12652378  | 8.08807928  | 8.337053056 |
| Anxa3     | 6.423650789 | 6.293706996 | 6.388963369 | 5.813557456 | 5.714808604 | 5.217963548 |
| Anxa5     | 7.515776323 | 7.685571983 | 7.023583845 | 7.08232993  | 6.830593737 | 6.985655341 |
| Anxa6     | 8.374570657 | 8.241143333 | 7.959760344 | 7.979250015 | 8.137230627 | 8.163328226 |
| Ap1m2     | 1.476947654 | 2.56572585  | 1           | 1           | 1.418787199 | 1.793876829 |
| Ap2m1     | 10.0947947  | 10.20790793 | 10.19281245 | 10.20415732 | 10.10943108 | 9.988700102 |
| Apbb2     | 9.929585375 | 9.88499531  | 10.02129217 | 9.861645763 | 9.978770316 | 10.0873516  |
| Apbb3     | 7.68463547  | 7.685571983 | 7.259855879 | 7.452487101 | 7.522571971 | 7.851267163 |
| Apc       | 12.77416105 | 12.83317655 | 12.90908008 | 12.83976104 | 12.9485046  | 12.97600128 |
| Apoa1     | 5.249643377 | 3.39155842  | 5.448709844 | 3.509431521 | 2.594940123 | 1           |
| Apobec1   | 4.716516059 | 4.517872985 | 4.246285218 | 2.625832949 | 3.749675008 | 1.793876829 |
| Aqp1      | 6.100248163 | 5.672612041 | 5.104893407 | 5.61292943  | 6.23693491  | 5.099463222 |
| Arap1     | 6.47538792  | 6.576510821 | 6.93536751  | 6.502451963 | 6.538179474 | 5.656095563 |
| Arap2     | 6.100248163 | 6.452829242 | 5.038690263 | 6.551407287 | 6.429629768 | 6.881773285 |
| Arfgap1   | 8.966835264 | 8.899933082 | 9.024065988 | 8.828790376 | 8.644222225 | 8.779067133 |
| Arfgef3   | 8.987027193 | 9.031853431 | 8.693876066 | 8.861512083 | 9.091701221 | 9.018322268 |
| Arhgap11a | 9.170858387 | 8.882062009 | 9.551885811 | 9.240583044 | 9.176440585 | 9.014233722 |
| Arhgap12  | 10.08233569 | 10.10467042 | 9.96001234  | 9.995922792 | 10.1303911  | 10.02775742 |
| Arhgap19  | 8.275899006 | 8.058725832 | 8.369655123 | 8.12652378  | 7.953418955 | 7.62330656  |
| Arhgap21  | 11.35274893 | 11.26300939 | 11.48518345 | 11.31231304 | 11.34435176 | 11.27215904 |
| Arhgap24  | 5.925272757 | 6.114833364 | 5.168191412 | 5.144831462 | 5.3361254   | 5.776850189 |
| Arhgap26  | 6.87268094  | 6.761653322 | 6.415292686 | 6.814662667 | 7.27527434  | 7.158615784 |
| Arhgap28  | 7.43967799  | 7.375115526 | 6.466552201 | 6.917832351 | 6.86434863  | 6.317866116 |
| Arhgap32  | 10.16540296 | 10.169952   | 10.45638715 | 10.23694963 | 10.20720808 | 10.30043917 |
| Arhgap33  | 9.415617687 | 9.198360365 | 9.769057672 | 9.713576389 | 9.289464962 | 9.832607787 |
| Arhgef10  | 7.825854568 | 7.447109957 | 7.45014572  | 7.5993972   | 7.412795491 | 6.899614759 |
| Arhgef15  | 6.211215576 | 6.699520106 | 5.683462387 | 6.773989117 | 6.7695529   | 6.605620608 |

|          |             |             |             |             |             |             |
|----------|-------------|-------------|-------------|-------------|-------------|-------------|
| Arhgef28 | 7.176060468 | 7.079996201 | 7.18531667  | 7.426478983 | 7.446614287 | 7.034919655 |
| Arhgef39 | 6.720197947 | 6.484757804 | 6.587257783 | 6.146587985 | 5.953055368 | 5.159929718 |
| Arid1a   | 11.16118733 | 11.08134022 | 11.63343018 | 11.19332615 | 11.13775534 | 11.42550007 |
| Arid2    | 11.04186084 | 10.98556173 | 11.22545365 | 11.01937233 | 11.08146453 | 11.04853385 |
| Arid4a   | 9.10873727  | 9.13940388  | 9.230918434 | 9.060646649 | 9.073778625 | 9.219940381 |
| Arid4b   | 10.37401104 | 10.18784298 | 10.45638715 | 10.307522   | 10.34658103 | 10.37247734 |
| Arl5b    | 9.361650651 | 9.23636736  | 9.313731426 | 9.166571642 | 9.111162273 | 9.034561557 |
| Armc6    | 7.668055912 | 7.83754723  | 7.572175032 | 7.426478983 | 7.506628612 | 7.726871747 |
| Armc8    | 9.579727749 | 9.537179172 | 9.51887733  | 9.467971694 | 9.663560816 | 9.688673104 |
| Armcx3   | 7.622889029 | 7.605548371 | 7.411429183 | 7.568018935 | 7.715237468 | 7.686333379 |
| Armcx4   | 11.07734673 | 10.96165347 | 11.21799445 | 11.06854974 | 11.04006597 | 11.16375248 |
| Armt1    | 6.573608143 | 6.744172339 | 7.090467934 | 6.4517769   | 6.705814869 | 6.56147301  |
| Arnt     | 8.340100329 | 8.422426187 | 8.633479495 | 8.697204558 | 8.527928886 | 8.744931943 |
| Arpc4    | 8.624172134 | 8.714896838 | 8.479790635 | 8.448540874 | 8.432706266 | 8.642701895 |
| Arpp19   | 9.817538457 | 9.818690855 | 9.973364629 | 9.868101382 | 10.0908379  | 9.997011024 |
| Arpp21   | 8.955494197 | 9.349069385 | 9.154828502 | 9.310982162 | 9.306447684 | 9.625750677 |
| Arrdc1   | 5.307880412 | 5.796508198 | 6.127499866 | 4.863970092 | 5.043777717 | 5.099463222 |
| Arx      | 8.504762638 | 8.354927372 | 8.736265233 | 8.395900718 | 8.150971694 | 8.33049125  |
| Asap1    | 8.902145364 | 8.810379461 | 8.908337734 | 8.976512044 | 9.070167232 | 8.981101413 |
| Asb1     | 8.510973767 | 8.40306312  | 8.112393197 | 8.345899565 | 8.614776899 | 8.221228213 |
| Asb7     | 8.495395517 | 8.543586049 | 7.995101547 | 8.391426095 | 8.287863066 | 8.148482721 |
| Ascl1    | 7.94990973  | 7.600699962 | 8.088049603 | 7.435200555 | 7.342682475 | 7.655164122 |
| Asic4    | 8.485967179 | 8.284114845 | 7.789047758 | 7.880530849 | 7.778569541 | 7.77599356  |
| Aspm     | 10.62441776 | 10.3315738  | 10.54549957 | 10.23445344 | 10.19979048 | 10.17236694 |
| Astn1    | 11.0273101  | 11.16089757 | 11.20861589 | 11.11813846 | 11.23328962 | 11.24537551 |
| Astn2    | 8.638426655 | 8.784959135 | 8.435454165 | 8.711634609 | 8.495984171 | 8.658505892 |
| Atad2    | 9.727061956 | 9.474954273 | 9.971147811 | 9.628678515 | 9.460602681 | 9.514368358 |
| Atad5    | 9.215279113 | 9.129339236 | 9.444125024 | 9.284681817 | 9.093481296 | 9.180349186 |
| Atf2     | 10.09995437 | 10.03988071 | 10.13259396 | 10.02365607 | 10.19067242 | 10.21751902 |
| Atf7ip   | 10.31488848 | 10.31686776 | 10.58372685 | 10.25676518 | 10.23004415 | 10.41030569 |
| Atg13    | 7.471874817 | 7.323081463 | 7.215596043 | 7.5993972   | 7.318533265 | 7.3781203   |
| Atn1     | 7.870014287 | 7.643759998 | 8.989435741 | 8.591938723 | 7.710605559 | 8.730051656 |
| Atoh1    | 2.904029779 | 3.712393585 | 1           | 2.030760869 | 2.230948887 | 4.494694577 |
| Atox1    | 7.168221945 | 7.225672326 | 7.13867163  | 6.867169543 | 6.847569902 | 6.951852343 |
| Atp11c   | 10.29252832 | 10.13012949 | 10.18709348 | 10.21938491 | 10.22518105 | 10.16869298 |
| Atp13a5  | 3.047666507 | 2.853470894 | 3.031034773 | 3.045898796 | 3.514815644 | 3.433590479 |
| Atp1b1   | 8.431343825 | 8.299156817 | 7.86742339  | 8.426840409 | 8.46606685  | 8.356561279 |
| Atp2b3   | 7.222217761 | 7.369425779 | 6.632847408 | 7.059947778 | 7.348657141 | 7.230864661 |
| Atp2b4   | 9.178682637 | 9.147737777 | 9.320712856 | 9.364471618 | 9.259651908 | 9.396806029 |
| Atp5b    | 12.53378521 | 12.52836182 | 12.46944764 | 12.39149321 | 12.35645377 | 12.29746098 |
| Atp5e    | 8.638426655 | 8.598121708 | 7.857856143 | 8.099345118 | 8.378255139 | 8.263177516 |
| Atp5g2   | 8.158156364 | 8.337547416 | 8.435454165 | 8.317877694 | 8.150971694 | 7.823497767 |
| Atp5l    | 8.07675356  | 8.08326439  | 7.758523245 | 7.630107498 | 7.742720901 | 7.756545074 |
| Atp5o    | 9.871635762 | 9.906763876 | 9.804351901 | 9.868101382 | 9.798450906 | 9.724149156 |
| Atp6ap2  | 9.024413216 | 8.878060416 | 8.650203623 | 8.91860355  | 8.990251947 | 8.894780508 |
| Atp6v0b  | 9.017885688 | 9.004582591 | 8.971803824 | 9.054999172 | 8.939692011 | 8.845006077 |
| Atp6v0e2 | 8.925583285 | 9.000907218 | 8.822408023 | 8.822156023 | 8.9076739   | 8.989456097 |

|               |             |             |             |             |             |             |
|---------------|-------------|-------------|-------------|-------------|-------------|-------------|
| Atp6v1g2      | 5.4177436   | 5.318260347 | 5.448709844 | 6.146587985 | 5.696185499 | 6.088214528 |
| Atp8a1        | 10.20137372 | 10.22454946 | 10.06352273 | 10.20415732 | 10.31030333 | 10.24394716 |
| Atp9a         | 10.76747351 | 10.85117267 | 10.71139684 | 10.75690583 | 10.79682988 | 10.83334721 |
| Atrx          | 12.35478941 | 12.39802216 | 12.46196802 | 12.47236863 | 12.46322377 | 12.59817502 |
| Atxn2l        | 9.500785374 | 9.571036186 | 9.979994716 | 9.752478876 | 9.405781861 | 9.647031206 |
| Atxn7         | 8.421485998 | 8.328778287 | 8.655735526 | 8.678961627 | 8.477017792 | 8.538376983 |
| AU041133      | 7.722595849 | 7.671768861 | 7.398289287 | 7.614834063 | 7.715237468 | 7.601670527 |
| Aunip         | 4.533375098 | 4.388824542 | 4.123905703 | 4.053408608 | 3.597423784 | 2.976330056 |
| Aut2          | 10.86039838 | 10.93107927 | 11.32689172 | 11.08941923 | 10.97251149 | 11.2145261  |
| Avil          | 5.615166341 | 5.616073469 | 4.738542537 | 3.85969309  | 3.011219987 | 5.327464956 |
| Avl9          | 10.71463499 | 10.63641991 | 10.66689048 | 10.60672955 | 10.70840968 | 10.66100715 |
| AW011738      | 6.698592606 | 6.128372165 | 6.655113117 | 6.644599561 | 5.786986288 | 5.814955531 |
| AW549542      | 1.476947654 | 1.985596612 | 1           | 1           | 1.418787199 | 2.303023309 |
| AW549877      | 9.564878237 | 9.512868417 | 9.581251927 | 9.411636119 | 9.688507808 | 9.606869186 |
| AW551984      | 9.153097115 | 9.40158529  | 9.041074296 | 9.301473782 | 9.457841459 | 9.41862471  |
| Azin1         | 10.67715236 | 10.70183555 | 10.6517446  | 10.71095955 | 10.68321649 | 10.77292316 |
| B230307C23Rik | 5.615166341 | 5.4098024   | 5.287019574 | 4.963790449 | 5.451659813 | 5.888273572 |
| B230323A14Rik | 2.904029779 | 4.295897557 | 4.359090506 | 2.625832949 | 3.597423784 | 3.433590479 |
| B3galt1       | 8.197197736 | 8.47370958  | 8.498382661 | 8.215279243 | 8.604826709 | 8.637395189 |
| B3gat2        | 6.62031939  | 6.886415994 | 6.563911094 | 7.071182259 | 7.123249702 | 7.082557119 |
| B3gnt5        | 9.640478591 | 9.56979629  | 9.54594017  | 9.594048355 | 9.640611889 | 9.223486283 |
| B3gnt9        | 5.188956249 | 5.169039459 | 5.342954171 | 5.305666106 | 4.557986608 | 5.852080256 |
| B430212C06Rik | 2.904029779 | 3.56087634  | 2.346809092 | 1.605542449 | 1.418787199 | 1           |
| B4galnt3      | 2.121272526 | 1           | 1           | 2.358763209 | 2.230948887 | 1           |
| Bach2         | 9.863163908 | 9.886987899 | 10.24144959 | 10.13088956 | 10.08548125 | 10.07366486 |
| Baiap2l1      | 5.638047729 | 6.207040629 | 6.249587406 | 5.517598924 | 5.638828837 | 5.524302751 |
| Baz2a         | 9.816285087 | 9.664605568 | 10.05308042 | 9.768096041 | 9.601116298 | 9.595967765 |
| Baz2b         | 11.21115701 | 11.17930705 | 11.34754754 | 11.13027382 | 11.13947952 | 11.15913101 |
| BC004004      | 7.968082659 | 8.090199423 | 7.838529183 | 8.049094748 | 8.04825021  | 7.97422651  |
| BC024978      | 4.581385593 | 5.516621281 | 5.847135518 | 5.057148905 | 4.67673177  | 5.273752905 |
| BC029214      | 6.803522181 | 7.180896481 | 6.761561469 | 6.801231826 | 7.022204154 | 6.808115555 |
| BC037032      | 3.298059683 | 3.199693499 | 3.280577348 | 4.224165625 | 5.043777717 | 3.433590479 |
| BC037034      | 8.322551313 | 8.433375223 | 8.307755651 | 8.121128854 | 8.204663426 | 8.350087804 |
| BC037704      | 3.298059683 | 4.433135735 | 2.346809092 | 3.635872179 | 3.9516001   | 2.976330056 |
| Bcam          | 6.066909744 | 5.270214764 | 5.342954171 | 4.51488159  | 4.888396012 | 4.671251885 |
| Bcap29        | 6.083675251 | 6.030818731 | 5.396800833 | 5.866103848 | 6.474034446 | 6.710417912 |
| Bccip         | 7.303184965 | 7.28731932  | 7.500202711 | 7.199585062 | 7.230678103 | 7.018684418 |
| Bcl11a        | 10.50736133 | 10.58087976 | 11.0422497  | 10.70646354 | 10.78365934 | 10.85751038 |
| Bcl11b        | 10.85857299 | 10.8884503  | 11.32168122 | 11.01501575 | 10.98119092 | 11.15913101 |
| Bcl2l12       | 6.314253981 | 5.926187346 | 6.362144593 | 5.702349231 | 5.733194373 | 6.024597402 |
| Bcl9          | 9.086035146 | 9.010078155 | 9.649383748 | 9.325128254 | 9.08813447  | 9.482168117 |
| Bclaf1        | 11.68933786 | 11.82411337 | 11.82666253 | 11.78791392 | 11.67789652 | 11.73531428 |
| Bcorl1        | 7.874838514 | 7.986224415 | 8.167646663 | 8.08278871  | 7.769690545 | 7.965782904 |
| Bdh1          | 8.960041328 | 9.108996827 | 9.107170597 | 8.927902946 | 9.145887143 | 8.976905857 |
| Bend6         | 6.449751263 | 6.854186607 | 6.917057967 | 6.954695048 | 7.059109572 | 6.881773285 |
| Bhlhe22       | 8.42477943  | 8.726070861 | 8.772360819 | 8.457130482 | 8.572006308 | 8.689603805 |
| Bicd1         | 10.12952191 | 10.07001067 | 10.27058506 | 10.17321133 | 10.33534193 | 10.24743462 |



|               |             |             |             |             |             |             |
|---------------|-------------|-------------|-------------|-------------|-------------|-------------|
| Blm           | 8.538597609 | 8.322902449 | 8.822408023 | 8.444226815 | 8.410029451 | 8.375809226 |
| Blmh          | 9.572322099 | 9.611366203 | 9.469475264 | 9.322780184 | 9.280116701 | 8.916849748 |
| Bloc1s1       | 7.668055912 | 7.694701238 | 7.950788095 | 7.527811331 | 7.318533265 | 7.62330656  |
| Bmf           | 7.617142431 | 7.352220649 | 7.385028612 | 7.126078702 | 7.014708414 | 7.326295136 |
| Bmi1          | 9.988638917 | 9.862893243 | 10.01914784 | 9.952537727 | 9.902637634 | 9.954969208 |
| Bmpr1a        | 10.02706761 | 9.848649922 | 10.01269567 | 9.926485008 | 9.974912761 | 9.882804426 |
| Bmpr2         | 11.51489378 | 11.4195294  | 11.64876853 | 11.46969612 | 11.59173019 | 11.53442813 |
| Bora          | 7.605580105 | 7.386428141 | 7.673818665 | 7.239966139 | 7.150866018 | 7.216701442 |
| Bphl          | 6.180371882 | 6.505657584 | 6.698639411 | 6.399256858 | 6.324421177 | 6.605620608 |
| Bptf          | 11.53446228 | 11.57993753 | 11.76145325 | 11.59902837 | 11.55344298 | 11.66273018 |
| Brca1         | 9.000333165 | 8.789227082 | 8.777444392 | 8.660485057 | 8.668309087 | 8.163328226 |
| Brca2         | 9.28217264  | 9.237929461 | 9.208509841 | 9.099571837 | 9.08813447  | 9.026464761 |
| Brd3          | 10.3403994  | 10.24022205 | 10.50776197 | 10.19648283 | 10.28715761 | 10.3221001  |
| Brd4          | 9.323341477 | 9.142743218 | 9.975578045 | 9.615309828 | 9.246912362 | 9.746502994 |
| Brd8          | 10.37741453 | 10.52631505 | 10.35631884 | 10.30870899 | 10.24533673 | 10.15204339 |
| Brinp1        | 7.954474468 | 8.107392546 | 8.003803213 | 8.26993005  | 8.102294222 | 8.497956714 |
| Brix1         | 7.634314007 | 7.53614148  | 8.152074704 | 7.997030751 | 8.211236542 | 8.079720074 |
| Brox          | 9.665751439 | 9.733774172 | 9.595713829 | 9.607614589 | 9.681424005 | 9.623068404 |
| Brwd3         | 9.269406189 | 9.333080634 | 9.317226364 | 9.409424811 | 9.116424586 | 8.955743083 |
| Btbd19        | 3.408645243 | 4.03344674  | 4.246285218 | 3.509431521 | 3.427188559 | 3.22300096  |
| Btf3          | 10.35945599 | 10.38118892 | 10.29383188 | 10.25307044 | 10.35995338 | 10.23343393 |
| Btg1          | 9.731058151 | 9.715949979 | 9.862917238 | 9.680947854 | 9.800631903 | 9.982435339 |
| Btg2          | 9.296625865 | 8.999066014 | 9.271118136 | 8.825477013 | 8.641791272 | 8.955743083 |
| Bub1          | 9.037380331 | 8.8800626   | 8.998171545 | 8.711634609 | 8.866625371 | 8.432058627 |
| Bub3          | 9.412303249 | 9.425087857 | 9.660432676 | 9.233100394 | 9.22920975  | 9.139640778 |
| Bzrap1        | 10.14058055 | 10.20631296 | 10.17173113 | 10.22190728 | 10.22842494 | 10.36767829 |
| C130030K03Rik | 6.803522181 | 6.42017804  | 6.388963369 | 6.773989117 | 7.217678952 | 7.244890188 |
| C130071C03Rik | 9.41396142  | 9.13940388  | 9.51887733  | 9.301473782 | 9.338324395 | 9.505657507 |
| C1qtnf4       | 7.420009252 | 7.770052417 | 7.274312476 | 7.568018935 | 7.007173525 | 7.50008031  |
| C230091D08Rik | 9.806218728 | 9.931108628 | 9.751081396 | 9.928030614 | 9.943675271 | 10.06973039 |
| C330006A16Rik | 6.901334763 | 6.986450479 | 7.512450212 | 7.025709693 | 6.474034446 | 6.863708404 |
| C330027C09Rik | 8.96230953  | 8.655354339 | 8.856435913 | 8.435559803 | 8.687293155 | 8.363005837 |
| C530008M17Rik | 10.59109354 | 10.49006876 | 10.99502479 | 10.45418134 | 10.44815685 | 10.76686071 |
| C77370        | 10.27985358 | 10.61072682 | 10.26878123 | 10.43147688 | 10.59988382 | 10.70225328 |
| Cacna1b       | 10.50191441 | 10.60347423 | 10.52901651 | 10.50684347 | 10.65516699 | 10.67790586 |
| Cacna1d       | 8.638426655 | 8.765595566 | 8.599438142 | 8.778272729 | 9.04094595  | 9.090001383 |
| Cacna1e       | 10.57784118 | 10.77574951 | 10.71669943 | 10.62875706 | 10.8483416  | 10.91016676 |
| Cacna1h       | 10.1791192  | 10.15762513 | 10.14837646 | 10.01931242 | 10.06657479 | 10.33527003 |
| Cacnb4        | 8.861405641 | 8.82708087  | 8.812536511 | 9.026425344 | 8.841423683 | 9.169360322 |
| Cadm1         | 10.57562057 | 10.58333953 | 10.54698873 | 10.59218043 | 10.7147844  | 10.69588579 |
| Cadm2         | 9.256525758 | 9.294569385 | 9.385403919 | 9.310982162 | 9.679054987 | 9.905056218 |
| Cadps         | 11.00932422 | 11.04744531 | 10.878028   | 10.88179031 | 10.98886238 | 10.90244508 |
| Calb2         | 6.752011146 | 7.015885123 | 6.781940076 | 6.85422089  | 7.14401134  | 7.034919655 |
| Calca         | 1.476947654 | 2.56572585  | 3.678570668 | 3.217496026 | 2.594940123 | 3.617319577 |
| Calm1         | 12.30405197 | 12.27350808 | 12.14105547 | 12.18076653 | 12.25751323 | 12.27585105 |
| Calm2         | 11.9256221  | 11.88868381 | 11.98720491 | 11.88977659 | 11.88735113 | 11.87149837 |
| Calr          | 11.26589524 | 11.53330974 | 11.52502048 | 11.13228649 | 10.96134457 | 11.06740115 |

|          |             |             |             |             |             |             |
|----------|-------------|-------------|-------------|-------------|-------------|-------------|
| Camk2b   | 8.836892448 | 9.117507716 | 8.949456506 | 9.023536586 | 9.25010781  | 9.322700134 |
| Camk2n2  | 6.449751263 | 6.812860216 | 6.220020382 | 7.08232993  | 6.86434863  | 6.917238285 |
| Camk4    | 8.231453863 | 8.808278125 | 8.220861814 | 8.56834659  | 8.854079556 | 8.793452825 |
| Camkk2   | 9.000333165 | 8.95225525  | 8.962906393 | 8.902970099 | 8.756338204 | 9.006021706 |
| Camkv    | 7.628612828 | 7.921597309 | 7.572175032 | 7.469568968 | 7.774136874 | 7.905252094 |
| Camsap1  | 11.21686773 | 11.14932308 | 11.19728054 | 11.22384817 | 11.25651438 | 11.29508825 |
| Camsap2  | 11.38734398 | 11.48972106 | 11.46011013 | 11.41673568 | 11.52041123 | 11.58008989 |
| Camta1   | 10.41681535 | 10.43325085 | 10.59240651 | 10.42163595 | 10.37759254 | 10.44413135 |
| Capn2    | 9.312714524 | 9.377693499 | 9.189566409 | 9.40277048  | 9.132097329 | 9.180349186 |
| Capn6    | 6.449751263 | 5.894843895 | 5.639468694 | 5.517598924 | 5.579097119 | 5.923581073 |
| Capn7    | 9.929585375 | 9.94743148  | 9.781762102 | 10.00033733 | 9.866657544 | 10.01144092 |
| Capns2   | 3.607234804 | 3.913456893 | 2.72911076  | 3.217496026 | 3.9516001   | 2.976330056 |
| Caprin1  | 12.73373831 | 12.77720294 | 12.87035002 | 12.65378439 | 12.6368352  | 12.6990448  |
| Capzb    | 8.991476167 | 8.948443942 | 9.372023724 | 9.057825674 | 8.901590584 | 8.894780508 |
| Car10    | 6.984032096 | 7.079996201 | 6.93536751  | 7.336234532 | 7.412795491 | 7.244890188 |
| Car5b    | 3.781766418 | 3.56087634  | 3.678570668 | 4.302518316 | 3.675556897 | 4.752037851 |
| Casc4    | 9.875251383 | 9.812413986 | 9.758812957 | 10.08590467 | 10.01960038 | 10.02572792 |
| Casc5    | 9.83249458  | 9.644723124 | 9.939749302 | 9.588194975 | 9.602367043 | 9.548695143 |
| Cbln4    | 5.059341058 | 5.088211387 | 3.842769234 | 5.267106973 | 5.537856244 | 5.888273572 |
| Cbr4     | 5.726108215 | 5.878913056 | 5.807924923 | 5.343221434 | 5.359984332 | 5.923581073 |
| Cbx2     | 8.902145364 | 8.863966783 | 8.83221245  | 8.715219683 | 8.493289907 | 8.621356935 |
| Cbx5     | 12.86576121 | 12.79800167 | 12.97611142 | 12.7915444  | 12.78999795 | 12.6888205  |
| Cc2d1a   | 8.003755861 | 7.886173697 | 8.272183702 | 8.137253483 | 8.051916815 | 8.235347278 |
| Ccar1    | 10.38504313 | 10.55354176 | 10.85536982 | 10.45739586 | 10.48727213 | 10.53825069 |
| Ccdc102a | 5.925272757 | 6.045165342 | 5.76761879  | 5.96578166  | 5.516785121 | 6.056756594 |
| Ccdc106  | 6.299977155 | 6.5465702   | 6.516052763 | 6.502451963 | 6.287574716 | 6.444805259 |
| Ccdc112  | 6.720197947 | 6.993865632 | 7.057413452 | 7.199585062 | 7.087968895 | 7.018684418 |
| Ccdc124  | 8.347060598 | 8.302146483 | 8.356127376 | 8.002909297 | 7.851912933 | 7.69657526  |
| Ccdc138  | 6.573608143 | 6.474193269 | 6.610232669 | 6.644599561 | 6.171028365 | 6.291080771 |
| Ccdc149  | 5.962006808 | 6.101166306 | 6.388963369 | 6.013151561 | 6.569213246 | 6.395361653 |
| Ccdc150  | 3.178288549 | 3.298813141 | 3.031034773 | 3.045898796 | 2.424393538 | 2.303023309 |
| Ccdc159  | 5.519829329 | 5.57711136  | 5.287019574 | 6.059015424 | 6.101966287 | 6.178670863 |
| Ccdc166  | 6.383592769 | 6.317541758 | 6.415292686 | 5.61292943  | 6.157477901 | 6.149144468 |
| Ccdc184  | 7.244754184 | 7.250648107 | 7.057413452 | 7.417704365 | 7.330658399 | 7.415802885 |
| Ccdc23   | 8.038568223 | 7.894121119 | 7.905070272 | 7.801789279 | 7.933681068 | 8.023875973 |
| Ccdc30   | 6.720197947 | 6.804450958 | 6.953447591 | 7.025709693 | 6.961118584 | 7.464562498 |
| Ccdc34   | 8.10986786  | 8.244255536 | 8.314765989 | 7.955196258 | 7.933681068 | 7.832813749 |
| Ccdc55   | 7.237281091 | 7.369425779 | 7.68468273  | 7.583793375 | 7.150866018 | 7.143721456 |
| Ccdc66   | 8.437878486 | 8.60540119  | 8.62222139  | 8.426840409 | 8.446700378 | 8.256270125 |
| Ccdc71l  | 8.223911375 | 8.374942853 | 8.286517902 | 8.255229413 | 8.201365602 | 8.04807432  |
| Ccdc77   | 6.992934773 | 6.971504846 | 7.288625645 | 7.08232993  | 6.538179474 | 6.178670863 |
| Ccdc8    | 6.843446461 | 6.795992396 | 6.698639411 | 6.760172391 | 6.60957971  | 6.344163211 |
| Ccdc80   | 5.887578888 | 6.257199856 | 5.594091143 | 6.208946435 | 5.872409042 | 5.991704972 |
| Ccdc85a  | 7.206995492 | 7.16784392  | 7.344499199 | 7.126078702 | 7.495900972 | 7.173357913 |
| Ccdc88a  | 11.88584793 | 11.85217744 | 11.79505306 | 11.7660442  | 11.81124237 | 11.81444835 |
| Ccl27a   | 7.558381255 | 7.615196579 | 8.038094343 | 7.288903163 | 7.177963611 | 7.3781203   |
| Ccm2     | 7.879646662 | 7.757037911 | 7.424450483 | 7.452487101 | 7.389801017 | 7.655164122 |

|          |             |             |             |             |             |             |
|----------|-------------|-------------|-------------|-------------|-------------|-------------|
| Ccna2    | 9.99972339  | 9.770934841 | 10.03621389 | 9.662496867 | 9.674305249 | 9.636430179 |
| Ccnd1    | 9.96394909  | 9.731558154 | 9.997527416 | 9.920285973 | 9.556642763 | 9.587737299 |
| Ccnd2    | 12.10851548 | 11.90819146 | 12.51885064 | 12.19880481 | 12.17501568 | 12.13044351 |
| Ccnd3    | 7.628612828 | 7.386428141 | 7.706168466 | 7.178962608 | 6.999599076 | 7.128671755 |
| Ccnk     | 7.35243993  | 7.520823978 | 8.128397009 | 7.399993384 | 7.479658448 | 7.47649919  |
| Ccrl2    | 2.565099681 | 1.725454411 | 3.031034773 | 2.358763209 | 2.007489679 | 2.303023309 |
| Ccser2   | 10.25601521 | 10.39665611 | 10.36647518 | 10.35999292 | 10.45093666 | 10.47569607 |
| Cd34     | 8.113954211 | 7.898078472 | 8.279368605 | 7.711337936 | 7.533103826 | 7.676018269 |
| Cd55     | 5.391052138 | 4.433135735 | 4.359090506 | 4.51488159  | 4.638225882 | 2.976330056 |
| Cd63     | 5.768201518 | 5.596723939 | 5.448709844 | 6.013151561 | 5.451659813 | 5.477553384 |
| Cd9      | 6.116632854 | 5.709109819 | 5.683462387 | 5.813557456 | 5.937282724 | 5.991704972 |
| Cdc14a   | 8.042861293 | 7.770052417 | 7.673818665 | 7.527811331 | 7.538341062 | 7.286166751 |
| Cdc23    | 9.838680826 | 9.875994443 | 10.04888224 | 9.780126914 | 9.607359206 | 9.528770572 |
| Cdc25b   | 8.51715827  | 8.278053866 | 8.314765989 | 7.991128155 | 8.123357421 | 7.676018269 |
| Cdc25c   | 7.206995492 | 6.963973565 | 6.879726671 | 7.189310683 | 7.150866018 | 6.826885538 |
| Cdc37    | 9.222866747 | 9.293067455 | 9.320712856 | 9.014835446 | 8.982587896 | 8.981101413 |
| Cdc40    | 7.668055912 | 7.525947903 | 7.548580966 | 7.89324653  | 7.80053086  | 7.756545074 |
| Cdc42ep5 | 3.298059683 | 3.638623163 | 3.678570668 | 2.625832949 | 2.747440291 | 2.976330056 |
| Cdc45    | 7.490853563 | 7.419843296 | 7.673818665 | 7.249887243 | 7.204561609 | 7.018684418 |
| Cdc73    | 8.150219688 | 7.816792302 | 8.10432422  | 8.049094748 | 8.062861048 | 7.860406105 |
| Cdca3    | 8.598153606 | 8.505184331 | 8.79258851  | 8.564376785 | 8.34874928  | 8.023875973 |
| Cdca4    | 8.829456528 | 8.655354339 | 8.822408023 | 8.507621095 | 8.372402046 | 8.148482721 |
| Cdca7    | 9.30915474  | 9.199964143 | 9.51583877  | 9.006081509 | 9.105880695 | 8.826471886 |
| Cdca7l   | 6.383592769 | 6.375460809 | 6.388963369 | 6.036265739 | 5.855724339 | 5.814955531 |
| Cdca8    | 8.025611828 | 7.820967243 | 7.941759697 | 7.924553886 | 7.589693592 | 7.644622906 |
| Cdcp1    | 1.476947654 | 1           | 1           | 1           | 1           | 1           |
| Cdh1     | 3.697138272 | 4.03344674  | 1.825170741 | 3.370835508 | 4.286420738 | 5.159929718 |
| Cdh13    | 8.357438441 | 8.710402883 | 8.704590692 | 8.740068806 | 8.649071877 | 8.872368419 |
| Cdh3     | 3.298059683 | 3.849499474 | 3.493254909 | 2.851100857 | 3.9516001   | 4.494694577 |
| Cdh4     | 9.598806396 | 9.652943224 | 9.819217623 | 9.741972715 | 9.7896938   | 9.957100652 |
| Cdk1     | 9.039530231 | 8.911725319 | 8.851623649 | 8.743583998 | 8.651490603 | 8.363005837 |
| Cdk11b   | 8.47647682  | 8.636527945 | 8.7310342   | 8.729471547 | 8.389890565 | 8.704904948 |
| Cdk12    | 10.26798364 | 10.29976838 | 10.39486917 | 10.43365467 | 10.28014086 | 10.25438434 |
| Cdk17    | 10.09892391 | 10.11830448 | 9.935207493 | 10.16929599 | 10.17478603 | 10.15204339 |
| Cdk2     | 7.785433554 | 7.56629706  | 7.968677139 | 7.435200555 | 7.287766956 | 6.968852843 |
| Cdk2ap1  | 8.691344626 | 8.394684441 | 8.741477367 | 8.205116419 | 8.214511904 | 8.192568664 |
| Cdk4     | 11.40329224 | 11.3504483  | 11.51516388 | 11.27332567 | 11.16213249 | 11.09476344 |
| Cdk5r1   | 11.29633055 | 11.29036664 | 11.27930557 | 11.22699073 | 11.31832915 | 11.38491005 |
| Cdk5rap1 | 6.513008451 | 5.878913056 | 6.249587406 | 5.673154141 | 5.495401678 | 5.379248858 |
| Cdk5rap2 | 9.91209162  | 9.80716232  | 10.18518211 | 9.63626251  | 9.707229643 | 9.763652969 |
| Cdk8     | 8.966835264 | 9.030051325 | 9.274717714 | 9.132120267 | 9.156143688 | 9.054606944 |
| Cdkl1    | 4.077947413 | 4.247088592 | 3.990174756 | 4.224165625 | 4.557986608 | 4.970351389 |
| Cdkn1b   | 9.555894607 | 9.494689396 | 9.607179872 | 9.378105258 | 9.298753038 | 9.47027843  |
| Cdkn1c   | 10.47277685 | 10.38894324 | 10.12463749 | 10.31462937 | 10.03450276 | 10.16685248 |
| Cdo1     | 8.072560314 | 8.07279893  | 8.128397009 | 8.255229413 | 8.240450495 | 7.97422651  |
| Cdon     | 10.94196327 | 10.79815818 | 11.06008953 | 10.74292373 | 10.71362746 | 10.69970965 |
| Cdr1     | 5.336140447 | 5.294437552 | 6.334817815 | 6.229147667 | 5.638828837 | 6.56147301  |

|          |             |             |             |             |             |             |
|----------|-------------|-------------|-------------|-------------|-------------|-------------|
| Cds2     | 10.40519104 | 10.42847045 | 10.35461914 | 10.37593551 | 10.43277146 | 10.42885429 |
| Cdt1     | 7.50336876  | 7.180896481 | 7.122782017 | 7.025709693 | 6.287574716 | 6.899614759 |
| Cdv3     | 10.27529977 | 10.23240704 | 10.25791063 | 10.22442526 | 10.12691884 | 9.898416643 |
| Cdyl2    | 6.654386342 | 6.878425895 | 6.610232669 | 7.115265253 | 7.014708414 | 7.352440416 |
| Ceacam14 | 1           | 1           | 1           | 1           | 1           | 1.793876829 |
| Celf2    | 11.68247531 | 11.73233901 | 11.89256974 | 11.80189028 | 11.91856375 | 11.89281084 |
| Celf4    | 11.03433433 | 11.04699984 | 11.1500474  | 11.15490267 | 11.09040605 | 11.16743902 |
| Celf5    | 9.31980785  | 9.220652613 | 9.663181737 | 9.478557728 | 9.303374749 | 9.775779323 |
| Cemip    | 6.823622422 | 6.526258914 | 6.563911094 | 5.730965216 | 6.648847398 | 5.991704972 |
| Cenpa    | 8.105769901 | 7.894121119 | 8.328685292 | 7.689633874 | 7.673004987 | 7.511727889 |
| Cenpe    | 10.15155506 | 9.906763876 | 10.27957053 | 9.958600006 | 9.904666785 | 9.683533126 |
| Cenpf    | 11.14879319 | 10.88147125 | 11.23564748 | 10.90630478 | 10.80228231 | 10.60773381 |
| Cenpj    | 8.275899006 | 8.259716638 | 8.593685665 | 8.142588557 | 8.073722884 | 8.04807432  |
| Cenpo    | 6.843446461 | 7.079996201 | 6.988941883 | 6.978757094 | 6.558942651 | 6.710417912 |
| Cenpu    | 6.356255846 | 6.244822593 | 6.028636913 | 5.96578166  | 5.383455101 | 5.888273572 |
| Cep112   | 8.113954211 | 8.012016409 | 7.886369626 | 8.060413729 | 7.817862347 | 7.940151466 |
| Cep120   | 9.594425972 | 9.549811637 | 9.62420986  | 9.542512203 | 9.588548851 | 9.633767706 |
| Cep128   | 7.825854568 | 7.473870828 | 7.673818665 | 7.426478983 | 7.463230973 | 7.313042641 |
| Cep152   | 8.17389992  | 8.040939186 | 8.038094343 | 7.443869719 | 7.905586346 | 7.601670527 |
| Cep250   | 9.858300417 | 9.839418683 | 10.09032423 | 9.78695692  | 9.633288357 | 9.680956253 |
| Cep55    | 7.912862362 | 7.541211386 | 7.86742339  | 7.426478983 | 7.696619933 | 7.244890188 |
| Cep57    | 8.685864841 | 8.530898714 | 8.389711842 | 8.507621095 | 8.493289907 | 8.206969603 |
| Cep83os  | 5.868356087 | 5.813370024 | 5.807924923 | 5.673154141 | 5.579097119 | 5.217963548 |
| Cep85    | 8.064137081 | 7.993640727 | 7.828767736 | 7.795029296 | 7.769690545 | 7.415802885 |
| Cers4    | 8.047141625 | 8.12775743  | 7.995101547 | 8.503480383 | 8.354698925 | 8.087524227 |
| Cfap126  | 3.781766418 | 2.397010683 | 4.46371154  | 2.625832949 | 2.230948887 | 1           |
| Cfap20   | 7.977083995 | 8.137833076 | 8.159881693 | 7.886902698 | 7.901527776 | 7.534744676 |
| Cfap44   | 7.266943973 | 7.571262274 | 6.563911094 | 7.503137658 | 7.47420338  | 7.726871747 |
| Chaf1a   | 8.304786199 | 8.34336403  | 8.683081269 | 8.194881497 | 8.098753595 | 8.110686546 |
| Chchd10  | 4.265963351 | 4.879886885 | 4.561255977 | 3.959799763 | 4.557986608 | 5.327464956 |
| Chchd2   | 9.708265277 | 9.668085967 | 9.437717247 | 9.329812962 | 9.429934629 | 9.384188441 |
| Chd1     | 10.2880144  | 10.16749503 | 10.1832682  | 10.13491039 | 10.07200196 | 10.09123837 |
| Chd2     | 10.8743168  | 10.82594794 | 11.11232243 | 10.81569803 | 10.75526625 | 10.76442858 |
| Chd4     | 12.49239981 | 12.42312802 | 12.67103221 | 12.4641359  | 12.34641173 | 12.46596643 |
| Chd5     | 9.821292049 | 10.06297767 | 10.00837813 | 10.11740529 | 10.05016967 | 10.33034538 |
| Chd6     | 11.52835167 | 11.52948808 | 11.58133383 | 11.54414984 | 11.56503621 | 11.54012665 |
| Chd7     | 11.35318112 | 11.27941007 | 11.55789029 | 11.32410022 | 11.17101073 | 11.22871059 |
| Chek1    | 7.37984857  | 7.180896481 | 7.651841978 | 7.399993384 | 7.116262226 | 6.951852343 |
| Cherp    | 8.343584661 | 7.925480107 | 8.782510115 | 8.331956663 | 8.116370468 | 8.350087804 |
| Chl1     | 11.61487873 | 11.8539612  | 11.65775604 | 11.77894885 | 11.93949814 | 12.06079445 |
| Chml     | 8.283175211 | 8.124383183 | 7.914330472 | 8.205116419 | 8.157793459 | 7.716843444 |
| Chmp2b   | 7.50958588  | 7.653156834 | 7.023583845 | 7.711337936 | 7.881061879 | 7.403351065 |
| Chmp6    | 8.089260662 | 8.008359949 | 8.183052337 | 7.936889044 | 7.527847509 | 7.716843444 |
| Chp1     | 8.658149292 | 8.47370958  | 8.661246298 | 8.426840409 | 8.658722546 | 8.955743083 |
| Chpf2    | 8.333106318 | 8.161072823 | 8.10432422  | 8.060413729 | 8.029776088 | 7.79518335  |
| Chrm1    | 4.323558214 | 3.712393585 | 3.990174756 | 4.224165625 | 4.516128927 | 5.697480352 |
| Chrna4   | 7.954474468 | 7.752673522 | 8.046541268 | 8.12652378  | 7.701296889 | 7.878512125 |

|          |             |             |             |             |             |             |
|----------|-------------|-------------|-------------|-------------|-------------|-------------|
| Chrn2    | 9.500785374 | 9.708082108 | 9.67684901  | 9.51192031  | 9.701405126 | 9.766086408 |
| Chrn3    | 1           | 1.40785378  | 1           | 1.605542449 | 1.742960444 | 3.22300096  |
| Chst14   | 4.533375098 | 4.814389099 | 4.246285218 | 4.053408608 | 4.920840026 | 5.656095563 |
| Chst15   | 8.034262341 | 8.144511291 | 8.369655123 | 8.279647909 | 8.36652511  | 8.509621381 |
| Cib2     | 5.591916194 | 5.956864296 | 4.738542537 | 6.125188133 | 5.495401678 | 6.207605066 |
| Cirbp    | 9.438607959 | 9.349069385 | 9.405244375 | 9.455165058 | 9.449525944 | 9.660173878 |
| Cisd2    | 8.272247095 | 8.319955531 | 8.56457411  | 8.250295724 | 8.477017792 | 8.235347278 |
| Cited2   | 7.465492678 | 7.473870828 | 7.72733891  | 7.511409191 | 7.336682964 | 7.655164122 |
| Ckap2l   | 8.261235569 | 8.296160943 | 8.479790635 | 8.317877694 | 7.953418955 | 8.125924044 |
| Ckb      | 11.87173922 | 11.72344557 | 11.81434907 | 11.54162801 | 11.47675061 | 11.42318913 |
| Clasp1   | 11.68899551 | 11.70690317 | 11.9036549  | 11.70244243 | 11.64489498 | 11.70456224 |
| Clasp2   | 11.73349802 | 11.76086981 | 11.69919621 | 11.7145833  | 11.78834616 | 11.72221502 |
| Cldn11   | 7.112126384 | 7.127962371 | 6.84140367  | 7.136811703 | 6.929577683 | 6.291080771 |
| Cldn3    | 1.834785459 | 2.56572585  | 3.493254909 | 3.045898796 | 2.885350385 | 4.397591105 |
| Cldn4    | 1.476947654 | 1           | 1           | 1           | 1           | 1           |
| Cldn6    | 1           | 1           | 1           | 1           | 1           | 1           |
| Cldn7    | 3.047666507 | 1.725454411 | 1.825170741 | 1.605542449 | 1.742960444 | 2.303023309 |
| Cldn9    | 2.904029779 | 1.725454411 | 1           | 2.358763209 | 1.418787199 | 1.793876829 |
| Clec11a  | 5.307880412 | 5.088211387 | 5.104893407 | 4.053408608 | 4.128701845 | 4.059575235 |
| Clec1a   | 2.904029779 | 3.56087634  | 2.346809092 | 3.752118759 | 3.234144523 | 5.379248858 |
| Clec1b   | 2.565099681 | 2.978340632 | 1.825170741 | 3.85969309  | 2.747440291 | 3.926671999 |
| Clec5a   | 1           | 1.985596612 | 1.825170741 | 1.605542449 | 1.742960444 | 1.793876829 |
| Clic4    | 10.23834234 | 10.15266474 | 10.35801654 | 10.1574858  | 10.08189907 | 10.02978406 |
| Clip3    | 8.819481972 | 8.801955689 | 9.127219725 | 9.230597528 | 8.778637937 | 9.390511029 |
| Clmn     | 6.585428507 | 6.232338222 | 6.632847408 | 6.208946435 | 6.348472847 | 6.934649122 |
| Clmp     | 9.054490487 | 9.270348829 | 9.115223714 | 9.223062771 | 9.387035356 | 9.322700134 |
| Clock    | 9.820041936 | 9.788096439 | 9.761380964 | 9.774983106 | 9.76421692  | 9.820951708 |
| Clspn    | 8.319015748 | 8.275013802 | 8.552762992 | 8.168971945 | 8.256428441 | 7.896393726 |
| Clstn2   | 7.860317166 | 7.882183508 | 7.77894451  | 7.936889044 | 8.333766926 | 8.310624842 |
| Clt      | 9.9808288   | 10.1543201  | 9.909968693 | 9.81395812  | 9.830824629 | 9.959228952 |
| Cmtm5    | 2.565099681 | 1.725454411 | 1           | 1.605542449 | 2.007489679 | 3.22300096  |
| Cnn2     | 7.413392962 | 7.086946925 | 7.106715447 | 7.037212907 | 6.872665379 | 6.985655341 |
| Cnot3    | 8.242694171 | 8.058725832 | 8.467261493 | 7.880530849 | 7.864477522 | 8.155924569 |
| Cnot6    | 11.08829188 | 10.9762331  | 11.08079899 | 11.11813846 | 11.12345167 | 11.05650807 |
| Cnpy1    | 6.328390908 | 5.956864296 | 2.72911076  | 5.941500387 | 5.984092579 | 6.178670863 |
| Cnpy3    | 7.800724456 | 7.917704031 | 7.68468273  | 7.760745934 | 7.584639817 | 7.390790838 |
| Cntn1    | 8.755528188 | 8.999066014 | 8.772360819 | 8.725921758 | 9.142452027 | 9.034561557 |
| Cntn2    | 11.67350491 | 11.80474475 | 11.80255313 | 11.68426603 | 11.70318198 | 11.88443559 |
| Cntn4    | 6.863001787 | 7.100748709 | 6.879726671 | 7.071182259 | 7.40708114  | 7.216701442 |
| Cntnap4  | 8.674842432 | 8.561162936 | 8.190693919 | 8.38693755  | 8.706030658 | 8.594223824 |
| Cntnap5a | 7.183856633 | 7.375115526 | 7.302798206 | 7.104370141 | 7.653830708 | 7.415802885 |
| Cntnap5b | 6.730880483 | 6.787483949 | 6.587257783 | 7.136811703 | 6.961118584 | 7.272538694 |
| Cntrl    | 9.76263536  | 9.942649782 | 9.838803268 | 9.785252448 | 9.663560816 | 9.628427973 |
| Cntrob   | 8.844290239 | 8.814572975 | 8.894366855 | 8.67159937  | 8.375331561 | 8.317277421 |
| Cobl     | 6.891846582 | 7.231956923 | 6.719919814 | 7.345517279 | 7.668235255 | 7.272538694 |
| Cog4     | 8.950932689 | 8.971162205 | 8.884977203 | 8.431206693 | 8.577104454 | 8.647989154 |
| Cog6     | 8.674842432 | 8.645971851 | 8.409493545 | 8.435559803 | 8.495984171 | 8.242355329 |

|          |             |             |             |             |             |             |
|----------|-------------|-------------|-------------|-------------|-------------|-------------|
| Cog8     | 7.800724456 | 7.845766313 | 7.959760344 | 7.382062272 | 7.501274763 | 7.706744944 |
| Col11a1  | 8.59230743  | 8.666997287 | 8.736265233 | 8.588033395 | 8.460560049 | 8.689603805 |
| Col11a2  | 6.772836778 | 6.870391298 | 6.781940076 | 6.760172391 | 6.299961727 | 6.5159317   |
| Col12a1  | 8.253847581 | 8.262789074 | 8.063288183 | 8.215279243 | 7.965133356 | 8.263177516 |
| Col13a1  | 4.916921051 | 4.343109123 | 4.561255977 | 4.640865717 | 3.675556897 | 3.926671999 |
| Col14a1  | 4.378941788 | 4.911553418 | 3.678570668 | 4.963790449 | 4.428584041 | 4.585672437 |
| Col16a1  | 5.591916194 | 6.030818731 | 5.994117534 | 6.249069934 | 5.579097119 | 6.263788702 |
| Col18a1  | 9.234173896 | 9.149398795 | 9.401956522 | 8.841968251 | 8.841423683 | 8.788673515 |
| Col1a1   | 9.073499928 | 8.915634741 | 8.6667361   | 8.940209624 | 8.798417175 | 8.93858647  |
| Col1a2   | 9.889623929 | 9.73709183  | 9.560758579 | 9.855161127 | 9.73941939  | 9.721643881 |
| Col25a1  | 7.940736694 | 7.862065325 | 7.86742339  | 7.568018935 | 7.881061879 | 7.79518335  |
| Col26a1  | 7.56436625  | 7.16784392  | 7.200535793 | 7.279247656 | 6.905461074 | 7.128671755 |
| Col27a1  | 5.544260695 | 5.813370024 | 6.362144593 | 5.813557456 | 5.311865251 | 5.327464956 |
| Col2a1   | 9.440236187 | 9.231670883 | 9.421572173 | 9.083018045 | 8.868705774 | 9.316072571 |
| Col3a1   | 11.08256907 | 10.99159315 | 11.09817127 | 11.00479892 | 10.83935272 | 10.81466165 |
| Col4a3bp | 9.145132481 | 9.144409993 | 9.049503843 | 9.113223033 | 9.212925769 | 9.209250084 |
| Col4a4   | 3.408645243 | 4.247088592 | 4.359090506 | 2.030760869 | 2.424393538 | 2.67860439  |
| Col5a1   | 8.658149292 | 8.486907609 | 8.709918311 | 8.250295724 | 8.392784817 | 7.878512125 |
| Col6a1   | 7.191610894 | 7.093864321 | 6.719919814 | 6.746222061 | 6.760618065 | 6.863708404 |
| Col6a2   | 6.843446461 | 6.862311704 | 6.740890878 | 6.978757094 | 6.855983658 | 6.690058614 |
| Col6a3   | 8.080934653 | 7.917704031 | 7.905070272 | 7.886902698 | 8.137230627 | 7.736830824 |
| Col7a1   | 4.916921051 | 5.862804336 | 5.342954171 | 5.227488897 | 4.78644219  | 5.613488471 |
| Col8a1   | 4.323558214 | 5.031695266 | 3.990174756 | 3.635872179 | 4.286420738 | 3.780271631 |
| Col8a2   | 5.46968923  | 5.744707001 | 4.359090506 | 3.959799763 | 4.78644219  | 5.099463222 |
| Col9a1   | 3.607234804 | 2.853470894 | 1.825170741 | 3.370835508 | 2.424393538 | 2.303023309 |
| Col9a2   | 6.910760951 | 6.993865632 | 6.362144593 | 6.867169543 | 6.49573456  | 6.710417912 |
| Col9a3   | 6.975074141 | 6.846015491 | 7.023583845 | 6.966776235 | 6.95329777  | 6.369989537 |
| Colec12  | 8.353987448 | 8.515525148 | 8.257705651 | 8.409241915 | 8.211236542 | 7.79518335  |
| Copa     | 11.23995472 | 11.33045377 | 11.34754754 | 11.14828758 | 11.23207811 | 11.24537551 |
| Cope     | 8.691344626 | 8.664676202 | 8.570443605 | 8.142588557 | 8.297161428 | 8.425915907 |
| Coro2a   | 6.180371882 | 6.059370691 | 5.885308556 | 5.484368924 | 5.937282724 | 6.538882047 |
| Coro2b   | 8.093405717 | 7.929352484 | 8.460955881 | 8.373387513 | 8.084503552 | 8.497956714 |
| Cox14    | 7.103931669 | 6.761653322 | 6.821853535 | 6.598755774 | 6.696475136 | 6.826885538 |
| Cox20    | 8.495395517 | 8.489532788 | 8.492211903 | 8.345899565 | 8.410029451 | 8.290481041 |
| Cox4i2   | 2.36018646  | 1.725454411 | 1           | 3.217496026 | 3.887381517 | 2.303023309 |
| Cox5a    | 8.982564457 | 8.8800626   | 8.90369579  | 8.946323819 | 8.785261192 | 8.812413293 |
| Cox6a1   | 9.256525758 | 9.268821457 | 9.334575175 | 9.091318683 | 8.80495045  | 8.894780508 |
| Cox7a2   | 9.211470278 | 9.261160251 | 8.83708979  | 8.937142783 | 9.027973137 | 8.955743083 |
| Cox7a2l  | 9.366796691 | 9.573512787 | 9.506684501 | 9.491159281 | 9.315627411 | 9.390511029 |
| Cox8a    | 9.356486188 | 9.543509231 | 9.51887733  | 9.343776497 | 9.230828084 | 9.415527885 |
| Cpeb2    | 9.230414685 | 9.033653289 | 8.912964789 | 9.182198982 | 9.269133282 | 9.154577076 |
| Cplx1    | 6.100248163 | 6.744172339 | 6.334817815 | 6.518955674 | 6.372130108 | 6.648457271 |
| Cpne1    | 9.427158618 | 9.538447408 | 9.372023724 | 9.158694032 | 9.23728333  | 9.139640778 |
| Cpne2    | 6.285557633 | 5.956864296 | 6.028636913 | 6.125188133 | 6.116045717 | 6.024597402 |
| Cpne4    | 6.132833551 | 6.016328018 | 6.587257783 | 6.229147667 | 6.40690416  | 6.669407889 |
| Cpsf6    | 11.92707436 | 11.83189203 | 11.95671801 | 11.84588946 | 11.88863319 | 11.84181415 |
| Crabp1   | 5.943756695 | 6.030818731 | 5.396800833 | 5.673154141 | 5.786986288 | 5.656095563 |

|               |             |             |             |             |             |             |
|---------------|-------------|-------------|-------------|-------------|-------------|-------------|
| Crabp2        | 7.599764006 | 6.804450958 | 6.719919814 | 7.014114022 | 6.484925303 | 6.627197922 |
| Crb2          | 8.641260736 | 8.238024401 | 8.286517902 | 7.997030751 | 8.055574126 | 7.878512125 |
| Creb1         | 10.86525481 | 10.82386917 | 10.97746146 | 10.84544679 | 10.80119347 | 10.65445457 |
| Creb3l2       | 5.391052138 | 5.245578321 | 5.547239836 | 5.484368924 | 5.184039686 | 5.569584671 |
| Crebbp        | 11.23057604 | 11.20549054 | 11.59795163 | 11.34969795 | 11.23046117 | 11.37856282 |
| Crhr2         | 1           | 1.40785378  | 1           | 3.217496026 | 1           | 3.617319577 |
| Crnk1l        | 8.781450886 | 8.890032051 | 8.802596988 | 8.678961627 | 8.783056817 | 8.515418536 |
| Crym          | 5.829124602 | 5.245578321 | 5.038690263 | 5.730965216 | 5.855724339 | 5.852080256 |
| Cryz          | 6.100248163 | 6.141785093 | 5.547239836 | 5.379823897 | 6.058884313 | 5.776850189 |
| Cse1l         | 10.29162667 | 10.21268227 | 10.28671883 | 10.10789075 | 10.20885127 | 10.03382884 |
| Csf2ra        | 7.317430238 | 7.323081463 | 6.971303891 | 7.527811331 | 7.204561609 | 7.339427003 |
| Csmd1         | 8.930225521 | 9.21273058  | 8.856435913 | 8.838685049 | 9.280116701 | 9.374652299 |
| Csmd3         | 9.748248213 | 9.921419968 | 9.245666435 | 9.752478876 | 9.982617585 | 9.954969208 |
| Csnk1a1       | 11.18468967 | 11.15924975 | 11.20295935 | 11.14895046 | 11.13818658 | 11.23487271 |
| Cspg4         | 6.410421315 | 6.795992396 | 6.677040407 | 6.502451963 | 6.299961727 | 6.42029526  |
| Cspg5         | 8.565702449 | 8.820840478 | 8.677653429 | 8.778272729 | 8.785261192 | 8.735028825 |
| Cthrc1        | 6.083675251 | 5.830037047 | 5.168191412 | 5.941500387 | 5.888902992 | 5.099463222 |
| Ctif          | 8.851650288 | 8.703635593 | 9.00685477  | 8.693574379 | 8.692000395 | 8.912462825 |
| Ctnna1        | 10.20233356 | 10.27335241 | 10.37823458 | 10.14025412 | 9.966195363 | 10.0378623  |
| Ctnna2        | 11.36608718 | 11.54597598 | 11.40369402 | 11.38445077 | 11.46201325 | 11.52727317 |
| Ctnnb1        | 13.30242446 | 13.1944525  | 13.20534551 | 13.08132432 | 13.05591175 | 12.92655121 |
| Ctnnb1l       | 9.056615058 | 9.040830348 | 9.049503843 | 8.66419935  | 8.644222225 | 8.594223824 |
| Ctsb          | 9.563384845 | 9.580917183 | 9.47886793  | 9.574444018 | 9.612334154 | 9.614991531 |
| Ctsc          | 6.066909744 | 5.65401096  | 4.359090506 | 5.011224712 | 4.920840026 | 5.327464956 |
| Ctsd          | 9.64754335  | 9.754658297 | 9.598588894 | 9.493248879 | 9.415776136 | 9.381016726 |
| Cttnbp2nl     | 9.763936196 | 9.703566842 | 9.935207493 | 9.664352621 | 9.775349147 | 9.900633231 |
| Cul4b         | 9.351303172 | 9.377693499 | 9.285462875 | 9.422642099 | 9.47705994  | 9.488076416 |
| Cwf19l2       | 8.126144275 | 7.959962914 | 8.167646663 | 8.014595011 | 8.033489886 | 7.905252094 |
| Cx3cl1        | 6.43676005  | 6.045165342 | 6.249587406 | 6.167675041 | 6.418311711 | 6.119001134 |
| Cxx1a         | 6.132833551 | 6.352571455 | 6.44115009  | 6.399256858 | 5.888902992 | 6.178670863 |
| Cxxc1         | 8.437878486 | 8.497379785 | 8.962906393 | 8.240377438 | 8.287863066 | 8.303941444 |
| Cxxc4         | 9.537757761 | 9.325754026 | 9.629842141 | 9.50157714  | 9.684970254 | 9.841865315 |
| Cyb5a         | 8.185595857 | 8.253552067 | 8.213378775 | 8.26993005  | 8.059222188 | 8.214116523 |
| Cybrd1        | 4.75888608  | 4.814389099 | 4.738542537 | 4.914743422 | 5.311865251 | 5.524302751 |
| Cygb          | 5.092852815 | 6.114833364 | 5.228828563 | 6.013151561 | 6.116045717 | 6.119001134 |
| Cyp26b1       | 7.874838514 | 7.541211386 | 5.038690263 | 8.110278101 | 7.941608657 | 8.163328226 |
| Cyp39a1       | 6.561690132 | 6.364061526 | 6.632847408 | 5.989661022 | 5.921335734 | 5.273752905 |
| Cyth4         | 4.627849702 | 4.636319916 | 3.842769234 | 4.963790449 | 5.184039686 | 5.327464956 |
| D030047H15Rik | 6.783137934 | 6.690421389 | 7.106715447 | 5.730965216 | 6.63913022  | 6.088214528 |
| D10Jhu81e     | 7.576262265 | 7.520823978 | 7.673818665 | 7.189310683 | 7.336682964 | 7.216701442 |
| D130009I18Rik | 4.009405591 | 3.39155842  | 1           | 2.851100857 | 3.887381517 | 3.617319577 |
| D16Ertd472e   | 7.484555014 | 7.1076004   | 7.074035358 | 7.209786787 | 7.204561609 | 6.583715671 |
| D19Bwg1357e   | 8.971346845 | 8.874047693 | 9.197173657 | 8.675285195 | 8.680203371 | 8.694722238 |
| D430041D05Rik | 9.430439141 | 9.506402174 | 9.732878302 | 9.641924457 | 9.701405126 | 9.739090133 |
| D930016D06Rik | 8.257546304 | 8.167644567 | 8.021050658 | 8.110278101 | 8.214511904 | 7.804683367 |
| D930020B18Rik | 1.834785459 | 1.40785378  | 1.825170741 | 1           | 1           | 1           |
| Daam1         | 10.39179041 | 10.44344152 | 10.33923108 | 10.40951625 | 10.43628258 | 10.47866653 |

|         |             |             |             |             |             |             |
|---------|-------------|-------------|-------------|-------------|-------------|-------------|
| Daam2   | 6.730880483 | 6.993865632 | 6.781940076 | 7.209786787 | 7.237134017 | 6.863708404 |
| Dab1    | 9.693322711 | 9.750286692 | 10.08623319 | 9.914060187 | 9.870815262 | 9.959228952 |
| Dach1   | 9.644721597 | 9.430562671 | 9.463179342 | 9.320428285 | 9.441162222 | 9.464296639 |
| Dach2   | 6.87268094  | 6.526258914 | 6.249587406 | 6.598755774 | 6.599593485 | 6.845414449 |
| Dapk3   | 7.420009252 | 7.49492777  | 7.809044438 | 7.08232993  | 7.15768828  | 7.173357913 |
| Dbf4    | 8.791690936 | 8.56614582  | 8.587910159 | 8.511749957 | 8.487886235 | 8.270051993 |
| Dcaf5   | 9.58856464  | 9.477601273 | 9.779230151 | 9.733158755 | 9.645473671 | 9.790197672 |
| Dcc     | 12.06247685 | 11.90745546 | 12.17564133 | 12.02879647 | 12.13344254 | 12.03832104 |
| Dchs1   | 11.77215081 | 11.74502804 | 11.99158618 | 11.78365179 | 11.76032623 | 11.93289037 |
| Dclk1   | 12.18504117 | 12.28375338 | 12.22810367 | 12.22983908 | 12.30955551 | 12.36001126 |
| Dclk3   | 4.840066407 | 4.780490277 | 4.652620793 | 5.305666106 | 5.101528924 | 6.149144468 |
| Dclre1c | 7.76479027  | 7.743904933 | 7.706168466 | 7.560066561 | 7.677759001 | 7.546116814 |
| Dcx     | 13.38674701 | 13.47338759 | 13.53857896 | 13.48464117 | 13.63385907 | 13.6921253  |
| Ddah2   | 10.13857618 | 9.953148676 | 10.00404763 | 9.818965064 | 9.67549415  | 9.639087748 |
| Ddit3   | 6.698592606 | 6.155074467 | 6.306963417 | 5.786548686 | 5.359984332 | 5.776850189 |
| Ddit4l  | 4.581385593 | 4.636319916 | 4.652620793 | 4.914743422 | 4.473020427 | 4.901186937 |
| Ddn     | 4.009405591 | 4.433135735 | 4.969302427 | 3.959799763 | 3.234144523 | 2.976330056 |
| Ddx21   | 9.953725645 | 10.04791773 | 10.00621451 | 9.946449867 | 9.935759061 | 9.974039779 |
| Ddx25   | 7.870014287 | 7.866111468 | 8.046541268 | 8.099345118 | 8.022319688 | 8.040053218 |
| Ddx39b  | 10.99055577 | 10.91212533 | 11.05591173 | 10.74028693 | 10.6647771  | 10.74111651 |
| Ddx3x   | 12.25817294 | 12.1441131  | 12.31544922 | 12.32177477 | 12.03730134 | 12.02110589 |
| Ddx3y   | 1           | 1           | 1           | 1           | 9.1493141   | 9.10929611  |
| Degs1   | 7.722595849 | 7.703773087 | 7.695465596 | 7.239966139 | 7.648997054 | 7.50008031  |
| Dek     | 9.903854702 | 9.893940368 | 10.08418331 | 9.973645183 | 9.693211093 | 9.633767706 |
| Dennd4a | 9.213375952 | 9.013730268 | 8.899038863 | 8.985446693 | 9.10764337  | 9.042613165 |
| Dera    | 5.997828709 | 5.779446964 | 5.104893407 | 4.141311987 | 5.157057049 | 3.22300096  |
| Derl1   | 8.96230953  | 8.710402883 | 8.715226328 | 8.474157781 | 8.717619208 | 8.610564849 |
| Dgke    | 8.831939429 | 8.723842969 | 8.467261493 | 8.902970099 | 8.830791647 | 8.912462825 |
| Dgki    | 8.574625402 | 8.797725286 | 8.797601428 | 8.871185604 | 8.726823489 | 9.093881028 |
| Dgkz    | 8.441134751 | 8.750353253 | 8.516738137 | 8.626618954 | 8.217779847 | 8.642701895 |
| Dhdds   | 7.840725169 | 8.222327792 | 8.10432422  | 7.91211235  | 7.83072568  | 7.464562498 |
| Dhx57   | 10.26339214 | 10.41955033 | 10.27598305 | 10.28357466 | 10.26521469 | 10.47866653 |
| Dhx8    | 9.283987232 | 9.225385037 | 9.497471774 | 9.267692101 | 9.073778625 | 8.93858647  |
| Dhx9    | 11.81545192 | 11.71841882 | 11.96007533 | 11.82239642 | 11.84966692 | 11.80914835 |
| Diap3   | 7.780300359 | 7.436265054 | 7.905070272 | 7.373012443 | 7.366434099 | 7.272538694 |
| Dimt1   | 7.386620135 | 7.525947903 | 7.673818665 | 7.560066561 | 7.668235255 | 7.590729603 |
| Dis3    | 8.953215246 | 8.767759953 | 8.841950696 | 8.893508061 | 8.740520733 | 8.54405996  |
| Disp2   | 9.402314003 | 9.40158529  | 9.378729333 | 9.446563705 | 9.417198255 | 9.525901608 |
| Dld     | 9.184523103 | 9.172454456 | 9.29258211  | 9.150773171 | 9.242105879 | 9.22702349  |
| Dlg2    | 8.94406327  | 9.347623162 | 9.143060805 | 9.035057071 | 9.539768475 | 9.540189713 |
| Dlgap1  | 7.152415964 | 8.008359949 | 7.230500702 | 7.808517735 | 7.860301472 | 7.88748063  |
| Dlgap5  | 8.40490511  | 8.190412753 | 8.159881693 | 8.0938474   | 8.003508322 | 7.69657526  |
| Dlk1    | 8.068354845 | 7.730651305 | 8.243080832 | 7.924553886 | 7.457713316 | 7.488337929 |
| Dll1    | 9.423870619 | 9.124280461 | 9.509742382 | 9.113223033 | 9.128629182 | 9.058582815 |
| Dll3    | 7.019317849 | 6.91794109  | 6.249587406 | 7.136811703 | 6.91354482  | 6.808115555 |
| Dlx2    | 7.206995492 | 7.334807857 | 7.716792521 | 7.527811331 | 6.91354482  | 7.634004102 |
| Dmbx1   | 4.581385593 | 4.780490277 | 3.842769234 | 4.914743422 | 3.427188559 | 3.926671999 |



|          |             |             |             |             |             |             |
|----------|-------------|-------------|-------------|-------------|-------------|-------------|
| Dmrt3    | 4.87900544  | 5.169039459 | 6.159003922 | 4.811344491 | 4.920840026 | 5.217963548 |
| Dmrta2   | 7.446175096 | 7.436265054 | 7.876927609 | 7.209786787 | 7.137123938 | 7.128671755 |
| Dmxl2    | 11.36265684 | 11.41089991 | 11.34326857 | 11.30221765 | 11.4061732  | 11.44992255 |
| Dna2     | 7.426595337 | 7.473870828 | 7.385028612 | 7.002424395 | 7.318533265 | 6.690058614 |
| Dnah2    | 6.47538792  | 6.615488935 | 6.09529247  | 6.485757272 | 6.872665379 | 7.143721456 |
| Dnaic2   | 4.67286394  | 4.558445459 | 4.123905703 | 3.045898796 | 3.887381517 | 2.976330056 |
| Dnaja2   | 10.08650066 | 10.05236346 | 10.1775112  | 9.976635482 | 9.994098212 | 10.09704896 |
| Dnajb9   | 6.462626536 | 6.536450301 | 7.057413452 | 6.059015424 | 6.599593485 | 6.648457271 |
| Dnajc21  | 7.599764006 | 7.546263538 | 7.618236209 | 7.363905487 | 7.49050709  | 7.173357913 |
| Dnal4    | 7.870014287 | 7.967515106 | 7.923531613 | 7.660177676 | 7.441032588 | 7.286166751 |
| Dnase1l2 | 5.615166341 | 5.910600739 | 5.168191412 | 5.64335602  | 5.714808604 | 6.178670863 |
| Dnm1     | 8.916253759 | 8.984251173 | 9.150916591 | 9.150773171 | 9.140731397 | 9.12833619  |
| Dnm3     | 9.43534598  | 9.59804774  | 9.509742382 | 9.55056166  | 9.749615404 | 9.758773744 |
| Dnpep    | 8.841828521 | 8.761257027 | 8.962906393 | 8.46991976  | 8.602328401 | 8.432058627 |
| Dock10   | 6.910760951 | 6.66277579  | 5.726154136 | 6.598755774 | 6.760618065 | 6.468905804 |
| Dock3    | 10.17227738 | 10.1543201  | 10.06975203 | 10.27266729 | 10.24693708 | 10.30379287 |
| Dock8    | 3.93744424  | 4.517872985 | 3.280577348 | 3.635872179 | 3.333892988 | 2.67860439  |
| Dock9    | 9.098462387 | 9.291563959 | 8.894366855 | 9.262800919 | 9.320195464 | 9.361838593 |
| Dopey1   | 10.20425133 | 10.29302176 | 10.14247824 | 10.09693959 | 10.31488824 | 10.17786039 |
| Dph3     | 8.025611828 | 8.41692035  | 8.175370063 | 8.014595011 | 7.949492922 | 7.88748063  |
| Dph6     | 6.687667379 | 6.352571455 | 6.698639411 | 6.746222061 | 6.463060749 | 6.42029526  |
| Dpm3     | 5.997828709 | 6.244822593 | 6.466552201 | 5.484368924 | 5.406550135 | 5.697480352 |
| Dpp10    | 7.936128212 | 8.147838842 | 7.914330472 | 8.104821966 | 8.10582618  | 8.375809226 |
| Dpp3     | 9.486672744 | 9.241048598 | 9.488199839 | 9.094074984 | 9.048306945 | 9.082210654 |
| Dpp6     | 9.30379854  | 9.553579907 | 9.375380425 | 9.396085313 | 9.589810533 | 9.799730468 |
| Dpy19l1  | 9.850974302 | 10.04345825 | 9.94653532  | 9.895219988 | 10.13817325 | 10.13142944 |
| Dpysl3   | 13.50960546 | 13.60963931 | 13.53389293 | 13.49588784 | 13.5344925  | 13.63119316 |
| Dpysl5   | 11.01534446 | 10.9507403  | 11.35521786 | 11.09974185 | 10.90366825 | 11.1479787  |
| Dqx1     | 4.009405591 | 4.089895615 | 3.280577348 | 2.358763209 | 2.594940123 | 2.976330056 |
| Dr1      | 8.618430655 | 8.518098813 | 8.422532248 | 8.391426095 | 8.250058482 | 8.642701895 |
| Drap1    | 8.854095318 | 9.028246966 | 9.178079794 | 8.880794695 | 8.813615713 | 8.769396357 |
| Drosha   | 9.981947123 | 10.04345825 | 10.35971224 | 10.03086655 | 9.915776388 | 10.10283623 |
| Dscaml1  | 8.663735161 | 9.015552863 | 8.985047923 | 8.955446798 | 8.935728392 | 9.187628869 |
| Dse      | 7.112126384 | 6.829533096 | 6.516052763 | 6.841154966 | 6.91354482  | 6.583715671 |
| Dsg2     | 1.476947654 | 1.985596612 | 1.825170741 | 1           | 1           | 1.793876829 |
| Dsp      | 4.009405591 | 4.780490277 | 4.738542537 | 4.053408608 | 4.888396012 | 4.901186937 |
| Dtd1     | 7.331536226 | 7.100748709 | 7.330732364 | 7.209786787 | 7.095094417 | 6.985655341 |
| Dtl      | 8.421485998 | 8.103970274 | 8.307755651 | 8.395900718 | 8.240450495 | 8.185313927 |
| Dtna     | 8.085103664 | 8.200061614 | 7.595389438 | 8.284482401 | 8.12683825  | 8.382168562 |
| Dtx1     | 9.241663061 | 9.204764805 | 9.411797686 | 9.215488456 | 9.066546776 | 9.237583374 |
| Dusp16   | 8.242694171 | 8.183944139 | 8.504527138 | 8.099345118 | 8.070111351 | 7.79518335  |
| Dut      | 8.658149292 | 8.523232409 | 8.342471581 | 8.395900718 | 8.441119012 | 8.199787102 |
| Dvl3     | 8.638426655 | 8.678547025 | 9.170370925 | 8.722363213 | 8.485176791 | 8.788673515 |
| Dync2h1  | 10.6847272  | 10.64174011 | 10.49855615 | 10.46060324 | 10.52667297 | 10.38361344 |
| Dynll1   | 10.34822573 | 10.55604855 | 10.60818487 | 10.14955828 | 10.12517957 | 10.06182912 |
| Dynll2   | 9.209562083 | 9.170819786 | 9.684987654 | 9.404992002 | 9.154439319 | 9.358617304 |
| Dyrk3    | 7.266943973 | 6.653441599 | 6.563911094 | 6.629479584 | 6.796030117 | 6.207605066 |

|               |             |             |             |             |             |             |
|---------------|-------------|-------------|-------------|-------------|-------------|-------------|
| Dzank1        | 7.588060991 | 7.653156834 | 7.606858048 | 7.739777923 | 7.925709676 | 8.178022524 |
| Dzip1l        | 7.845648168 | 7.525947903 | 7.695465596 | 7.199585062 | 7.318533265 | 7.187950923 |
| E030019B13Rik | 7.05376114  | 7.293341578 | 7.259855879 | 6.801231826 | 6.558942651 | 6.808115555 |
| E130008D07Rik | 7.668055912 | 8.058725832 | 7.651841978 | 7.991128155 | 7.774136874 | 7.823497767 |
| E130018N17Rik | 1           | 1           | 2.72911076  | 1           | 1           | 1           |
| E130114P18Rik | 7.611372851 | 7.595835205 | 7.524594614 | 7.115265253 | 7.211135189 | 7.113463403 |
| E2f2          | 6.813607307 | 6.941140917 | 7.437355307 | 7.136811703 | 6.687074545 | 6.178670863 |
| Echdc2        | 5.219618891 | 5.387455657 | 4.359090506 | 5.58184729  | 5.287190159 | 5.327464956 |
| Echdc3        | 2.36018646  | 2.397010683 | 2.346809092 | 3.959799763 | 3.011219987 | 2.976330056 |
| Ect2          | 9.079781151 | 8.959847792 | 9.057884423 | 8.921710014 | 8.837180266 | 8.835768745 |
| Edf1          | 8.846747763 | 8.909766627 | 8.90369579  | 8.733012623 | 8.47428784  | 8.41974692  |
| Edrf1         | 9.190340021 | 9.105578363 | 9.0283369   | 8.667904105 | 8.893439387 | 8.739988881 |
| Eef1a2        | 8.01253802  | 8.41692035  | 8.120417294 | 8.322585966 | 8.36946657  | 8.297226941 |
| Eef1b2        | 10.50347277 | 10.44614692 | 10.31845498 | 10.39840929 | 10.34359249 | 10.26646638 |
| Eef1d         | 9.410643171 | 9.55608663  | 9.503620124 | 9.255432913 | 9.080974404 | 9.124548224 |
| Eef2k         | 8.485967179 | 8.728295317 | 8.558680638 | 8.686286504 | 8.614776899 | 8.684467147 |
| Eepd1         | 6.148854342 | 6.269471835 | 5.847135518 | 5.101656215 | 5.751348778 | 5.273752905 |
| Efcab5        | 5.391052138 | 5.318260347 | 4.652620793 | 5.517598924 | 5.101528924 | 4.828538958 |
| Efna2         | 7.743847311 | 7.739500572 | 7.886369626 | 7.435200555 | 7.27527434  | 7.113463403 |
| Efna5         | 8.729131168 | 8.265854981 | 8.473539665 | 8.645531514 | 8.629574683 | 8.798216354 |
| Efnb2         | 10.0623862  | 10.04702693 | 10.53503216 | 10.02076175 | 10.17982171 | 10.17420042 |
| Egfl6         | 4.009405591 | 3.298813141 | 3.493254909 | 3.635872179 | 4.235739691 | 3.433590479 |
| Egflam        | 6.488037412 | 6.128372165 | 6.220020382 | 6.188458315 | 6.287574716 | 6.42029526  |
| Egfr          | 6.449751263 | 6.690421389 | 6.189834702 | 6.85422089  | 6.813415432 | 7.339427003 |
| Ehbp1l1       | 8.01253802  | 8.209646372 | 8.167646663 | 7.936889044 | 7.5642458   | 7.464562498 |
| Ehf           | 1           | 1.40785378  | 2.346809092 | 1           | 1           | 2.303023309 |
| Eif2ak3       | 8.60687869  | 8.337547416 | 8.546820973 | 8.04340178  | 8.221040404 | 7.940151466 |
| Eif2s3y       | 1           | 1           | 1           | 1           | 9.201416624 | 9.165678688 |
| Eif3a         | 11.34885332 | 11.30794902 | 11.51516388 | 11.32468706 | 11.35477921 | 11.40065703 |
| Eif3b         | 9.823789028 | 9.562334449 | 10.02129217 | 9.72606861  | 9.736004642 | 9.792586783 |
| Eif3f         | 9.895570486 | 9.82077709  | 9.824139018 | 9.560560732 | 9.456458864 | 9.706520173 |
| Eif4a2        | 11.28187435 | 11.31573625 | 11.05800214 | 11.13027382 | 11.18192766 | 11.14984342 |
| Eif4ebp2      | 7.701026658 | 7.323081463 | 8.389711842 | 7.47803465  | 7.533103826 | 8.03198727  |
| Eif4g2        | 13.436541   | 13.32649642 | 13.54362283 | 13.38082218 | 13.50946038 | 13.4156357  |
| Eif4g3        | 10.99222167 | 11.00724944 | 11.24025733 | 11.00260016 | 11.04972547 | 11.14891136 |
| Eif5          | 10.88810223 | 10.83681259 | 10.93941396 | 10.9609292  | 10.9807101  | 11.0007737  |
| Elavl1        | 10.71328891 | 10.76441329 | 10.8768443  | 10.7154416  | 10.85097477 | 10.63461636 |
| Elavl2        | 10.8115423  | 10.79550866 | 10.76740326 | 10.77419503 | 10.86354749 | 10.88799426 |
| Elavl3        | 11.35878793 | 11.27066081 | 11.52653092 | 11.31998565 | 11.30379487 | 11.5766283  |
| Elavl4        | 10.52127399 | 10.41955033 | 10.6517446  | 10.39394245 | 10.47230041 | 10.59957039 |
| Elf2          | 9.96394909  | 9.929176095 | 9.997527416 | 9.992972245 | 9.798450906 | 9.893973222 |
| Elfn2         | 6.241413634 | 6.941140917 | 6.362144593 | 7.059947778 | 6.787258259 | 6.769826698 |
| Ell3          | 2.904029779 | 4.196570335 | 4.359090506 | 2.358763209 | 4.013081531 | 4.293477201 |
| Elmod2        | 8.747659671 | 8.765595566 | 8.56457411  | 8.832096146 | 8.879063027 | 8.730051656 |
| Elmsan1       | 7.963560843 | 7.653156834 | 8.213378775 | 7.841697207 | 7.663449702 | 7.579705073 |
| Eln           | 4.533375098 | 5.294437552 | 5.104893407 | 5.144831462 | 4.67673177  | 5.379248858 |
| Elovl5        | 9.155081423 | 9.088363477 | 9.241993544 | 8.955446798 | 8.809289587 | 8.674138638 |

|          |             |             |             |             |             |             |
|----------|-------------|-------------|-------------|-------------|-------------|-------------|
| Emilin1  | 6.462626536 | 6.194223517 | 6.362144593 | 6.502451963 | 6.23693491  | 6.119001134 |
| Eml1     | 8.953215246 | 8.784959135 | 8.83708979  | 8.532218858 | 8.604826709 | 8.759660317 |
| Eml5     | 10.82593774 | 10.79709896 | 10.75585954 | 10.808164   | 10.83457112 | 10.77534103 |
| Emx1     | 7.622889029 | 7.61038054  | 7.758523245 | 7.354740679 | 7.330658399 | 6.881773285 |
| Emx2     | 6.720197947 | 7.058940817 | 7.274312476 | 6.978757094 | 6.312243287 | 7.230864661 |
| Emx2os   | 6.241413634 | 6.101166306 | 6.127499866 | 5.730965216 | 6.210932461 | 6.119001134 |
| Enah     | 11.65959446 | 11.66948086 | 11.81558516 | 11.70559989 | 11.76870595 | 11.70519643 |
| Enc1     | 11.60620204 | 11.60315281 | 11.78940231 | 11.59270804 | 11.70289049 | 11.85616166 |
| Enho     | 8.10986786  | 8.103970274 | 7.76877001  | 7.930734648 | 7.969017113 | 7.896393726 |
| Enoph1   | 7.81585499  | 7.757037911 | 7.848225027 | 7.781413557 | 7.634398156 | 7.842069961 |
| Enpep    | 3.781766418 | 4.388824542 | 2.72911076  | 3.509431521 | 3.597423784 | 4.059575235 |
| Enpp5    | 8.523316375 | 8.767759953 | 8.504527138 | 8.689935044 | 8.719925789 | 8.93858647  |
| Entpd4   | 3.178288549 | 2.205919617 | 1           | 3.217496026 | 2.007489679 | 1           |
| Eny2     | 8.778879476 | 8.730516349 | 8.736265233 | 8.785111498 | 9.071974059 | 8.981101413 |
| Eomes    | 9.269406189 | 9.237929461 | 9.836369554 | 9.369030495 | 9.276987105 | 9.502742164 |
| Ep300    | 10.54870317 | 10.41265097 | 10.67372276 | 10.52840088 | 10.64791715 | 10.59273207 |
| Epb4.1   | 10.94712589 | 10.88994142 | 11.2476026  | 10.93810028 | 10.83616675 | 10.88687664 |
| Epb4.2   | 2.904029779 | 2.397010683 | 1.825170741 | 3.752118759 | 2.230948887 | 2.976330056 |
| Epc2     | 10.05709016 | 10.10638174 | 10.22851544 | 10.05086626 | 9.953509838 | 10.07758862 |
| Epcam    | 3.178288549 | 3.56087634  | 2.72911076  | 3.509431521 | 3.234144523 | 3.22300096  |
| Epha5    | 11.17151675 | 11.26530908 | 11.3577656  | 11.17911813 | 11.26246043 | 11.35935182 |
| Ephb3    | 7.879646662 | 7.457873945 | 7.68468273  | 7.560066561 | 7.262672602 | 7.143721456 |
| Ephb6    | 8.580543523 | 8.425171246 | 8.528846649 | 8.274797162 | 8.351727169 | 8.76453655  |
| Epm2aip1 | 10.80017524 | 10.66920903 | 10.63643802 | 10.63444848 | 10.92381816 | 10.87226823 |
| Epyc     | 1.834785459 | 2.56572585  | 1.825170741 | 1           | 1           | 1           |
| Erbp2ip  | 11.23667911 | 11.19185385 | 11.25491066 | 11.11542779 | 11.13775534 | 11.08991522 |
| Erbp3    | 4.75888608  | 3.638623163 | 1           | 2.030760869 | 2.230948887 | 3.22300096  |
| Erc2     | 8.721116952 | 8.425171246 | 8.510645557 | 8.147903975 | 8.217779847 | 8.170694084 |
| Erich1   | 5.997828709 | 6.442027408 | 6.516052763 | 5.484368924 | 5.872409042 | 5.737711018 |
| Erlec1   | 7.73326071  | 7.83754723  | 8.167646663 | 8.110278101 | 8.029776088 | 7.814121237 |
| Etl4     | 8.598153606 | 8.386256817 | 8.949456506 | 8.418067996 | 8.327730146 | 8.526943428 |
| Ets2     | 7.214626703 | 7.16784392  | 6.879726671 | 7.259740587 | 7.256330214 | 7.365337495 |
| Etv6     | 8.085103664 | 7.993640727 | 7.857856143 | 7.89324653  | 7.905586346 | 7.905252094 |
| Eva1b    | 5.615166341 | 5.22051385  | 4.652620793 | 5.267106973 | 4.428584041 | 4.828538958 |
| Evc      | 6.891846582 | 7.328956574 | 7.154388143 | 6.917832351 | 6.760618065 | 6.444805259 |
| Exosc1   | 7.019317849 | 6.452829242 | 6.677040407 | 6.249069934 | 6.517113106 | 6.056756594 |
| Ezr      | 9.395615872 | 9.436016788 | 9.732878302 | 9.265248583 | 9.020507389 | 9.282470221 |
| Fabp5    | 10.08857865 | 10.27867444 | 10.15033719 | 10.2130596  | 10.19233454 | 10.26646638 |
| Fabp7    | 10.98610395 | 11.0686679  | 10.90498857 | 10.90001824 | 11.14506892 | 10.98936372 |
| Fads3    | 7.317430238 | 7.058940817 | 6.677040407 | 6.644599561 | 7.02966115  | 7.158615784 |
| Fam101b  | 5.726108215 | 6.101166306 | 5.922497536 | 5.58184729  | 6.171028365 | 3.617319577 |
| Fam103a1 | 7.393360064 | 7.546263538 | 7.560426231 | 7.47803465  | 7.796165259 | 7.726871747 |
| Fam109a  | 8.353987448 | 8.271967317 | 7.86742339  | 7.781413557 | 7.769690545 | 7.676018269 |
| Fam110b  | 8.122092354 | 8.427911092 | 8.235712449 | 7.854758244 | 8.026052705 | 7.922807306 |
| Fam114a1 | 6.62031939  | 6.030818731 | 5.76761879  | 5.343221434 | 5.804480268 | 5.613488471 |
| Fam131c  | 3.697138272 | 3.39155842  | 3.678570668 | 4.302518316 | 5.014011403 | 4.752037851 |
| Fam132b  | 5.125603781 | 5.596723939 | 4.561255977 | 4.224165625 | 5.21052692  | 5.036351157 |

|           |             |             |             |             |             |             |
|-----------|-------------|-------------|-------------|-------------|-------------|-------------|
| Fam135b   | 6.015411544 | 6.5465702   | 5.994117534 | 6.614199465 | 6.668087581 | 6.5159317   |
| Fam155a   | 8.609775365 | 8.631782708 | 8.467261493 | 8.71879587  | 8.63447374  | 8.826471886 |
| Fam160a1  | 1.834785459 | 2.853470894 | 3.280577348 | 3.635872179 | 2.424393538 | 2.67860439  |
| Fam163a   | 6.195876154 | 6.101166306 | 4.359090506 | 5.702349231 | 5.21052692  | 4.970351389 |
| Fam168a   | 10.79890668 | 10.90673401 | 11.03271501 | 10.8617126  | 11.04697221 | 11.17935565 |
| Fam171a2  | 9.80874191  | 9.934002584 | 9.900680363 | 9.731389483 | 9.592330593 | 9.601428772 |
| Fam171b   | 9.353032914 | 9.34182373  | 9.334575175 | 9.382621323 | 9.468854777 | 9.381016726 |
| Fam189a1  | 6.87268094  | 6.717547177 | 6.84140367  | 7.239966139 | 7.123249702 | 6.951852343 |
| Fam19a1   | 5.059341058 | 6.045165342 | 5.228828563 | 5.379823897 | 6.463060749 | 6.291080771 |
| Fam19a2   | 8.677605939 | 8.723842969 | 8.152074704 | 8.435559803 | 8.661125159 | 8.754767547 |
| Fam19a5   | 8.231453863 | 8.528347802 | 8.44826137  | 8.400361505 | 8.116370468 | 8.503800836 |
| Fam212a   | 4.205973248 | 4.597908067 | 4.561255977 | 4.811344491 | 4.235739691 | 4.181261307 |
| Fam219aos | 5.336140447 | 5.4098024   | 4.359090506 | 5.702349231 | 5.359984332 | 6.235970365 |
| Fam220a   | 8.444383682 | 8.408621994 | 8.356127376 | 8.452842071 | 8.272231367 | 8.343585151 |
| Fam49a    | 9.654573683 | 10.02457643 | 10.03196627 | 9.780126914 | 10.10943108 | 10.29033107 |
| Fam64a    | 8.134214136 | 8.008359949 | 7.977539161 | 7.760745934 | 7.747250999 | 7.428148153 |
| Fam76b    | 9.172818431 | 8.835359626 | 8.953953748 | 9.003151687 | 9.070167232 | 8.912462825 |
| Fam84a    | 8.849201108 | 8.872037138 | 8.912964789 | 8.825477013 | 8.959348388 | 9.074377625 |
| Fam96b    | 7.266943973 | 7.447109957 | 7.524594614 | 6.880003011 | 6.830593737 | 6.881773285 |
| Fam98b    | 7.50958588  | 7.219360232 | 7.848225027 | 7.469568968 | 7.705958732 | 7.62330656  |
| Fap       | 2.565099681 | 3.39155842  | 3.031034773 | 2.030760869 | 3.749675008 | 2.976330056 |
| Fastk     | 8.185595857 | 7.959962914 | 8.300711082 | 8.060413729 | 7.782988631 | 8.015718814 |
| Fastkd1   | 7.206995492 | 7.141379091 | 6.540180369 | 6.717910076 | 6.86434863  | 6.808115555 |
| Fau       | 10.02923292 | 10.02457643 | 9.907652211 | 9.817298013 | 9.791888065 | 9.81626278  |
| Faxc      | 10.63369762 | 10.62691306 | 10.84087384 | 10.81903391 | 10.83084112 | 10.8902269  |
| Fbln1     | 8.231453863 | 7.820967243 | 8.112393197 | 7.91834653  | 7.648997054 | 7.860406105 |
| Fbln2     | 7.070679248 | 7.1076004   | 6.362144593 | 6.674372271 | 6.677612298 | 6.178670863 |
| Fbn2      | 9.641894313 | 9.773091238 | 9.551885811 | 9.467971694 | 9.485218701 | 9.326002533 |
| Fbxl17    | 9.846069475 | 9.817646605 | 9.740707768 | 9.828927122 | 10.00454246 | 9.898416643 |
| Fbxl8     | 2.744494966 | 2.205919617 | 3.280577348 | 1.605542449 | 1           | 1           |
| Fbxo11    | 10.69089535 | 10.6703664  | 10.86495352 | 10.69107143 | 10.70375576 | 10.74851899 |
| Fbxo18    | 10.05390318 | 9.971105091 | 9.982197991 | 9.850278451 | 9.877029459 | 9.609581718 |
| Fbxo47    | 3.861704164 | 2.397010683 | 3.493254909 | 1.605542449 | 3.234144523 | 1.793876829 |
| Fbxo48    | 5.4177436   | 4.295897557 | 4.123905703 | 5.96578166  | 5.516785121 | 4.901186937 |
| Fcgrt     | 6.328390908 | 6.128372165 | 5.342954171 | 5.96578166  | 5.968657436 | 5.273752905 |
| Fcho1     | 8.760750124 | 8.863966783 | 8.61087474  | 8.802067925 | 8.622194764 | 8.735028825 |
| Fcho2     | 9.045960774 | 8.927299847 | 9.107170597 | 8.861512083 | 9.061098999 | 9.093881028 |
| Fdps      | 9.123000266 | 9.129339236 | 8.827318565 | 8.930989471 | 8.883185197 | 8.788673515 |
| Fem1c     | 9.020064814 | 8.86194212  | 9.011176862 | 8.902970099 | 8.856178116 | 8.599691423 |
| Fen1      | 8.154193484 | 8.183944139 | 8.088049603 | 7.924553886 | 7.687220289 | 7.69657526  |
| Fgf10     | 2.904029779 | 2.397010683 | 1           | 2.625832949 | 2.747440291 | 3.617319577 |
| Fgf14     | 7.749111622 | 7.95617194  | 7.716792521 | 7.89324653  | 8.14411752  | 8.071873474 |
| Fgf15     | 7.679130094 | 7.639038527 | 7.288625645 | 7.298494479 | 7.366434099 | 6.690058614 |
| Fgfr3     | 9.74956208  | 9.540980539 | 9.740707768 | 9.570490978 | 9.269133282 | 9.176695524 |
| Fggy      | 4.323558214 | 5.060230054 | 4.246285218 | 5.343221434 | 5.129560124 | 5.429238262 |
| Fibin     | 3.298059683 | 3.39155842  | 3.031034773 | 2.358763209 | 3.887381517 | 3.22300096  |
| Fign      | 8.81697752  | 8.750353253 | 8.917577052 | 8.704437625 | 8.931753854 | 8.663735651 |

|         |             |             |             |             |             |             |
|---------|-------------|-------------|-------------|-------------|-------------|-------------|
| Figl1   | 8.07675356  | 7.97502797  | 8.0715893   | 7.795029296 | 7.742720901 | 7.050974221 |
| Filip1l | 6.066909744 | 5.57711136  | 5.683462387 | 6.485757272 | 5.968657436 | 6.263788702 |
| Fis1    | 9.10873727  | 9.154370406 | 9.200962291 | 8.864743803 | 8.856178116 | 8.749858127 |
| Fkbp10  | 6.410421315 | 6.155074467 | 6.610232669 | 6.344752403 | 6.249762475 | 6.263788702 |
| Fkbp1b  | 6.226393616 | 5.65401096  | 5.342954171 | 5.057148905 | 5.043777717 | 5.923581073 |
| Fkbp4   | 10.77652452 | 10.83216633 | 10.82254661 | 10.61538911 | 10.53978865 | 10.52106468 |
| Flnc    | 8.072560314 | 8.314043575 | 8.307755651 | 8.220333933 | 8.14411752  | 8.110686546 |
| Flrt1   | 7.835785313 | 7.6578324   | 8.272183702 | 8.121128854 | 8.011062327 | 8.394803751 |
| Flywch2 | 5.519829329 | 6.232338222 | 5.396800833 | 6.326116853 | 6.262476989 | 6.369989537 |
| Fmn2    | 8.669299485 | 8.822923609 | 8.736265233 | 8.899822977 | 8.760825811 | 8.826471886 |
| Fmnl3   | 7.795645475 | 7.712788247 | 7.886369626 | 7.936889044 | 7.860301472 | 7.814121237 |
| Fmr1    | 9.739017485 | 9.498604231 | 9.727634952 | 9.645686781 | 9.760860432 | 9.703984069 |
| Fn1     | 11.10635127 | 10.96684377 | 11.14415601 | 10.95941846 | 10.73716139 | 10.79215357 |
| Fnbp1l  | 11.92707436 | 11.99919827 | 12.12917443 | 11.98862689 | 12.10151241 | 12.19010453 |
| Fnbp4   | 10.07920405 | 10.0026902  | 10.24878881 | 10.0621714  | 10.05748387 | 10.02978406 |
| Fndc3b  | 8.072560314 | 8.147838842 | 7.950788095 | 8.235392608 | 8.178067321 | 8.41974692  |
| Fndc3c1 | 5.27905573  | 4.517872985 | 4.81963345  | 4.376833985 | 4.714236588 | 4.059575235 |
| Fndc5   | 5.768201518 | 4.814389099 | 4.738542537 | 4.699958789 | 4.557986608 | 4.970351389 |
| Fndc8   | 3.298059683 | 4.780490277 | 4.246285218 | 4.376833985 | 3.597423784 | 4.293477201 |
| Fndc9   | 6.823622422 | 6.933449019 | 7.106715447 | 6.978757094 | 7.230678103 | 6.881773285 |
| Fnip2   | 9.377034031 | 9.23636736  | 9.382070486 | 9.255432913 | 9.297209172 | 9.241086228 |
| Fnta    | 8.520240608 | 8.660022799 | 8.460955881 | 8.377918347 | 8.312526749 | 8.297226941 |
| Focad   | 8.553718678 | 8.573588025 | 8.264962838 | 8.486797657 | 8.54624179  | 8.71501629  |
| Foxa1   | 5.059341058 | 5.142596755 | 5.287019574 | 4.447508334 | 5.129560124 | 4.494694577 |
| Foxg1   | 9.624813259 | 9.290058896 | 10.1106072  | 9.743729063 | 9.468854777 | 9.965595077 |
| Foxl1   | 3.781766418 | 1.725454411 | 1.825170741 | 2.625832949 | 2.230948887 | 1.793876829 |
| Foxm1   | 8.507871545 | 8.334630292 | 8.908337734 | 8.426840409 | 8.198060224 | 8.270051993 |
| Foxn2   | 8.162108389 | 8.137833076 | 8.243080832 | 8.142588557 | 7.976753403 | 8.056051073 |
| Foxp1   | 9.606077676 | 9.510285397 | 9.638249547 | 9.745483276 | 9.790791349 | 9.698898447 |
| Foxp2   | 10.25323911 | 10.16585473 | 10.00837813 | 10.29080069 | 10.37759254 | 10.16500964 |
| Frem2   | 7.706449263 | 7.795734426 | 7.695465596 | 7.637684005 | 7.843475333 | 7.488337929 |
| Frmd4a  | 10.77910012 | 10.75517065 | 10.86853105 | 10.91646235 | 10.83829151 | 11.05152935 |
| Frmd5   | 9.363368038 | 9.493382087 | 9.641041164 | 9.378105258 | 9.485218701 | 9.446200997 |
| Frmpd4  | 5.4177436   | 5.294437552 | 3.990174756 | 4.579248421 | 5.579097119 | 5.814955531 |
| Fry     | 10.74261635 | 10.88097146 | 10.63923314 | 10.78532292 | 10.8708313  | 10.93849077 |
| Fsd1l   | 10.96193719 | 10.77036242 | 10.89332844 | 10.77591261 | 10.91930891 | 10.74851899 |
| Fstl1   | 10.09169002 | 9.955049384 | 9.833931727 | 9.745483276 | 9.701405126 | 9.568348287 |
| Fstl5   | 9.100523226 | 9.282509934 | 8.875526039 | 9.132120267 | 9.387035356 | 9.12833619  |
| Ftl1    | 12.32403252 | 12.27007675 | 12.21504876 | 12.14200254 | 11.87472627 | 12.01139543 |
| Fubp1   | 12.13790985 | 12.12545701 | 12.17612258 | 12.04241733 | 12.04674963 | 12.04735246 |
| Fubp3   | 8.995911463 | 8.853814935 | 8.935880049 | 8.95241221  | 8.701369048 | 8.802964207 |
| Fuk     | 7.08740126  | 7.058940817 | 7.200535793 | 6.644599561 | 6.77843274  | 6.395361653 |
| Fundc1  | 7.222217761 | 6.870391298 | 6.988941883 | 7.30802245  | 7.506628612 | 7.428148153 |
| Fundc2  | 7.497124732 | 7.408790683 | 7.385028612 | 7.408876053 | 7.614700277 | 7.143721456 |
| Fus     | 9.32510505  | 9.119203886 | 10.06767859 | 9.774983106 | 9.368042046 | 9.763652969 |
| Fut9    | 10.11532356 | 10.09004164 | 10.19661254 | 10.14823278 | 10.38778332 | 10.33363035 |
| Fxyd2   | 3.178288549 | 2.397010683 | 3.031034773 | 1           | 1.418787199 | 1.793876829 |

|           |             |             |             |             |             |             |
|-----------|-------------|-------------|-------------|-------------|-------------|-------------|
| Fzd10     | 8.003755861 | 7.225672326 | 6.971303891 | 7.126078702 | 6.88093446  | 7.128671755 |
| Fzd2      | 8.185595857 | 8.256637645 | 8.13633283  | 7.746801175 | 7.663449702 | 7.464562498 |
| Fzd3      | 12.54989947 | 12.48017319 | 12.54554155 | 12.38081052 | 12.5187613  | 12.35395775 |
| Fzd7      | 7.338537835 | 7.086946925 | 7.411429183 | 6.966776235 | 6.99198465  | 7.034919655 |
| Gab2      | 8.655348226 | 8.732733967 | 8.644650427 | 8.825477013 | 8.822229241 | 8.997762678 |
| Gabarapl2 | 8.290414903 | 8.34336403  | 8.159881693 | 8.184573446 | 8.19142666  | 8.297226941 |
| Gabbr2    | 7.651283602 | 7.5860562   | 7.330732364 | 7.583793375 | 7.435429209 | 7.97422651  |
| Gabpb2    | 9.245393114 | 9.26269575  | 9.331122063 | 9.029308328 | 9.123411278 | 9.078299456 |
| Gabrb1    | 5.157627734 | 5.894843895 | 5.038690263 | 5.550080729 | 5.579097119 | 5.958045085 |
| Gabrb2    | 9.778168509 | 9.813462029 | 9.51887733  | 9.752478876 | 9.821188562 | 9.87154849  |
| Gabrb3    | 10.16047253 | 10.14934832 | 10.21359015 | 10.19776475 | 10.29491418 | 10.45322053 |
| Gabrg1    | 5.46968923  | 5.813370024 | 5.228828563 | 6.103466066 | 6.249762475 | 6.149144468 |
| Gabrg2    | 9.265737785 | 9.404370252 | 9.351717838 | 9.507791936 | 9.468854777 | 9.508566972 |
| Gad1os    | 2.565099681 | 2.205919617 | 2.346809092 | 2.625832949 | 2.007489679 | 2.303023309 |
| Gad2      | 10.44385051 | 10.31094311 | 10.42595603 | 10.25676518 | 10.35921372 | 10.36286322 |
| Galc      | 7.413392962 | 7.093864321 | 7.385028612 | 7.336234532 | 7.224193168 | 6.934649122 |
| Galnt10   | 7.296009232 | 7.520823978 | 7.023583845 | 7.199585062 | 7.348657141 | 7.511727889 |
| Galnt18   | 6.015411544 | 6.207040629 | 6.09529247  | 5.759024621 | 6.171028365 | 6.863708404 |
| Gap43     | 10.92345619 | 11.0159251  | 10.88981194 | 10.9149043  | 10.9589055  | 10.97891211 |
| Garnl3    | 7.288797629 | 7.441697696 | 7.006366839 | 7.382062272 | 7.724456908 | 7.804683367 |
| Gas1      | 8.583493505 | 8.360674473 | 8.441871979 | 8.189736678 | 7.984448429 | 7.940151466 |
| Gas2l1    | 6.397069404 | 6.59613151  | 6.466552201 | 6.363150301 | 5.968657436 | 6.178670863 |
| Gas7      | 8.326078235 | 8.328778287 | 8.683081269 | 8.452842071 | 8.767531156 | 9.154577076 |
| Gata3     | 6.720197947 | 6.5465702   | 6.698639411 | 7.229976337 | 6.383814838 | 6.710417912 |
| Gatad2b   | 8.146234916 | 7.853938836 | 8.205856719 | 7.795029296 | 7.941608657 | 7.97422651  |
| Gbp10     | 1.476947654 | 2.978340632 | 1           | 2.358763209 | 2.230948887 | 2.976330056 |
| Gcnt1     | 4.143380003 | 3.913456893 | 3.493254909 | 3.370835508 | 3.597423784 | 3.780271631 |
| Gdf10     | 4.143380003 | 3.913456893 | 3.990174756 | 3.752118759 | 3.9516001   | 4.585672437 |
| Get4      | 7.406746189 | 7.369425779 | 7.462823734 | 7.048625126 | 6.822030152 | 6.730493894 |
| Gfm2      | 8.635586996 | 8.86194212  | 9.041074296 | 8.435559803 | 8.632026291 | 8.118325412 |
| Gfod1     | 7.835785313 | 7.708287709 | 7.122782017 | 7.704139468 | 7.604749556 | 7.665628876 |
| Gfpt1     | 10.11021867 | 9.966401344 | 10.08623319 | 9.984084224 | 10.09439798 | 10.20142658 |
| Gfra4     | 5.391052138 | 5.537067746 | 5.287019574 | 5.866103848 | 5.3361254   | 5.569584671 |
| Ggnbp1    | 4.077947413 | 4.814389099 | 4.123905703 | 3.217496026 | 3.820170665 | 3.617319577 |
| Ggps1     | 9.004741357 | 8.936949232 | 8.661246298 | 8.890340207 | 8.789659863 | 8.921223372 |
| Ggta1     | 5.848873694 | 6.329313082 | 5.287019574 | 5.702349231 | 5.429281276 | 5.737711018 |
| Gins3     | 6.783137934 | 6.452829242 | 6.278560623 | 6.125188133 | 5.638828837 | 5.923581073 |
| Gipc1     | 8.737101111 | 8.835359626 | 8.949456506 | 8.444226815 | 8.514704441 | 8.532671532 |
| Gja5      | 4.716516059 | 3.56087634  | 4.46371154  | 2.851100857 | 3.514815644 | 2.976330056 |
| Gjb6      | 5.125603781 | 5.341696146 | 5.342954171 | 4.447508334 | 4.983617975 | 5.099463222 |
| Gldc      | 8.374570657 | 8.369252424 | 8.522805096 | 7.861244686 | 8.08807928  | 8.103007018 |
| Gldn      | 2.121272526 | 1           | 1           | 2.358763209 | 2.885350385 | 3.617319577 |
| Gli3      | 10.02815067 | 9.892949207 | 10.38157687 | 9.918732044 | 9.875995617 | 9.889516074 |
| Glra2     | 8.253847581 | 8.452338336 | 8.272183702 | 8.289300747 | 8.471552712 | 8.63206889  |
| Glra4     | 3.861704164 | 4.295897557 | 4.81963345  | 3.370835508 | 3.126983752 | 3.617319577 |
| Glt8d2    | 4.205973248 | 4.673735516 | 4.81963345  | 5.450355447 | 5.429281276 | 4.397591105 |
| Gltscr1   | 8.142239108 | 7.671768861 | 8.389711842 | 8.137253483 | 7.677759001 | 8.28370345  |

|         |             |               |               |               |               |             |
|---------|-------------|---------------|---------------|---------------|---------------|-------------|
| Glyctk  | 9.131087683 | 8.853814935   | 9.18574769    | 9.110503108   | 8.776423411   | 8.817114729 |
| Gm10516 | 5.125603781 | 4.745775733   | 4.738542537   | 4.699958789   | 4.75079107    | 3.780271631 |
| Gm10536 | 1.834785459 | 2.978340632   |               | 1 3.045898796 | 2.885350385   | 4.494694577 |
| Gm11437 | 3.511354355 | 3.712393585   | 3.280577348   | 4.447508334   | 4.473020427   | 4.494694577 |
| Gm11944 | 5.980028937 | 6.07343753    | 6.719919814   | 6.036265739   | 6.548598415   | 6.149144468 |
| Gm13212 | 1.476947654 |               | 1             | 1 2.358763209 | 1.742960444   | 2.67860439  |
| Gm13710 | 2.36018646  |               | 1 1.825170741 | 1.605542449   | 3.234144523   | 1.793876829 |
| Gm14204 | 9.166930291 | 9.21431847    | 9.227207756   | 9.161324684   | 9.105880695   | 9.090001383 |
| Gm14327 |             | 1 1.40785378  |               | 1 2.358763209 | 3.011219987   | 1.793876829 |
| Gm14403 | 5.188956249 | 5.474837936   | 5.287019574   | 5.227488897   | 5.619191772   | 5.036351157 |
| Gm15708 | 4.716516059 | 4.089895615   | 4.738542537   | 4.863970092   | 5.014011403   | 5.099463222 |
| Gm16386 | 9.520929612 | 9.625756567   | 9.313731426   | 9.400545531   | 9.494679304   | 9.352153069 |
| Gm17066 | 9.088113801 | 8.890032051   | 8.782510115   | 8.937142783   | 9.273850704   | 9.018322268 |
| Gm17750 | 5.997828709 | 6.431144087   | 6.062349611   | 6.485757272   | 6.299961727   | 6.024597402 |
| Gm19395 | 3.298059683 | 3.093258183   | 3.031034773   | 4.224165625   | 4.128701845   | 4.671251885 |
| Gm19522 | 6.148854342 | 6.181291514   | 5.228828563   | 5.484368924   | 5.619191772   | 5.888273572 |
| Gm20300 | 6.95698962  | 7.044731214   | 6.953447591   | 7.399993384   | 7.330658399   | 7.352440416 |
| Gm20939 | 3.511354355 | 3.199693499   | 2.72911076    | 2.358763209   | 2.424393538   | 1.793876829 |
| Gm2115  | 4.143380003 | 2.716760345   | 2.72911076    | 2.030760869   | 2.747440291   | 1.793876829 |
| Gm4984  | 2.36018646  | 2.56572585    | 1.825170741   | 1.605542449   | 2.230948887   | 1.793876829 |
| Gm5113  | 6.6087826   | 6.59613151    | 5.922497536   | 7.158041089   | 7.051803628   | 6.730493894 |
| Gm5441  | 5.943756695 | 5.387455657   | 5.547239836   | 5.702349231   | 5.599283728   | 5.697480352 |
| Gm6402  | 6.676658785 | 7.127962371   | 6.917057967   | 7.037212907   | 6.796030117   | 6.789098145 |
| Gm6682  | 4.533375098 | 4.911553418   | 4.123905703   | 5.305666106   | 4.516128927   | 4.585672437 |
| Gm9047  | 2.121272526 | 2.205919617   | 1.825170741   | 2.625832949   | 3.126983752   | 2.303023309 |
| Gm9159  | 3.861704164 | 4.144218708   | 4.561255977   | 3.045898796   | 3.234144523   | 1.793876829 |
| Gmfg    | 3.298059683 | 1.985596612   |               | 1 1.605542449 | 1.418787199   | 3.433590479 |
| Gmnn    | 6.597152809 | 6.672049976   | 6.898513064   | 6.229147667   | 6.157477901   | 6.119001134 |
| Gnai2   | 10.17521357 | 10.24022205   | 10.56326887   | 10.25183675   | 9.952529393   | 10.07758862 |
| Gnal    | 8.556723966 | 8.878060416   | 8.349315636   | 8.754078474   | 8.735969419   | 9.090001383 |
| Gnao1   | 10.85857299 | 10.92478892   | 11.26218188   | 11.09836976   | 10.89041825   | 11.18664034 |
| Gnb1    | 11.70160879 | 11.63876888   | 11.8437267    | 11.76517977   | 11.7723221    | 11.84871876 |
| Gnb2    | 10.71597982 | 10.7595275    | 10.7468168    | 10.57649793   | 10.49873569   | 10.57618663 |
| Gnb211  | 12.10544022 | 12.03580439   | 11.90771753   | 11.78621058   | 11.88015045   | 11.6588069  |
| Gnb5    | 7.237281091 | 7.40323246    | 7.274312476   | 7.382062272   | 7.553939654   | 7.428148153 |
| Gng10   | 7.959024809 | 7.937066195   | 7.437355307   | 7.91211235    | 8.066490754   | 8.297226941 |
| Gng2    | 11.87505365 | 11.91650664   | 11.98115885   | 11.98936732   | 11.98599776   | 12.07214707 |
| Gng8    | 3.861704164 | 3.712393585   | 2.72911076    | 2.030760869   | 2.747440291   | 1           |
| Gorasp1 | 7.036642281 | 7.141379091   | 7.13867163    | 6.905332463   | 6.822030152   | 7.034919655 |
| Gpbar1  | 3.178288549 | 2.205919617   | 2.346809092   |               | 1 2.230948887 | 1           |
| Gpm6a   | 11.76046782 | 11.94380304   | 11.83521984   | 11.83522077   | 11.98527887   | 11.93775546 |
| Gpm6b   | 11.4577624  | 11.4236533    | 11.5652574    | 11.48132265   | 11.56214662   | 11.5766283  |
| Gpr101  |             | 1 1.985596612 | 1.825170741   | 1.605542449   | 1.418787199   | 2.976330056 |
| Gpr12   | 4.077947413 | 4.144218708   | 4.561255977   | 5.267106973   | 5.184039686   | 5.036351157 |
| Gpr137  | 7.617142431 | 7.680985601   | 7.45014572    | 7.345517279   | 7.372311406   | 7.706744944 |
| Gpr153  | 7.634314007 | 7.541211386   | 7.074035358   | 7.637684005   | 7.044460497   | 7.546116814 |
| Gpr156  | 7.288797629 | 7.250648107   | 7.302798206   | 7.037212907   | 7.360532752   | 7.50008031  |

|          |             |             |             |             |             |             |
|----------|-------------|-------------|-------------|-------------|-------------|-------------|
| Gprasp1  | 11.93748774 | 12.05675518 | 11.93242579 | 11.99932609 | 12.03914978 | 12.0413378  |
| Gps1     | 9.174775816 | 9.037246281 | 9.174230508 | 8.747090646 | 8.811454272 | 8.981101413 |
| Gpsm2    | 8.925583285 | 8.837421913 | 8.949456506 | 8.591938723 | 8.490590601 | 8.549720638 |
| Gpt      | 6.975074141 | 6.634590065 | 6.879726671 | 5.866103848 | 6.223992267 | 6.024597402 |
| Gpx4     | 8.85897298  | 8.882062009 | 8.757001731 | 8.486797657 | 8.407169622 | 8.492088822 |
| Gramd1b  | 7.738563721 | 7.812605244 | 7.818939792 | 7.560066561 | 8.014824549 | 7.860406105 |
| Grb10    | 11.94151717 | 11.70690317 | 12.01867175 | 11.7866366  | 11.58320372 | 11.45972728 |
| Grb14    | 6.241413634 | 6.101166306 | 5.95875192  | 6.188458315 | 6.348472847 | 5.888273572 |
| Gria1    | 9.390571786 | 9.776319803 | 9.784289618 | 9.560560732 | 9.785295232 | 9.920430752 |
| Gria2    | 11.91979837 | 12.08350069 | 11.98005684 | 12.04384365 | 12.18631956 | 12.22766795 |
| Gria3    | 8.290414903 | 8.512946884 | 8.396335926 | 8.444226815 | 8.592291682 | 8.432058627 |
| Grik1    | 7.593924365 | 7.874169869 | 7.629525334 | 8.099345118 | 7.760756566 | 7.665628876 |
| Grik3    | 9.827526414 | 9.961682211 | 10.27777791 | 10.01931242 | 10.08994651 | 10.23870012 |
| Grik4    | 6.585428507 | 6.244822593 | 6.028636913 | 6.081411933 | 6.073388388 | 6.468905804 |
| Grin2b   | 9.988638917 | 10.32423951 | 10.27777791 | 10.22316682 | 10.3383476  | 10.37885135 |
| Grin2d   | 5.219618891 | 5.537067746 | 5.726154136 | 6.4517769   | 6.087748098 | 5.697480352 |
| Grin3a   | 8.235210372 | 8.319955531 | 7.950788095 | 8.194881497 | 8.339778551 | 8.730051656 |
| Gripap1  | 8.562715826 | 8.703635593 | 8.884977203 | 8.791918003 | 8.754089156 | 8.94719028  |
| Grk6     | 9.397293322 | 9.386171148 | 9.368659195 | 9.003151687 | 9.018634899 | 9.158287114 |
| Grm1     | 6.70943572  | 7.238214263 | 7.106715447 | 7.115265253 | 7.452174475 | 7.523282183 |
| Grm3     | 7.825854568 | 7.963743951 | 7.437355307 | 8.031948003 | 8.137230627 | 8.41355144  |
| Grm5     | 8.62130425  | 8.999066014 | 8.416027626 | 8.855026845 | 9.219461434 | 9.219940381 |
| Grm7     | 7.570326519 | 7.576210458 | 7.006366839 | 7.544029088 | 7.604749556 | 7.557400011 |
| Grm8     | 6.793366059 | 6.787483949 | 6.362144593 | 6.978757094 | 7.007173525 | 6.985655341 |
| Grwd1    | 6.92012595  | 7.121206929 | 7.245252952 | 6.942511838 | 6.93752779  | 6.648457271 |
| Gsap     | 6.369989055 | 6.340989138 | 6.249587406 | 6.30723743  | 7.044460497 | 6.710417912 |
| Gsc      | 1           | 1           | 1           | 2.030760869 | 1.418787199 | 1           |
| Gsg2     | 6.488037412 | 5.910600739 | 6.028636913 | 5.673154141 | 5.677318849 | 5.569584671 |
| Gsk3b    | 11.76242157 | 11.57623757 | 11.8878767  | 11.62260535 | 11.81124237 | 11.74952593 |
| Gsn      | 6.6087826   | 6.963973565 | 5.76761879  | 6.146587985 | 5.751348778 | 6.119001134 |
| Gsta4    | 6.083675251 | 5.926187346 | 5.885308556 | 5.484368924 | 5.516785121 | 5.569584671 |
| Gstm2    | 4.432277612 | 3.849499474 | 4.246285218 | 2.030760869 | 3.126983752 | 2.67860439  |
| Gstm5    | 8.336607562 | 8.212827193 | 8.13633283  | 8.060413729 | 7.999716434 | 8.214116523 |
| Gstp1    | 7.345505628 | 7.187378743 | 7.500202711 | 7.115265253 | 7.256330214 | 7.726871747 |
| Gtf2a1   | 9.701492381 | 9.643544992 | 9.811803909 | 9.78695692  | 9.670732655 | 9.554337699 |
| Gtf2h3   | 8.080934653 | 8.012016409 | 7.77894451  | 7.452487101 | 7.80053086  | 7.706744944 |
| Gtf2h5   | 8.340100329 | 8.497379785 | 8.307755651 | 8.147903975 | 8.253246977 | 8.503800836 |
| Gtf2ird1 | 9.180632088 | 9.215904615 | 9.162620643 | 9.243068661 | 9.04094595  | 9.285865894 |
| Gtse1    | 7.452643073 | 7.397652741 | 7.572175032 | 7.025709693 | 7.051803628 | 6.648457271 |
| Gucy1a2  | 10.01072335 | 9.909707029 | 9.829043681 | 9.915619154 | 9.907705171 | 9.87154849  |
| Gucy1a3  | 8.126144275 | 8.360674473 | 8.22830624  | 8.457130482 | 8.275371286 | 8.206969603 |
| Guk1     | 7.459082181 | 7.468558218 | 7.560426231 | 7.652718685 | 7.629498843 | 7.3781203   |
| Gxylt1   | 9.045960774 | 8.71265161  | 9.204741002 | 8.645531514 | 8.760825811 | 8.826471886 |
| Gxylt2   | 2.904029779 | 2.56572585  | 1.825170741 | 4.141311987 | 3.234144523 | 2.303023309 |
| Gyltl1b  | 3.861704164 | 3.56087634  | 4.246285218 | 3.370835508 | 3.011219987 | 3.617319577 |
| H1f0     | 11.32437473 | 11.26262575 | 11.26941665 | 11.2666223  | 10.9807101  | 10.97891211 |
| H1fx     | 7.08740126  | 7.008582571 | 7.230500702 | 7.147465445 | 6.39540569  | 6.826885538 |



|           |             |             |             |             |             |             |
|-----------|-------------|-------------|-------------|-------------|-------------|-------------|
| H2-K1     | 5.615166341 | 5.387455657 | 4.81963345  | 4.811344491 | 3.887381517 | 3.22300096  |
| H2afv     | 9.661569923 | 9.601692258 | 9.51887733  | 9.418249777 | 9.272279944 | 9.216385743 |
| H2afx     | 10.00303219 | 9.762276875 | 9.779230151 | 9.560560732 | 9.232444606 | 9.399943259 |
| Hapl1n1   | 3.047666507 | 2.56572585  | 4.246285218 | 3.217496026 | 3.011219987 | 3.433590479 |
| Haus3     | 7.465492678 | 7.414327574 | 7.45014572  | 7.399993384 | 7.300152323 | 7.69657526  |
| Haus6     | 8.394864328 | 8.265854981 | 8.213378775 | 8.066040091 | 8.290969184 | 8.343585151 |
| Hax1      | 7.68463547  | 7.6578324   | 7.437355307 | 7.552070109 | 7.116262226 | 7.326295136 |
| Hbb-bh1   | 5.615166341 | 4.911553418 | 4.246285218 | 4.224165625 | 2.885350385 | 2.67860439  |
| Hbegf     | 5.363857532 | 5.910600739 | 4.561255977 | 5.415520654 | 5.733194373 | 5.429238262 |
| Hcfc1     | 11.23198673 | 11.12546984 | 11.54005421 | 11.21057417 | 11.11777772 | 11.36337526 |
| Hcn3      | 7.711851562 | 7.551298059 | 7.074035358 | 7.973274069 | 7.543559355 | 7.686333379 |
| Hdac5     | 9.643308647 | 9.376275701 | 9.415063212 | 9.255432913 | 9.214562463 | 9.090001383 |
| Hdgrfp3   | 11.45010573 | 11.53743848 | 11.32862438 | 11.47604947 | 11.50042422 | 11.57454735 |
| Hdlbp     | 10.80144267 | 10.87295106 | 10.99393332 | 10.82069895 | 10.77092375 | 10.75465884 |
| Heatr3    | 8.460519489 | 8.452338336 | 8.220861814 | 8.490986459 | 8.460560049 | 8.52119249  |
| Hectd2    | 7.870014287 | 7.882183508 | 7.86742339  | 7.560066561 | 8.033489886 | 7.940151466 |
| Hecw1     | 10.83153188 | 10.90132248 | 10.89917028 | 10.96168398 | 11.03960438 | 11.11590413 |
| Heg1      | 9.182578907 | 8.993528261 | 9.560758579 | 9.212954822 | 9.080974404 | 9.082210654 |
| Hells     | 8.948646515 | 8.888043665 | 8.841950696 | 8.841968251 | 8.342774996 | 8.276893869 |
| Hepacam   | 2.744494966 | 3.478699897 | 1.825170741 | 3.752118759 | 4.382735357 | 4.585672437 |
| Herc3     | 8.603976188 | 8.752540611 | 8.504527138 | 8.588033395 | 8.760825811 | 8.849602658 |
| Herc6     | 4.009405591 | 4.476126405 | 4.561255977 | 3.370835508 | 4.428584041 | 3.617319577 |
| Herpud1   | 7.79054855  | 7.662492862 | 7.487850347 | 7.47803465  | 7.184659224 | 7.665628876 |
| Hes5      | 8.595233479 | 8.262789074 | 8.213378775 | 8.031948003 | 7.872793531 | 8.071873474 |
| Hfm1      | 7.252188767 | 7.35797852  | 7.006366839 | 7.443869719 | 7.5642458   | 7.686333379 |
| Hic2      | 8.510973767 | 8.671628284 | 8.782510115 | 8.439899818 | 8.427070391 | 8.125924044 |
| Hipk1     | 10.59036048 | 10.52631505 | 10.75328168 | 10.61826412 | 10.62286835 | 10.50803948 |
| Hipk2     | 9.564878237 | 9.454945437 | 10.06352273 | 9.903099992 | 9.483862108 | 9.846471898 |
| Hipk3     | 9.316265547 | 9.480243425 | 9.506684501 | 9.265248583 | 9.577143778 | 9.421714901 |
| Hirip3    | 8.042861293 | 8.253552067 | 8.79258851  | 8.364282932 | 7.804883291 | 8.170694084 |
| Hist1h1a  | 11.13980301 | 11.04030117 | 11.26308822 | 10.98340251 | 10.86667363 | 10.61044472 |
| Hist1h1b  | 10.88212474 | 10.67267836 | 10.82623073 | 10.56263449 | 10.47366792 | 10.43651304 |
| Hist1h1c  | 11.39113716 | 11.17686599 | 11.14612248 | 10.87939569 | 11.01257609 | 10.76686071 |
| Hist1h1d  | 11.29453143 | 11.26032178 | 11.39792915 | 11.00186649 | 10.9807101  | 10.88575815 |
| Hist1h1e  | 11.94954243 | 11.75078396 | 11.88846416 | 11.69292838 | 11.42679379 | 11.40378591 |
| Hist1h2ab | 9.418924527 | 9.114109383 | 9.053700219 | 8.871185604 | 8.745057734 | 8.798216354 |
| Hist1h2ac | 8.745027267 | 8.600552286 | 8.812536511 | 8.404808543 | 8.327730146 | 7.590729603 |
| Hist1h2ad | 7.288797629 | 7.058940817 | 7.385028612 | 6.502451963 | 6.751627551 | 7.050974221 |
| Hist1h2ag | 7.152415964 | 7.473870828 | 7.818939792 | 6.773989117 | 6.945434327 | 6.968852843 |
| Hist1h2ai | 9.017885688 | 8.98796917  | 9.372023724 | 8.979496412 | 8.527928886 | 8.54405996  |
| Hist1h2ak | 10.09065364 | 10.0209517  | 10.32714808 | 9.877730968 | 9.603616704 | 9.746502994 |
| Hist1h2an | 7.898720599 | 7.874169869 | 8.01245271  | 7.955196258 | 7.312432268 | 7.415802885 |
| Hist1h2bb | 10.71732339 | 10.51282918 | 10.60818487 | 10.35425618 | 10.19648149 | 10.22284352 |
| Hist1h2bc | 9.30915474  | 9.250365749 | 9.415063212 | 9.074669371 | 8.858273628 | 8.989456097 |
| Hist1h2be | 9.949158534 | 10.02819207 | 9.993164176 | 9.733158755 | 9.577143778 | 9.557150723 |
| Hist1h2bf | 8.388131439 | 8.241143333 | 8.699243326 | 8.137253483 | 8.026052705 | 8.071873474 |
| Hist1h2bg | 9.47082841  | 9.357716408 | 9.382070486 | 9.158694032 | 8.92577144  | 8.867843915 |

|           |             |             |             |             |             |             |
|-----------|-------------|-------------|-------------|-------------|-------------|-------------|
| Hist1h2bh | 8.826969347 | 8.701372758 | 8.720514888 | 8.345899565 | 8.36946657  | 8.52119249  |
| Hist1h2bj | 8.64408926  | 8.299156817 | 8.540854379 | 7.979250015 | 8.119868174 | 7.665628876 |
| Hist1h2bk | 8.663735161 | 8.525792373 | 8.709918311 | 8.194881497 | 8.224293608 | 8.04807432  |
| Hist1h2bl | 8.05990695  | 7.933214495 | 7.758523245 | 7.486450945 | 7.457713316 | 7.62330656  |
| Hist1h2bm | 10.17716771 | 9.944564364 | 9.846079874 | 9.664352621 | 9.79735917  | 9.393661963 |
| Hist1h2bn | 9.880058159 | 9.765529705 | 10.05726642 | 9.686437447 | 9.496025769 | 9.135882415 |
| Hist1h2bp | 6.397069404 | 6.168242543 | 6.028636913 | 5.759024621 | 5.579097119 | 4.494694577 |
| Hist1h3a  | 9.098462387 | 8.89598082  | 8.841950696 | 8.426840409 | 8.253246977 | 8.221228213 |
| Hist1h3c  | 9.405651443 | 9.195147452 | 9.212268861 | 8.838685049 | 8.820080675 | 8.849602658 |
| Hist1h3d  | 8.658149292 | 8.548629906 | 8.870777137 | 8.418067996 | 8.1303107   | 8.071873474 |
| Hist1h3e  | 10.40268789 | 10.16913347 | 10.37488452 | 10.02076175 | 9.847798094 | 9.74403627  |
| Hist1h3f  | 9.801159086 | 9.613774587 | 10.07595455 | 9.532386811 | 9.359190849 | 9.446200997 |
| Hist1h3g  | 8.925583285 | 8.851775965 | 9.162620643 | 8.708040605 | 8.639356216 | 8.503800836 |
| Hist1h3h  | 8.319015748 | 8.369252424 | 8.328685292 | 8.110278101 | 7.945556175 | 7.982620987 |
| Hist1h3i  | 9.276715131 | 9.309503309 | 9.512793796 | 9.063462118 | 8.901590584 | 8.849602658 |
| Hist1h4a  | 9.443487141 | 9.532095051 | 9.54594017  | 9.265248583 | 9.125152677 | 8.921223372 |
| Hist1h4b  | 8.715749301 | 8.673938219 | 8.767259269 | 8.17939167  | 8.08807928  | 8.290481041 |
| Hist1h4c  | 9.834972263 | 9.83219777  | 9.939749302 | 9.520141784 | 9.622232877 | 9.525901608 |
| Hist1h4d  | 11.57207816 | 11.58608313 | 11.770405   | 11.46384753 | 11.1802535  | 11.18664034 |
| Hist1h4f  | 10.15254862 | 10.07088739 | 10.14050679 | 9.693724561 | 9.794078997 | 9.846471898 |
| Hist1h4h  | 10.94081351 | 10.86942807 | 11.12434249 | 10.81067972 | 10.48794898 | 10.69588579 |
| Hist1h4j  | 9.489820836 | 9.268821457 | 9.29258211  | 8.890340207 | 8.909695986 | 9.014233722 |
| Hist1h4k  | 9.837445697 | 9.83632843  | 9.774152877 | 9.530353177 | 9.287911119 | 9.412424399 |
| Hist2h2ac | 9.058736506 | 9.017373159 | 9.057884423 | 8.747090646 | 8.548839046 | 8.663735651 |
| Hist2h2bb | 11.24228989 | 11.02861594 | 11.17144561 | 10.8421715  | 10.85675087 | 10.54676752 |
| Hist3h2a  | 10.04536999 | 10.10552633 | 10.27777791 | 9.893638809 | 9.769793771 | 9.797353168 |
| Hist3h2ba | 9.797352676 | 9.571036186 | 9.905332003 | 9.556569415 | 9.524015063 | 9.424798487 |
| Hivep2    | 9.273065289 | 9.554833813 | 9.753663189 | 9.480665645 | 9.889378124 | 10.0011486  |
| Hk2       | 7.656896065 | 7.5860562   | 7.995101547 | 7.32689167  | 7.217678952 | 6.985655341 |
| Hmcn1     | 7.722595849 | 7.489692277 | 7.074035358 | 7.426478983 | 7.485092966 | 7.352440416 |
| Hmg20b    | 7.393360064 | 7.023150898 | 6.917057967 | 6.644599561 | 6.589537655 | 6.648457271 |
| Hmga2     | 7.01057699  | 6.681264926 | 7.37164492  | 6.659562717 | 6.184452741 | 6.119001134 |
| Hmgb2     | 8.85897298  | 8.578528251 | 8.880259361 | 8.832096146 | 8.457798746 | 8.41974692  |
| Hmgcl     | 6.698592606 | 6.463550801 | 6.781940076 | 6.188458315 | 5.838844419 | 5.991704972 |
| Hmgn5     | 5.249643377 | 5.088211387 | 6.610232669 | 5.305666106 | 5.579097119 | 5.656095563 |
| Hmx1      | 3.298059683 | 2.205919617 | 1           | 1           | 1           | 1           |
| Hn1       | 11.52067683 | 11.48183219 | 11.36284762 | 11.20675906 | 11.41224776 | 11.36176723 |
| Hn1l      | 9.864377223 | 9.715949979 | 9.997527416 | 9.724290616 | 9.481145088 | 9.598700853 |
| Hnrnpa0   | 11.14779704 | 10.94309955 | 11.11533685 | 10.96469915 | 11.00644792 | 10.96309134 |
| Hnrnpa1   | 7.152415964 | 6.717547177 | 7.259855879 | 7.259740587 | 6.742580658 | 6.934649122 |
| Hnrnpa2b1 | 11.33753989 | 11.24253466 | 11.43941223 | 11.27514847 | 11.12953722 | 11.23311479 |
| Hnrnpa3   | 9.698774295 | 9.683071419 | 9.870073528 | 9.671751857 | 9.827619753 | 9.595967765 |
| Hnrnpab   | 12.00560311 | 12.00746449 | 11.99922154 | 12.00994653 | 11.87472627 | 11.89002449 |
| Hnrnpd    | 10.48071008 | 10.29227019 | 10.59240651 | 10.52227442 | 10.54304903 | 10.60093417 |
| Hnrnpdl   | 11.35404513 | 11.18620106 | 11.42895085 | 11.40956197 | 11.36513184 | 11.39044107 |
| Hnrnp1    | 12.36124968 | 12.38080322 | 12.5728445  | 12.3858806  | 12.29202832 | 12.39777132 |
| Hnrnp3    | 7.244754184 | 7.023150898 | 7.706168466 | 7.363905487 | 6.961118584 | 7.034919655 |

|          |             |             |             |             |             |             |
|----------|-------------|-------------|-------------|-------------|-------------|-------------|
| Hnrnmpm  | 10.94311212 | 10.88596165 | 11.11734296 | 10.86897281 | 10.62901803 | 10.76807524 |
| Hnrnpu   | 12.72458101 | 12.75118591 | 12.98025092 | 12.77918065 | 12.69426962 | 12.67269854 |
| Hnrnpul1 | 10.3959915  | 10.41403349 | 10.883932   | 10.53145438 | 10.39212885 | 10.48754138 |
| Hnrnpul2 | 10.34649021 | 10.27563568 | 10.73118185 | 10.30037944 | 10.43277146 | 10.5225047  |
| Hook1    | 9.283987232 | 9.250365749 | 9.111202775 | 9.334482506 | 9.363623235 | 9.32929739  |
| Hook3    | 11.20494477 | 11.21384926 | 11.30769385 | 11.25620089 | 11.41117763 | 11.23750559 |
| Hopx     | 5.46968923  | 5.672612041 | 5.448709844 | 3.959799763 | 4.638225882 | 4.585672437 |
| Hoxb2    | 1.834785459 | 2.716760345 | 1           | 1.605542449 | 2.230948887 | 3.780271631 |
| Hoxd1    | 2.904029779 | 1.40785378  | 1           | 1           | 1           | 1.793876829 |
| Hpca     | 6.066909744 | 6.155074467 | 5.807924923 | 6.188458315 | 6.742580658 | 6.56147301  |
| Hpcal4   | 5.768201518 | 6.690421389 | 6.334817815 | 6.502451963 | 7.24995982  | 6.56147301  |
| Hps1     | 7.08740126  | 6.625071112 | 6.610232669 | 7.249887243 | 6.579411241 | 7.187950923 |
| Hpse2    | 1           | 1.40785378  | 1           | 1           | 1           | 1           |
| Hs6st2   | 8.434614855 | 8.680845918 | 8.661246298 | 8.595833508 | 8.684933763 | 8.684467147 |
| Hsd3b2   | 1.476947654 | 1.985596612 | 1           | 2.358763209 | 3.9516001   | 2.976330056 |
| Hsd3b6   | 5.307880412 | 3.712393585 | 3.990174756 | 4.053408608 | 3.597423784 | 4.585672437 |
| Hsf2     | 9.510117678 | 9.373435919 | 9.456855823 | 9.322780184 | 9.348795347 | 9.244580598 |
| Hsp90ab1 | 12.99766999 | 12.86978297 | 13.22780292 | 12.98474873 | 12.84122023 | 12.95535834 |
| Hsp90b1  | 11.42976026 | 11.60617983 | 11.67215708 | 11.31172114 | 11.30264116 | 11.21897375 |
| Hspa12a  | 9.33913656  | 9.346175488 | 9.372023724 | 9.252968526 | 9.472963192 | 9.403073682 |
| Hspa5    | 10.97940036 | 11.27599276 | 11.20201443 | 10.73676369 | 10.86511141 | 10.88015267 |
| Hspa8    | 13.38114206 | 13.57406077 | 13.68727912 | 13.2445021  | 13.1966074  | 13.20825642 |
| Hspa9    | 10.7472276  | 10.69275147 | 10.7153756  | 10.63350147 | 10.4913285  | 10.49048757 |
| Hspe1    | 8.586437467 | 8.750353253 | 8.802596988 | 8.700825624 | 8.412883623 | 8.689603805 |
| Hspg2    | 9.917946473 | 9.643544992 | 10.06975203 | 9.607614589 | 9.676682073 | 9.683533126 |
| Htatsf1  | 9.32686647  | 9.122590253 | 9.107170597 | 9.113223033 | 9.130364297 | 9.154577076 |
| Htr1d    | 1           | 1           | 1           | 1.605542449 | 2.747440291 | 2.303023309 |
| Htr3a    | 3.607234804 | 4.089895615 | 2.346809092 | 3.752118759 | 3.333892988 | 4.293477201 |
| Htra1    | 5.391052138 | 6.101166306 | 5.885308556 | 5.813557456 | 6.171028365 | 5.923581073 |
| Htra3    | 4.077947413 | 4.089895615 | 4.46371154  | 2.625832949 | 3.675556897 | 3.780271631 |
| Hus1     | 7.43967799  | 7.436265054 | 7.662872168 | 7.126078702 | 7.452174475 | 6.863708404 |
| Id1      | 6.342390651 | 6.257199856 | 5.885308556 | 5.144831462 | 6.275080428 | 5.852080256 |
| Id3      | 7.303184965 | 7.3053112   | 6.415292686 | 6.732135518 | 7.164478434 | 6.690058614 |
| Id4      | 10.49252872 | 10.4133424  | 10.50623174 | 10.2775252  | 10.2211159  | 10.37407349 |
| Ids      | 10.05496629 | 10.15100748 | 10.16398817 | 10.13491039 | 10.45717169 | 10.33527003 |
| Ier5l    | 7.160340601 | 7.14804095  | 6.698639411 | 6.125188133 | 6.463060749 | 6.178670863 |
| Ifngr2   | 8.080934653 | 8.325843359 | 7.986347078 | 8.250295724 | 8.214511904 | 8.549720638 |
| Ift122   | 8.535554284 | 8.337547416 | 8.473539665 | 8.153199881 | 8.037194149 | 8.079720074 |
| Ift52    | 7.112126384 | 7.200256538 | 7.437355307 | 7.808517735 | 7.682497401 | 7.665628876 |
| Igdcc3   | 7.303184965 | 7.127962371 | 6.917057967 | 6.468867128 | 6.648847398 | 6.263788702 |
| Igdcc4   | 8.677605939 | 8.767759953 | 8.677653429 | 8.812146937 | 8.802775977 | 9.010133557 |
| Igf1r    | 11.44686967 | 11.43459306 | 11.73752415 | 11.40845515 | 11.3691787  | 11.49169163 |
| Igf2bp1  | 10.22518028 | 9.872981632 | 10.25791063 | 9.906239982 | 9.722264248 | 9.688673104 |
| Igf2bp2  | 8.971346845 | 8.814572975 | 9.324190943 | 8.835394359 | 8.520008774 | 8.876878777 |
| Igf2bp3  | 9.801159086 | 9.669244236 | 9.786812714 | 9.750733153 | 9.421456218 | 9.403073682 |
| Igf2r    | 10.71799471 | 10.73981721 | 10.76356561 | 10.69924065 | 10.76758285 | 10.61854702 |
| Igfbp2   | 9.892005494 | 9.956947591 | 9.984397907 | 9.776699747 | 9.649109287 | 9.639087748 |

|        |             |             |             |             |             |             |
|--------|-------------|-------------|-------------|-------------|-------------|-------------|
| Igfbp3 | 6.561690132 | 6.886415994 | 6.062349611 | 6.208946435 | 6.619497285 | 6.690058614 |
| Igflr1 | 5.997828709 | 5.830037047 | 6.189834702 | 5.186752068 | 5.129560124 | 4.828538958 |
| Igip   | 5.74730838  | 5.195006214 | 5.287019574 | 4.914743422 | 5.359984332 | 4.828538958 |
| Igsf1  | 4.840066407 | 5.115660327 | 4.652620793 | 5.305666106 | 4.952570441 | 5.099463222 |
| Igsf3  | 10.44385051 | 10.40641321 | 10.38657585 | 10.36113754 | 10.47980569 | 10.51094415 |
| Igsf8  | 9.382125588 | 9.279479255 | 9.548916053 | 9.197658858 | 8.94364477  | 9.038592978 |
| Igtp   | 4.009405591 | 2.205919617 | 2.72911076  | 3.752118759 | 1.418787199 | 3.433590479 |
| Il10rb | 4.989887769 | 5.245578321 | 4.561255977 | 4.51488159  | 4.638225882 | 4.397591105 |
| Il1rap | 6.180371882 | 5.894843895 | 4.969302427 | 6.125188133 | 5.984092579 | 5.776850189 |
| Ilf3   | 11.09709182 | 11.05544041 | 11.3338099  | 11.19010932 | 11.02615353 | 11.1451771  |
| Immp2l | 3.178288549 | 2.56572585  | 1.825170741 | 4.053408608 | 3.234144523 | 4.181261307 |
| Incenp | 9.073499928 | 8.868007604 | 9.212268861 | 8.949371226 | 8.644222225 | 9.062547759 |
| Inppl1 | 9.052362782 | 8.645971851 | 8.661246298 | 8.584117467 | 8.237233561 | 8.401080089 |
| Intu   | 7.722595849 | 7.986224415 | 7.932674443 | 7.760745934 | 7.778569541 | 7.579705073 |
| Ip6k1  | 10.47833469 | 10.43325085 | 10.37823458 | 10.39506046 | 10.40866654 | 10.3221001  |
| Ipo5   | 10.98387288 | 10.93204458 | 11.06217391 | 10.85847407 | 10.78751319 | 10.75465884 |
| Ipw    | 7.990481565 | 8.200061614 | 8.003803213 | 7.997030751 | 8.164583118 | 8.125924044 |
| Iqgap2 | 8.773722866 | 8.622245153 | 9.0283369   | 8.890340207 | 8.696692326 | 8.170694084 |
| Irak1  | 8.353987448 | 8.174186511 | 8.757001731 | 8.121128854 | 7.980606047 | 7.93150545  |
| Irak4  | 3.607234804 | 2.205919617 | 2.346809092 | 2.851100857 | 2.594940123 | 1.793876829 |
| Ireb2  | 11.11911381 | 10.87194537 | 11.02632336 | 11.04096008 | 11.18693852 | 10.9662694  |
| Irf3   | 8.154193484 | 8.161072823 | 8.342471581 | 7.788237489 | 7.495900972 | 7.93150545  |
| Irs4   | 6.256278888 | 5.910600739 | 5.038690263 | 5.866103848 | 5.905210499 | 5.477553384 |
| Irx3   | 7.019317849 | 6.956402762 | 6.415292686 | 6.229147667 | 6.262476989 | 6.881773285 |
| Isl1   | 8.504762638 | 8.405845235 | 8.402929735 | 8.104821966 | 8.062861048 | 8.118325412 |
| Isl2   | 5.059341058 | 4.03344674  | 1.825170741 | 1           | 2.594940123 | 2.67860439  |
| Itdb5  | 7.168221945 | 7.05185351  | 6.540180369 | 6.434481791 | 6.599593485 | 6.538882047 |
| Itm2a  | 7.593924365 | 7.643759998 | 7.230500702 | 7.774557194 | 7.584639817 | 6.968852843 |
| Itm2c  | 9.215279113 | 9.353399375 | 9.178079794 | 9.011923365 | 9.104115863 | 9.143389375 |
| Jag1   | 8.94406327  | 8.780678523 | 8.777444392 | 8.812146937 | 8.609810382 | 8.684467147 |
| Jam2   | 9.048097935 | 8.98796917  | 8.880259361 | 9.049329502 | 8.931753854 | 9.034561557 |
| Jam3   | 8.950932689 | 8.820840478 | 8.797601428 | 8.607455169 | 8.602328401 | 8.375809226 |
| Jarid2 | 10.02489904 | 9.917526212 | 10.31496302 | 9.982597549 | 10.02520683 | 10.06578516 |
| Jazf1  | 7.743847311 | 7.787224452 | 7.259855879 | 7.739777923 | 7.817862347 | 7.716843444 |
| Josd1  | 8.694076732 | 8.535987045 | 8.205856719 | 8.359709005 | 8.297161428 | 8.572143824 |
| Jph2   | 1.476947654 | 1.40785378  | 1           | 2.030760869 | 3.427188559 | 3.22300096  |
| Jup    | 8.377972821 | 8.530898714 | 8.522805096 | 8.327278922 | 8.415732159 | 8.28370345  |
| Kansl2 | 8.960041328 | 9.051529432 | 9.107170597 | 8.867968299 | 8.668309087 | 8.54405996  |
| Kat6a  | 11.1827457  | 11.09260774 | 11.49370274 | 11.15622206 | 11.15319929 | 11.14891136 |
| Kcna4  | 6.6087826   | 6.978997016 | 5.994117534 | 6.85422089  | 7.191323905 | 6.789098145 |
| Kcna6  | 7.88443884  | 7.816792302 | 7.583828927 | 7.32689167  | 7.533103826 | 7.736830824 |
| Kcnc1  | 8.652541711 | 8.782820417 | 8.422532248 | 8.750588791 | 8.895481508 | 8.890325857 |
| Kcne2  | 5.868356087 | 5.830037047 | 5.994117534 | 5.813557456 | 5.495401678 | 5.776850189 |
| Kcnh1  | 6.100248163 | 6.194223517 | 6.189834702 | 5.989661022 | 6.383814838 | 6.207605066 |
| Kcnip1 | 7.50958588  | 7.816792302 | 7.200535793 | 7.5993972   | 7.860301472 | 8.095286392 |
| Kcnj11 | 5.568285206 | 6.016328018 | 6.44115009  | 6.229147667 | 6.452002941 | 6.769826698 |
| Kcnn3  | 7.331536226 | 7.770052417 | 7.86742339  | 7.880530849 | 7.696619933 | 8.235347278 |

|           |             |             |             |             |             |             |
|-----------|-------------|-------------|-------------|-------------|-------------|-------------|
| Kcnq3     | 8.146234916 | 8.271967317 | 8.167646663 | 8.110278101 | 8.214511904 | 8.33049125  |
| Kcnq5     | 5.092852815 | 5.318260347 | 4.652620793 | 5.450355447 | 6.04423294  | 5.814955531 |
| Kcp       | 6.500576958 | 7.134686327 | 7.106715447 | 7.126078702 | 6.77843274  | 6.750294335 |
| Kctd12    | 9.377034031 | 9.505105441 | 9.299666387 | 9.404992002 | 9.591071113 | 9.909465686 |
| Kdelr1    | 8.189473526 | 7.829281054 | 8.0715893   | 7.880530849 | 7.917693995 | 7.948745976 |
| Kdelr3    | 5.307880412 | 5.672612041 | 4.246285218 | 5.011224712 | 5.157057049 | 5.327464956 |
| Kdm1b     | 8.814468713 | 8.901905161 | 8.856435913 | 8.970524722 | 8.856178116 | 8.951473019 |
| Kdm2a     | 10.3237364  | 10.31464886 | 10.51081757 | 10.21179121 | 10.19316489 | 10.18515261 |
| Kdm3a     | 10.27894397 | 10.22769763 | 10.24878881 | 10.14424897 | 10.15105095 | 9.974039779 |
| Kdm5d     | 1           | 1           | 1           | 1           | 9.755248875 | 9.90284642  |
| Kdm6a     | 10.0019301  | 9.89096484  | 10.1365558  | 9.65691524  | 9.294116475 | 9.209250084 |
| Kdm6b     | 9.045960774 | 9.13102156  | 9.509742382 | 9.50572331  | 8.969077051 | 9.683533126 |
| Khsrp     | 10.12750211 | 9.880001762 | 10.19850884 | 9.825614073 | 9.665955392 | 10.08345433 |
| Kidins220 | 12.68152014 | 12.76560745 | 12.70377767 | 12.74056136 | 12.75162011 | 12.85262738 |
| Kif11     | 10.47991871 | 10.36340891 | 10.45321394 | 10.36684704 | 10.24132805 | 10.12954075 |
| Kif15     | 9.694687539 | 9.473628949 | 9.601458241 | 9.375841913 | 9.514745503 | 9.054606944 |
| Kif18a    | 8.36431576  | 8.055186002 | 7.977539161 | 7.930734648 | 7.826450633 | 7.756545074 |
| Kif20a    | 8.826969347 | 8.730516349 | 8.908337734 | 8.552401406 | 8.386990494 | 8.497956714 |
| Kif21a    | 11.56984865 | 11.55790678 | 11.65084755 | 11.51873098 | 11.51045234 | 11.5422578  |
| Kif21b    | 12.02959609 | 12.11444412 | 12.57467079 | 12.21598784 | 12.13041119 | 12.39108646 |
| Kif22     | 8.454086807 | 8.357803784 | 8.688488764 | 8.0938474   | 8.253246977 | 7.851267163 |
| Kif23     | 9.043820443 | 8.678547025 | 8.949456506 | 8.785111498 | 8.738246871 | 8.297226941 |
| Kif26b    | 9.400642383 | 9.34182373  | 9.090928239 | 9.240583044 | 9.276987105 | 9.440118324 |
| Kif27     | 6.573608143 | 6.194223517 | 5.228828563 | 6.146587985 | 6.275080428 | 5.613488471 |
| Kif2a     | 10.12345401 | 9.937852183 | 10.00404763 | 10.05370086 | 10.10767059 | 10.07169896 |
| Kif2c     | 8.598153606 | 8.331707257 | 8.498382661 | 8.194881497 | 8.077325398 | 7.965782904 |
| Kif3b     | 9.344363391 | 9.433292307 | 9.405244375 | 9.520141784 | 9.370980419 | 9.668002394 |
| Kifc1     | 7.73326071  | 7.380782922 | 7.560426231 | 7.168539773 | 7.087968895 | 7.002264399 |
| Kirrel3   | 8.275899006 | 8.103970274 | 8.235712449 | 8.503480383 | 8.339778551 | 8.323899464 |
| Kitl      | 9.100523226 | 9.183845572 | 9.204741002 | 9.091318683 | 9.424287895 | 9.302725401 |
| Klc1      | 11.43752537 | 11.51860474 | 11.36538193 | 11.38670066 | 11.32061071 | 11.43011089 |
| Klf12     | 9.857081979 | 9.889971632 | 10.08828016 | 9.995922792 | 9.965223504 | 9.939960272 |
| Klf13     | 8.731792711 | 8.578528251 | 9.127219725 | 8.725921758 | 8.572006308 | 8.694722238 |
| Klhdc9    | 5.307880412 | 5.926187346 | 5.448709844 | 6.381316533 | 5.937282724 | 5.991704972 |
| Klhl42    | 8.485967179 | 8.302146483 | 8.307755651 | 7.91834653  | 8.237233561 | 8.095286392 |
| Klhl8     | 8.138232202 | 8.196852492 | 8.220861814 | 8.184573446 | 8.303327208 | 7.869487519 |
| Kmt2a     | 11.65749627 | 11.5506973  | 11.93527158 | 11.62594226 | 11.62441774 | 11.71215418 |
| Kmt2d     | 11.25760797 | 11.18052604 | 11.7407811  | 11.37030891 | 11.11032411 | 11.50194765 |
| Kmt2e     | 11.05626629 | 10.94357828 | 11.31819707 | 11.12016812 | 11.12736676 | 11.10633311 |
| Kndc1     | 8.072560314 | 8.352045214 | 8.243080832 | 8.355120529 | 8.404304112 | 8.63206889  |
| Knstrn    | 8.789137729 | 8.525792373 | 8.736265233 | 8.66419935  | 8.278504386 | 8.343585151 |
| Kntc1     | 9.211470278 | 8.85788425  | 9.099072276 | 8.791918003 | 8.798417175 | 8.599691423 |
| Kpna2     | 9.752186231 | 9.526992951 | 9.794355633 | 9.369030495 | 9.384129534 | 9.279066536 |
| Kpna3     | 10.08024869 | 9.963571717 | 10.08623319 | 10.0831327  | 10.03635479 | 10.06578516 |
| Kpna4     | 9.728395251 | 9.657619481 | 9.67684901  | 9.562552257 | 9.702571912 | 9.623068404 |
| Kpnb1     | 11.8644812  | 11.77707681 | 11.90771753 | 11.7145833  | 11.70551174 | 11.61897591 |
| Kras      | 10.12750211 | 9.994396497 | 10.04888224 | 10.0621714  | 10.15787234 | 10.10860039 |

|         |             |             |             |             |             |             |
|---------|-------------|-------------|-------------|-------------|-------------|-------------|
| Krit1   | 9.780741185 | 9.631710446 | 9.536975512 | 9.482770488 | 9.663560816 | 9.358617304 |
| Krt18   | 4.009405591 | 3.913456893 | 4.46371154  | 4.302518316 | 3.597423784 | 4.901186937 |
| L1cam   | 11.07263042 | 11.19547613 | 11.22079617 | 11.15951526 | 11.16763498 | 11.28663839 |
| L3mbtl2 | 7.820863442 | 7.643759998 | 7.76877001  | 7.535942998 | 7.715237468 | 7.534744676 |
| Lama1   | 9.241663061 | 9.223809287 | 9.355122062 | 9.066272104 | 9.162941098 | 8.942894789 |
| Lama2   | 8.223911375 | 7.940907639 | 8.054939026 | 7.535942998 | 7.984448429 | 7.726871747 |
| Lama4   | 9.035227223 | 8.927299847 | 8.83708979  | 8.785111498 | 8.733688366 | 8.867843915 |
| Lamb1   | 9.458026451 | 9.430562671 | 9.431280882 | 9.032185563 | 9.378300273 | 9.25847405  |
| Lamb2   | 8.829456528 | 8.859914612 | 8.79258851  | 8.524066114 | 8.527928886 | 8.444266158 |
| Lamc3   | 7.651283602 | 7.500144332 | 7.72733891  | 7.199585062 | 7.137123938 | 6.968852843 |
| Lamtor3 | 8.042861293 | 7.76572728  | 7.462823734 | 7.5993972   | 7.813548956 | 7.173357913 |
| Lancl1  | 9.098462387 | 9.063912233 | 8.971803824 | 8.906110372 | 8.94364477  | 8.835768745 |
| Laptm4b | 7.324500472 | 7.05185351  | 7.18531667  | 7.059947778 | 7.177963611 | 6.750294335 |
| Larp6   | 5.519829329 | 5.431808275 | 5.448709844 | 5.759024621 | 6.101966287 | 5.958045085 |
| Las1l   | 8.080934653 | 7.948559978 | 8.152074704 | 8.163733725 | 7.972890444 | 8.492088822 |
| Lbr     | 9.323341477 | 9.159324943 | 9.401956522 | 9.091318683 | 8.800598223 | 8.925583776 |
| Lca5l   | 5.157627734 | 4.710205239 | 5.104893407 | 5.057148905 | 5.014011403 | 4.293477201 |
| Lcor    | 9.276715131 | 9.030051325 | 9.331122063 | 9.074669371 | 9.221090734 | 9.10929611  |
| Lcorl   | 10.04001099 | 10.00360878 | 9.975578045 | 9.915619154 | 10.14161856 | 10.1351994  |
| Ldha    | 10.32638023 | 10.19026556 | 10.36647518 | 10.10925382 | 9.931784607 | 9.992861547 |
| Ldlr    | 8.326078235 | 8.253552067 | 8.300711082 | 8.008763986 | 7.945556175 | 8.125924044 |
| Ldlrad3 | 8.473299442 | 8.556162781 | 8.587910159 | 8.507621095 | 8.410029451 | 8.432058627 |
| Lect1   | 3.298059683 | 3.093258183 | 1.825170741 | 1.605542449 | 1.418787199 | 1.793876829 |
| Lefty2  |             | 1           | 1           | 1           | 1.605542449 | 2.747440291 |
| Lekr1   | 5.660571873 | 5.762181547 | 4.969302427 | 5.61292943  | 6.087748098 | 5.814955531 |
| Lemd2   | 8.48911681  | 8.275013802 | 8.416027626 | 7.89324653  | 8.112864261 | 8.03198727  |
| Lepr    | 6.665565543 | 6.168242543 | 5.76761879  | 6.146587985 | 6.418311711 | 6.468905804 |
| Lfng    | 8.034262341 | 7.833420063 | 8.112393197 | 7.637684005 | 7.354607166 | 7.299667279 |
| Lgals1  | 7.81082909  | 7.782950567 | 7.662872168 | 7.575927714 | 7.066378704 | 7.286166751 |
| Lgr6    | 2.744494966 | 2.56572585  |             | 1           | 2.851100857 | 3.126983752 |
| Lhfp    | 7.490853563 | 7.505342099 | 7.572175032 | 7.426478983 | 7.14401134  | 7.488337929 |
| Lhfpl2  | 8.05990695  | 8.219167872 | 7.932674443 | 8.099345118 | 8.123357421 | 7.686333379 |
| Lhfpl3  | 5.809101408 | 5.616073469 | 4.359090506 | 5.840069872 | 5.821764658 | 6.5159317   |
| Lhx2    | 10.0760656  | 9.933038577 | 10.33923108 | 9.954055687 | 9.70839173  | 9.971933233 |
| Lhx9    | 9.704205356 | 9.762276875 | 9.819217623 | 9.470095124 | 9.781987483 | 9.82795665  |
| Lifr    | 8.904506365 | 8.595687029 | 8.441871979 | 8.588033395 | 8.665918417 | 8.549720638 |
| Lig4    | 7.465492678 | 7.595835205 | 7.905070272 | 7.552070109 | 7.864477522 | 7.77599356  |
| Lin52   | 7.168221945 | 7.161273086 | 6.988941883 | 6.801231826 | 6.872665379 | 6.845414449 |
| Lin7c   | 11.06367953 | 11.00266226 | 11.02525532 | 11.02876671 | 11.06749473 | 11.16927877 |
| Lipo1   | 5.962006808 | 5.910600739 | 6.415292686 | 6.229147667 | 6.463060749 | 6.395361653 |
| Llgl1   | 10.26890018 | 10.05502435 | 10.349508   | 10.02365607 | 9.82226242  | 9.980341025 |
| Lmnb1   | 10.83833982 | 10.68475571 | 10.92345095 | 10.74643198 | 10.5074409  | 10.57341052 |
| Lmo2    | 7.062244993 | 7.281271817 | 6.898513064 | 7.136811703 | 7.15768828  | 7.3781203   |
| Lmo3    | 8.930225521 | 8.99167761  | 8.989435741 | 8.988412655 | 9.022377451 | 9.216385743 |
| Lmo7    | 5.363857532 | 6.030818731 | 5.342954171 | 5.730965216 | 6.143798956 | 6.730493894 |
| Lnp     | 9.905034288 | 9.59804774  | 9.657678367 | 9.788659382 | 9.948600934 | 9.792586783 |
| Lonrf2  | 9.841147916 | 9.94933973  | 10.00621451 | 9.958600006 | 10.19233454 | 10.03584698 |

|         |             |             |             |             |             |             |
|---------|-------------|-------------|-------------|-------------|-------------|-------------|
| Lonrf3  | 7.206995492 | 6.474193269 | 6.740890878 | 6.229147667 | 6.724314878 | 6.024597402 |
| Loxl2   | 5.868356087 | 5.495880869 | 5.104893407 | 5.64335602  | 5.157057049 | 5.159929718 |
| Lpar1   | 7.805785619 | 7.6578324   | 7.789047758 | 7.674980951 | 7.599748339 | 7.77599356  |
| Lppr4   | 6.561690132 | 7.375115526 | 7.18531667  | 7.136811703 | 7.463230973 | 7.339427003 |
| Lrch2   | 9.314491128 | 9.16754488  | 9.368659195 | 9.391611263 | 9.541073527 | 9.491021516 |
| Lrfn4   | 9.157063004 | 9.142743218 | 8.980646719 | 9.009005394 | 8.724527918 | 9.066501836 |
| Lrp1    | 12.58325676 | 12.66512444 | 12.71607497 | 12.5997759  | 12.59958522 | 12.66782661 |
| Lrp11   | 8.381366981 | 8.231766236 | 8.205856719 | 8.088328651 | 8.157793459 | 8.388499989 |
| Lrp4    | 9.698774295 | 9.801891466 | 10.0446718  | 9.645686781 | 9.57841547  | 9.683533126 |
| Lrp5    | 8.05990695  | 7.83754723  | 8.257705651 | 7.560066561 | 7.553939654 | 7.655164122 |
| Lrp8    | 11.04346856 | 11.08090509 | 11.41270682 | 11.20229531 | 11.21990671 | 11.37298598 |
| Lrpap1  | 9.035227223 | 9.241048598 | 9.216018112 | 9.049329502 | 8.972950221 | 9.026464761 |
| Lrrc14  | 7.81585499  | 7.595835205 | 7.606858048 | 7.229976337 | 7.32460857  | 7.244890188 |
| Lrrc17  | 4.432277612 | 4.388824542 | 4.652620793 | 5.186752068 | 4.714236588 | 4.671251885 |
| Lrrc48  | 5.494977093 | 4.673735516 | 5.228828563 | 3.85969309  | 4.235739691 | 4.585672437 |
| Lrrc7   | 9.9808288   | 10.38612831 | 10.18518211 | 10.28115792 | 10.24773659 | 10.36607505 |
| Lrrc75b | 7.274265369 | 7.441697696 | 7.706168466 | 7.725628009 | 7.677759001 | 7.878512125 |
| Lrrtm4  | 6.910760951 | 7.6578324   | 7.288625645 | 7.136811703 | 7.538341062 | 7.47649919  |
| Lsamp   | 7.310325184 | 7.56629706  | 7.651841978 | 7.955196258 | 8.137230627 | 8.141002287 |
| Lsm11   | 8.934852867 | 8.787094687 | 8.958437015 | 8.682628715 | 9.061098999 | 8.951473019 |
| Lsm12   | 7.136434895 | 7.073011828 | 7.006366839 | 7.002424395 | 6.99198465  | 7.352440416 |
| Lsm14a  | 9.199983065 | 9.011905367 | 9.158729833 | 9.003151687 | 9.075580937 | 9.022399259 |
| Lsm8    | 7.972590348 | 7.91380022  | 7.876927609 | 7.854758244 | 7.864477522 | 7.832813749 |
| Ltbp1   | 7.898720599 | 8.00101911  | 8.409493545 | 7.880530849 | 7.961239115 | 7.590729603 |
| Luc7l2  | 10.85002385 | 10.83732792 | 11.12434249 | 11.02443844 | 10.96815211 | 10.86887594 |
| Lum     | 7.459082181 | 7.256825073 | 7.023583845 | 7.037212907 | 6.822030152 | 6.468905804 |
| Luzp1   | 9.839914898 | 9.677326189 | 9.884280488 | 9.693724561 | 9.623465456 | 9.427875497 |
| Luzp2   | 8.421485998 | 8.497379785 | 7.986347078 | 8.359709005 | 8.582184648 | 8.867843915 |
| Lyar    | 7.222217761 | 7.45250199  | 7.302798206 | 7.048625126 | 6.968897231 | 6.710417912 |
| Lypd6b  | 4.67286394  | 4.780490277 | 3.493254909 | 4.914743422 | 5.451659813 | 5.217963548 |
| Lyve1   | 5.46968923  | 5.142596755 | 4.896407951 | 4.699958789 | 5.359984332 | 4.671251885 |
| Lzts2   | 8.388131439 | 8.200061614 | 8.321742427 | 7.979250015 | 7.791786408 | 7.766302089 |
| Lzts3   | 7.576262265 | 7.551298059 | 7.76877001  | 7.997030751 | 7.262672602 | 8.125924044 |
| Mad2l1  | 7.972590348 | 7.624780691 | 8.314765989 | 7.753790403 | 7.696619933 | 7.686333379 |
| Maged2  | 10.11634238 | 10.15679958 | 10.06560215 | 10.08728866 | 9.978770316 | 9.988700102 |
| Magoh   | 8.227687548 | 8.141176048 | 8.250411773 | 8.054765339 | 7.909633529 | 7.644622906 |
| Malat1  | 16.82095864 | 16.78056542 | 16.91348043 | 16.86620672 | 16.85366015 | 16.86659469 |
| Mamdc4  | 7.785433554 | 7.808405999 | 7.77894451  | 7.469568968 | 7.116262226 | 7.452526219 |
| Maml1   | 8.322551313 | 8.187182071 | 8.441871979 | 7.91834653  | 7.945556175 | 8.03198727  |
| Man2c1  | 8.589375434 | 8.692285755 | 8.655735526 | 8.294103054 | 8.699032582 | 8.444266158 |
| Map1b   | 14.92620803 | 14.99437093 | 15.20629489 | 15.05129011 | 15.02543874 | 15.12585957 |
| Map2    | 13.20474637 | 13.32897204 | 13.36961963 | 13.28501952 | 13.37248985 | 13.47540978 |
| Map2k3  | 6.643119837 | 6.42017804  | 6.127499866 | 5.550080729 | 5.838844419 | 5.888273572 |
| Map2k4  | 9.092262148 | 9.033653289 | 8.894366855 | 9.14812319  | 9.275419757 | 9.124548224 |
| Map2k5  | 7.940736694 | 7.571262274 | 7.932674443 | 7.591616383 | 7.614700277 | 7.686333379 |
| Map3k13 | 8.609775365 | 8.561162936 | 8.460955881 | 8.611308345 | 8.541033209 | 8.826471886 |
| Map3k5  | 5.829124602 | 5.690976344 | 4.246285218 | 5.517598924 | 5.495401678 | 5.273752905 |

|          |             |             |             |             |             |             |
|----------|-------------|-------------|-------------|-------------|-------------|-------------|
| Map3k7   | 10.11939451 | 10.06913342 | 10.05308042 | 9.995922792 | 10.11118943 | 10.15018151 |
| Map3k8   | 2.744494966 | 2.56572585  | 1.825170741 | 1.605542449 | 2.885350385 | 2.976330056 |
| Map4k4   | 12.18528392 | 12.17298008 | 12.43728757 | 12.24138465 | 12.17963166 | 12.27285956 |
| Map7     | 6.032782666 | 5.364757319 | 5.287019574 | 4.914743422 | 5.473696519 | 5.697480352 |
| Map9     | 9.697413329 | 9.882999964 | 9.774152877 | 9.800520688 | 9.936750966 | 10.00938832 |
| Mapk10   | 9.966211161 | 9.948385921 | 9.914590529 | 10.0663881  | 10.04741726 | 10.17603157 |
| Mapk6    | 10.67369606 | 10.5610491  | 10.86256355 | 10.69742926 | 10.69205486 | 10.64125946 |
| Mapk7    | 9.030911342 | 9.119203886 | 9.166500989 | 8.864743803 | 8.724527918 | 8.774239848 |
| Mapk8    | 10.59036048 | 10.58026416 | 10.66825953 | 10.59412881 | 10.54760121 | 10.69205177 |
| Mapre2   | 9.44186258  | 9.506402174 | 9.684987654 | 9.530353177 | 9.702571912 | 9.751423825 |
| Mapt     | 12.01109121 | 12.15531604 | 12.20517947 | 12.1745948  | 12.09041294 | 12.34218179 |
| 6-Mar    | 11.44362634 | 11.47124613 | 11.45852848 | 11.34160238 | 11.57430792 | 11.48579815 |
| 9-Mar    | 7.999344653 | 8.131123803 | 8.190693919 | 7.821881231 | 7.949492922 | 8.110686546 |
| Marcks   | 12.76671825 | 12.6389077  | 12.62277351 | 12.67372899 | 12.78339646 | 12.74294329 |
| Marveld1 | 5.829124602 | 5.744707001 | 6.189834702 | 5.379823897 | 5.262085683 | 4.828538958 |
| Mast4    | 9.499224104 | 9.543509231 | 9.256629333 | 9.442243721 | 9.535846219 | 9.773362192 |
| Mastl    | 7.870014287 | 7.6578324   | 7.72733891  | 7.711337936 | 7.452174475 | 7.339427003 |
| Matn1    | 1           | 1.40785378  | 1           | 1           | 1.742960444 | 1           |
| Matn2    | 6.285557633 | 6.386770728 | 6.306963417 | 5.415520654 | 6.40690416  | 6.263788702 |
| Matn3    | 1           | 1.40785378  | 1           | 1.605542449 | 2.424393538 | 1           |
| Matn4    | 1           | 1.40785378  | 1           | 1           | 2.424393538 | 1           |
| Matr3    | 12.64527466 | 12.71168056 | 12.59712679 | 12.63616287 | 12.72114443 | 12.70982931 |
| Mbd6     | 7.484555014 | 7.200256538 | 8.128397009 | 7.725628009 | 7.224193168 | 7.766302089 |
| Mblac2   | 7.103931669 | 7.065993477 | 6.761561469 | 7.037212907 | 6.976634162 | 7.158615784 |
| Mbnl3    | 6.585428507 | 5.910600739 | 6.189834702 | 6.081411933 | 6.073388388 | 5.217963548 |
| Mbtd1    | 10.37145315 | 10.41126713 | 10.64202286 | 10.44880784 | 10.44467455 | 10.41186055 |
| Mbtps2   | 7.94990973  | 7.882183508 | 7.941759697 | 8.104821966 | 8.452260234 | 8.41974692  |
| Mc4r     | 3.178288549 | 5.364757319 | 3.842769234 | 4.863970092 | 5.804480268 | 5.217963548 |
| Mcemp1   | 3.047666507 | 1.985596612 | 2.72911076  | 1           | 1.418787199 | 1           |
| Mcm3     | 9.0963986   | 9.011905367 | 9.174230508 | 8.988412655 | 8.661125159 | 8.610564849 |
| Mcm5     | 9.423870619 | 9.165904635 | 9.569577112 | 9.260349096 | 8.94364477  | 8.807696486 |
| Mcm7     | 10.29792645 | 10.10638174 | 10.37823458 | 10.08174471 | 9.969107019 | 9.961354116 |
| Mdc1     | 9.209562083 | 9.172454456 | 9.618555504 | 9.248027085 | 9.137283968 | 9.209250084 |
| Mdga2    | 8.577587497 | 8.641257626 | 8.314765989 | 8.656761177 | 8.776423411 | 8.793452825 |
| Mdh2     | 9.252824414 | 9.312471633 | 9.456855823 | 9.110503108 | 9.135557159 | 9.32929739  |
| Mdk      | 9.125026374 | 9.015552863 | 9.39866116  | 9.006081509 | 8.965193455 | 8.845006077 |
| Mdm2     | 9.483517767 | 9.349069385 | 9.256629333 | 9.296695988 | 9.336822321 | 9.010133557 |
| Med12    | 9.849749658 | 9.65411371  | 10.1106072  | 9.693724561 | 9.608604552 | 9.773362192 |
| Med13    | 11.29498142 | 11.28433193 | 11.45931952 | 11.30816466 | 11.46854368 | 11.46497928 |
| Med14    | 10.17619097 | 10.04345825 | 10.33578911 | 10.04090106 | 10.10590795 | 10.03382884 |
| Med9os   | 2.121272526 | 2.853470894 | 1.825170741 | 4.053408608 | 3.749675008 | 3.617319577 |
| Mef2c    | 9.194204976 | 9.220652613 | 9.057884423 | 9.431386827 | 9.482504238 | 9.528770572 |
| Meg3     | 12.77173827 | 12.79853105 | 12.99886909 | 13.06438292 | 12.95757358 | 13.29654324 |
| Megf11   | 8.204880811 | 8.46306353  | 8.22830624  | 8.322585966 | 8.36652511  | 8.679312136 |
| Megf6    | 7.722595849 | 7.414327574 | 7.572175032 | 7.30802245  | 7.177963611 | 6.951852343 |
| Megf8    | 10.41184497 | 10.30126336 | 10.30795364 | 10.31699073 | 10.13644751 | 10.37566787 |
| Melk     | 8.016909134 | 7.721747423 | 7.932674443 | 7.801789279 | 7.609733496 | 7.557400011 |



|             |             |             |             |             |             |             |
|-------------|-------------|-------------|-------------|-------------|-------------|-------------|
| Mesdc1      | 7.02800607  | 7.346439705 | 7.512450212 | 7.229976337 | 7.171236778 | 6.968852843 |
| Mettl17     | 7.50958588  | 7.735082723 | 7.629525334 | 7.64522093  | 7.527847509 | 7.50008031  |
| Mex3a       | 11.3084163  | 11.28584298 | 11.49138428 | 11.33287784 | 11.24454826 | 11.3366108  |
| Mex3b       | 10.34214226 | 10.26877499 | 10.46901067 | 10.24441239 | 10.12256673 | 10.27161358 |
| Mex3d       | 9.889623929 | 9.769855433 | 9.725006114 | 9.446563705 | 9.400039607 | 9.387353199 |
| Mfap1b      | 5.443950196 | 5.22051385  | 4.561255977 | 5.379823897 | 4.952570441 | 5.036351157 |
| Mfge8       | 7.76479027  | 8.275013802 | 8.10432422  | 8.12652378  | 8.102294222 | 8.276893869 |
| Mfng        | 8.201044388 | 8.137833076 | 8.264962838 | 7.997030751 | 7.88928311  | 7.982620987 |
| Mfsd2b      | 5.615166341 | 5.387455657 | 5.807924923 | 5.011224712 | 4.952570441 | 4.397591105 |
| Mgap        | 2.36018646  | 2.853470894 | 1.825170741 | 2.030760869 | 2.230948887 | 1           |
| Mgll        | 5.660571873 | 6.232338222 | 5.396800833 | 5.840069872 | 5.804480268 | 5.524302751 |
| Mgmt        | 3.861704164 | 1.725454411 | 3.842769234 | 1.605542449 | 1.418787199 | 2.303023309 |
| Mgp         | 2.36018646  | 1.40785378  | 1.825170741 | 1           | 1.742960444 | 1.793876829 |
| Mgst1       | 6.032782666 | 5.65401096  | 5.228828563 | 5.267106973 | 5.619191772 | 5.327464956 |
| Mia         | 2.744494966 | 3.39155842  | 3.842769234 | 2.358763209 | 2.885350385 | 1.793876829 |
| Miat        | 13.54890444 | 13.44990696 | 13.62871103 | 13.52477645 | 13.37907251 | 13.50612277 |
| Mib2        | 8.739748004 | 8.810379461 | 8.599438142 | 8.507621095 | 8.629574683 | 8.52119249  |
| Midn        | 10.15453368 | 9.901845237 | 10.47058088 | 10.17971338 | 9.886300852 | 10.09123837 |
| Mier1       | 8.887897636 | 8.793482441 | 8.967361967 | 9.063462118 | 9.119922161 | 9.097750267 |
| Mif         | 9.834972263 | 9.662280629 | 9.804351901 | 9.546542545 | 9.420038293 | 9.58222412  |
| Mir1251     | 3.93744424  | 2.716760345 | 3.990174756 | 3.85969309  | 4.128701845 | 4.059575235 |
| Mir181c     | 3.511354355 | 2.56572585  | 1.825170741 | 1.605542449 | 1           | 1           |
| Mir1898     | 4.143380003 | 3.093258183 | 2.72911076  | 3.635872179 | 3.514815644 | 3.433590479 |
| Mir215      | 1           | 1.40785378  | 1           | 2.030760869 | 2.007489679 | 3.22300096  |
| Mir3072     | 3.861704164 | 2.56572585  | 1.825170741 | 3.045898796 | 2.885350385 | 4.059575235 |
| Mir341      | 3.607234804 | 3.298813141 | 2.72911076  | 3.217496026 | 3.514815644 | 3.780271631 |
| Mir6541     | 2.744494966 | 2.716760345 | 2.72911076  | 1           | 1.418787199 | 1           |
| Mir709      | 1.476947654 | 1.985596612 | 1.825170741 | 3.635872179 | 3.126983752 | 2.976330056 |
| Mir7659     | 2.121272526 | 1           | 1           | 1           | 1.418787199 | 1.793876829 |
| Mir7675     | 2.36018646  | 2.716760345 | 1.825170741 | 2.030760869 | 2.594940123 | 1           |
| Mis18bp1    | 8.683117123 | 8.551145237 | 9.032595206 | 8.708040605 | 8.498673414 | 8.297226941 |
| Mki67       | 12.39228319 | 12.28639774 | 12.72826833 | 12.27578064 | 12.15320588 | 12.19282031 |
| Mkl2        | 8.66094493  | 8.666997287 | 8.62222139  | 8.754078474 | 8.778637937 | 8.826471886 |
| Mmd         | 9.182578907 | 9.245714695 | 9.256629333 | 9.294301144 | 9.373912819 | 9.285865894 |
| Mmd2        | 8.360881198 | 8.334630292 | 8.152074704 | 8.184573446 | 8.224293608 | 8.663735651 |
| Mme         | 6.148854342 | 5.57711136  | 5.498815825 | 6.013151561 | 5.359984332 | 5.217963548 |
| Mmgt1       | 9.604626349 | 9.623368119 | 9.421572173 | 9.486970981 | 9.541073527 | 9.41862471  |
| Mmp2        | 6.462626536 | 6.672049976 | 6.677040407 | 6.399256858 | 6.517113106 | 6.5159317   |
| Mmp24       | 8.937160986 | 9.093549546 | 8.827318565 | 9.192523952 | 8.990251947 | 9.090001383 |
| Mnd1        | 2.121272526 | 2.853470894 | 1           | 1.605542449 | 3.675556897 | 4.059575235 |
| Mns1        | 6.62031939  | 6.752939307 | 6.632847408 | 6.535272723 | 6.116045717 | 6.444805259 |
| Mob3b       | 6.256278888 | 6.059370691 | 6.516052763 | 6.468867128 | 6.324421177 | 6.088214528 |
| Morf4l1-ps1 | 5.615166341 | 5.796508198 | 6.189834702 | 6.416976829 | 6.223992267 | 6.369989537 |
| Moxd1       | 3.408645243 | 3.199693499 | 2.72911076  | 3.509431521 | 4.382735357 | 4.059575235 |
| Mpc2        | 7.68463547  | 7.441697696 | 7.245252952 | 7.168539773 | 7.47420338  | 7.244890188 |
| Mpdz        | 10.54719293 | 10.51990893 | 10.8237757  | 10.47442005 | 10.3753994  | 10.34669592 |
| Mphosph9    | 9.462840508 | 9.28099539  | 9.539969925 | 9.240583044 | 9.376839271 | 9.176695524 |

|        |             |             |             |             |             |             |
|--------|-------------|-------------|-------------|-------------|-------------|-------------|
| Mpnd   | 9.502344956 | 9.362020562 | 9.524935319 | 9.14812319  | 9.234059317 | 9.499820917 |
| Mpped1 | 8.85653621  | 9.468315447 | 9.447318271 | 9.240583044 | 9.455074943 | 9.636430179 |
| Mpped2 | 9.623380667 | 9.482880747 | 9.709131687 | 9.238093137 | 9.44395552  | 9.545865568 |
| Mpz    | 3.047666507 | 2.56572585  | 1           | 1           | 1           | 1.793876829 |
| Mrc2   | 7.990481565 | 7.605548371 | 8.054939026 | 7.828516844 | 7.742720901 | 7.766302089 |
| Mrpl24 | 7.908163826 | 7.76572728  | 7.640726807 | 7.08232993  | 7.40708114  | 7.428148153 |
| Mrpl30 | 8.17389992  | 8.121001026 | 7.977539161 | 7.718500666 | 7.921707403 | 8.040053218 |
| Mrpl36 | 7.176060468 | 7.037573583 | 6.84140367  | 7.08232993  | 6.440859724 | 6.627197922 |
| Mrpl47 | 6.6087826   | 6.257199856 | 6.761561469 | 6.535272723 | 6.348472847 | 7.082557119 |
| Mrpl53 | 7.206995492 | 7.3053112   | 7.230500702 | 6.229147667 | 6.847569902 | 6.5159317   |
| Mrps16 | 6.975074141 | 6.933449019 | 6.781940076 | 6.416976829 | 6.171028365 | 6.291080771 |
| Mrps17 | 8.166049617 | 8.141176048 | 8.328685292 | 7.949119629 | 7.901527776 | 8.063983964 |
| Mrps24 | 7.324500472 | 7.479163946 | 7.37164492  | 6.814662667 | 7.080808005 | 6.769826698 |
| Msi1   | 9.215279113 | 8.936949232 | 9.627028749 | 9.255432913 | 8.858273628 | 9.139640778 |
| Msi2   | 11.15128055 | 11.05632603 | 11.27302047 | 11.1673884  | 11.11383649 | 11.20738122 |
| Msl2   | 9.780741185 | 9.692216461 | 9.921495639 | 9.81228527  | 9.898570749 | 9.675788658 |
| Msn    | 8.704953713 | 8.296160943 | 8.807575309 | 8.528148245 | 8.181418771 | 8.356561279 |
| Mta2   | 10.25693939 | 10.12676079 | 10.43241614 | 10.13491039 | 10.10414315 | 10.18515261 |
| Mta3   | 7.373045073 | 7.699244293 | 8.021050658 | 7.781413557 | 7.774136874 | 7.97422651  |
| Mtap   | 7.628612828 | 7.311258974 | 7.358135905 | 7.32689167  | 7.318533265 | 6.899614759 |
| Mtch1  | 10.68404022 | 10.64997717 | 10.67644663 | 10.63634065 | 10.51675736 | 10.64125946 |
| Mtf2   | 10.49644684 | 10.29602416 | 10.41458076 | 10.24068584 | 10.49940719 | 10.41806328 |
| Mtfmt  | 6.676658785 | 6.787483949 | 6.698639411 | 7.178962608 | 7.066378704 | 7.143721456 |
| Mthfsd | 7.893975704 | 7.870146295 | 7.330732364 | 7.5993972   | 7.14401134  | 7.2023978   |
| Mturn  | 10.39515226 | 10.49726081 | 10.340949   | 10.40730169 | 10.67194291 | 10.76199234 |
| Mxra7  | 6.314253981 | 6.442027408 | 6.334817815 | 5.64335602  | 5.3361254   | 5.923581073 |
| Mybl1  | 7.50336876  | 7.023150898 | 7.437355307 | 6.990639276 | 7.123249702 | 6.627197922 |
| Mybl2  | 6.87268094  | 6.971504846 | 7.006366839 | 6.518955674 | 6.429629768 | 6.149144468 |
| Mycbp2 | 12.45160957 | 12.51570027 | 12.42478718 | 12.43643961 | 12.55150669 | 12.61007609 |
| Mydgf  | 7.400068652 | 7.114419705 | 7.385028612 | 7.426478983 | 7.109240742 | 7.158615784 |
| Myh10  | 12.19471958 | 12.22471049 | 12.2956546  | 12.17361789 | 12.11581522 | 12.24521726 |
| Myh14  | 4.143380003 | 3.849499474 | 4.359090506 | 5.227488897 | 4.714236588 | 5.327464956 |
| Myh8   | 3.607234804 | 4.144218708 | 1           | 4.053408608 | 3.597423784 | 4.828538958 |
| Myl12a | 8.038568223 | 8.093654478 | 8.13633283  | 7.795029296 | 7.506628612 | 7.452526219 |
| Myl4   | 2.121272526 | 1.725454411 | 1.825170741 | 2.358763209 | 2.007489679 | 1.793876829 |
| Myl6   | 9.910917793 | 10.19590248 | 10.12264149 | 9.810610477 | 9.68378914  | 9.701443499 |
| Mylip  | 5.519829329 | 5.894843895 | 5.639468694 | 5.379823897 | 5.558624041 | 5.569584671 |
| Mylpf  | 2.904029779 | 2.853470894 | 3.280577348 | 2.851100857 | 3.333892988 | 1           |
| Myo10  | 9.753496518 | 9.693355526 | 9.791845706 | 9.638152295 | 9.612334154 | 9.511470581 |
| Myo1b  | 10.70586295 | 10.62333178 | 10.63503843 | 10.4292958  | 10.53717504 | 10.52394327 |
| Myo3b  | 2.36018646  | 2.978340632 | 3.031034773 | 3.85969309  | 4.473020427 | 3.617319577 |
| Myo9a  | 11.31730388 | 11.38434474 | 11.23009614 | 11.40012681 | 11.41758651 | 11.38411817 |
| Myod1  | 1           | 1           | 1           | 1           | 1           | 1           |
| Myof   | 4.989887769 | 5.65401096  | 6.062349611 | 5.227488897 | 5.014011403 | 3.926671999 |
| Myrfl  | 1           | 1.725454411 | 1           | 1.605542449 | 1.742960444 | 1           |
| Myrip  | 5.980028937 | 5.744707001 | 5.76761879  | 6.167675041 | 6.184452741 | 6.263788702 |
| Mzf1   | 5.591916194 | 5.796508198 | 6.09529247  | 5.101656215 | 5.21052692  | 4.671251885 |

|         |             |             |             |             |             |             |
|---------|-------------|-------------|-------------|-------------|-------------|-------------|
| Mzt1    | 9.353032914 | 9.220652613 | 9.405244375 | 9.200219474 | 9.300295254 | 9.205668975 |
| Naa15   | 10.43897256 | 10.31390847 | 10.46586513 | 10.42820402 | 10.54174576 | 10.29370831 |
| Naa20   | 7.903449939 | 7.925480107 | 7.462823734 | 7.985201309 | 7.843475333 | 7.766302089 |
| Naa30   | 9.382125588 | 9.334541501 | 9.181918836 | 9.387123296 | 9.551471664 | 9.41862471  |
| Naa40   | 9.100523226 | 8.984251173 | 9.166500989 | 8.733012623 | 8.874929044 | 8.637395189 |
| Naa50   | 9.54987429  | 9.165904635 | 9.074500935 | 9.235598925 | 9.491982599 | 9.223486283 |
| Naalad2 | 3.047666507 | 4.517872985 | 4.123905703 | 4.447508334 | 4.75079107  | 5.477553384 |
| Nadk    | 9.192273793 | 9.015552863 | 9.174230508 | 9.049329502 | 9.04094595  | 9.101609158 |
| Naf1    | 5.704591866 | 5.846513718 | 6.655113117 | 5.484368924 | 6.275080428 | 5.923581073 |
| Nalcn   | 8.64691225  | 8.825003737 | 8.335594904 | 8.822156023 | 8.780849069 | 9.101609158 |
| Nap1l2  | 7.840725169 | 8.03016098  | 7.818939792 | 7.828516844 | 8.077325398 | 8.170694084 |
| Nap1l5  | 7.639992746 | 7.91380022  | 7.385028612 | 7.936889044 | 8.08091894  | 8.486196965 |
| Napepld | 7.237281091 | 6.878425895 | 7.154388143 | 7.059947778 | 6.813415432 | 6.710417912 |
| Nasp    | 10.65208019 | 10.61193205 | 10.76740326 | 10.58827576 | 10.46887597 | 10.48754138 |
| Nav1    | 11.33622877 | 11.35080928 | 11.57696709 | 11.39342936 | 11.55602732 | 11.64035586 |
| Nav2    | 9.368507967 | 9.468315447 | 9.554849468 | 9.524235019 | 9.593588974 | 9.851063818 |
| Nav3    | 10.04857585 | 10.20151745 | 10.30267417 | 10.10789075 | 10.28637965 | 10.34181018 |
| Nbea    | 12.6022891  | 12.76601352 | 12.69675121 | 12.63119003 | 12.76634095 | 12.7894382  |
| Nbeal1  | 10.25416507 | 10.05944827 | 9.962246321 | 10.04802607 | 10.20720808 | 10.11815643 |
| Nbl1    | 6.369989055 | 6.087368536 | 5.594091143 | 5.61292943  | 5.677318849 | 6.119001134 |
| Ncald   | 8.595233479 | 8.692285755 | 8.183052337 | 8.715219683 | 8.97681302  | 8.929931042 |
| Ncam1   | 12.55573193 | 12.64008963 | 12.73089123 | 12.69861777 | 12.67001951 | 12.83361153 |
| Ncapd2  | 10.55848137 | 10.39945059 | 10.80398356 | 10.43800041 | 10.26046889 | 10.27332524 |
| Ncapg   | 8.826969347 | 8.669314643 | 8.672205092 | 8.457130482 | 8.43832021  | 8.310624842 |
| Ncapg2  | 9.026582512 | 8.87605545  | 9.249329998 | 8.896668974 | 8.854079556 | 8.689603805 |
| Ncaph   | 8.745027267 | 8.641257626 | 8.926757576 | 8.435559803 | 8.443912394 | 8.185313927 |
| Nckap1l | 4.916921051 | 5.088211387 | 4.738542537 | 5.786548686 | 5.184039686 | 4.901186937 |
| Ncl     | 10.99222167 | 10.79815818 | 11.28556342 | 11.11542779 | 11.02755083 | 11.14049565 |
| Ncln    | 8.463725107 | 8.543586049 | 8.746670738 | 8.21020678  | 8.102294222 | 7.905252094 |
| Ncoa5   | 9.467638554 | 9.384761661 | 9.758812957 | 9.336811623 | 9.348795347 | 9.41862471  |
| Ncoa6   | 9.58415296  | 9.46164593  | 10.08828016 | 9.745483276 | 9.619764556 | 9.85564117  |
| Ncs1    | 10.14158169 | 10.07962541 | 10.0446718  | 9.969148082 | 10.08458654 | 10.17053113 |
| Ndc1    | 8.322551313 | 8.090199423 | 8.205856719 | 7.886902698 | 7.778569541 | 7.842069961 |
| Ndc80   | 7.820863442 | 7.531053695 | 7.828767736 | 7.630107498 | 7.243561171 | 7.339427003 |
| Nde1    | 8.918591803 | 8.778533446 | 9.189566409 | 8.584117467 | 8.632026291 | 8.572143824 |
| Ndfip1  | 9.600263587 | 9.574749495 | 9.208509841 | 9.440078869 | 9.646686561 | 9.59322949  |
| Ndn     | 10.78935681 | 10.9421416  | 10.63643802 | 10.80984163 | 10.82603119 | 10.89579345 |
| Ndnf    | 6.488037412 | 6.986450479 | 6.09529247  | 6.892723325 | 6.751627551 | 7.272538694 |
| Ndnl2   | 7.103931669 | 7.037573583 | 7.200535793 | 6.717910076 | 6.847569902 | 6.317866116 |
| Ndrg1   | 6.561690132 | 7.044731214 | 7.398289287 | 7.269527091 | 6.91354482  | 7.002264399 |
| Ndrg4   | 9.430439141 | 9.43465519  | 9.29258211  | 9.422642099 | 9.496025769 | 9.654931168 |
| Ndst4   | 6.561690132 | 6.956402762 | 6.127499866 | 6.942511838 | 7.022204154 | 6.605620608 |
| Ndufa5  | 7.446175096 | 7.83754723  | 7.848225027 | 7.6675983   | 7.839237956 | 7.823497767 |
| Ndufs3  | 8.158156364 | 8.121001026 | 8.046541268 | 7.781413557 | 7.787394226 | 8.095286392 |
| Ndufs7  | 7.651283602 | 7.712788247 | 7.662872168 | 7.718500666 | 7.424156736 | 7.488337929 |
| Ndufv2  | 9.269406189 | 9.331618286 | 9.382070486 | 9.299086862 | 9.251702884 | 9.32929739  |
| Neat1   | 7.76479027  | 7.95617194  | 7.398289287 | 7.5993972   | 7.47420338  | 7.326295136 |

|          |             |             |             |             |             |             |
|----------|-------------|-------------|-------------|-------------|-------------|-------------|
| Necab1   | 5.660571873 | 5.672612041 | 5.342954171 | 6.208946435 | 6.40690416  | 6.492610349 |
| Nefl     | 9.99972339  | 9.899873077 | 8.958437015 | 9.497419019 | 9.498714934 | 9.770941006 |
| Negr1    | 9.944576918 | 10.04167059 | 9.719734022 | 10.04090106 | 10.09617474 | 10.25611655 |
| Neil3    | 7.43967799  | 7.238214263 | 7.424450483 | 7.426478983 | 7.644147151 | 6.985655341 |
| Neo1     | 11.17151675 | 11.27789226 | 11.25582157 | 11.32527366 | 11.26838207 | 11.28324453 |
| Nes      | 11.77699093 | 11.66397169 | 11.88611287 | 11.79216349 | 11.50310521 | 11.61493165 |
| Neto2    | 10.29882418 | 10.3366857  | 10.51538888 | 10.41834066 | 10.54044132 | 10.46075135 |
| Neu1     | 6.882295587 | 7.100748709 | 6.719919814 | 6.930224866 | 6.705814869 | 6.690058614 |
| Neurod1  | 8.268585917 | 8.103970274 | 8.454622588 | 8.131898606 | 8.011062327 | 7.860406105 |
| Neurog2  | 9.440236187 | 9.294569385 | 9.761380964 | 9.197658858 | 8.982587896 | 9.339137051 |
| Nfatc1   | 3.298059683 | 3.782574642 | 3.842769234 | 4.756726338 | 3.887381517 | 2.976330056 |
| Nfia     | 10.75901785 | 10.78646373 | 11.26399398 | 10.94727524 | 11.06341351 | 10.97786277 |
| Nfib     | 12.60537642 | 12.80986594 | 12.94820702 | 12.81533227 | 12.94073852 | 13.07525028 |
| Nfix     | 9.591498282 | 9.582147563 | 10.02983776 | 9.882521765 | 9.760860432 | 10.1960223  |
| Ngfr     | 7.484555014 | 7.100748709 | 6.632847408 | 6.917832351 | 6.696475136 | 6.710417912 |
| Nhlh2    | 8.902145364 | 8.561162936 | 8.396335926 | 8.743583998 | 8.574557633 | 8.33049125  |
| Nid1     | 9.333890723 | 9.273398729 | 9.324190943 | 9.27499792  | 9.494679304 | 9.22702349  |
| Ninj1    | 4.581385593 | 4.388824542 | 3.678570668 | 4.51488159  | 4.286420738 | 4.671251885 |
| Nipal2   | 4.716516059 | 4.295897557 | 4.246285218 | 5.305666106 | 5.072942274 | 5.159929718 |
| Nipbl    | 11.60801399 | 11.66164572 | 11.74856791 | 11.6038714  | 11.55085401 | 11.53585487 |
| Nkain3   | 9.54987429  | 9.56482602  | 9.388729668 | 9.588194975 | 9.635733667 | 9.673197903 |
| Nkx1-2   | 2.565099681 | 1.725454411 | 1.825170741 | 1           | 1.742960444 | 1           |
| Nkx2-1   | 6.975074141 | 6.515995021 | 7.876927609 | 6.598755774 | 6.787258259 | 6.917238285 |
| Nlgn2    | 9.826281694 | 9.87096959  | 10.17366039 | 9.853535404 | 9.73714379  | 10.02369556 |
| Nln      | 8.723793307 | 8.888043665 | 8.61655922  | 8.599717806 | 9.005458979 | 8.821800894 |
| Nlrp5-ps | 6.597152809 | 7.556315072 | 7.074035358 | 7.189310683 | 7.14401134  | 6.178670863 |
| Nme2     | 9.660173387 | 9.511577485 | 9.405244375 | 9.174406471 | 9.24370982  | 9.161987634 |
| Nme3     | 6.665565543 | 6.761653322 | 6.028636913 | 6.268720836 | 6.968897231 | 6.395361653 |
| Noa1     | 6.966060217 | 7.187378743 | 7.487850347 | 6.954695048 | 6.976634162 | 7.313042641 |
| Nol4l    | 9.74956208  | 9.55733836  | 9.9887877   | 9.853535404 | 9.796266608 | 9.841865315 |
| Nop58    | 9.415617687 | 9.416836482 | 9.278308334 | 9.303856758 | 9.219461434 | 9.285865894 |
| Nos1     | 6.573608143 | 7.363713503 | 7.424450483 | 7.461053316 | 7.389801017 | 7.403351065 |
| Notch1   | 11.35490862 | 11.13304514 | 11.39792915 | 11.06995047 | 10.96280604 | 10.98832196 |
| Nova1    | 10.64079559 | 10.60952058 | 10.51842838 | 10.58925292 | 10.77203567 | 10.76928875 |
| Npdc1    | 9.056615058 | 9.196754803 | 9.135162007 | 9.192523952 | 9.258065604 | 9.169360322 |
| Npm3     | 6.853257257 | 6.708561798 | 6.781940076 | 6.773989117 | 6.287574716 | 6.845414449 |
| Npm3-ps1 | 2.121272526 | 1.40785378  | 3.678570668 | 1           | 1.418787199 | 1.793876829 |
| Npnt     | 6.665565543 | 6.829533096 | 6.491514775 | 7.126078702 | 7.171236778 | 6.750294335 |
| Npr3     | 6.938675524 | 6.653441599 | 5.885308556 | 6.644599561 | 6.804748962 | 6.627197922 |
| Nr2e1    | 8.080934653 | 7.929352484 | 8.650203623 | 8.137253483 | 7.860301472 | 7.756545074 |
| Nr2f1    | 9.997513298 | 9.764446243 | 10.27238663 | 9.78695692  | 9.867698098 | 9.864752533 |
| Nr2f2    | 9.969597632 | 9.860867072 | 10.2973753  | 9.903099992 | 9.913762813 | 9.999081295 |
| Nr3c1    | 7.558381255 | 7.653156834 | 7.106715447 | 7.345517279 | 7.318533265 | 7.216701442 |
| Nr4a2    | 7.968082659 | 7.808405999 | 7.895750249 | 7.637684005 | 7.54875884  | 7.665628876 |
| Nr4a3    | 6.537554618 | 6.605842688 | 6.610232669 | 6.717910076 | 6.976634162 | 7.050974221 |
| Nrarp    | 8.737101111 | 8.460389697 | 8.516738137 | 8.289300747 | 8.19142666  | 8.242355329 |
| Nrd1     | 10.27347421 | 10.25263868 | 10.52297567 | 10.19263023 | 10.35625126 | 10.34506918 |

|             |             |             |             |             |             |             |
|-------------|-------------|-------------|-------------|-------------|-------------|-------------|
| Nrg2        | 4.265963351 | 4.476126405 | 4.123905703 | 5.267106973 | 4.557986608 | 5.273752905 |
| Nrgn        | 3.047666507 | 3.093258183 | 3.280577348 | 4.141311987 | 3.514815644 | 4.293477201 |
| Nrk         | 5.494977093 | 4.433135735 | 5.038690263 | 5.057148905 | 5.236536614 | 4.752037851 |
| Nrn1        | 8.62130425  | 8.481642877 | 8.079842927 | 8.153199881 | 8.2690846   | 8.337053056 |
| Nrp1        | 10.19560121 | 10.40571846 | 10.05098285 | 10.02942733 | 10.23166155 | 10.20501822 |
| Nrsn1       | 6.597152809 | 6.409128001 | 6.028636913 | 6.188458315 | 6.724314878 | 6.769826698 |
| Nrxn1       | 11.32657728 | 11.51956835 | 11.24209716 | 11.36518371 | 11.4471238  | 11.52727317 |
| Nsdhl       | 7.420009252 | 7.484437716 | 7.13867163  | 7.126078702 | 7.682497401 | 7.352440416 |
| Nsf         | 9.245393114 | 9.370590537 | 9.143060805 | 9.294301144 | 9.339824906 | 9.345659739 |
| Nsg1        | 11.00437982 | 11.09001535 | 10.96414721 | 10.86977725 | 10.92881197 | 11.07625289 |
| Nsg2        | 12.05213215 | 12.23099927 | 12.11719472 | 12.06787783 | 12.0751793  | 12.1732433  |
| Nsun7       | 5.726108215 | 6.364061526 | 6.93536751  | 6.036265739 | 6.157477901 | 6.5159317   |
| Nt5c3       | 8.07675356  | 8.200061614 | 8.063288183 | 8.008763986 | 8.47428784  | 8.363005837 |
| Nt5dc3      | 8.05990695  | 8.296160943 | 8.627861424 | 8.350517414 | 8.756338204 | 8.821800894 |
| Ntf3        | 2.36018646  | 2.978340632 | 1.825170741 | 2.625832949 | 2.424393538 | 4.293477201 |
| Ntm         | 8.394864328 | 8.835359626 | 8.62222139  | 8.832096146 | 8.879063027 | 9.074377625 |
| Ntn3        | 6.95698962  | 6.91794109  | 6.610232669 | 6.416976829 | 6.7695529   | 6.207605066 |
| Ntpcr       | 5.307880412 | 5.387455657 | 5.448709844 | 4.756726338 | 5.129560124 | 4.901186937 |
| Ntrk1       | 6.383592769 | 5.142596755 | 1.825170741 | 2.030760869 | 1.418787199 | 2.976330056 |
| Ntrk2       | 10.39347232 | 10.67383295 | 10.51234295 | 10.6372858  | 10.67729401 | 10.65707918 |
| Nuak1       | 9.390571786 | 9.505105441 | 9.829043681 | 9.580353341 | 9.68378914  | 9.576689791 |
| Nucb2       | 7.02800607  | 7.380782922 | 6.821853535 | 7.259740587 | 6.760618065 | 7.511727889 |
| Nucks1      | 11.63278928 | 11.48742459 | 11.58133383 | 11.59173322 | 11.57749129 | 11.60409121 |
| Nudcd2      | 7.588060991 | 7.726206233 | 7.344499199 | 7.199585062 | 7.412795491 | 7.47649919  |
| Nudt19      | 7.120274815 | 7.639038527 | 7.475391307 | 7.373012443 | 7.300152323 | 7.173357913 |
| Nuf2        | 8.381366981 | 8.076295858 | 8.293631946 | 7.867702096 | 8.109349512 | 7.665628876 |
| Nufip2      | 10.81907088 | 10.71927483 | 10.8323501  | 10.66164487 | 10.73488222 | 10.516736   |
| Nup37       | 7.019317849 | 6.829533096 | 7.057413452 | 6.363150301 | 6.429629768 | 6.291080771 |
| Nus1        | 8.781450886 | 8.71265161  | 8.846795279 | 9.017741661 | 8.984507729 | 8.894780508 |
| Nusap1      | 9.415617687 | 9.141074515 | 9.497471774 | 9.341458606 | 9.014882614 | 8.890325857 |
| Nxpe3       | 6.049947112 | 5.910600739 | 6.249587406 | 5.379823897 | 5.804480268 | 5.217963548 |
| Oat         | 8.831939429 | 8.82708087  | 8.587910159 | 8.599717806 | 8.520008774 | 8.60513838  |
| Obsl1       | 8.42477943  | 8.383436633 | 8.272183702 | 8.031948003 | 7.917693995 | 8.249329503 |
| Oc90        | 2.744494966 | 2.205919617 | 1.825170741 | 2.030760869 | 2.885350385 | 1.793876829 |
| Ocrl        | 8.909216807 | 8.870023778 | 9.049503843 | 9.000215902 | 9.075580937 | 9.062547759 |
| Olfml1      | 4.009405591 | 3.638623163 | 3.280577348 | 3.959799763 | 4.473020427 | 4.181261307 |
| Olfml3      | 5.307880412 | 5.616073469 | 4.652620793 | 5.673154141 | 5.733194373 | 5.613488471 |
| Olf1372-ps1 | 2.904029779 | 2.205919617 | 3.031034773 | 1.605542449 | 1           | 1           |
| Olf1417     | 1.476947654 | 1.40785378  | 1           | 1           | 1           | 1           |
| Olf155      | 1.476947654 | 1.725454411 | 1           | 1.605542449 | 1.742960444 | 1           |
| Olf1692     | 2.121272526 | 3.39155842  | 3.678570668 | 1           | 1.418787199 | 2.303023309 |
| Onecut2     | 10.06132855 | 9.83735925  | 9.791845706 | 9.926485008 | 9.96813712  | 9.804473349 |
| Ooep        | 5.059341058 | 4.710205239 | 4.738542537 | 5.517598924 | 5.733194373 | 4.970351389 |
| Opcml       | 7.738563721 | 8.08326439  | 7.695465596 | 8.303659976 | 8.318627347 | 8.637395189 |
| Opc         | 4.80004717  | 4.673735516 | 4.246285218 | 4.302518316 | 4.473020427 | 4.970351389 |
| Orai2       | 7.912862362 | 7.795734426 | 7.758523245 | 7.835122077 | 7.843475333 | 8.155924569 |
| Orc1        | 6.083675251 | 6.045165342 | 6.220020382 | 6.013151561 | 5.968657436 | 5.429238262 |

|          |             |             |             |             |             |             |
|----------|-------------|-------------|-------------|-------------|-------------|-------------|
| Osbp2    | 6.525333738 | 7.219360232 | 6.09529247  | 6.880003011 | 7.0370798   | 6.881773285 |
| Osbpl1a  | 8.193340801 | 8.499985994 | 8.063288183 | 8.400361505 | 8.36946657  | 8.221228213 |
| Ost4     | 7.191610894 | 7.468558218 | 7.169935286 | 6.892723325 | 6.929577683 | 6.56147301  |
| Otog     | 1.476947654 | 1           | 1.825170741 | 1.605542449 | 1.742960444 | 1.793876829 |
| Otogl    | 1.834785459 | 1.725454411 | 1           | 2.030760869 | 1.418787199 | 1.793876829 |
| Otx1     | 6.285557633 | 5.971961575 | 6.953447591 | 6.399256858 | 5.406550135 | 6.235970365 |
| Otx2     | 8.982564457 | 8.726070861 | 8.894366855 | 8.511749957 | 8.656315924 | 8.350087804 |
| P2rx3    | 5.443950196 | 4.247088592 | 3.493254909 | 3.635872179 | 3.749675008 | 3.22300096  |
| P3h1     | 6.43676005  | 6.386770728 | 6.334817815 | 6.614199465 | 6.527684741 | 6.263788702 |
| P3h4     | 5.906548925 | 6.452829242 | 5.168191412 | 5.305666106 | 5.287190159 | 5.429238262 |
| P4ha1    | 8.25013935  | 8.228626944 | 8.029597669 | 8.147903975 | 8.211236542 | 7.896393726 |
| P4hb     | 10.71194158 | 10.72039274 | 10.87209974 | 10.69652271 | 10.43698377 | 10.59273207 |
| Pabpc1   | 10.7887179  | 10.70296705 | 11.30064897 | 10.89923049 | 10.83297373 | 11.02129073 |
| Pafah1b3 | 9.55889537  | 9.486827713 | 9.709131687 | 9.320428285 | 9.341323858 | 9.244580598 |
| Pafah2   | 6.285557633 | 5.830037047 | 5.76761879  | 6.059015424 | 6.116045717 | 5.888273572 |
| Paics    | 10.47277685 | 10.37906686 | 10.46428979 | 10.25676518 | 10.17982171 | 10.09123837 |
| Pak7     | 9.0963986   | 9.34472636  | 9.166500989 | 9.032185563 | 9.216197303 | 9.244580598 |
| Palb2    | 6.410421315 | 6.168242543 | 6.278560623 | 5.786548686 | 6.129989072 | 6.317866116 |
| Palld    | 8.146234916 | 8.170919247 | 8.473539665 | 8.215279243 | 8.234009437 | 7.814121237 |
| Palm2    | 7.112126384 | 7.206652584 | 7.040597805 | 7.417704365 | 7.653830708 | 7.860406105 |
| Pank3    | 11.17836216 | 11.0518925  | 11.1032412  | 11.08041283 | 11.17311656 | 11.13485777 |
| Papd5    | 8.887897636 | 8.909766627 | 9.0283369   | 8.927902946 | 8.941669744 | 8.968477963 |
| Papola   | 10.90411881 | 10.85829947 | 11.14710471 | 10.84953046 | 10.83988303 | 10.83566598 |
| Papss2   | 5.092852815 | 5.55722848  | 5.287019574 | 4.579248421 | 4.78644219  | 4.828538958 |
| Paqr8    | 8.421485998 | 8.578528251 | 8.220861814 | 8.359709005 | 8.767531156 | 8.588735424 |
| Pard3    | 9.789709594 | 9.84147518  | 10.19661254 | 9.588194975 | 9.763098958 | 9.683533126 |
| Pard3b   | 8.089260662 | 7.761389138 | 8.402929735 | 7.607136278 | 7.724456908 | 7.814121237 |
| Pard6b   | 6.561690132 | 6.681264926 | 6.44115009  | 5.786548686 | 6.383814838 | 5.888273572 |
| Parp1    | 11.05891825 | 10.90427674 | 11.06737171 | 10.83064909 | 10.75863577 | 10.88127551 |
| Parp12   | 5.02503232  | 4.814389099 | 5.168191412 | 3.959799763 | 4.382735357 | 4.397591105 |
| Parp3    | 1           | 1.40785378  | 1.825170741 | 2.851100857 | 1.742960444 | 3.926671999 |
| Particl  | 6.423650789 | 6.708561798 | 6.491514775 | 6.990639276 | 6.589537655 | 6.317866116 |
| Patl1    | 8.301206774 | 8.141176048 | 8.402929735 | 8.12652378  | 8.339778551 | 8.310624842 |
| Patz1    | 9.668532399 | 9.539714529 | 9.671397628 | 9.422642099 | 9.482504238 | 9.485125291 |
| Pax3     | 7.274265369 | 7.030380263 | 6.159003922 | 6.760172391 | 6.687074545 | 5.991704972 |
| Pax6     | 9.147127765 | 8.933097219 | 9.299666387 | 9.026425344 | 8.811454272 | 8.985284803 |
| Pax7     | 6.910760951 | 6.452829242 | 6.189834702 | 6.814662667 | 6.129989072 | 6.583715671 |
| Pbdc1    | 7.743847311 | 7.890152881 | 7.886369626 | 7.5993972   | 7.40708114  | 6.808115555 |
| Pbrm1    | 11.69684916 | 11.70690317 | 11.78436077 | 11.64439361 | 11.70026447 | 11.70075124 |
| Pbx1     | 11.46817453 | 11.50017291 | 11.57696709 | 11.52487248 | 11.70289049 | 11.66989526 |
| Pcbp1    | 8.826969347 | 8.59080531  | 9.200962291 | 8.722363213 | 8.780849069 | 8.774239848 |
| Pcbp2    | 9.387199238 | 9.206361482 | 9.654918789 | 9.424833255 | 9.206360362 | 9.251544049 |
| Pcbp4    | 10.56595823 | 10.39665611 | 10.57936735 | 10.18230602 | 10.140758   | 10.25784669 |
| Pcdh9    | 10.81279979 | 10.90280037 | 10.8360093  | 10.84871465 | 10.83776061 | 10.91126649 |
| Pcdha10  | 6.643119837 | 6.708561798 | 6.761561469 | 6.659562717 | 6.872665379 | 6.178670863 |
| Pcdha5   | 6.195876154 | 6.364061526 | 6.189834702 | 6.659562717 | 6.312243287 | 6.899614759 |
| Pcdhac2  | 7.296009232 | 7.392051357 | 7.398289287 | 7.417704365 | 7.553939654 | 7.511727889 |

|          |             |             |             |             |             |             |
|----------|-------------|-------------|-------------|-------------|-------------|-------------|
| Pcdhb17  | 6.901334763 | 7.262975705 | 6.917057967 | 7.269527091 | 7.378164866 | 7.488337929 |
| Pcdhb22  | 6.195876154 | 6.484757804 | 6.388963369 | 6.787674775 | 6.40690416  | 6.808115555 |
| Pcdhb5   | 4.989887769 | 4.196570335 | 4.81963345  | 5.144831462 | 5.619191772 | 5.273752905 |
| Pcdhga6  | 7.528078086 | 7.590953988 | 7.895750249 | 8.088328651 | 7.813548956 | 8.015718814 |
| Pcf11    | 10.09169002 | 10.02638538 | 10.25061779 | 10.08590467 | 10.07560877 | 10.02978406 |
| Pclo     | 10.627994   | 10.9421416  | 11.05904621 | 10.91724075 | 11.03683172 | 11.05451864 |
| Pcm1     | 11.73050699 | 11.69983606 | 11.74467976 | 11.67232737 | 11.67908247 | 11.75566151 |
| Pcsk2os2 | 4.840066407 | 4.517872985 | 5.547239836 | 5.415520654 | 4.714236588 | 5.036351157 |
| Pdcd11   | 9.30379854  | 9.037246281 | 9.437717247 | 9.040782998 | 9.077381001 | 8.840394804 |
| Pddc1    | 7.679130094 | 7.576210458 | 7.662872168 | 7.189310683 | 7.204561609 | 7.066852093 |
| Pde10a   | 9.462840508 | 9.590730966 | 9.942014857 | 9.673595752 | 9.671924503 | 9.731638986 |
| Pde1c    | 8.479647215 | 8.507776492 | 8.088049603 | 8.461406184 | 8.54624179  | 8.497956714 |
| Pde4dip  | 10.802709   | 10.92769556 | 10.76740326 | 10.77848515 | 10.85779859 | 10.98100849 |
| Pde6d    | 6.92012595  | 7.53614148  | 7.344499199 | 6.598755774 | 6.63913022  | 6.845414449 |
| Pdgfra   | 8.025611828 | 8.36639877  | 8.054939026 | 8.08278871  | 8.167966003 | 8.110686546 |
| Pdia4    | 9.910917793 | 10.0299965  | 9.9887877   | 9.761175941 | 9.649109287 | 9.623068404 |
| Pdia6    | 10.34214226 | 10.54788551 | 10.70607468 | 10.30276422 | 10.11557594 | 10.22284352 |
| Pdk4     | 2.565099681 | 2.716760345 | 2.346809092 | 2.851100857 | 3.675556897 | 4.752037851 |
| Pdlim7   | 7.611372851 | 7.699244293 | 8.120417294 | 7.336234532 | 7.109240742 | 7.511727889 |
| Pdrg1    | 7.722595849 | 7.694701238 | 7.809044438 | 7.821881231 | 7.905586346 | 7.655164122 |
| Pebp1    | 9.99197321  | 10.10209962 | 9.862917238 | 9.845379193 | 9.790791349 | 9.790197672 |
| Peg10    | 10.87672375 | 10.54977339 | 10.96414721 | 10.69742926 | 10.65033781 | 10.68177761 |
| Peg12    | 7.58217369  | 7.28731932  | 7.536637639 | 7.443869719 | 7.066378704 | 7.272538694 |
| Peg3     | 11.4403757  | 11.36731766 | 11.58278648 | 11.34623398 | 11.31718702 | 11.33251191 |
| Peli1    | 9.68235735  | 9.713706391 | 9.937480185 | 9.724290616 | 9.878062561 | 9.766086408 |
| Pemt     | 3.607234804 | 4.343109123 | 3.678570668 | 2.358763209 | 2.594940123 | 2.67860439  |
| Penk     | 5.219618891 | 5.318260347 | 3.031034773 | 4.699958789 | 3.749675008 | 5.327464956 |
| Pfdn5    | 9.314491128 | 9.38052492  | 9.193375047 | 9.325128254 | 9.164635458 | 9.345659739 |
| Pfkfb2   | 9.180632088 | 9.388985996 | 9.494387746 | 9.270131487 | 9.360669825 | 9.268807034 |
| Pfkfb3   | 8.612666235 | 8.372100444 | 8.435454165 | 8.697204558 | 8.627118902 | 8.699822577 |
| Pfkip    | 9.220973577 | 9.425087857 | 9.197173657 | 9.161324684 | 9.513416404 | 9.446200997 |
| Pgam1    | 8.568682903 | 8.85788425  | 8.683081269 | 8.595833508 | 8.34576523  | 8.549720638 |
| Pgap3    | 4.87900544  | 5.495880869 | 4.561255977 | 4.302518316 | 5.014011403 | 3.926671999 |
| Pgbd1    | 6.132833551 | 6.375460809 | 6.062349611 | 5.057148905 | 5.619191772 | 5.477553384 |
| Pggt1b   | 8.089260662 | 8.00101911  | 8.356127376 | 8.110278101 | 8.070111351 | 8.263177516 |
| Pgk1     | 10.02598373 | 10.05768033 | 9.993164176 | 9.708189289 | 9.734864594 | 9.731638986 |
| Pgm2     | 7.605580105 | 7.639038527 | 7.288625645 | 7.704139468 | 7.953418955 | 7.88748063  |
| Pgm2l1   | 10.70991821 | 10.77359709 | 10.47214937 | 10.70556265 | 10.73088499 | 10.82636846 |
| Phactr1  | 8.685864841 | 8.754724657 | 8.797601428 | 8.851773261 | 8.783056817 | 9.046622181 |
| Phactr3  | 9.035227223 | 9.191927368 | 8.926757576 | 9.107778045 | 9.112918511 | 9.161987634 |
| Phactr4  | 7.889215153 | 7.812605244 | 8.264962838 | 7.575927714 | 7.701296889 | 7.957289588 |
| Phc2     | 10.03678602 | 9.900859494 | 10.11663689 | 9.879329669 | 9.613575215 | 9.691236242 |
| Phf12    | 9.280355763 | 9.105578363 | 9.348305562 | 9.088557107 | 8.995973385 | 9.042613165 |
| Phf14    | 10.85308294 | 10.92721153 | 10.8815733  | 10.90943781 | 10.90620243 | 10.89356941 |
| Phf20l1  | 10.62942202 | 10.68016673 | 10.67644663 | 10.60576416 | 10.70724761 | 10.77171271 |
| Phf24    | 7.830828485 | 8.097101279 | 7.809044438 | 8.225370976 | 8.167966003 | 8.118325412 |
| Phgdh    | 8.718435623 | 8.728295317 | 8.264962838 | 8.47838339  | 8.589771554 | 8.363005837 |

|            |             |             |             |             |             |             |
|------------|-------------|-------------|-------------|-------------|-------------|-------------|
| Phip       | 12.22076839 | 12.15366182 | 12.20187464 | 12.1164729  | 12.17711569 | 12.10375586 |
| Phlda3     | 5.059341058 | 5.270214764 | 4.246285218 | 4.141311987 | 4.983617975 | 4.059575235 |
| Phldb2     | 8.796783834 | 8.479003289 | 8.672205092 | 8.355120529 | 8.306400244 | 8.185313927 |
| Phrf1      | 9.865589518 | 9.953148676 | 9.97778807  | 9.868101382 | 9.79735917  | 9.799730468 |
| Phxr4      | 6.100248163 | 6.232338222 | 5.847135518 | 6.416976829 | 6.336497133 | 6.730493894 |
| Pi4k2b     | 6.513008451 | 7.001242867 | 6.44115009  | 6.363150301 | 6.058884313 | 5.737711018 |
| Pias2      | 10.24674069 | 10.3271777  | 10.42918971 | 10.15220563 | 10.28793514 | 10.36767829 |
| Pidd1      | 5.868356087 | 5.635166912 | 6.189834702 | 5.517598924 | 5.072942274 | 3.780271631 |
| Piezo1     | 7.045227102 | 7.127962371 | 7.023583845 | 7.136811703 | 6.548598415 | 7.018684418 |
| Piezo2     | 7.183856633 | 6.821220741 | 6.306963417 | 5.989661022 | 6.157477901 | 6.344163211 |
| Piga       | 6.762461539 | 7.079996201 | 6.698639411 | 6.326116853 | 6.116045717 | 6.178670863 |
| Pik3r2     | 9.412303249 | 9.366311913 | 9.497471774 | 9.366752857 | 9.36951198  | 9.434009897 |
| Pik3r4     | 8.60687869  | 8.510364005 | 8.644650427 | 8.580190881 | 8.54624179  | 8.432058627 |
| Pin1       | 8.388131439 | 8.624635459 | 8.683081269 | 8.110278101 | 8.198060224 | 8.178022524 |
| Pink1      | 9.234173896 | 9.182223766 | 8.931326023 | 9.142808581 | 8.945617096 | 8.903648757 |
| Pip4k2c    | 7.296009232 | 7.463225972 | 7.330732364 | 6.880003011 | 6.872665379 | 7.018684418 |
| Pira6      | 1           | 1           | 1           | 1.605542449 | 1           | 1           |
| Pirt       | 5.568285206 | 3.638623163 | 1           | 1           | 2.424393538 | 1           |
| Pisd       | 8.347060598 | 8.535987045 | 8.13633283  | 8.265046463 | 8.214511904 | 8.256270125 |
| Pisd-ps1   | 8.231453863 | 8.354927372 | 8.704590692 | 8.373387513 | 8.351727169 | 8.249329503 |
| Pisd-ps3   | 10.87190583 | 11.03626698 | 11.22824094 | 10.91022001 | 10.6701548  | 10.58586118 |
| Pitpnb     | 8.113954211 | 8.238024401 | 8.376371725 | 8.355120529 | 8.36652511  | 8.432058627 |
| Pitpnm2os1 | 4.077947413 | 4.089895615 | 4.123905703 | 2.625832949 | 3.333892988 | 2.67860439  |
| Pitx1      | 1.834785459 | 2.853470894 | 2.346809092 | 1           | 1.418787199 | 1           |
| Pkd1       | 10.80144267 | 10.87596394 | 10.84572204 | 10.66905797 | 10.81851705 | 10.88687664 |
| Pkdcc      | 7.800724456 | 7.791485714 | 7.789047758 | 7.801789279 | 7.412795491 | 7.440388676 |
| Pkdrej     | 1.476947654 | 1           | 1           | 3.635872179 | 2.424393538 | 1           |
| Pkia       | 10.91059344 | 11.04119612 | 10.76356561 | 10.88179031 | 11.13386838 | 11.14984342 |
| Pkm        | 12.67115784 | 12.5597721  | 12.764242   | 12.50690757 | 12.28834177 | 12.34218179 |
| Pla2g7     | 5.059341058 | 5.294437552 | 3.493254909 | 4.224165625 | 5.579097119 | 5.656095563 |
| Plagl1     | 10.0623862  | 9.83219777  | 10.52901651 | 10.02798668 | 10.03172027 | 10.08540428 |
| Plcl2      | 9.166930291 | 9.25808434  | 8.989435741 | 9.320428285 | 9.280116701 | 9.342402081 |
| Plcxd3     | 7.593924365 | 7.590953988 | 7.106715447 | 7.544029088 | 7.553939654 | 7.128671755 |
| Pld2       | 6.410421315 | 6.257199856 | 6.491514775 | 5.759024621 | 6.348472847 | 6.178670863 |
| Pld4       | 4.205973248 | 3.638623163 | 3.031034773 | 3.635872179 | 4.072049632 | 3.617319577 |
| Plec       | 9.489820836 | 9.442805565 | 9.219757645 | 9.461582586 | 9.280116701 | 9.415527885 |
| Plekhj1    | 7.617142431 | 7.643759998 | 7.716792521 | 7.104370141 | 7.116262226 | 7.2023978   |
| Plin4      | 6.164699178 | 6.045165342 | 6.334817815 | 5.58184729  | 5.537856244 | 5.656095563 |
| Plk1       | 7.780300359 | 7.441697696 | 7.950788095 | 7.435200555 | 7.130203499 | 7.230864661 |
| Plk3       | 6.211215576 | 6.181291514 | 5.847135518 | 6.468867128 | 6.372130108 | 6.56147301  |
| Plod2      | 7.94990973  | 7.685571983 | 7.748203182 | 7.527811331 | 7.715237468 | 7.018684418 |
| Plrg1      | 9.094331856 | 9.090094239 | 9.095006004 | 8.686286504 | 8.858273628 | 8.802964207 |
| Plxnb1     | 11.12114538 | 10.94931074 | 11.14710471 | 11.0266042  | 10.86615308 | 10.82403468 |
| Pmp22      | 4.953865662 | 5.926187346 | 4.46371154  | 5.011224712 | 5.101528924 | 6.119001134 |
| Pnck       | 8.05990695  | 7.948559978 | 7.789047758 | 7.924553886 | 8.007290269 | 8.023875973 |
| Pnizr      | 11.02188347 | 11.07129891 | 11.3094497  | 10.97146032 | 10.98742708 | 10.96944048 |
| Pnmal2     | 10.01728329 | 10.01731785 | 10.15229525 | 9.969148082 | 10.00264912 | 10.17053113 |



|          |             |             |             |             |             |             |
|----------|-------------|-------------|-------------|-------------|-------------|-------------|
| Pnn      | 9.607527545 | 9.462982302 | 9.838803268 | 9.680947854 | 9.603616704 | 9.691236242 |
| Pnpo     | 6.561690132 | 6.484757804 | 6.249587406 | 6.760172391 | 6.348472847 | 6.648457271 |
| Pogz     | 9.945723686 | 10.14435934 | 10.24144959 | 10.15880283 | 10.18567454 | 9.990782325 |
| Pold1    | 8.501647017 | 8.299156817 | 8.746670738 | 8.317877694 | 7.804883291 | 8.071873474 |
| Pole2    | 6.813607307 | 6.886415994 | 6.587257783 | 6.249069934 | 5.984092579 | 5.477553384 |
| Polg     | 8.978087873 | 8.884058651 | 9.200962291 | 8.686286504 | 8.670695801 | 8.626722855 |
| Poli     | 6.843446461 | 6.795992396 | 6.860692416 | 6.268720836 | 6.101966287 | 6.444805259 |
| Polq     | 8.672073621 | 8.576060253 | 8.757001731 | 8.444226815 | 8.485176791 | 8.33049125  |
| Polr1d   | 7.88443884  | 7.795734426 | 7.536637639 | 7.544029088 | 7.479658448 | 7.676018269 |
| Polr2a   | 10.50736133 | 10.45892874 | 10.66689048 | 10.53043726 | 10.39718216 | 10.44108885 |
| Polr2c   | 7.850554425 | 8.117610921 | 8.112393197 | 7.841697207 | 7.969017113 | 7.50008031  |
| Polr2l   | 6.70943572  | 6.484757804 | 6.306963417 | 6.125188133 | 6.440859724 | 6.845414449 |
| Pomc     | 4.716516059 | 4.745775733 | 4.46371154  | 4.640865717 | 3.820170665 | 2.976330056 |
| Pomgnt1  | 8.434614855 | 8.6877207   | 8.416027626 | 8.265046463 | 8.627118902 | 8.610564849 |
| Postn    | 7.222217761 | 7.1076004   | 6.879726671 | 7.269527091 | 7.237134017 | 6.917238285 |
| Pou2f1   | 9.943429237 | 9.88499531  | 10.11462979 | 10.09418876 | 9.953509838 | 9.775779323 |
| Pou3f2   | 10.71866571 | 10.48349928 | 10.60961075 | 10.67275029 | 10.59423718 | 10.68306589 |
| Pou3f3   | 10.51665133 | 10.45892874 | 10.70873821 | 10.38721616 | 10.31030333 | 10.54818212 |
| Pou4f1   | 7.908163826 | 7.643759998 | 7.76877001  | 7.674980951 | 7.102184918 | 7.440388676 |
| Pou6f1   | 9.631954958 | 9.704696984 | 9.717090734 | 9.727844416 | 9.646686561 | 9.952834611 |
| Ppdpf    | 8.510973767 | 8.750353253 | 8.473539665 | 8.345899565 | 7.953418955 | 8.343585151 |
| Ppfia1   | 9.640478591 | 9.547293977 | 9.732878302 | 9.594048355 | 9.657556928 | 9.731638986 |
| Ppfia2   | 9.88843167  | 10.07088739 | 9.874824743 | 9.918732044 | 10.08189907 | 10.17420042 |
| Ppie     | 7.373045073 | 7.174384962 | 7.074035358 | 7.093392124 | 6.796030117 | 6.769826698 |
| Ppig     | 9.527071674 | 9.330154454 | 9.646608243 | 9.450870792 | 9.457841459 | 9.473260051 |
| Ppm1g    | 9.083953492 | 9.108996827 | 9.263891923 | 9.105047826 | 9.016759976 | 9.147128257 |
| Ppp1cb   | 10.91411285 | 10.89687971 | 10.99829424 | 10.95335963 | 11.02101849 | 10.86092946 |
| Ppp1r13b | 8.003755861 | 7.902025    | 7.86742339  | 7.828516844 | 8.275371286 | 8.242355329 |
| Ppp1r14c | 7.08740126  | 7.323081463 | 7.023583845 | 7.583793375 | 7.26898723  | 7.568595648 |
| Ppp1r16b | 7.112126384 | 7.134686327 | 6.860692416 | 7.535942998 | 7.28153417  | 7.403351065 |
| Ppp1r1b  | 4.627849702 | 4.476126405 | 3.493254909 | 3.370835508 | 3.234144523 | 3.780271631 |
| Ppp1r1c  | 5.02503232  | 4.144218708 | 1           | 3.217496026 | 2.424393538 | 1.793876829 |
| Ppp1r2   | 9.145132481 | 8.929234894 | 8.967361967 | 8.733012623 | 8.901590584 | 8.774239848 |
| Ppp2r1a  | 11.16857302 | 11.16828958 | 11.13824048 | 11.10658279 | 11.03359019 | 11.07232549 |
| Ppp2r1b  | 8.930225521 | 8.940790987 | 8.875526039 | 8.896668974 | 9.016759976 | 8.985284803 |
| Ppp2r2a  | 8.710361605 | 8.797725286 | 8.976232046 | 8.66419935  | 8.97681302  | 8.788673515 |
| Ppp2r2b  | 9.671308008 | 9.975793551 | 9.886634772 | 9.702781997 | 9.896532999 | 10.10668156 |
| Ppp2r2c  | 8.391501811 | 8.655354339 | 8.402929735 | 8.890340207 | 8.815773921 | 8.908062522 |
| Ppp2r5b  | 9.30021666  | 9.195147452 | 8.83708979  | 8.979496412 | 8.632026291 | 8.981101413 |
| Ppp2r5e  | 9.893194804 | 9.637639854 | 9.833931727 | 9.673595752 | 9.914769952 | 9.820951708 |
| Ppp3ca   | 10.4357114  | 10.56727551 | 10.53952749 | 10.53043726 | 10.64123932 | 10.732432   |
| Ppp3cb   | 10.16145996 | 9.936890746 | 10.16010105 | 9.920285973 | 10.33684555 | 9.988700102 |
| Ppp3r1   | 9.528603113 | 9.624562838 | 9.761380964 | 9.713576389 | 9.716500235 | 9.809200689 |
| Prc1     | 9.80874191  | 9.561087048 | 9.816750616 | 9.398317146 | 9.459222731 | 9.458289942 |
| Prdm12   | 5.788796395 | 5.862804336 | 4.81963345  | 5.101656215 | 4.516128927 | 4.828538958 |
| Prdm2    | 10.1355644  | 10.0209517  | 10.31845498 | 10.21559305 | 10.17141912 | 10.00938832 |
| Prdx4    | 7.825854568 | 7.615196579 | 7.662872168 | 7.552070109 | 7.710605559 | 7.2023978   |

|          |             |             |             |             |             |             |
|----------|-------------|-------------|-------------|-------------|-------------|-------------|
| Prdx5    | 8.042861293 | 8.103970274 | 7.424450483 | 7.767668091 | 7.901527776 | 7.948745976 |
| Prepl    | 9.332137864 | 9.297568562 | 9.303195523 | 9.542512203 | 9.44395552  | 9.485125291 |
| Prickle1 | 6.356255846 | 6.795992396 | 6.761561469 | 7.189310683 | 6.86434863  | 6.985655341 |
| Prickle2 | 8.652541711 | 8.936949232 | 8.633479495 | 8.946323819 | 8.854079556 | 9.038592978 |
| Prkaa2   | 8.624172134 | 8.624635459 | 8.498382661 | 8.486797657 | 8.862455543 | 8.840394804 |
| Prkar1b  | 8.89266253  | 9.049751753 | 8.922174616 | 9.043637462 | 8.96713656  | 9.090001383 |
| Prkca    | 8.734449353 | 8.638894724 | 8.570443605 | 8.67159937  | 8.747320896 | 8.968477963 |
| Prkcb    | 9.530132927 | 9.553579907 | 9.475743831 | 9.641924457 | 9.704902657 | 9.887282326 |
| Prkce    | 8.739748004 | 9.187083725 | 9.107170597 | 8.937142783 | 9.238892638 | 9.251544049 |
| Prkcz    | 8.520240608 | 8.855851027 | 8.498382661 | 8.71879587  | 8.427070391 | 8.94719028  |
| Prkg1    | 7.128377482 | 7.262975705 | 6.540180369 | 7.178962608 | 7.066378704 | 6.605620608 |
| Prnp     | 9.10873727  | 9.226959068 | 9.166500989 | 9.099571837 | 9.184814066 | 9.135882415 |
| Prokr1   | 5.829124602 | 5.270214764 | 5.683462387 | 5.379823897 | 4.855205563 | 4.293477201 |
| Prom1    | 9.393936469 | 9.108996827 | 9.150916591 | 9.080240518 | 9.011120543 | 8.916849748 |
| Proser1  | 7.386620135 | 7.699244293 | 7.706168466 | 7.753790403 | 7.485092966 | 7.736830824 |
| Proser3  | 6.195876154 | 6.114833364 | 7.090467934 | 5.730965216 | 6.04423294  | 5.477553384 |
| Prpf31   | 9.256525758 | 9.379109904 | 9.327660665 | 9.014835446 | 9.013002805 | 8.863305178 |
| Prpf38b  | 8.612666235 | 8.855851027 | 9.135162007 | 8.880794695 | 8.594807415 | 8.626722855 |
| Prpf40a  | 10.47754202 | 10.55730032 | 10.54996245 | 10.42820402 | 10.48930174 | 10.39309073 |
| Prph     | 7.552371328 | 6.5465702   | 3.031034773 | 4.699958789 | 4.78644219  | 4.901186937 |
| Prr36    | 8.064137081 | 7.997334635 | 8.926757576 | 8.552401406 | 8.227539493 | 8.894780508 |
| Prrc2a   | 11.59674303 | 11.57190892 | 11.93811176 | 11.70379647 | 11.3816159  | 11.73655565 |
| Prrc2c   | 12.1466625  | 12.09432031 | 12.49744468 | 12.30015505 | 12.20393518 | 12.23075453 |
| Prrt3    | 5.943756695 | 5.387455657 | 5.104893407 | 5.101656215 | 5.383455101 | 6.263788702 |
| Prrx2    | 2.36018646  | 2.56572585  | 3.842769234 | 2.358763209 | 2.594940123 | 3.433590479 |
| Prrxl1   | 3.781766418 | 3.478699897 | 2.72911076  | 3.045898796 | 2.007489679 | 2.303023309 |
| Prss12   | 5.4177436   | 6.087368536 | 5.396800833 | 5.415520654 | 5.236536614 | 4.901186937 |
| Prss23   | 6.383592769 | 6.625071112 | 5.168191412 | 6.103466066 | 5.558624041 | 5.776850189 |
| Prss35   | 4.265963351 | 4.247088592 | 3.280577348 | 2.358763209 | 3.820170665 | 5.273752905 |
| Psap     | 11.07891542 | 11.12209023 | 11.05277042 | 10.98785546 | 10.98981845 | 11.01618876 |
| Psd      | 9.436977892 | 9.55733836  | 9.378729333 | 9.407210109 | 9.427114024 | 9.374652299 |
| Psd2     | 9.54987429  | 9.816601598 | 9.816750616 | 9.755963996 | 9.726858936 | 9.691236242 |
| Psip1    | 11.66587077 | 11.66164572 | 11.8174373  | 11.72440088 | 11.61824837 | 11.6744364  |
| Psma4    | 9.597347732 | 9.537179172 | 9.500549225 | 9.341458606 | 9.315627411 | 9.326002533 |
| Psemb2   | 9.10873727  | 9.247266713 | 9.306716046 | 9.032185563 | 8.879063027 | 8.826471886 |
| Psemb3   | 8.755528188 | 8.874047693 | 8.688488764 | 8.704437625 | 8.754089156 | 8.270051993 |
| Psemb4   | 9.661569923 | 9.693355526 | 9.289026884 | 9.265248583 | 9.410073603 | 9.202078955 |
| Psemb6   | 9.9852969   | 10.09694425 | 10.15229525 | 9.906239982 | 9.783090909 | 9.766086408 |
| Psm�2    | 11.0126111  | 10.86892408 | 10.8803925  | 10.87459448 | 10.85779859 | 10.6478721  |
| Psm�4    | 9.611868428 | 9.717070466 | 9.69576825  | 9.418249777 | 9.410073603 | 9.296005222 |
| Psmg2    | 6.87268094  | 6.971504846 | 6.632847408 | 6.535272723 | 6.452002941 | 6.583715671 |
| Psmg4    | 6.513008451 | 6.644046623 | 6.516052763 | 6.013151561 | 6.101966287 | 5.327464956 |
| Ptbp2    | 11.71713793 | 11.74667494 | 11.76785302 | 11.74164225 | 11.7611664  | 11.7346932  |
| Ptdss1   | 8.801858816 | 8.726070861 | 8.772360819 | 8.686286504 | 8.839303535 | 8.725057258 |
| Pten     | 10.81719242 | 10.67267836 | 10.7725043  | 10.64951674 | 10.8351032  | 10.81348573 |
| Ptgds    | 5.519829329 | 6.219744874 | 5.287019574 | 5.989661022 | 5.516785121 | 6.444805259 |
| Pth1r    | 5.980028937 | 5.474837936 | 5.726154136 | 5.989661022 | 5.262085683 | 4.901186937 |

|          |             |             |             |             |             |             |
|----------|-------------|-------------|-------------|-------------|-------------|-------------|
| Ptk2b    | 2.36018646  | 1.985596612 | 2.346809092 | 2.358763209 | 2.747440291 | 3.22300096  |
| Ptov1    | 10.70924313 | 10.6215378  | 10.63363747 | 10.53652923 | 10.36732926 | 10.4196098  |
| Ptpn14   | 7.079064482 | 7.206652584 | 7.023583845 | 6.85422089  | 6.99198465  | 7.258780673 |
| Ptpn23   | 8.381366981 | 8.629404224 | 8.772360819 | 8.754078474 | 8.392784817 | 8.515418536 |
| Ptpn3    | 6.164699178 | 5.910600739 | 5.396800833 | 6.30723743  | 5.495401678 | 4.901186937 |
| Ptpn4    | 9.82877006  | 9.808214183 | 9.877194496 | 9.754222488 | 9.887327339 | 9.830284093 |
| Ptprj    | 7.879646662 | 8.497379785 | 8.473539665 | 8.439899818 | 8.34576523  | 8.63206889  |
| Ptprm    | 8.308356766 | 8.380610926 | 8.19829524  | 8.552401406 | 8.504036907 | 8.382168562 |
| Ptprt    | 9.380430398 | 9.695630961 | 9.472612952 | 9.778414348 | 9.894492367 | 10.06578516 |
| Ptprv    | 1.476947654 | 2.205919617 | 1.825170741 | 2.358763209 | 2.594940123 | 1           |
| Ptprz1   | 11.61703978 | 11.69330359 | 11.91234657 | 11.64486363 | 11.79793045 | 11.83834941 |
| Pum2     | 11.64977672 | 11.49724097 | 11.76145325 | 11.55769205 | 11.61732069 | 11.54792554 |
| Pwp2     | 8.257546304 | 7.933214495 | 7.640726807 | 7.815214956 | 7.8561133   | 7.736830824 |
| Pxdn     | 10.59767435 | 10.66108135 | 10.58662587 | 10.46273753 | 10.53390135 | 10.54959533 |
| Pycl     | 7.820863442 | 7.787224452 | 7.536637639 | 7.279247656 | 7.354607166 | 7.452526219 |
| Pygb     | 9.967340869 | 9.991621302 | 10.03833302 | 9.938803736 | 9.878062561 | 10.02572792 |
| Qk       | 12.0899648  | 11.89661745 | 12.10562007 | 11.94463678 | 12.06523582 | 12.01651435 |
| Qser1    | 10.82032184 | 10.85117267 | 11.21237463 | 10.91100178 | 10.94369052 | 10.86887594 |
| R3hdm1   | 9.739017485 | 9.94933973  | 9.966703932 | 9.951018169 | 9.901621987 | 10.07366486 |
| Rab1     | 10.16441822 | 10.21506353 | 10.33406504 | 10.04802607 | 10.19730945 | 10.0378623  |
| Rab15    | 7.50958588  | 7.662492862 | 7.437355307 | 7.788237489 | 7.429803982 | 7.034919655 |
| Rab18    | 8.955494197 | 8.874047693 | 8.81748071  | 9.220542415 | 9.248510971 | 9.018322268 |
| Rab2b    | 8.367742165 | 8.322902449 | 8.152074704 | 8.495163134 | 8.147548678 | 8.276893869 |
| Rab32    | 4.378941788 | 4.089895615 | 5.168191412 | 3.635872179 | 3.597423784 | 2.976330056 |
| Rab34    | 7.359341061 | 7.489692277 | 7.245252952 | 7.535942998 | 7.184659224 | 6.845414449 |
| Rab3c    | 11.43344368 | 11.49560954 | 11.41107231 | 11.44507905 | 11.55085401 | 11.63437471 |
| Rab8b    | 9.49139231  | 9.324284229 | 9.49129711  | 9.503651715 | 9.453689693 | 9.412424399 |
| Rabep1   | 10.47357214 | 10.49203379 | 10.45797115 | 10.47653402 | 10.42925178 | 10.39309073 |
| Rabgap1l | 10.04857585 | 10.14352617 | 10.15229525 | 10.10652639 | 10.35921372 | 10.42115467 |
| Rac2     | 2.904029779 | 3.782574642 | 2.346809092 | 2.030760869 | 2.007489679 | 1           |
| Rac3     | 8.25013935  | 8.287135812 | 8.235712449 | 8.020402565 | 8.095204259 | 8.015718814 |
| Racgap1  | 9.935369804 | 9.742604363 | 9.966703932 | 9.731389483 | 9.644259761 | 9.606869186 |
| Rad21    | 10.80080909 | 10.72819394 | 10.95744372 | 10.82982253 | 10.91780268 | 10.75955198 |
| Rad51ap1 | 7.136434895 | 6.787483949 | 7.006366839 | 6.229147667 | 6.687074545 | 6.899614759 |
| Rad54l2  | 10.04536999 | 9.800834981 | 10.15033719 | 9.990015651 | 9.947617146 | 10.21573981 |
| Rag1     | 2.121272526 | 1.985596612 | 1           | 2.358763209 | 2.424393538 | 4.293477201 |
| Rai1     | 9.882455554 | 9.662280629 | 10.05098285 | 9.876130494 | 9.504078273 | 9.89174637  |
| Rai14    | 9.621946651 | 9.63645592  | 9.745903906 | 9.666205991 | 9.487928067 | 9.458289942 |
| Rai2     | 6.449751263 | 5.878913056 | 6.127499866 | 6.125188133 | 6.23693491  | 4.970351389 |
| Rala     | 10.08857865 | 10.04435125 | 10.00621451 | 9.969148082 | 9.959378559 | 10.09511469 |
| Raly     | 10.34301289 | 10.3826019  | 10.31496302 | 10.13223108 | 10.05474539 | 10.10283623 |
| Ralyl    | 8.008153623 | 7.909885815 | 7.716792521 | 8.260146288 | 7.972890444 | 8.242355329 |
| Ramp3    | 1.476947654 | 3.478699897 | 1.825170741 | 3.635872179 | 3.234144523 | 2.303023309 |
| Ranbp1   | 9.962816723 | 9.991621302 | 10.1832682  | 10.00033733 | 9.707229643 | 9.763652969 |
| Rap1gds1 | 8.911566274 | 8.905841249 | 8.772360819 | 8.418067996 | 9.026110319 | 8.769396357 |
| Rap2b    | 7.743847311 | 7.902025    | 8.10432422  | 7.985201309 | 8.140678183 | 8.221228213 |
| Rap2c    | 8.834418064 | 8.622245153 | 8.861232178 | 8.678961627 | 8.832924332 | 8.835768745 |

|         |             |             |             |             |             |             |
|---------|-------------|-------------|-------------|-------------|-------------|-------------|
| Rapgef4 | 7.229769085 | 7.735082723 | 7.475391307 | 7.591616383 | 8.04825021  | 7.814121237 |
| Rapgef5 | 8.801858816 | 8.894000621 | 8.83221245  | 8.902970099 | 9.001672222 | 9.018322268 |
| Rapgef1 | 6.383592769 | 6.244822593 | 5.726154136 | 6.416976829 | 6.463060749 | 6.899614759 |
| Rarb    | 7.37984857  | 7.187378743 | 7.230500702 | 7.298494479 | 7.54875884  | 7.851267163 |
| Rassf1  | 7.120274815 | 6.925715892 | 6.761561469 | 6.827969626 | 6.847569902 | 7.018684418 |
| Rassf10 | 4.75888608  | 4.847509657 | 4.123905703 | 3.959799763 | 4.235739691 | 4.494694577 |
| Raver1  | 6.410421315 | 6.257199856 | 6.988941883 | 6.614199465 | 6.312243287 | 6.207605066 |
| Rbbp6   | 10.41018436 | 10.28699817 | 10.69402757 | 10.48285739 | 10.41935074 | 10.51529022 |
| Rbbp8   | 8.394864328 | 8.203263614 | 8.435454165 | 7.949119629 | 8.011062327 | 7.488337929 |
| Rbfox1  | 9.263900079 | 9.685363119 | 9.598588894 | 9.530353177 | 9.596102449 | 9.804473349 |
| Rbl1    | 8.971346845 | 8.59080531  | 8.971803824 | 8.788518765 | 8.735969419 | 8.480280949 |
| Rbm10   | 9.623380667 | 9.591953008 | 9.794355633 | 9.50157714  | 9.338324395 | 9.173032585 |
| Rbm25   | 10.62656457 | 10.66398935 | 10.89917028 | 10.66442925 | 10.64549242 | 10.76321098 |
| Rbm27   | 9.729727316 | 9.49076391  | 9.781762102 | 9.572468852 | 9.709552882 | 9.693794835 |
| Rbm6    | 10.61939607 | 10.77413549 | 10.67372276 | 10.66628252 | 10.64549242 | 10.58586118 |
| Rbms1   | 7.800724456 | 7.804194496 | 7.106715447 | 7.391055685 | 7.54875884  | 7.158615784 |
| Rbmx    | 11.21734261 | 11.24758373 | 11.32689172 | 11.15885722 | 11.1898535  | 11.25926134 |
| Rc3h2   | 11.4621767  | 11.38540229 | 11.33553428 | 11.40790142 | 11.50544699 | 11.40065703 |
| Rcan2   | 8.669299485 | 8.671628284 | 8.409493545 | 8.781696166 | 8.687293155 | 8.890325857 |
| Rcan3   | 8.723793307 | 8.627021812 | 8.593685665 | 8.700825624 | 8.612295778 | 8.858752117 |
| Rcc1    | 8.10986786  | 7.921597309 | 7.758523245 | 7.575927714 | 7.589693592 | 7.440388676 |
| Rcn1    | 8.758141518 | 8.776385174 | 8.6667361   | 8.5199724   | 8.418575082 | 8.41355144  |
| Rcn2    | 9.789709594 | 9.74150354  | 9.843658414 | 9.769820892 | 9.65152795  | 9.678374769 |
| Rcn3    | 7.795645475 | 7.878182253 | 7.789047758 | 7.614834063 | 7.287766956 | 7.62330656  |
| Rdh14   | 6.853257257 | 6.735351769 | 6.44115009  | 7.025709693 | 6.548598415 | 6.881773285 |
| Rdx     | 11.17933744 | 11.05100416 | 11.0818267  | 11.00699434 | 10.94467699 | 10.88351857 |
| Reep1   | 10.75051234 | 10.84964091 | 10.65035978 | 10.67551334 | 10.81636294 | 10.77654844 |
| Reep3   | 9.578249657 | 9.305039341 | 9.635452519 | 9.34609067  | 9.491982599 | 9.47027843  |
| Rel2    | 5.660571873 | 5.941607358 | 5.922497536 | 5.550080729 | 5.968657436 | 6.291080771 |
| Reln    | 11.8924049  | 12.05099065 | 12.06669925 | 11.95149241 | 11.97396916 | 12.00316719 |
| Reps2   | 7.634314007 | 8.349157286 | 7.876927609 | 8.060413729 | 8.306400244 | 8.303941444 |
| Rer1    | 8.801858816 | 8.85788425  | 8.797601428 | 8.909243823 | 8.692000395 | 8.858752117 |
| Rere    | 10.52588189 | 10.54788551 | 10.98407279 | 10.63444848 | 10.60675539 | 10.86206736 |
| Rest    | 8.329596556 | 8.311078487 | 8.257705651 | 7.930734648 | 8.08807928  | 8.095286392 |
| Ret     | 6.356255846 | 5.364757319 | 5.396800833 | 5.517598924 | 5.406550135 | 5.613488471 |
| Rev1    | 8.82447787  | 8.629404224 | 8.782510115 | 8.940209624 | 8.712994952 | 8.774239848 |
| Rev3l   | 11.82264812 | 11.84809197 | 11.73098811 | 11.84466248 | 11.89986646 | 11.9274654  |
| Rfc1    | 9.29842238  | 9.273398729 | 9.382070486 | 9.07187571  | 9.077381001 | 9.090001383 |
| Rfc2    | 8.849201108 | 8.619850879 | 8.736265233 | 8.490986459 | 8.324702257 | 8.41974692  |
| Rfx2    | 5.494977093 | 5.195006214 | 6.159003922 | 4.863970092 | 4.638225882 | 5.379248858 |
| Rgag4   | 8.955494197 | 8.925362201 | 8.980646719 | 9.046486289 | 8.754089156 | 8.835768745 |
| Rgs10   | 5.980028937 | 5.910600739 | 5.104893407 | 5.96578166  | 5.714808604 | 6.088214528 |
| Rgs17   | 8.223911375 | 8.222327792 | 7.809044438 | 8.260146288 | 8.490590601 | 8.704904948 |
| Rgs4    | 7.426595337 | 7.546263538 | 7.344499199 | 7.725628009 | 7.648997054 | 7.665628876 |
| Rgs7bp  | 6.597152809 | 6.653441599 | 5.726154136 | 6.502451963 | 6.474034446 | 6.934649122 |
| Rgs9    | 7.599764006 | 7.703773087 | 7.215596043 | 7.746801175 | 7.976753403 | 7.842069961 |
| Rhbd13  | 8.849201108 | 8.810379461 | 9.150916591 | 8.626618954 | 8.649071877 | 8.263177516 |

|        |             |             |             |             |             |             |
|--------|-------------|-------------|-------------|-------------|-------------|-------------|
| Rhcg   | 4.077947413 | 4.196570335 | 4.359090506 | 3.217496026 | 3.675556897 | 3.22300096  |
| Rian   | 12.02282038 | 12.04497993 | 11.95222939 | 11.91142479 | 11.9969762  | 11.9485084  |
| Ric1   | 9.685106514 | 9.624562838 | 9.690388022 | 9.686437447 | 9.65152795  | 9.696348898 |
| Ric3   | 9.002538945 | 8.993528261 | 8.797601428 | 8.851773261 | 8.891394372 | 8.921223372 |
| Rif1   | 10.91352688 | 10.73705824 | 10.80149034 | 10.61730642 | 10.82442431 | 10.62392338 |
| Rimklb | 10.65208019 | 10.69104182 | 10.72461695 | 10.63823033 | 10.66417834 | 10.62660406 |
| Rims1  | 8.42477943  | 8.673938219 | 8.435454165 | 8.507621095 | 8.802775977 | 8.916849748 |
| Rims2  | 10.38335137 | 10.38964612 | 10.45321394 | 10.38271448 | 10.40149952 | 10.19421636 |
| Rims3  | 6.226393616 | 5.672612041 | 5.683462387 | 6.036265739 | 6.143798956 | 5.888273572 |
| Rims4  | 5.46968923  | 5.195006214 | 4.123905703 | 4.699958789 | 5.3361254   | 5.036351157 |
| Ripk2  | 5.519829329 | 5.813370024 | 5.847135518 | 5.484368924 | 5.3361254   | 4.494694577 |
| Ripk4  | 1.476947654 | 1.40785378  | 1.825170741 | 1           | 3.234144523 | 1           |
| Rita1  | 5.591916194 | 6.114833364 | 5.726154136 | 5.702349231 | 5.579097119 | 5.379248858 |
| Rlim   | 10.88750559 | 10.74312101 | 10.92459704 | 10.77247541 | 10.86927358 | 10.83913716 |
| Rmi2   | 5.997828709 | 5.709109819 | 5.594091143 | 5.813557456 | 5.473696519 | 5.613488471 |
| Rmrp   | 14.55818687 | 14.86096575 | 14.98232398 | 14.48063681 | 14.45550575 | 14.36141118 |
| Rnd3   | 11.15177751 | 11.03132095 | 10.84693154 | 10.93272115 | 10.89041825 | 10.87790436 |
| Rnf11  | 9.337390066 | 9.418214993 | 9.234619592 | 9.357606177 | 9.389935336 | 9.517260325 |
| Rnf112 | 7.706449263 | 7.993640727 | 7.789047758 | 7.91211235  | 7.995914555 | 7.957289588 |
| Rnf114 | 9.33913656  | 9.346175488 | 9.530967976 | 9.174406471 | 9.013002805 | 9.135882415 |
| Rnf130 | 10.90529818 | 10.99066688 | 10.82254661 | 10.82816798 | 10.96426602 | 11.1244641  |
| Rnf138 | 8.571657212 | 8.380610926 | 8.492211903 | 8.409241915 | 8.609810382 | 8.555359192 |
| Rnf14  | 10.05390318 | 10.12928805 | 9.719734022 | 10.10105602 | 10.00643332 | 9.974039779 |
| Rnf152 | 9.162991471 | 9.408537643 | 9.123232128 | 9.431386827 | 9.714188166 | 9.714101844 |
| Rnf165 | 8.973597356 | 8.793482441 | 9.365286802 | 9.140143917 | 8.951517946 | 9.296005222 |
| Rnf167 | 8.532504525 | 8.510364005 | 8.369655123 | 8.279647909 | 8.051916815 | 8.03198727  |
| Rnf187 | 10.69294555 | 10.85066227 | 10.78138795 | 10.56958286 | 10.49806388 | 10.67142976 |
| Rnf19b | 8.696803675 | 8.553656191 | 8.661246298 | 8.431206693 | 8.091646168 | 8.323899464 |
| Rnf2   | 10.0464394  | 10.01367481 | 10.04256197 | 9.944923879 | 10.12691884 | 9.988700102 |
| Rnf24  | 9.041676932 | 8.849734109 | 8.797601428 | 9.037922875 | 9.152732935 | 8.972698064 |
| Rnf31  | 8.008153623 | 7.882183508 | 7.809044438 | 7.544029088 | 7.29397293  | 7.579705073 |
| Rnf32  | 5.868356087 | 6.397992672 | 6.249587406 | 6.659562717 | 6.569213246 | 6.468905804 |
| Rnf38  | 10.9356282  | 10.85677526 | 11.06008953 | 10.91879629 | 10.93030675 | 10.93525085 |
| Rnf43  | 4.143380003 | 3.56087634  | 3.678570668 | 3.752118759 | 2.424393538 | 3.617319577 |
| Rnpep  | 8.384753175 | 8.354927372 | 8.44826137  | 8.418067996 | 7.992102629 | 8.103007018 |
| Rnu12  | 6.803522181 | 6.933449019 | 7.914330472 | 7.486450945 | 7.0370798   | 7.390790838 |
| Robo1  | 11.59308837 | 11.59647093 | 11.6762454  | 11.5799837  | 11.59958038 | 11.74521545 |
| Robo2  | 11.17543239 | 11.32862227 | 11.35351687 | 11.29024956 | 11.38598003 | 11.45294649 |
| Robo3  | 8.457306733 | 7.944738882 | 7.437355307 | 7.930734648 | 7.639280888 | 7.814121237 |
| Rock2  | 10.32901922 | 10.30051606 | 10.29027974 | 10.44880784 | 10.41722022 | 10.29707767 |
| Rora   | 8.786579996 | 8.993528261 | 8.802596988 | 9.110503108 | 9.130364297 | 9.058582815 |
| Rorb   | 8.021267043 | 7.997334635 | 8.159881693 | 8.163733725 | 8.34874928  | 8.41355144  |
| Rpa1   | 9.323341477 | 9.28855226  | 9.278308334 | 8.890340207 | 9.04094595  | 8.831127804 |
| Rpa2   | 8.189473526 | 7.866111468 | 8.286517902 | 7.682326016 | 7.312432268 | 7.158615784 |
| Rpgr   | 9.073499928 | 9.206361482 | 9.036840981 | 9.124051742 | 9.240500153 | 9.361838593 |
| Rpl10  | 10.87009496 | 10.91798388 | 10.76100149 | 10.66164487 | 10.66537562 | 10.62392338 |
| Rpl10a | 10.28710992 | 10.2284836  | 10.42757378 | 10.19263023 | 9.982617585 | 10.18696992 |

|         |             |             |             |             |             |             |
|---------|-------------|-------------|-------------|-------------|-------------|-------------|
| Rpl12   | 10.56893815 | 10.64114994 | 10.45162471 | 10.33224609 | 10.37320292 | 10.24045126 |
| Rpl13   | 10.41681535 | 10.40710763 | 10.29383188 | 10.02654458 | 10.09528663 | 10.10283623 |
| Rpl13a  | 11.84094545 | 11.88445124 | 11.77358864 | 11.63779717 | 11.64276912 | 11.47839728 |
| Rpl18   | 10.62656457 | 10.67844209 | 10.62661223 | 10.44988414 | 10.38995772 | 10.36447003 |
| Rpl19   | 9.919114598 | 10.34177956 | 9.879560362 | 9.769820892 | 9.728005325 | 9.731638986 |
| Rpl24   | 10.61219177 | 10.75571598 | 10.53202747 | 10.40730169 | 10.57907053 | 10.40563104 |
| Rpl27   | 9.469234364 | 9.55733836  | 9.223487509 | 9.069076627 | 8.995973385 | 8.960000545 |
| Rpl27a  | 10.56521228 | 10.65583213 | 10.47058088 | 10.53754206 | 10.34658103 | 10.49782683 |
| Rpl3    | 10.98219731 | 11.18660557 | 10.91655521 | 10.92190234 | 11.04697221 | 10.7957309  |
| Rpl35a  | 8.680364163 | 9.096996597 | 8.79258851  | 9.014835446 | 8.767531156 | 8.985284803 |
| Rpl36   | 9.120971308 | 9.516734297 | 9.395358253 | 8.95241221  | 9.162941098 | 8.407329241 |
| Rpl36a  | 9.675461434 | 9.607746071 | 9.621385452 | 9.558566454 | 9.357710355 | 9.296005222 |
| Rpl37   | 9.942280642 | 9.989768201 | 9.923790017 | 9.840463241 | 9.842515306 | 9.792586783 |
| Rpl37a  | 10.05602862 | 10.11320679 | 9.948790251 | 9.81395812  | 9.817962183 | 9.818609149 |
| Rpl38   | 9.531661121 | 9.55608663  | 9.285462875 | 9.429205609 | 9.482504238 | 9.348910057 |
| Rpl39   | 9.884848972 | 9.799777721 | 9.334575175 | 9.558566454 | 9.736004642 | 9.584983343 |
| Rpl41   | 11.03702688 | 11.0549974  | 11.17144561 | 10.87619666 | 10.76479284 | 10.75710749 |
| Rpl5    | 11.1759211  | 11.23120728 | 11.05381828 | 11.14828758 | 11.06568228 | 10.94387452 |
| Rpl6    | 10.81593875 | 10.74806258 | 10.64619734 | 10.623997   | 10.62533137 | 10.4303893  |
| Rpl7    | 11.96828433 | 12.06227635 | 11.84614804 | 11.84507159 | 11.87343178 | 11.78295321 |
| Rpl7a   | 9.517848748 | 9.739299371 | 9.809324181 | 9.384874065 | 9.132097329 | 9.374652299 |
| Rpl8    | 11.57911562 | 11.56663518 | 11.53780911 | 11.309944   | 11.26522689 | 11.27387006 |
| Rplp0   | 12.43108075 | 12.40290435 | 12.27018512 | 12.1752457  | 12.21521996 | 12.13468693 |
| Rplp1   | 11.12266718 | 11.17033621 | 11.12034692 | 10.93272115 | 10.83988303 | 10.88127551 |
| Rpn1    | 9.945723686 | 9.993472025 | 9.900680363 | 9.869710783 | 9.674305249 | 9.862480081 |
| Rpn2    | 10.17619097 | 10.18865096 | 10.39321431 | 9.998867317 | 10.00926497 | 10.09123837 |
| Rpph1   | 14.83392275 | 14.95961612 | 14.79151841 | 14.87655889 | 14.62773121 | 14.91679068 |
| Rprd2   | 9.54987429  | 9.514158195 | 9.829043681 | 9.396085313 | 9.550175988 | 9.604151543 |
| Rps10   | 9.943429237 | 9.930142685 | 9.811803909 | 9.613389863 | 9.574597026 | 9.644388243 |
| Rps11   | 10.9269444  | 10.9507403  | 10.88275313 | 10.73588153 | 10.75863577 | 10.6212377  |
| Rps13   | 9.971850872 | 9.914598982 | 9.751081396 | 9.552567026 | 9.552766177 | 9.706520173 |
| Rps14   | 10.7642272  | 10.84349755 | 10.8237757  | 10.60672955 | 10.57843511 | 10.44716744 |
| Rps15   | 10.62155036 | 10.64468732 | 10.72724649 | 10.49124568 | 10.30953776 | 10.46674783 |
| Rps17   | 10.78551909 | 10.78325781 | 10.61387994 | 10.32990959 | 10.46131347 | 10.43651304 |
| Rps19   | 10.24021287 | 10.22139441 | 10.25791063 | 10.05086626 | 9.986454621 | 9.957100652 |
| Rps2    | 9.787152876 | 9.78382514  | 9.6128789   | 9.556569415 | 9.472963192 | 9.289253594 |
| Rps20   | 10.66188232 | 10.60104857 | 10.36309767 | 10.12820277 | 10.30108955 | 10.31546977 |
| Rps23   | 9.567860392 | 9.659951938 | 9.607179872 | 9.480665645 | 9.359190849 | 9.097750267 |
| Rps26   | 10.55997985 | 10.5709985  | 10.94620156 | 10.5192014  | 10.19979048 | 10.41496525 |
| Rps28   | 9.916777402 | 9.932073925 | 10.01700032 | 9.769820892 | 9.725711635 | 9.770941006 |
| Rps29   | 10.3447526  | 10.36912239 | 10.27418596 | 10.16405895 | 10.02240633 | 10.07366486 |
| Rps4l   | 7.81082909  | 7.419843296 | 7.848225027 | 7.30802245  | 7.673004987 | 7.546116814 |
| Rps5    | 11.37462752 | 11.43595471 | 11.33811699 | 11.1476244  | 11.26285597 | 11.16743902 |
| Rps6kb1 | 9.664358947 | 9.777394387 | 9.999704098 | 9.713576389 | 9.799541817 | 9.719134247 |
| Rps7    | 11.32437473 | 11.30869248 | 11.19253107 | 11.04666268 | 11.12039924 | 11.04853385 |
| Rps8    | 10.8153115  | 10.9301133  | 10.56914367 | 10.61634808 | 10.67610659 | 10.55382668 |
| Rps9    | 11.68385044 | 11.61552343 | 11.41597029 | 11.44291845 | 11.37284785 | 11.40846654 |

|          |             |             |             |             |             |             |
|----------|-------------|-------------|-------------|-------------|-------------|-------------|
| Rrm2     | 9.729727316 | 9.415456653 | 9.735492848 | 9.662496867 | 9.208004517 | 9.326002533 |
| Rrnad1   | 7.281549797 | 7.735082723 | 7.606858048 | 7.071182259 | 7.26898723  | 6.968852843 |
| Rrp1b    | 8.246421563 | 8.302146483 | 8.504527138 | 8.131898606 | 7.965133356 | 7.965782904 |
| Rsf1     | 10.79063379 | 10.76603821 | 10.81143747 | 10.72436413 | 10.90670873 | 10.8902269  |
| Rsl24d1  | 7.940736694 | 8.079784332 | 8.112393197 | 7.91211235  | 8.040888925 | 7.823497767 |
| Rsph3b   | 5.336140447 | 4.879886885 | 6.821853535 | 5.101656215 | 5.014011403 | 4.059575235 |
| Rsrc2    | 9.987525772 | 10.06825564 | 10.09643912 | 10.10652639 | 9.8125688   | 9.954969208 |
| Rtf1     | 9.289417352 | 9.391795364 | 9.638249547 | 9.50157714  | 9.516073378 | 9.598700853 |
| Rtkn2    | 7.478228847 | 7.352220649 | 7.316832893 | 7.104370141 | 6.724314878 | 6.951852343 |
| Rtn1     | 10.9058875  | 10.97201546 | 10.8803925  | 10.98785546 | 10.97637546 | 11.20199923 |
| Rundc3b  | 8.91391192  | 9.062149756 | 8.661246298 | 8.838685049 | 9.119922161 | 8.845006077 |
| Runx1    | 4.627849702 | 4.247088592 | 1           | 2.851100857 | 3.749675008 | 4.752037851 |
| Runx1t1  | 10.94311212 | 10.99344391 | 11.05695731 | 10.97445515 | 11.0177412  | 11.25059837 |
| Ruvbl2   | 9.184523103 | 9.183845572 | 9.344885197 | 8.979496412 | 8.839303535 | 8.793452825 |
| Rwdd3    | 5.768201518 | 5.846513718 | 5.683462387 | 5.891676346 | 5.905210499 | 5.958045085 |
| Ryr2     | 8.991476167 | 9.196754803 | 8.931326023 | 9.003151687 | 9.304912034 | 9.296005222 |
| Ryr3     | 8.609775365 | 8.954157135 | 8.655735526 | 8.61898396  | 9.018634899 | 9.038592978 |
| S100a9   | 2.565099681 | 1.40785378  | 1           | 1           | 1           | 1.793876829 |
| S100b    | 3.408645243 | 4.144218708 | 2.346809092 | 4.756726338 | 3.126983752 | 5.036351157 |
| S1pr5    | 2.565099681 | 1.985596612 | 2.346809092 | 3.85969309  | 2.007489679 | 4.293477201 |
| Safb     | 9.921448013 | 9.897898217 | 10.21920524 | 9.955572051 | 9.834022402 | 9.974039779 |
| Sall1    | 8.899780492 | 8.533445122 | 9.249329998 | 8.937142783 | 8.733688366 | 8.76453655  |
| Sall3    | 8.068354845 | 7.778663984 | 8.22830624  | 8.066040091 | 7.54875884  | 8.079720074 |
| Samd3    | 6.083675251 | 5.453483524 | 6.306963417 | 5.730965216 | 5.043777717 | 4.494694577 |
| Sar1a    | 10.00523385 | 9.904798432 | 9.865306614 | 9.745483276 | 9.799541817 | 9.665397606 |
| Satb1    | 9.32686647  | 9.125968691 | 9.39866116  | 9.255432913 | 9.506752484 | 9.543030432 |
| Satb2    | 7.534189854 | 8.015663625 | 8.416027626 | 7.997030751 | 8.211236542 | 8.52119249  |
| Sbds     | 7.651283602 | 7.680985601 | 7.662872168 | 7.373012443 | 7.424156736 | 7.216701442 |
| Scaf4    | 8.538597609 | 8.561162936 | 8.944945201 | 8.743583998 | 8.574557633 | 8.826471886 |
| Scai     | 10.63512001 | 10.5547957  | 10.29383188 | 10.45846578 | 10.52205416 | 10.62660406 |
| Scamp1   | 9.750874752 | 9.729338726 | 9.463179342 | 9.624871514 | 9.759739866 | 9.848769685 |
| Scamp2   | 7.994919915 | 8.107392546 | 8.213378775 | 7.696904902 | 7.644147151 | 7.804683367 |
| Scamp5   | 9.505459072 | 9.393197998 | 9.111202775 | 9.407210109 | 9.389935336 | 9.476235522 |
| Scand1   | 7.515776323 | 7.5860562   | 7.437355307 | 7.298494479 | 7.395584086 | 7.339427003 |
| Scaper   | 10.04429978 | 10.01458643 | 9.984397907 | 10.1119761  | 10.06021717 | 10.30211699 |
| Scarna10 | 8.586437467 | 8.438818737 | 8.159881693 | 8.200008034 | 8.517359046 | 8.125924044 |
| Scarna2  | 7.889215153 | 7.963743951 | 7.651841978 | 7.336234532 | 7.217678952 | 7.655164122 |
| Scg2     | 8.134214136 | 8.444241789 | 7.895750249 | 8.490986459 | 8.493289907 | 8.577695585 |
| Scg3     | 9.790986256 | 9.833231544 | 9.706468884 | 9.766369125 | 9.745092736 | 9.770941006 |
| Scin     | 1           | 1           | 1           | 1           | 1           | 1           |
| Scly     | 5.307880412 | 5.616073469 | 5.594091143 | 4.224165625 | 4.714236588 | 5.159929718 |
| Scml2    | 5.829124602 | 6.431144087 | 5.847135518 | 5.989661022 | 6.101966287 | 6.951852343 |
| Scml4    | 7.036642281 | 7.24444458  | 6.879726671 | 7.279247656 | 7.109240742 | 7.272538694 |
| Scn10a   | 4.67286394  | 4.911553418 | 1.825170741 | 2.358763209 | 1.742960444 | 3.617319577 |
| Scn2a1   | 9.540796447 | 9.761190967 | 9.51887733  | 9.700975053 | 9.810405788 | 9.905056218 |
| Scn7a    | 5.092852815 | 4.247088592 | 2.346809092 | 2.030760869 | 3.333892988 | 4.293477201 |
| Scn9a    | 8.806916008 | 8.6877207   | 8.120417294 | 8.284482401 | 8.418575082 | 8.637395189 |

|           |        |             |             |             |             |             |             |
|-----------|--------|-------------|-------------|-------------|-------------|-------------|-------------|
| Scrn1     |        | 9.606077676 | 9.799777721 | 9.912281462 | 9.893638809 | 9.624696982 | 9.724149156 |
| Scrn3     |        | 6.132833551 | 5.453483524 | 5.228828563 | 4.640865717 | 4.78644219  | 3.926671999 |
| Sdc1      |        | 8.01253802  | 7.721747423 | 7.968677139 | 7.583793375 | 7.224193168 | 7.634004102 |
| Sdc4      |        | 5.848873694 | 5.495880869 | 5.95875192  | 4.224165625 | 4.67673177  | 5.656095563 |
| Sdk1      |        | 8.268585917 | 8.07279893  | 7.950788095 | 8.110278101 | 7.843475333 | 8.228305017 |
| Sec13     |        | 9.402314003 | 9.452256502 | 9.361906506 | 9.400545531 | 9.273850704 | 9.082210654 |
| Sec24d    |        | 6.410421315 | 6.375460809 | 6.802034831 | 6.583144971 | 6.527684741 | 6.789098145 |
| Sec63     |        | 10.15552519 | 10.10809103 | 10.28671883 | 10.01495565 | 10.18400472 | 10.27844807 |
| Selplg    |        | 1.476947654 | 1.40785378  | 1.825170741 | 2.030760869 | 1.418787199 | 4.181261307 |
| Selt      |        | 9.542313393 | 9.56979629  | 9.6100322   | 9.76290908  | 9.681424005 | 9.719134247 |
| Sema3d    |        | 5.544260695 | 5.195006214 | 5.038690263 | 5.011224712 | 5.072942274 | 5.159929718 |
| Sema4a    |        | 7.656896065 | 7.703773087 | 7.595389438 | 7.5993972   | 7.579568276 | 7.676018269 |
| Sema6b    |        | 8.122092354 | 8.284114845 | 7.941759697 | 8.184573446 | 8.022319688 | 8.621356935 |
| Sema6d    |        | 10.14757398 | 10.11830448 | 10.32367712 | 10.17971338 | 10.19979048 | 10.16131687 |
| Sema7a    |        | 7.528078086 | 7.56629706  | 7.818939792 | 7.704139468 | 7.463230973 | 7.62330656  |
| Senp7     |        | 9.385510003 | 9.41269303  | 9.657678367 | 9.296695988 | 9.548879147 | 9.523026928 |
| Sephs1    |        | 10.14657699 | 10.02819207 | 10.17558708 | 9.928030614 | 9.868737901 | 9.753877961 |
| Sepp1     |        | 8.760750124 | 8.806173723 | 8.699243326 | 8.851773261 | 8.769759363 | 8.71501629  |
|           | 11-Sep | 11.02785164 | 10.91016718 | 11.43137176 | 11.11203228 | 10.99696885 | 11.07625289 |
|           | 3-Sep  | 11.48167798 | 11.49952188 | 11.79630578 | 11.58293006 | 11.52140334 | 11.71025994 |
| Serbp1    |        | 11.76891501 | 11.82151114 | 11.88257872 | 11.70559989 | 11.68411189 | 11.72096124 |
| Serpinb1b |        | 3.408645243 | 3.478699897 | 3.031034773 | 2.625832949 | 4.286420738 | 3.22300096  |
| Serpine2  |        | 7.727938134 | 7.739500572 | 7.040597805 | 7.725628009 | 7.751766917 | 7.990966901 |
| Serpinf1  |        | 5.906548925 | 6.07343753  | 6.062349611 | 6.013151561 | 5.937282724 | 5.888273572 |
| Serpinh1  |        | 10.49252872 | 10.54283905 | 10.7153756  | 10.37026193 | 10.18817564 | 10.07169896 |
| Sertad3   |        | 4.432277612 | 4.879886885 | 5.228828563 | 3.370835508 | 4.821233523 | 2.303023309 |
| Sestd1    |        | 11.06156535 | 11.16254351 | 11.03483928 | 11.1052172  | 11.24774894 | 11.20110028 |
| Setbp1    |        | 11.59089112 | 11.64113199 | 11.91983723 | 11.66817163 | 11.68588281 | 11.68283221 |
| Setd1b    |        | 8.457306733 | 8.180698924 | 8.725784132 | 8.452842071 | 8.10582618  | 8.845006077 |
| Setdb2    |        | 6.665565543 | 6.993865632 | 7.090467934 | 6.827969626 | 6.210932461 | 6.369989537 |
| Sez6l     |        | 10.06660908 | 10.13851698 | 10.34609049 | 10.21685811 | 10.2644248  | 10.47122889 |
| Sez6l2    |        | 9.312714524 | 9.110703026 | 9.150916591 | 9.27499792  | 9.258065604 | 9.55151918  |
| Sf1       |        | 10.08754003 | 9.948385921 | 10.44525023 | 10.24317128 | 9.920798064 | 10.13895954 |
| Sf3b4     |        | 7.599764006 | 7.447109957 | 7.358135905 | 7.104370141 | 6.855983658 | 7.066852093 |
| Sfmbt1    |        | 9.086035146 | 8.797725286 | 9.049503843 | 8.940209624 | 8.923771777 | 8.854184641 |
| Sfpq      |        | 12.13740809 | 12.18861412 | 12.36145364 | 12.13130823 | 12.19359911 | 12.13938724 |
| Sfrp1     |        | 9.971850872 | 9.706954616 | 10.41458076 | 9.675437293 | 9.692036708 | 9.693794835 |
| Sfrp2     |        | 7.420009252 | 7.425338011 | 7.758523245 | 7.461053316 | 7.150866018 | 7.568595648 |
| Sgip1     |        | 8.794239632 | 8.806173723 | 8.655735526 | 8.832096146 | 9.104115863 | 8.899221447 |
| Sgms2     |        | 4.143380003 | 4.03344674  | 4.246285218 | 3.959799763 | 3.011219987 | 4.293477201 |
| Sgol2a    |        | 8.707660193 | 8.541057492 | 8.931326023 | 8.42246087  | 8.501357653 | 8.276893869 |
| Sgsm1     |        | 8.544665068 | 8.518098813 | 8.441871979 | 8.265046463 | 8.354698925 | 8.382168562 |
| Sh2d5     |        | 6.241413634 | 6.431144087 | 5.847135518 | 5.759024621 | 6.101966287 | 6.730493894 |
| Sh3bgrl   |        | 10.60131742 | 10.37623257 | 10.59959989 | 10.4922908  | 10.65516699 | 10.50221254 |
| Sh3bp4    |        | 7.310325184 | 7.340635504 | 7.629525334 | 7.583793375 | 7.614700277 | 7.832813749 |
| Sh3bp5    |        | 9.263900079 | 9.209549546 | 9.245666435 | 9.310982162 | 9.311044849 | 9.559958272 |
| Sh3gl1    |        | 8.609775365 | 8.808278125 | 8.993810255 | 8.46991976  | 8.418575082 | 8.526943428 |



|          |             |             |             |             |             |             |
|----------|-------------|-------------|-------------|-------------|-------------|-------------|
| Sh3gl2   | 6.285557633 | 6.576510821 | 6.821853535 | 6.867169543 | 7.102184918 | 7.464562498 |
| Sh3rf1   | 9.41396142  | 9.470974644 | 9.679566996 | 9.558566454 | 9.420038293 | 9.452258132 |
| Shank2   | 8.535554284 | 8.56614582  | 9.189566409 | 8.693574379 | 8.756338204 | 9.191254982 |
| Shb      | 7.874838514 | 8.015663625 | 8.0715893   | 7.568018935 | 7.589693592 | 7.601670527 |
| Shc1     | 7.446175096 | 7.225672326 | 7.057413452 | 6.598755774 | 6.855983658 | 6.917238285 |
| Shc2     | 8.246421563 | 8.268914386 | 8.213378775 | 8.110278101 | 7.976753403 | 8.040053218 |
| Shcbp1l  | 4.432277612 | 2.853470894 | 4.123905703 | 3.85969309  | 3.887381517 | 4.397591105 |
| Shfm1    | 9.011328492 | 9.199964143 | 9.127219725 | 8.845243997 | 8.742791017 | 8.835768745 |
| Shisa2   | 8.304786199 | 8.311078487 | 8.120417294 | 7.955196258 | 8.04825021  | 7.258780673 |
| Shisa4   | 7.062244993 | 6.91794109  | 7.302798206 | 7.014114022 | 6.60957971  | 6.951852343 |
| Shisa5   | 6.537554618 | 7.206652584 | 6.953447591 | 7.126078702 | 7.007173525 | 6.985655341 |
| Shisa7   | 8.418185031 | 8.41692035  | 9.107170597 | 8.774841149 | 8.828655805 | 9.10929611  |
| Shisa8   | 4.143380003 | 3.478699897 | 4.123905703 | 2.625832949 | 2.747440291 | 1.793876829 |
| Shisa9   | 6.270992534 | 6.375460809 | 6.516052763 | 6.773989117 | 6.796030117 | 6.583715671 |
| Shmt1    | 7.191610894 | 6.910124163 | 7.057413452 | 6.773989117 | 6.348472847 | 6.730493894 |
| Shox2    | 8.301206774 | 8.250459875 | 8.335594904 | 8.17939167  | 8.161192283 | 7.804683367 |
| Shroom2  | 9.31980785  | 9.193538309 | 9.154828502 | 9.202775553 | 9.421456218 | 9.559958272 |
| Shroom4  | 6.984032096 | 6.59613151  | 7.13867163  | 7.037212907 | 6.724314878 | 7.230864661 |
| Shtn1    | 9.209562083 | 9.542245439 | 9.539969925 | 9.474332631 | 9.372447364 | 9.683533126 |
| Siah1a   | 8.755528188 | 8.927299847 | 8.884977203 | 8.682628715 | 8.909695986 | 8.968477963 |
| Sidt1    | 4.009405591 | 5.002584686 | 3.678570668 | 5.305666106 | 5.236536614 | 5.737711018 |
| Sidt2    | 8.59230743  | 8.708150645 | 8.683081269 | 8.729471547 | 8.651490603 | 8.826471886 |
| Siglech  | 2.904029779 | 1.985596612 | 2.72911076  | 2.030760869 | 2.007489679 | 1.793876829 |
| Sik3     | 8.460519489 | 8.238024401 | 8.213378775 | 8.205116419 | 8.198060224 | 8.242355329 |
| Simc1    | 8.507871545 | 8.726070861 | 8.846795279 | 8.524066114 | 8.455032148 | 8.444266158 |
| Sin3a    | 10.02598373 | 9.792355129 | 10.15620343 | 9.879329669 | 9.86144349  | 9.675788658 |
| Siva1    | 7.103931669 | 7.14804095  | 7.245252952 | 6.746222061 | 6.796030117 | 6.317866116 |
| Six3os1  | 8.371160451 | 8.492153199 | 8.522805096 | 8.395900718 | 8.154386609 | 8.317277421 |
| Six5     | 6.720197947 | 6.168242543 | 6.388963369 | 5.786548686 | 5.579097119 | 5.776850189 |
| Six6     | 4.323558214 | 4.343109123 | 3.280577348 | 4.376833985 | 3.011219987 | 2.976330056 |
| Ska2     | 8.768547759 | 8.638894724 | 8.6667361   | 8.61898396  | 8.619726378 | 8.583226064 |
| Skida1   | 9.530132927 | 9.201566139 | 9.51887733  | 9.320428285 | 9.073778625 | 8.972698064 |
| Skp2     | 8.674842432 | 8.41139342  | 8.736265233 | 8.54032579  | 8.287863066 | 8.566570616 |
| Sla      | 5.848873694 | 6.244822593 | 5.807924923 | 6.036265739 | 6.715094527 | 7.286166751 |
| Slc12a4  | 6.410421315 | 6.141785093 | 5.639468694 | 5.64335602  | 5.804480268 | 6.291080771 |
| Slc12a5  | 9.123000266 | 9.277961524 | 9.285462875 | 9.267692101 | 9.093481296 | 9.062547759 |
| Slc15a2  | 6.049947112 | 5.862804336 | 7.074035358 | 6.468867128 | 7.02966115  | 7.464562498 |
| Slc16a10 | 6.643119837 | 6.329313082 | 5.683462387 | 5.891676346 | 5.359984332 | 4.970351389 |
| Slc16a7  | 6.285557633 | 6.07343753  | 6.610232669 | 5.517598924 | 5.937282724 | 5.273752905 |
| Slc1a2   | 11.18808533 | 11.09088    | 11.26036751 | 11.16214442 | 11.14206194 | 11.10152369 |
| Slc20a2  | 7.426595337 | 7.05185351  | 7.316832893 | 7.30802245  | 6.99198465  | 7.339427003 |
| Slc22a17 | 9.978589551 | 10.00085127 | 9.709131687 | 9.866490183 | 9.732581793 | 10.07954651 |
| Slc24a3  | 6.462626536 | 6.364061526 | 6.44115009  | 6.867169543 | 6.677612298 | 6.750294335 |
| Slc25a1  | 8.595233479 | 8.551145237 | 8.633479495 | 8.532218858 | 8.457798746 | 8.637395189 |
| Slc25a11 | 8.932541049 | 9.136056794 | 8.922174616 | 8.871185604 | 8.602328401 | 8.456371258 |
| Slc25a24 | 6.70943572  | 6.77031502  | 6.362144593 | 6.249069934 | 6.558942651 | 6.263788702 |
| Slc25a37 | 6.793366059 | 6.536450301 | 7.230500702 | 7.345517279 | 6.724314878 | 7.686333379 |

|          |             |             |             |             |             |             |
|----------|-------------|-------------|-------------|-------------|-------------|-------------|
| Slc25a4  | 11.10686394 | 11.13598037 | 10.80771533 | 10.90395054 | 10.84886862 | 10.9046555  |
| Slc26a8  | 3.511354355 | 3.782574642 | 3.842769234 | 3.635872179 | 3.887381517 | 4.397591105 |
| Slc27a4  | 8.794239632 | 8.946534506 | 8.866012551 | 8.785111498 | 8.822229241 | 9.014233722 |
| Slc2a13  | 7.259585234 | 7.581141728 | 7.583828927 | 7.336234532 | 7.538341062 | 7.352440416 |
| Slc2a3   | 7.484555014 | 7.51568179  | 7.640726807 | 7.461053316 | 7.457713316 | 7.706744944 |
| Slc30a1  | 7.81082909  | 7.703773087 | 7.487850347 | 7.452487101 | 7.925709676 | 7.814121237 |
| Slc35a5  | 7.889215153 | 7.812605244 | 7.651841978 | 7.781413557 | 8.109349512 | 8.185313927 |
| Slc35e3  | 7.673603628 | 7.392051357 | 7.618236209 | 7.527811331 | 7.511962665 | 7.69657526  |
| Slc35f3  | 3.408645243 | 3.298813141 | 3.280577348 | 4.224165625 | 3.011219987 | 4.828538958 |
| Slc38a1  | 10.97435215 | 10.92381873 | 11.17047981 | 11.00699434 | 11.03544338 | 11.14984342 |
| Slc38a2  | 11.29633055 | 11.12462568 | 11.28645518 | 11.1868853  | 11.2453491  | 11.07919144 |
| Slc38a4  | 5.363857532 | 4.745775733 | 4.738542537 | 5.186752068 | 4.473020427 | 5.697480352 |
| Slc39a1  | 7.68463547  | 8.079784332 | 7.72733891  | 7.924553886 | 7.747250999 | 7.523282183 |
| Slc39a11 | 7.112126384 | 7.030380263 | 6.516052763 | 7.461053316 | 7.007173525 | 7.3781203   |
| Slc39a3  | 8.394864328 | 8.543586049 | 8.782510115 | 8.495163134 | 8.381172805 | 8.749858127 |
| Slc39a9  | 8.142239108 | 8.019301644 | 8.605167774 | 8.26993005  | 8.427070391 | 8.456371258 |
| Slc4a10  | 7.850554425 | 8.03016098  | 7.215596043 | 7.967273266 | 8.084503552 | 8.242355329 |
| Slc4a7   | 10.54037722 | 10.44344152 | 10.45797115 | 10.31816996 | 10.47366792 | 10.39780613 |
| Slc6a11  | 5.74730838  | 5.744707001 | 6.189834702 | 5.550080729 | 5.968657436 | 6.583715671 |
| Slc6a5   | 3.781766418 | 3.39155842  | 1           | 3.045898796 | 3.234144523 | 3.22300096  |
| Slc6a6   | 9.876454579 | 9.900859494 | 9.850910634 | 10.09968518 | 10.03635479 | 10.0873516  |
| Slc6a7   | 5.391052138 | 5.635166912 | 5.396800833 | 5.64335602  | 5.937282724 | 5.958045085 |
| Slc7a2   | 6.299977155 | 6.463550801 | 6.159003922 | 6.059015424 | 6.287574716 | 5.217963548 |
| Slc7a6   | 9.267573153 | 8.89598082  | 9.170370925 | 9.074669371 | 9.119922161 | 8.845006077 |
| Slc8a1   | 11.01534446 | 11.29937165 | 10.94958341 | 11.07763028 | 11.35403689 | 11.3649815  |
| Slc8a3   | 7.02800607  | 7.380782922 | 7.358135905 | 7.443869719 | 7.604749556 | 7.634004102 |
| Slc9a6   | 9.400642383 | 9.515446821 | 9.256629333 | 9.413844042 | 9.613575215 | 9.493960617 |
| Sln3     | 2.121272526 | 1.40785378  | 1           | 2.030760869 | 3.514815644 | 3.22300096  |
| Slit3    | 6.654386342 | 6.536450301 | 6.220020382 | 6.229147667 | 6.40690416  | 6.690058614 |
| Smarca1  | 9.395615872 | 9.379109904 | 9.178079794 | 9.272566756 | 9.509421747 | 9.443162866 |
| Smarcc1  | 11.15425973 | 11.12504782 | 11.56157855 | 11.28784398 | 11.16509798 | 11.29255849 |
| Smarcc2  | 11.66517475 | 11.74447866 | 11.94264445 | 11.85891277 | 11.54890922 | 11.75871954 |
| Smc1a    | 10.64856322 | 10.59069379 | 10.88981194 | 10.76471162 | 10.5488992  | 10.4303893  |
| Smc2     | 10.23927791 | 10.06913342 | 10.23960894 | 10.00327287 | 9.892448845 | 9.976143254 |
| Smc3     | 10.66188232 | 10.7265258  | 10.79649095 | 10.60479812 | 10.62040111 | 10.60637644 |
| Smc4     | 10.66675852 | 10.50765837 | 10.61813653 | 10.47758984 | 10.40078086 | 10.33034538 |
| Smc6     | 9.9808288   | 9.915575386 | 9.862917238 | 9.761175941 | 9.950566501 | 9.984526618 |
| Smdt1    | 8.520240608 | 8.325843359 | 8.473539665 | 8.142588557 | 7.988280606 | 8.110686546 |
| Smek1    | 10.17521357 | 10.06385867 | 10.24144959 | 10.08867132 | 9.988369318 | 10.03382884 |
| Smim14   | 8.492259579 | 8.593248235 | 8.279368605 | 8.418067996 | 8.354698925 | 8.566570616 |
| Smim3    | 3.511354355 | 3.56087634  | 3.031034773 | 3.509431521 | 3.427188559 | 1.793876829 |
| Smn1     | 6.488037412 | 6.495245539 | 6.93536751  | 5.891676346 | 6.548598415 | 6.808115555 |
| Smndc1   | 7.775148835 | 7.812605244 | 8.079842927 | 7.808517735 | 7.945556175 | 7.488337929 |
| Smoc1    | 7.576262265 | 7.489692277 | 7.560426231 | 7.815214956 | 7.860301472 | 7.93150545  |
| Smoc2    | 3.047666507 | 1.985596612 | 1.825170741 | 3.370835508 | 2.007489679 | 3.433590479 |
| Smpd3    | 9.361650651 | 9.39879494  | 9.49129711  | 9.413844042 | 9.356228341 | 9.584983343 |
| Smpdl3b  | 4.077947413 | 2.978340632 | 3.031034773 | 2.625832949 | 1.418787199 | 2.303023309 |

|          |             |             |             |   |             |             |             |
|----------|-------------|-------------|-------------|---|-------------|-------------|-------------|
| Snai1    | 2.904029779 | 2.397010683 |             | 1 | 1.605542449 | 2.230948887 | 1.793876829 |
| Snai2    | 3.047666507 | 1.40785378  | 2.346809092 |   | 2.358763209 | 2.230948887 | 2.303023309 |
| Snap25   | 9.006940412 | 9.193538309 | 9.107170597 |   | 9.171799586 | 9.222718197 | 9.289253594 |
| Snap47   | 9.90621291  | 10.04256469 | 9.727634952 |   | 9.858407088 | 9.82226242  | 9.90284642  |
| Sncb     | 3.511354355 | 4.03344674  | 4.123905703 |   | 4.141311987 | 4.516128927 | 5.217963548 |
| Sncg     | 6.938675524 | 6.016328018 | 4.46371154  |   | 5.941500387 | 5.406550135 | 5.477553384 |
| Sned1    | 7.490853563 | 7.510521207 | 7.259855879 |   | 7.725628009 | 7.501274763 | 7.128671755 |
| Snhg11   | 11.1109588  | 11.1007864  | 10.8768443  |   | 11.22258923 | 11.49100134 | 11.62903722 |
| Snhg14   | 9.563384845 | 9.366311913 | 9.285462875 |   | 9.422642099 | 9.846743083 | 9.709051826 |
| Snora23  | 4.67286394  | 5.453483524 | 5.038690263 |   | 5.057148905 | 5.101528924 | 5.429238262 |
| Snora28  | 3.93744424  | 4.388824542 | 3.842769234 |   | 5.517598924 | 4.286420738 | 5.159929718 |
| Snord15b | 6.665565543 | 6.993865632 | 7.330732364 |   | 7.104370141 | 6.77843274  | 7.258780673 |
| Snord17  | 7.727938134 | 8.441532812 | 8.672205092 |   | 8.240377438 | 8.011062327 | 7.940151466 |
| Snord22  | 6.180371882 | 6.726476939 | 7.169935286 |   | 6.905332463 | 6.599593485 | 6.627197922 |
| Snord95  | 4.143380003 | 3.638623163 | 3.842769234 |   | 2.358763209 | 2.007489679 | 2.303023309 |
| Snord99  | 1.834785459 | 1.725454411 | 1.825170741 |   | 3.045898796 | 3.234144523 | 3.22300096  |
| Snrpb    | 9.64754335  | 9.739299371 | 9.814279383 |   | 9.318072547 | 9.455074943 | 9.409314223 |
| Snrpd3   | 7.168221945 | 7.293341578 | 7.512450212 |   | 7.461053316 | 7.191323905 | 7.173357913 |
| Snrpe    | 9.075596709 | 8.741570507 | 8.709918311 |   | 8.81549102  | 8.94364477  | 8.739988881 |
| Sntb1    | 4.009405591 | 4.710205239 | 1.825170741 |   | 3.045898796 | 3.514815644 | 2.976330056 |
| Snx17    | 8.946356713 | 8.96551609  | 8.875526039 |   | 8.675285195 | 8.577104454 | 8.583226064 |
| Sobp     | 8.495395517 | 8.476358863 | 8.976232046 |   | 8.615151257 | 8.883185197 | 9.154577076 |
| Socs2    | 8.421485998 | 8.319955531 | 8.243080832 |   | 8.200008034 | 8.395673275 | 8.303941444 |
| Socs3    | 5.829124602 | 6.181291514 | 6.44115009  |   | 5.673154141 | 5.014011403 | 5.524302751 |
| Sorbs1   | 9.667142589 | 9.834264578 | 9.900680363 |   | 9.91093719  | 9.881157436 | 10.04389144 |
| Sorbs2   | 10.6555886  | 10.60165537 | 10.86256355 |   | 10.57452557 | 10.64184767 | 10.70352341 |
| Sos1     | 10.15453368 | 10.07526302 | 10.33578911 |   | 10.15220563 | 10.33458954 | 10.07366486 |
| Sostdc1  | 4.205973248 | 4.343109123 | 3.678570668 |   | 4.053408608 | 4.072049632 | 4.828538958 |
| Sox10    | 4.323558214 | 4.343109123 | 2.72911076  |   | 3.752118759 | 3.820170665 | 3.22300096  |
| Sox11    | 14.27653725 | 14.23583561 | 14.43207    |   | 14.24388812 | 14.29841344 | 14.35243142 |
| Sox12    | 8.669299485 | 8.833294386 | 9.289026884 |   | 8.924809803 | 8.457798746 | 8.438175304 |
| Sox2     | 10.21380215 | 10.07263924 | 10.25244446 |   | 10.03230433 | 9.85411201  | 9.846471898 |
| Sox21    | 8.193340801 | 7.56629706  | 8.046541268 |   | 7.630107498 | 7.579568276 | 7.523282183 |
| Sox2ot   | 8.998124008 | 8.87605545  | 9.095006004 |   | 9.046486289 | 8.847765497 | 8.899221447 |
| Sox5     | 10.1355644  | 10.30499403 | 10.36647518 |   | 10.32052554 | 10.46956151 | 10.55100716 |
| Sox9     | 8.763354021 | 8.571111553 | 8.870777137 |   | 8.693574379 | 8.701369048 | 9.058582815 |
| Sp1      | 10.09582811 | 10.03449772 | 10.21733597 |   | 10.13758473 | 10.10237619 | 9.999081295 |
| Sp3      | 10.7655266  | 10.7698226  | 10.85897117 |   | 10.80900306 | 10.72113108 | 10.68306589 |
| Sp4      | 10.1742355  | 10.14768724 | 10.16786484 |   | 10.13624818 | 10.16804433 | 10.17053113 |
| Sp8      | 7.08740126  | 6.948792021 | 7.512450212 |   | 7.354740679 | 7.191323905 | 7.173357913 |
| Sp9      | 6.938675524 | 7.127962371 | 7.629525334 |   | 7.189310683 | 7.137123938 | 7.187950923 |
| Spaca6   | 7.673603628 | 7.581141728 | 7.895750249 |   | 7.560066561 | 7.230678103 | 7.686333379 |
| Spag4    | 5.788796395 | 5.364757319 | 5.448709844 |   | 5.011224712 | 4.983617975 | 4.059575235 |
| Spag5    | 9.083953492 | 8.931167349 | 9.405244375 |   | 8.795309251 | 8.636917043 | 8.647989154 |
| Spag9    | 12.33567066 | 12.29580249 | 12.27782845 |   | 12.31026483 | 12.35497046 | 12.23690795 |
| Sparc    | 9.81879074  | 9.816601598 | 9.93065134  |   | 9.928030614 | 9.677869018 | 9.673197903 |
| Sparcl1  | 9.524003912 | 9.628141068 | 9.372023724 |   | 9.548553502 | 9.656353146 | 9.862480081 |

|          |             |             |             |             |             |             |
|----------|-------------|-------------|-------------|-------------|-------------|-------------|
| Spats1   | 4.205973248 | 3.849499474 | 4.246285218 | 3.635872179 | 3.675556897 | 3.22300096  |
| Spats2l  | 7.701026658 | 7.833420063 | 7.789047758 | 7.435200555 | 7.791786408 | 7.546116814 |
| Spc25    | 8.101660269 | 7.921597309 | 7.838529183 | 8.115713679 | 7.677759001 | 7.869487519 |
| Spcs1    | 8.01253802  | 8.144511291 | 8.021050658 | 7.841697207 | 7.872793531 | 7.814121237 |
| Specc1   | 8.737101111 | 8.664676202 | 8.807575309 | 8.76103262  | 8.54624179  | 8.699822577 |
| Speer4b  | 4.716516059 | 4.343109123 | 5.104893407 | 4.699958789 | 5.76927757  | 5.697480352 |
| Spenn    | 10.52357978 | 10.43325085 | 11.06529483 | 10.54360417 | 10.45232455 | 10.69588579 |
| Sphkap   | 7.759582963 | 8.019301644 | 7.818939792 | 7.753790403 | 8.10582618  | 8.063983964 |
| Spin1    | 10.72669352 | 10.69275147 | 10.73641235 | 10.68742577 | 10.85412824 | 10.83566598 |
| Spock2   | 9.653170355 | 10.01822717 | 10.02129217 | 9.903099992 | 9.955468732 | 10.18151111 |
| Sppl2b   | 7.926866847 | 8.07279893  | 7.950788095 | 7.583793375 | 7.83072568  | 7.676018269 |
| Spta1    | 4.533375098 | 4.089895615 | 3.493254909 | 3.752118759 | 3.427188559 | 2.976330056 |
| Sptbn1   | 12.5547928  | 12.56117663 | 12.56514873 | 12.58906924 | 12.58067256 | 12.67820025 |
| Sptbn4   | 7.785433554 | 8.051637466 | 8.120417294 | 8.0938474   | 8.070111351 | 8.432058627 |
| Srcap    | 10.85735479 | 10.92333339 | 11.37127807 | 11.20357207 | 10.95744008 | 11.22252203 |
| Srek1    | 10.20616656 | 9.990695049 | 10.32888043 | 10.16798851 | 10.1120678  | 10.01758125 |
| Srf      | 8.25013935  | 8.08326439  | 7.848225027 | 7.614834063 | 7.80053086  | 7.557400011 |
| Srgap1   | 10.12547948 | 10.06825564 | 10.29027974 | 10.18101028 | 10.18233297 | 10.43192267 |
| Srgap3   | 11.64766419 | 11.50439744 | 11.90423598 | 11.68060311 | 11.70551174 | 11.75136935 |
| Srp68    | 8.388131439 | 8.08326439  | 8.599438142 | 8.439899818 | 8.237233561 | 8.375809226 |
| Srp9     | 8.034262341 | 8.250459875 | 8.144225238 | 8.17939167  | 7.925709676 | 8.192568664 |
| Srrm1    | 9.610422918 | 9.442805565 | 9.794355633 | 9.715367628 | 9.546281964 | 9.71662024  |
| Srrm2    | 13.0078623  | 12.94020192 | 13.32192321 | 13.09067012 | 13.02569827 | 13.10463031 |
| Srrm4    | 9.366796691 | 9.494689396 | 10.0018775  | 9.830580797 | 9.74395985  | 9.969823607 |
| Srrt     | 10.34822573 | 10.50830573 | 10.56326887 | 10.28839603 | 10.06112712 | 10.1996274  |
| Srsf1    | 12.28424416 | 12.21026078 | 12.27378702 | 12.15360938 | 12.19401398 | 12.11859034 |
| Srsf11   | 10.24860037 | 10.26034515 | 10.47996637 | 10.31581053 | 10.18567454 | 10.35480221 |
| Srsf12   | 7.400068652 | 7.457873945 | 6.988941883 | 7.614834063 | 7.644147151 | 7.612529102 |
| Ss18     | 9.433712221 | 9.40714985  | 9.45368364  | 9.207874165 | 8.939692011 | 8.972698064 |
| Ssb      | 10.53047512 | 10.61794313 | 10.55884702 | 10.4292958  | 10.41508655 | 10.48014947 |
| Ssh3     | 6.730880483 | 6.795992396 | 6.698639411 | 7.059947778 | 6.7695529   | 7.050974221 |
| Ssrp1    | 10.66048608 | 10.65173615 | 10.85416737 | 10.56660908 | 10.49873569 | 10.61315054 |
| Sssca1   | 6.6087826   | 6.699520106 | 6.632847408 | 6.598755774 | 6.474034446 | 6.444805259 |
| Sstr4    | 1.476947654 | 2.853470894 | 3.493254909 | 2.851100857 | 3.011219987 | 3.22300096  |
| St14     | 1.834785459 | 1.40785378  | 1           | 1.605542449 | 1           | 1           |
| St3gal3  | 7.917545645 | 7.685571983 | 7.524594614 | 7.689633874 | 7.51727707  | 7.634004102 |
| St5      | 7.266943973 | 7.397652741 | 6.719919814 | 7.147465445 | 7.066378704 | 7.128671755 |
| St6gal2  | 7.160340601 | 7.615196579 | 7.572175032 | 7.583793375 | 7.463230973 | 7.511727889 |
| St8sia1  | 9.579727749 | 9.585832419 | 9.719734022 | 9.437910763 | 9.741691406 | 9.579459609 |
| St8sia2  | 9.461237606 | 9.561087048 | 9.97778807  | 9.729618038 | 9.817962183 | 9.942113989 |
| St8sia3  | 8.663735161 | 8.726070861 | 8.504527138 | 8.486797657 | 8.971014936 | 9.010133557 |
| St8sia4  | 9.779455421 | 9.927240969 | 9.838803268 | 9.757703404 | 10.03820443 | 9.787804599 |
| Stag1    | 10.59621454 | 10.53777487 | 10.65589109 | 10.4227327  | 10.34881838 | 10.47271949 |
| Stam2    | 8.789137729 | 8.627021812 | 8.736265233 | 8.660485057 | 8.656315924 | 8.76453655  |
| Stard13  | 6.561690132 | 6.340989138 | 6.306963417 | 6.288107667 | 6.262476989 | 5.737711018 |
| Stard3nl | 7.690119918 | 8.117610921 | 7.706168466 | 7.682326016 | 8.007290269 | 7.93150545  |
| Stard4   | 7.244754184 | 7.281271817 | 7.437355307 | 7.126078702 | 7.366434099 | 7.113463403 |

|          |             |             |             |             |             |             |
|----------|-------------|-------------|-------------|-------------|-------------|-------------|
| Stat1    | 7.103931669 | 7.127962371 | 7.302798206 | 6.760172391 | 6.62934715  | 6.149144468 |
| Stat2    | 7.310325184 | 7.653156834 | 7.411429183 | 7.880530849 | 7.40708114  | 7.002264399 |
| Stau1    | 9.520929612 | 9.49076391  | 9.831489774 | 9.540492802 | 9.527969572 | 9.696348898 |
| Stc2     | 3.178288549 | 1.985596612 | 2.346809092 | 1.605542449 | 2.594940123 | 1.793876829 |
| Steap2   | 8.62130425  | 8.730516349 | 8.570443605 | 8.560396027 | 8.673078574 | 8.78387832  |
| Stil     | 8.055664379 | 7.643759998 | 7.905070272 | 7.732720314 | 7.452174475 | 7.511727889 |
| Stmn2    | 11.14630153 | 11.24603205 | 11.10829338 | 11.17521881 | 11.23369323 | 11.39201747 |
| Stoml2   | 8.849201108 | 8.743771211 | 8.693876066 | 8.21020678  | 8.315580273 | 8.538376983 |
| Ston1    | 4.840066407 | 5.169039459 | 5.448709844 | 5.379823897 | 5.579097119 | 5.524302751 |
| Ston2    | 8.286799598 | 8.187182071 | 8.812536511 | 8.240377438 | 8.300247612 | 8.276893869 |
| Stox2    | 11.65644604 | 11.66280917 | 11.88375773 | 11.67968592 | 11.69792622 | 11.7013871  |
| Stra6    | 5.544260695 | 5.537067746 | 5.639468694 | 5.379823897 | 5.406550135 | 6.468905804 |
| Strbp    | 12.02499207 | 11.97598488 | 12.06410148 | 11.99859076 | 12.12106062 | 12.10999535 |
| Strn3    | 10.60204493 | 10.55917593 | 10.69402757 | 10.57353839 | 10.61792965 | 10.56644677 |
| Stx1a    | 7.865173874 | 8.253552067 | 8.029597669 | 7.854758244 | 8.133774812 | 8.249329503 |
| Stx1b    | 7.465492678 | 7.905960762 | 7.895750249 | 7.711337936 | 7.847700302 | 7.756545074 |
| Stxbp1   | 9.58856464  | 9.683071419 | 9.853319962 | 9.708189289 | 9.787496192 | 10.03180787 |
| Stxbp4   | 8.418185031 | 8.062256997 | 8.460955881 | 8.158476417 | 8.262770399 | 8.170694084 |
| Sugp1    | 8.253847581 | 8.331707257 | 8.144225238 | 8.240377438 | 8.303327208 | 8.310624842 |
| Sulf2    | 9.572322099 | 9.402978443 | 9.506684501 | 9.322780184 | 9.400039607 | 9.434009897 |
| Sult4a1  | 8.055664379 | 8.471055424 | 8.09620986  | 7.997030751 | 7.953418955 | 8.206969603 |
| Supt16   | 10.75182415 | 10.72039274 | 10.85777172 | 10.7411664  | 10.58224343 | 10.78377179 |
| Susd5    | 1.476947654 | 1.725454411 | 1           | 2.030760869 | 1.418787199 | 1.793876829 |
| Suv39h1  | 8.752910114 | 8.476358863 | 8.866012551 | 8.457130482 | 8.424244176 | 8.087524227 |
| Suv39h2  | 7.81585499  | 7.787224452 | 7.330732364 | 7.64522093  | 7.817862347 | 7.590729603 |
| Suz12    | 10.14358189 | 10.15845021 | 10.20040264 | 10.02076175 | 10.11907557 | 10.05388434 |
| Sv2a     | 9.430439141 | 9.470974644 | 9.469475264 | 9.51192031  | 9.470225549 | 9.636430179 |
| Sv2b     | 6.891846582 | 7.187378743 | 6.84140367  | 6.841154966 | 7.137123938 | 7.47649919  |
| Svop     | 8.897411738 | 9.273398729 | 9.015486045 | 8.949371226 | 8.945617096 | 8.826471886 |
| Syn1     | 7.136434895 | 7.581141728 | 7.673818665 | 8.099345118 | 7.961239115 | 7.93150545  |
| Syn2     | 8.304786199 | 8.394684441 | 8.159881693 | 8.110278101 | 8.427070391 | 8.363005837 |
| Syn3     | 9.371924442 | 9.478922954 | 9.668664193 | 9.680947854 | 9.696728521 | 9.696348898 |
| Syncrip  | 11.53864836 | 11.44138852 | 11.50677075 | 11.51770485 | 11.6578856  | 11.47319399 |
| Syne1    | 9.32510505  | 9.529546256 | 8.953953748 | 9.437910763 | 9.531913271 | 9.403073682 |
| Syne2    | 12.84608998 | 12.84961761 | 13.01778713 | 12.7210799  | 12.71262779 | 12.62053568 |
| Syngr1   | 8.089260662 | 8.241143333 | 7.86742339  | 8.260146288 | 8.109349512 | 8.438175304 |
| Synj2bp  | 9.153097115 | 9.294569385 | 9.299666387 | 9.110503108 | 9.314101507 | 9.176695524 |
| Synm     | 7.259585234 | 7.086946925 | 6.761561469 | 6.416976829 | 7.059109572 | 6.730493894 |
| Synpo    | 5.02503232  | 4.144218708 | 5.498815825 | 3.370835508 | 4.335381646 | 3.433590479 |
| Syt16    | 8.333106318 | 8.551145237 | 7.977539161 | 8.400361505 | 8.726823489 | 8.720045509 |
| Syt4     | 10.23740617 | 10.19348935 | 10.05726642 | 10.10516074 | 10.2933662  | 10.32705292 |
| Syt5     | 7.840725169 | 7.833420063 | 7.857856143 | 7.821881231 | 7.872793531 | 8.125924044 |
| Taf12    | 7.43967799  | 7.730651305 | 7.72733891  | 6.930224866 | 7.24995982  | 7.216701442 |
| Taf15    | 8.635586996 | 8.812477742 | 9.146994045 | 8.927902946 | 8.619726378 | 8.845006077 |
| Tal2     | 6.882295587 | 6.837797832 | 6.44115009  | 6.598755774 | 6.299961727 | 5.613488471 |
| Tardbp   | 11.06526314 | 10.84041603 | 11.11734296 | 10.99745664 | 10.92381816 | 10.88687664 |
| Tbc1d10a | 6.211215576 | 6.257199856 | 5.994117534 | 6.814662667 | 6.143798956 | 6.899614759 |

|          |             |             |             |             |             |             |
|----------|-------------|-------------|-------------|-------------|-------------|-------------|
| Tbc1d22a | 7.611372851 | 7.556315072 | 7.606858048 | 7.354740679 | 7.5642458   | 7.511727889 |
| Tbc1d24  | 9.787152876 | 9.84352875  | 9.774152877 | 9.879329669 | 9.882187587 | 9.924793549 |
| Tbc1d4   | 7.963560843 | 7.886173697 | 7.72733891  | 7.607136278 | 7.658648222 | 8.040053218 |
| Tbcel    | 8.437878486 | 8.354927372 | 8.409493545 | 8.153199881 | 8.275371286 | 8.432058627 |
| Tbp      | 8.347060598 | 8.174186511 | 8.19829524  | 8.303659976 | 8.287863066 | 8.155924569 |
| Tbr1     | 9.145132481 | 8.997222457 | 9.766503305 | 9.262800919 | 9.388486075 | 9.427875497 |
| Tbx15    | 4.009405591 | 4.710205239 | 4.123905703 | 3.370835508 | 2.885350385 | 3.617319577 |
| Tbx18    | 7.168221945 | 7.008582571 | 6.491514775 | 6.4517769   | 6.813415432 | 6.56147301  |
| Tbx2     | 5.726108215 | 5.195006214 | 5.547239836 | 4.141311987 | 5.043777717 | 5.327464956 |
| Tbx3     | 4.627849702 | 4.144218708 | 5.038690263 | 3.509431521 | 3.011219987 | 4.059575235 |
| Tcea1    | 9.190340021 | 9.083158698 | 9.070364715 | 9.063462118 | 9.059278492 | 8.93858647  |
| Tceal6   | 5.391052138 | 5.596723939 | 5.038690263 | 5.96578166  | 5.838844419 | 5.923581073 |
| Tceal8   | 8.340100329 | 8.328778287 | 8.293631946 | 8.490986459 | 8.452260234 | 8.626722855 |
| Tceb1    | 8.401565941 | 8.216001016 | 8.314765989 | 8.503480383 | 8.641791272 | 8.462385932 |
| Tcerg1   | 10.2166551  | 10.28322061 | 10.46586513 | 10.34849653 | 10.34508753 | 10.41806328 |
| Tcf24    | 4.205973248 | 2.205919617 | 2.346809092 | 4.224165625 | 4.072049632 | 3.617319577 |
| Tcf3     | 10.04750802 | 9.901845237 | 10.23037029 | 9.8809266   | 9.633288357 | 9.714101844 |
| Tcf4     | 12.01492049 | 12.02950446 | 12.32416039 | 11.97149129 | 12.12824204 | 12.1431365  |
| Tcf7l2   | 9.812518428 | 9.600478442 | 10.37320657 | 9.835530481 | 9.904666785 | 9.907262637 |
| Tcof1    | 8.498524653 | 8.525792373 | 8.570443605 | 8.400361505 | 7.917693995 | 8.221228213 |
| Tdp2     | 8.322551313 | 8.308107292 | 7.706168466 | 8.220333933 | 8.112864261 | 8.03198727  |
| Tdtd7    | 7.738563721 | 7.878182253 | 7.606858048 | 7.435200555 | 7.300152323 | 7.590729603 |
| Tead2    | 10.08546055 | 9.915575386 | 10.10859168 | 9.851907846 | 9.568210409 | 9.797353168 |
| Tead3    | 6.132833551 | 5.956864296 | 5.922497536 | 5.379823897 | 6.275080428 | 5.524302751 |
| Tek      | 6.783137934 | 7.5613147   | 7.398289287 | 6.942511838 | 7.24995982  | 6.808115555 |
| Ten1     | 7.05376114  | 6.672049976 | 6.540180369 | 6.502451963 | 6.589537655 | 6.056756594 |
| Tenm1    | 8.826969347 | 9.157675321 | 8.762139616 | 8.864743803 | 9.178119174 | 8.908062522 |
| Terc     | 7.036642281 | 6.925715892 | 6.719919814 | 6.167675041 | 6.223992267 | 5.852080256 |
| Tet1     | 10.08857865 | 10.06297767 | 10.05935487 | 10.07338865 | 10.18567454 | 10.19421636 |
| Tet3     | 10.9367821  | 10.80923333 | 11.41433948 | 11.0179216  | 10.92181579 | 11.14049565 |
| Tex30    | 6.910760951 | 6.505657584 | 6.632847408 | 6.381316533 | 6.463060749 | 5.613488471 |
| Tfap2b   | 9.548365278 | 9.49076391  | 9.784289618 | 9.613389863 | 9.63817484  | 9.665397606 |
| Tfap2c   | 7.120274815 | 7.299338803 | 7.487850347 | 6.644599561 | 6.796030117 | 6.627197922 |
| Tfdp2    | 9.739017485 | 9.587058616 | 9.641041164 | 9.484872263 | 9.702571912 | 9.625750677 |
| Tfip11   | 8.130184848 | 7.791485714 | 7.959760344 | 7.815214956 | 7.624582834 | 7.860406105 |
| Tgfa     | 6.226393616 | 6.484757804 | 5.885308556 | 6.880003011 | 6.517113106 | 6.968852843 |
| Tgfb1i1  | 3.93744424  | 4.673735516 | 4.738542537 | 5.379823897 | 4.335381646 | 5.888273572 |
| Tgfb3    | 5.848873694 | 5.971961575 | 6.306963417 | 5.840069872 | 5.905210499 | 5.737711018 |
| Tgfb1    | 6.049947112 | 5.294437552 | 5.168191412 | 5.144831462 | 5.262085683 | 4.293477201 |
| Tgibr1   | 10.67231122 | 10.38964612 | 10.72987126 | 10.58239886 | 10.58730559 | 10.43498454 |
| Tgif1    | 6.631764656 | 6.101166306 | 6.719919814 | 5.58184729  | 5.804480268 | 5.737711018 |
| Tgm3     | 2.121272526 | 1.725454411 | 1.825170741 | 2.851100857 | 1.742960444 | 1.793876829 |
| Tgoln1   | 7.50336876  | 7.525947903 | 7.006366839 | 7.704139468 | 7.738176533 | 7.568595648 |
| Tgs1     | 9.0963986   | 9.076189655 | 9.372023724 | 9.205327112 | 9.254887752 | 9.12833619  |
| Thbd     | 5.363857532 | 5.516621281 | 5.726154136 | 5.759024621 | 5.638828837 | 4.970351389 |
| Thbs1    | 8.034262341 | 7.83754723  | 7.475391307 | 7.718500666 | 7.594729725 | 7.869487519 |
| Thbs2    | 5.092852815 | 5.516621281 | 3.493254909 | 5.227488897 | 4.516128927 | 4.901186937 |

|          |             |             |             |             |             |             |
|----------|-------------|-------------|-------------|-------------|-------------|-------------|
| Them7    | 1           | 1.985596612 | 1           | 1           | 1.742960444 | 1           |
| Thoc2    | 10.86707177 | 10.85474047 | 10.87921074 | 10.81820066 | 10.82656642 | 10.78617156 |
| Thoc3    | 8.652541711 | 8.833294386 | 8.6667361   | 8.452842071 | 8.378255139 | 8.297226941 |
| Thsd1    | 6.100248163 | 6.194223517 | 6.415292686 | 6.416976829 | 6.538179474 | 6.317866116 |
| Thsd7a   | 10.80902401 | 10.56354289 | 10.51842838 | 10.73057723 | 10.75019718 | 10.54818212 |
| Thsd7b   | 7.922213774 | 7.967515106 | 7.706168466 | 7.519633571 | 7.485092966 | 7.716843444 |
| Tiam2    | 9.552887589 | 10.06297767 | 9.999704098 | 9.874528242 | 10.11031053 | 10.20501822 |
| Timeless | 8.353987448 | 8.311078487 | 8.558680638 | 8.131898606 | 8.014824549 | 7.878512125 |
| Timm9    | 6.984032096 | 6.761653322 | 6.491514775 | 7.373012443 | 6.961118584 | 6.730493894 |
| Timmcdc1 | 7.497124732 | 7.615196579 | 7.398289287 | 7.841697207 | 7.751766917 | 7.69657526  |
| Timp2    | 8.146234916 | 8.284114845 | 8.190693919 | 8.355120529 | 8.363577639 | 8.583226064 |
| Tjp2     | 8.731792711 | 8.548629906 | 8.473539665 | 8.313154006 | 8.36946657  | 8.228305017 |
| Tlk1     | 9.698774295 | 9.482880747 | 9.701128488 | 9.574444018 | 9.603616704 | 9.726650089 |
| Tln2     | 9.375332845 | 9.23636736  | 9.200962291 | 9.124051742 | 9.402913591 | 9.139640778 |
| Tlx1     | 1.834785459 | 1.40785378  | 1           | 1           | 2.230948887 | 1.793876829 |
| Tlx3     | 1.834785459 | 2.716760345 | 1           | 1.605542449 | 2.424393538 | 1.793876829 |
| Tmbim1   | 5.726108215 | 5.796508198 | 5.448709844 | 5.840069872 | 5.921335734 | 5.656095563 |
| Tmed2    | 8.444383682 | 8.523232409 | 8.746670738 | 8.153199881 | 8.327730146 | 8.03198727  |
| Tmed5    | 7.338537835 | 7.281271817 | 7.106715447 | 7.279247656 | 7.634398156 | 7.62330656  |
| Tmed7    | 9.548365278 | 9.56482602  | 9.554849468 | 9.588194975 | 9.786396132 | 9.773362192 |
| Tmem101  | 6.643119837 | 6.804450958 | 7.074035358 | 7.219916879 | 6.619497285 | 6.845414449 |
| Tmem119  | 4.143380003 | 3.56087634  | 3.842769234 | 2.851100857 | 3.749675008 | 3.617319577 |
| Tmem121  | 6.211215576 | 6.463550801 | 6.516052763 | 5.840069872 | 6.262476989 | 6.56147301  |
| Tmem123  | 8.055664379 | 7.866111468 | 7.876927609 | 7.607136278 | 7.860301472 | 7.922807306 |
| Tmem132a | 10.64291818 | 10.66282685 | 10.67780664 | 10.58338001 | 10.45578846 | 10.75833025 |
| Tmem132b | 8.618430655 | 8.837421913 | 8.846795279 | 8.899822977 | 9.055630573 | 9.001898102 |
| Tmem138  | 7.152415964 | 6.586354521 | 6.898513064 | 6.399256858 | 6.484925303 | 6.119001134 |
| Tmem145  | 6.843446461 | 7.030380263 | 7.385028612 | 7.591616383 | 7.237134017 | 7.511727889 |
| Tmem147  | 7.98156369  | 8.134482339 | 7.968677139 | 8.158476417 | 8.140678183 | 8.015718814 |
| Tmem167  | 10.19270627 | 9.956947591 | 10.03196627 | 10.19391557 | 10.24853566 | 10.12006007 |
| Tmem170b | 9.967340869 | 9.935928668 | 10.04256197 | 9.853535404 | 10.03079158 | 10.0011486  |
| Tmem175  | 7.331536226 | 7.546263538 | 7.758523245 | 7.126078702 | 7.634398156 | 7.230864661 |
| Tmem181a | 6.803522181 | 7.058940817 | 7.122782017 | 7.209786787 | 7.24995982  | 7.488337929 |
| Tmem196  | 5.219618891 | 5.270214764 | 4.123905703 | 5.64335602  | 5.558624041 | 5.776850189 |
| Tmem200b | 2.565099681 | 3.093258183 | 1.825170741 | 2.625832949 | 1.418787199 | 2.67860439  |
| Tmem208  | 7.303184965 | 7.369425779 | 7.302798206 | 7.037212907 | 7.095094417 | 7.128671755 |
| Tmem229b | 9.188403653 | 9.267292467 | 9.174230508 | 9.074669371 | 9.242105879 | 9.212822325 |
| Tmem246  | 7.338537835 | 7.748295889 | 7.344499199 | 7.452487101 | 7.634398156 | 7.832813749 |
| Tmem30b  | 1.834785459 | 1.985596612 | 1           | 1.605542449 | 1.418787199 | 1           |
| Tmem42   | 4.989887769 | 4.911553418 | 4.652620793 | 5.057148905 | 4.888396012 | 5.656095563 |
| Tmem44   | 9.402314003 | 9.572275018 | 9.601458241 | 9.497419019 | 9.543680096 | 9.766086408 |
| Tmem56   | 6.462626536 | 6.155074467 | 6.028636913 | 5.813557456 | 6.101966287 | 5.923581073 |
| Tmem63c  | 5.848873694 | 6.615488935 | 6.306963417 | 6.773989117 | 6.804748962 | 6.710417912 |
| Tmem74   | 6.449751263 | 6.735351769 | 6.587257783 | 6.249069934 | 6.822030152 | 6.605620608 |
| Tmem98   | 6.687667379 | 6.625071112 | 6.632847408 | 6.288107667 | 6.287574716 | 6.648457271 |
| Tmod2    | 11.73846935 | 11.88494984 | 11.80379936 | 11.76388216 | 11.97614172 | 12.00161916 |
| Tmpo     | 11.75459066 | 11.6070867  | 11.78814357 | 11.58782733 | 11.55117788 | 11.45143531 |

|          |             |             |             |             |             |             |
|----------|-------------|-------------|-------------|-------------|-------------|-------------|
| Tmsb4x   | 12.52153222 | 12.48954718 | 12.19524219 | 12.24789668 | 12.43647416 | 12.3020798  |
| Tmtc1    | 7.785433554 | 7.978769781 | 7.330732364 | 7.725628009 | 8.022319688 | 7.93150545  |
| Tmx2     | 8.841828521 | 8.714896838 | 8.917577052 | 8.645531514 | 8.724527918 | 8.594223824 |
| Tmx4     | 10.67577084 | 10.70804784 | 10.70073283 | 10.6448248  | 10.75188885 | 10.70479242 |
| Tnc      | 9.897942263 | 10.23553813 | 9.898348907 | 10.1187594  | 10.46406806 | 10.65707918 |
| Tnfrsf4  | 2.744494966 | 3.638623163 | 4.123905703 | 5.415520654 | 4.286420738 | 3.780271631 |
| Tnnt2    | 1           | 1           | 1           | 1           | 1           | 1.793876829 |
| Tnr      | 6.938675524 | 7.520823978 | 6.917057967 | 7.5993972   | 7.511962665 | 7.326295136 |
| Tnrc6a   | 10.67922218 | 10.65816747 | 10.95856313 | 10.69833524 | 10.6838074  | 10.732432   |
| Tnrc6b   | 11.3835408  | 11.39243288 | 11.68032217 | 11.42660999 | 11.48897412 | 11.46647635 |
| Tns1     | 8.193340801 | 8.012016409 | 8.504527138 | 7.943017297 | 8.432706266 | 7.869487519 |
| Tob1     | 7.754356793 | 7.299338803 | 7.748203182 | 7.317487909 | 7.506628612 | 7.804683367 |
| Tom1l2   | 8.829456528 | 8.919533599 | 9.015486045 | 9.026425344 | 9.003566843 | 9.10929611  |
| Tomm20   | 9.9852969   | 9.996243666 | 9.809324181 | 9.860027334 | 10.07560877 | 9.848769685 |
| Top1     | 11.1601997  | 11.02409631 | 11.34925559 | 11.03595176 | 11.04743145 | 11.03850369 |
| Top2a    | 12.09746532 | 11.94068891 | 12.14302617 | 11.86174601 | 11.76340445 | 11.5862999  |
| Top2b    | 12.79737389 | 12.78069029 | 12.76264071 | 12.70674448 | 12.78986073 | 12.69138338 |
| Topbp1   | 10.26981615 | 10.10809103 | 10.349508   | 10.06076309 | 10.11732682 | 9.986614869 |
| Tor1b    | 8.329596556 | 8.389071499 | 8.19829524  | 8.026186833 | 7.992102629 | 8.163328226 |
| Tor2a    | 7.168221945 | 7.225672326 | 6.860692416 | 6.841154966 | 6.999599076 | 6.730493894 |
| Tox2     | 5.726108215 | 5.537067746 | 5.498815825 | 5.702349231 | 5.473696519 | 6.149144468 |
| Tox3     | 8.846747763 | 8.845641708 | 9.139116812 | 8.909243823 | 8.856178116 | 8.876878777 |
| Tpi1     | 10.38842072 | 10.42298768 | 10.28136093 | 10.25183675 | 10.09439798 | 10.01553738 |
| Tpm1     | 8.993695519 | 9.105578363 | 9.024065988 | 8.940209624 | 8.872857602 | 9.143389375 |
| Tpm2     | 5.4177436   | 5.672612041 | 5.448709844 | 4.963790449 | 5.129560124 | 4.397591105 |
| Tpm4     | 10.58521862 | 10.56603238 | 10.57207212 | 10.34039419 | 10.19896394 | 10.25438434 |
| Tpr      | 11.46817453 | 11.56476925 | 11.62781192 | 11.45207873 | 11.44433664 | 11.44461535 |
| Tprgl    | 8.367742165 | 8.311078487 | 8.510645557 | 8.235392608 | 8.34576523  | 8.133482864 |
| Tprn     | 5.997828709 | 5.910600739 | 5.498815825 | 5.813557456 | 5.537856244 | 5.923581073 |
| Tpx2     | 9.923777661 | 9.727115879 | 10.03833302 | 9.699165843 | 9.494679304 | 9.719134247 |
| Tra2a    | 10.15750616 | 10.18217442 | 10.28314911 | 9.903099992 | 9.880126548 | 9.948555917 |
| Traf3ip3 | 1           | 2.397010683 | 2.72911076  | 3.509431521 | 3.234144523 | 2.67860439  |
| Traf6    | 8.437878486 | 8.40306312  | 8.356127376 | 8.327278922 | 8.46606685  | 8.228305017 |
| Traf7    | 9.436977892 | 9.489453037 | 9.563704083 | 9.161324684 | 9.428525016 | 9.427875497 |
| Trafd1   | 9.29122286  | 9.337458805 | 9.127219725 | 9.094074984 | 9.225967625 | 9.406197326 |
| Trank1   | 9.61619629  | 9.9559988   | 10.06560215 | 9.747235359 | 9.931784607 | 10.05984702 |
| Trappc2  | 5.943756695 | 6.244822593 | 6.062349611 | 6.344752403 | 6.336497133 | 5.923581073 |
| Trim27   | 9.188403653 | 9.002746075 | 9.223487509 | 8.722363213 | 8.893439387 | 8.474340572 |
| Trim28   | 11.86902174 | 11.74557722 | 11.82420823 | 11.66307608 | 11.49773825 | 11.54792554 |
| Trim59   | 8.953215246 | 8.810379461 | 8.822408023 | 8.660485057 | 8.802775977 | 8.474340572 |
| Trim66   | 4.581385593 | 4.597908067 | 4.738542537 | 4.224165625 | 4.428584041 | 5.217963548 |
| Trim67   | 9.942280642 | 9.912644191 | 10.18709348 | 10.03374068 | 10.24293286 | 10.36447003 |
| Trim9    | 8.925583285 | 9.062149756 | 8.83221245  | 9.035057071 | 9.005458979 | 9.302725401 |
| Trmt10a  | 6.100248163 | 5.926187346 | 6.062349611 | 5.941500387 | 5.76927757  | 5.273752905 |
| Trmt2b   | 6.525333738 | 6.128372165 | 6.189834702 | 5.227488897 | 5.6582022   | 5.737711018 |
| Trove2   | 10.86222146 | 10.8207454  | 10.71802203 | 10.73940692 | 10.82227901 | 10.82986205 |
| Trpm3    | 9.265737785 | 9.39879494  | 9.252984282 | 9.179606152 | 9.304912034 | 9.335864615 |



|         |             |             |             |             |             |             |
|---------|-------------|-------------|-------------|-------------|-------------|-------------|
| Trps1   | 9.332137864 | 9.404370252 | 9.421572173 | 9.245550003 | 9.332306694 | 9.158287114 |
| Trpv4   | 2.121272526 | 2.978340632 | 1           | 3.509431521 | 3.514815644 | 2.303023309 |
| Tsc22d1 | 11.73681415 | 11.75597199 | 11.70920664 | 11.6159083  | 11.59393255 | 11.65092819 |
| Tsc22d4 | 7.393360064 | 7.079996201 | 7.245252952 | 6.867169543 | 6.452002941 | 6.789098145 |
| Tsen34  | 8.688607335 | 8.692285755 | 8.725784132 | 8.42246087  | 8.482462248 | 7.93150545  |
| Tsen54  | 6.772836778 | 6.993865632 | 6.540180369 | 5.989661022 | 6.372130108 | 6.024597402 |
| Tsfm    | 6.585428507 | 6.474193269 | 6.362144593 | 6.146587985 | 5.968657436 | 5.923581073 |
| Tshz1   | 9.052362782 | 9.069186784 | 9.296128597 | 8.825477013 | 9.033547204 | 9.074377625 |
| Tsnax   | 9.454808132 | 9.494689396 | 9.437717247 | 9.391611263 | 9.61852881  | 9.421714901 |
| Tspyl4  | 10.59329048 | 10.75189435 | 10.56473982 | 10.56163913 | 10.59046044 | 10.75097807 |
| Tsr2    | 7.54027584  | 7.510521207 | 7.606858048 | 7.746801175 | 7.412795491 | 7.326295136 |
| Tsr3    | 7.08740126  | 7.219360232 | 7.37164492  | 6.659562717 | 6.787258259 | 6.750294335 |
| Tssc4   | 7.830828485 | 7.643759998 | 7.500202711 | 7.753790403 | 7.40708114  | 7.47649919  |
| Tssk6   | 4.80004717  | 4.673735516 | 3.280577348 | 3.370835508 | 3.427188559 | 2.303023309 |
| Tst     | 4.432277612 | 4.517872985 | 4.246285218 | 3.752118759 | 4.382735357 | 4.494694577 |
| Ttbk2   | 10.93216095 | 10.9488339  | 10.92345095 | 10.99155579 | 11.00503002 | 11.04553212 |
| Ttc23   | 7.393360064 | 6.821220741 | 7.074035358 | 6.978757094 | 6.984329822 | 7.286166751 |
| Ttc25   | 4.077947413 | 4.343109123 | 3.493254909 | 3.370835508 | 3.427188559 | 4.397591105 |
| Ttc3    | 13.48032766 | 13.55225333 | 13.48248411 | 13.49966065 | 13.54322947 | 13.56687595 |
| Ttk     | 8.008153623 | 7.685571983 | 7.72733891  | 7.652718685 | 7.787394226 | 7.299667279 |
| Ttl     | 8.875916092 | 8.780678523 | 8.627861424 | 8.771401388 | 8.684933763 | 8.684467147 |
| Ttll7   | 8.768547759 | 8.666997287 | 8.286517902 | 8.377918347 | 8.617253761 | 8.725057258 |
| Ttll8   | 1.476947654 | 1           | 1.825170741 | 2.358763209 | 2.594940123 | 3.780271631 |
| Ttr     | 11.02839298 | 11.34900346 | 10.71139684 | 10.55565249 | 10.76143769 | 10.7448225  |
| Ttyh1   | 10.08233569 | 9.921419968 | 10.18518211 | 9.963130057 | 9.742826074 | 10.00938832 |
| Ttyh3   | 10.21855395 | 10.02819207 | 10.7725043  | 10.33574377 | 10.0035961  | 10.38835987 |
| Tub     | 10.76876999 | 10.83474943 | 10.7506992  | 10.7046612  | 10.76143769 | 10.84029237 |
| Tuba1b  | 10.15651601 | 10.16585473 | 10.38491145 | 9.96162162  | 9.893470968 | 9.846471898 |
| Tubb2a  | 11.07943794 | 11.18052604 | 10.88275313 | 10.99081648 | 11.0326627  | 11.2730148  |
| Tubb2b  | 13.1878846  | 13.23910849 | 13.27079453 | 13.1983378  | 13.15438215 | 13.17682274 |
| Tubb4a  | 8.304786199 | 8.103970274 | 8.486014637 | 8.511749957 | 8.309466749 | 8.709969477 |
| Tubb4b  | 10.08233569 | 10.09608323 | 10.13259396 | 9.848647213 | 9.704902657 | 9.844170445 |
| Tufm    | 8.242694171 | 8.305129966 | 8.213378775 | 8.194881497 | 8.12683825  | 8.28370345  |
| Tuft1   | 4.48371173  | 4.814389099 | 2.346809092 | 4.863970092 | 3.749675008 | 4.397591105 |
| Txlnb   | 5.092852815 | 5.169039459 | 4.81963345  | 4.811344491 | 4.952570441 | 4.494694577 |
| Txndc5  | 8.786579996 | 8.664676202 | 8.757001731 | 8.855026845 | 8.509380534 | 8.555359192 |
| Txnrd1  | 10.40935334 | 10.28548833 | 10.4595534  | 10.18101028 | 10.3525396  | 10.1960223  |
| U2af2   | 10.56521228 | 10.54347082 | 10.67644663 | 10.3252252  | 10.22192985 | 10.28185321 |
| U2surp  | 10.86828181 | 10.94740245 | 10.8768443  | 10.93733306 | 10.95597316 | 10.85865097 |
| Uaca    | 8.760750124 | 8.60540119  | 9.0283369   | 8.298889428 | 8.36652511  | 8.63206889  |
| Uba52   | 10.32461821 | 10.46227364 | 10.2432879  | 10.0565299  | 10.14505566 | 10.16500964 |
| Ubp2l   | 10.16244672 | 10.0026902  | 10.40804011 | 10.15352749 | 10.03635479 | 10.22284352 |
| Ubash3b | 7.769978849 | 7.925480107 | 7.122782017 | 7.753790403 | 7.389801017 | 7.832813749 |
| Ube2c   | 8.391501811 | 8.296160943 | 8.655735526 | 8.142588557 | 7.905586346 | 7.842069961 |
| Ube2d1  | 8.138232202 | 8.231766236 | 8.435454165 | 8.230390494 | 8.062861048 | 8.199787102 |
| Ube2n   | 9.564878237 | 9.38052492  | 9.334575175 | 9.450870792 | 9.421456218 | 9.587737299 |
| Ube2s   | 9.211470278 | 9.226959068 | 9.320712856 | 8.855026845 | 8.881125584 | 8.78387832  |

|         |             |             |             |             |             |             |
|---------|-------------|-------------|-------------|-------------|-------------|-------------|
| Ube3a   | 11.38734398 | 11.39278351 | 11.25764166 | 11.33695586 | 11.38888213 | 11.35046055 |
| Ubqln2  | 10.15849563 | 9.970165567 | 10.30795364 | 10.08035539 | 10.07109885 | 10.20501822 |
| Ubqln4  | 9.548365278 | 9.440093886 | 9.607179872 | 9.310982162 | 9.258065604 | 9.180349186 |
| Ubr3    | 10.81468398 | 10.66805073 | 10.72066362 | 10.83230079 | 10.86198188 | 10.77050124 |
| Ubr7    | 9.330382872 | 9.201566139 | 9.178079794 | 8.924809803 | 8.883185197 | 8.903648757 |
| Ubxn7   | 11.39450053 | 11.26760511 | 11.47583195 | 11.22132919 | 11.42325948 | 11.2295925  |
| Uchl3   | 8.466923617 | 8.360674473 | 7.876927609 | 8.350517414 | 8.460560049 | 8.509621381 |
| Uggt2   | 9.587095578 | 9.629331842 | 9.466330737 | 9.457307408 | 9.611092024 | 9.534491441 |
| Ugt1a6a | 2.904029779 | 2.56572585  | 2.72911076  | 1.605542449 | 2.230948887 | 3.926671999 |
| Uhrf1   | 9.900310147 | 9.683071419 | 9.942014857 | 9.768096041 | 9.420038293 | 9.234071994 |
| Ulk2    | 10.46799589 | 10.44411835 | 10.42918971 | 10.50994289 | 10.53521171 | 10.55241761 |
| Unc13a  | 10.21189703 | 10.25572621 | 10.25244446 | 10.24192909 | 10.31945863 | 10.37087943 |
| Unc13c  | 7.05376114  | 7.600699962 | 6.587257783 | 6.905332463 | 7.55910193  | 7.612529102 |
| Unc45b  | 1           | 1           | 1           | 3.217496026 | 2.424393538 | 1           |
| Unc5d   | 8.895039088 | 9.187083725 | 8.861232178 | 9.074669371 | 9.439763542 | 9.415527885 |
| Unc79   | 10.30777086 | 10.39805402 | 10.48774124 | 10.36456595 | 10.41009568 | 10.53111472 |
| Unc80   | 8.158156364 | 8.107392546 | 7.618236209 | 8.345899565 | 8.265930954 | 8.270051993 |
| Ung     | 6.211215576 | 6.059370691 | 6.249587406 | 5.96578166  | 5.968657436 | 5.776850189 |
| Upf2    | 9.170858387 | 9.256543922 | 9.372023724 | 9.069076627 | 8.96324773  | 9.086111278 |
| Upf3b   | 8.268585917 | 8.465732417 | 8.376371725 | 8.317877694 | 8.443912394 | 8.486196965 |
| Urm1    | 7.426595337 | 7.546263538 | 7.475391307 | 7.147465445 | 7.137123938 | 6.769826698 |
| Use1    | 8.268585917 | 8.026550276 | 7.86742339  | 7.979250015 | 7.957334334 | 7.79518335  |
| Uso1    | 8.973597356 | 8.696836411 | 8.985047923 | 8.736545028 | 8.994068759 | 8.885857409 |
| Usp1    | 9.624813259 | 9.429195914 | 9.641041164 | 9.552567026 | 9.366570612 | 9.606869186 |
| Usp29   | 9.157063004 | 9.241048598 | 9.358518272 | 9.325128254 | 9.415776136 | 9.406197326 |
| Usp35   | 7.079064482 | 7.065993477 | 6.655113117 | 6.814662667 | 6.822030152 | 7.018684418 |
| Usp37   | 9.844840658 | 9.733774172 | 9.806840183 | 9.669905603 | 9.86144349  | 9.81626278  |
| Usp39   | 8.64691225  | 8.541057492 | 8.736265233 | 8.313154006 | 8.427070391 | 8.356561279 |
| Usp51   | 5.02503232  | 5.55722848  | 5.342954171 | 4.640865717 | 4.638225882 | 4.828538958 |
| Utp11l  | 7.214626703 | 7.16784392  | 7.344499199 | 6.801231826 | 6.847569902 | 6.934649122 |
| Uty     | 1           | 1           | 1           | 1.605542449 | 9.323232817 | 9.335864615 |
| Uvssa   | 8.264915424 | 8.331707257 | 8.307755651 | 8.289300747 | 8.47428784  | 8.343585151 |
| Vars    | 9.863163908 | 9.65411371  | 9.826593434 | 9.516036903 | 9.534536428 | 9.649669336 |
| Vasp    | 8.301206774 | 8.3918807   | 8.054939026 | 7.899562588 | 7.822162881 | 8.228305017 |
| Vat1l   | 9.094331856 | 9.237929461 | 9.045295227 | 9.046486289 | 9.086347782 | 9.25501321  |
| Vav3    | 8.538597609 | 8.481642877 | 7.86742339  | 8.331956663 | 8.541033209 | 8.199787102 |
| Vcpip1  | 9.822541079 | 9.756839142 | 9.748494973 | 9.722510428 | 9.882187587 | 9.880560254 |
| Vdac3   | 9.265737785 | 9.337458805 | 9.219757645 | 9.066272104 | 9.251702884 | 9.345659739 |
| Vegfa   | 8.873507796 | 8.913681354 | 9.07862533  | 8.871185604 | 8.767531156 | 8.840394804 |
| Vezf1   | 10.08546055 | 9.953148676 | 10.33406504 | 10.07617938 | 10.1014919  | 10.02369556 |
| Vhl     | 8.598153606 | 8.780678523 | 8.797601428 | 8.828790376 | 8.668309087 | 8.626722855 |
| Vim     | 12.00505315 | 11.92137563 | 11.8695456  | 11.79597744 | 11.67700642 | 11.66729389 |
| Vkorc1  | 5.768201518 | 5.616073469 | 6.127499866 | 5.057148905 | 4.952570441 | 4.671251885 |
| Vma21   | 7.926866847 | 8.268914386 | 8.01245271  | 8.0938474   | 8.375331561 | 8.290481041 |
| Vmn1r32 | 1           | 1.985596612 | 2.346809092 | 2.851100857 | 1.742960444 | 2.976330056 |
| Vmp1    | 8.343584661 | 8.090199423 | 7.828767736 | 8.163733725 | 8.091646168 | 7.706744944 |
| Vps26a  | 8.887897636 | 8.769921097 | 8.558680638 | 8.785111498 | 8.525293677 | 8.942894789 |

|         |             |             |             |             |             |             |
|---------|-------------|-------------|-------------|-------------|-------------|-------------|
| Vps28   | 8.89028205  | 8.801955689 | 9.011176862 | 8.906110372 | 8.80712165  | 8.885857409 |
| Vps37b  | 8.707660193 | 8.617452625 | 8.746670738 | 8.465669252 | 8.306400244 | 8.33049125  |
| Vstm2a  | 7.800724456 | 7.886173697 | 7.799080743 | 8.200008034 | 8.174708068 | 8.03198727  |
| Vstm2b  | 6.116632854 | 6.474193269 | 6.028636913 | 6.167675041 | 6.548598415 | 6.538882047 |
| Vsx2    | 4.75888608  | 3.782574642 | 3.280577348 | 4.579248421 | 4.335381646 | 3.617319577 |
| Vti1b   | 8.388131439 | 8.612644125 | 8.396335926 | 8.142588557 | 8.34874928  | 8.249329503 |
| Was     | 1.834785459 | 2.978340632 | 1           | 1           | 1.418787199 | 1.793876829 |
| Wasf1   | 8.068354845 | 7.71727479  | 8.479790635 | 8.490986459 | 8.294068628 | 8.290481041 |
| Wasl    | 8.953215246 | 8.98796917  | 9.216018112 | 9.171799586 | 8.953479544 | 8.881375078 |
| Wbp11   | 8.589375434 | 8.678547025 | 8.81748071  | 8.615151257 | 8.463316077 | 8.76453655  |
| Wbp5    | 9.812518428 | 9.650599399 | 9.779230151 | 9.709987225 | 9.801721165 | 9.668002394 |
| Wbscr16 | 6.6087826   | 6.690421389 | 6.466552201 | 6.703542969 | 6.658499563 | 6.344163211 |
| Wbscr17 | 7.400068652 | 7.726206233 | 7.799080743 | 7.560066561 | 7.813548956 | 7.97422651  |
| Wdr37   | 9.630529443 | 9.40714985  | 9.494387746 | 9.613389863 | 9.775349147 | 9.576689791 |
| Wdr48   | 9.654573683 | 9.790227356 | 9.601458241 | 9.615309828 | 9.603616704 | 9.620381134 |
| Wdr62   | 6.597152809 | 5.894843895 | 6.781940076 | 6.551407287 | 6.04423294  | 5.923581073 |
| Wdr7    | 10.4397867  | 10.49203379 | 10.23407285 | 10.39058323 | 10.52535482 | 10.48014947 |
| Wdr90   | 8.796783834 | 8.818754334 | 8.851623649 | 8.588033395 | 8.692000395 | 8.474340572 |
| Wdsub1  | 5.962006808 | 5.474837936 | 6.466552201 | 5.484368924 | 5.383455101 | 4.752037851 |
| Wfdc2   | 2.904029779 | 4.433135735 | 4.46371154  | 4.053408608 | 3.126983752 | 2.303023309 |
| Wfikkn1 | 5.74730838  | 5.495880869 | 5.639468694 | 5.101656215 | 4.638225882 | 5.697480352 |
| Whamm   | 6.342390651 | 6.681264926 | 6.917057967 | 7.093392124 | 7.073611394 | 6.863708404 |
| Whsc1   | 12.30673208 | 12.22923332 | 12.37031285 | 12.27335079 | 12.30283946 | 12.21124255 |
| Whsc111 | 10.45677831 | 10.29377295 | 10.62520307 | 10.34618621 | 10.51609389 | 10.4395652  |
| Wibg    | 7.795645475 | 7.959962914 | 7.848225027 | 7.5993972   | 7.24995982  | 7.464562498 |
| Wipf2   | 7.972590348 | 7.833420063 | 7.876927609 | 8.168971945 | 8.204663426 | 7.896393726 |
| Wiz     | 8.441134751 | 8.093654478 | 8.822408023 | 8.785111498 | 8.324702257 | 8.730051656 |
| Wnt9a   | 4.077947413 | 3.478699897 | 2.72911076  | 5.379823897 | 4.598664013 | 3.780271631 |
| Wrb     | 8.92790627  | 8.931167349 | 8.715226328 | 8.38693755  | 8.715308932 | 8.526943428 |
| Wsb2    | 9.46444163  | 9.506402174 | 9.54594017  | 9.476446726 | 9.453689693 | 9.559958272 |
| Xbp1    | 8.699525473 | 8.997222457 | 8.746670738 | 8.355120529 | 8.670695801 | 8.788673515 |
| Xiap    | 9.950301668 | 9.81973435  | 9.848497276 | 9.955572051 | 10.10590795 | 10.07954651 |
| Xkr4    | 8.750287281 | 8.657690457 | 8.44826137  | 8.67159937  | 8.951517946 | 8.658505892 |
| Xpo1    | 11.79968306 | 11.63876888 | 11.70854144 | 11.66909616 | 11.58288696 | 11.55708839 |
| Xylt1   | 6.882295587 | 7.590953988 | 7.737808763 | 6.583144971 | 7.095094417 | 7.546116814 |
| Ylpm1   | 10.44141359 | 10.54914437 | 10.90382679 | 10.56163913 | 10.46887597 | 10.685639   |
| Ythdc2  | 9.125026374 | 9.046189808 | 9.0283369   | 8.915490384 | 9.079178821 | 8.807696486 |
| Ythdf1  | 8.934852867 | 8.814572975 | 9.086838916 | 8.580190881 | 8.870783182 | 8.840394804 |
| Ythdf3  | 10.62155036 | 10.44411835 | 10.63643802 | 10.49124568 | 10.6814423  | 10.43192267 |
| Ywhab   | 10.53581546 | 10.54662555 | 10.68187901 | 10.68468546 | 10.71594042 | 10.7111208  |
| Ywhae   | 11.3168608  | 11.25839898 | 11.72770895 | 11.4547619  | 11.30609951 | 11.52008256 |
| Zbtb16  | 5.682749757 | 5.796508198 | 5.76761879  | 6.081411933 | 6.101966287 | 6.444805259 |
| Zbtb33  | 9.213375952 | 9.076189655 | 9.230918434 | 8.98247462  | 9.225967625 | 9.244580598 |
| Zbtb38  | 8.264915424 | 8.692285755 | 8.570443605 | 8.653027659 | 8.561755649 | 8.730051656 |
| Zbtb39  | 8.482810658 | 8.380610926 | 8.429007674 | 8.413661705 | 8.424244176 | 8.425915907 |
| Zbtb6   | 9.0963986   | 8.917585487 | 8.797601428 | 8.906110372 | 8.995973385 | 9.042613165 |
| Zc3h10  | 7.889215153 | 7.219360232 | 7.818939792 | 7.199585062 | 7.066378704 | 7.066852093 |

|          |             |             |             |             |             |             |
|----------|-------------|-------------|-------------|-------------|-------------|-------------|
| Zc3h12c  | 9.725727428 | 9.50380754  | 9.811803909 | 9.558566454 | 9.592330593 | 9.241086228 |
| Zc3h13   | 10.08546055 | 9.896909772 | 10.29205691 | 10.01350046 | 10.03264836 | 10.09704896 |
| Zc3h4    | 9.81879074  | 9.894930849 | 10.25609087 | 9.979619595 | 9.732581793 | 9.746502994 |
| Zc3h6    | 7.727938134 | 7.841662625 | 7.651841978 | 7.781413557 | 7.733617806 | 7.523282183 |
| Zc3hav1l | 8.674842432 | 8.705894885 | 8.851623649 | 8.890340207 | 8.687293155 | 8.63206889  |
| Zcchc11  | 10.87371444 | 10.88944455 | 11.0611321  | 10.8976537  | 10.89501857 | 10.90686253 |
| Zcchc12  | 9.47718704  | 9.46164593  | 9.154828502 | 9.420447609 | 9.412927687 | 9.461296417 |
| Zcchc5   | 3.047666507 | 2.205919617 | 1           | 3.635872179 | 2.007489679 | 1           |
| Zcchc7   | 8.185595857 | 8.546110182 | 8.314765989 | 8.230390494 | 8.246862924 | 8.206969603 |
| Zdbf2    | 11.26175756 | 11.08958283 | 11.3594616  | 11.21120905 | 11.23409673 | 11.18300259 |
| Zdhhc21  | 9.79226179  | 9.661116753 | 9.727634952 | 9.766369125 | 9.85201044  | 9.780601468 |
| Zeb2     | 10.8999834  | 11.04922583 | 11.28199083 | 11.11203228 | 11.16974575 | 11.28324453 |
| Zer1     | 8.64408926  | 8.791356331 | 8.409493545 | 8.697204558 | 8.941669744 | 8.779067133 |
| Zfand4   | 6.43676005  | 6.536450301 | 6.740890878 | 6.4517769   | 6.101966287 | 5.888273572 |
| Zfhx2os  | 5.868356087 | 5.941607358 | 6.655113117 | 6.167675041 | 5.921335734 | 6.627197922 |
| Zfhx3    | 11.68109888 | 11.50244919 | 11.81682018 | 11.77766357 | 11.56888001 | 11.79432315 |
| Zfhx4    | 11.54547222 | 11.46958502 | 11.57477875 | 11.50585161 | 11.49908186 | 11.51358022 |
| Zfp148   | 10.55096557 | 10.55228673 | 10.73118185 | 10.57551209 | 10.68085041 | 10.65707918 |
| Zfp207   | 11.51296094 | 11.46858743 | 11.62569942 | 11.38838578 | 11.41402954 | 11.36096254 |
| Zfp217   | 8.146234916 | 7.91380022  | 8.021050658 | 7.867702096 | 7.533103826 | 7.965782904 |
| Zfp280c  | 9.123000266 | 8.907805273 | 8.912964789 | 8.851773261 | 8.995973385 | 9.10929611  |
| Zfp280d  | 10.01181874 | 9.967343321 | 10.12064274 | 9.754222488 | 10.15275932 | 10.10283623 |
| Zfp281   | 9.524003912 | 9.49076391  | 9.589946453 | 9.427021088 | 9.368042046 | 9.464296639 |
| Zfp292   | 11.81262621 | 11.92283313 | 11.97121032 | 11.78578443 | 11.88298358 | 11.86072289 |
| Zfp316   | 9.456418189 | 9.34472636  | 9.372023724 | 9.121352176 | 9.070167232 | 9.093881028 |
| Zfp326   | 8.704953713 | 8.653014431 | 8.90369579  | 8.637996215 | 8.649071877 | 8.663735651 |
| Zfp334   | 9.839914898 | 9.825979519 | 9.838803268 | 9.871318391 | 9.76421692  | 9.595967765 |
| Zfp367   | 7.656896065 | 7.997334635 | 7.215596043 | 7.753790403 | 7.51727707  | 7.415802885 |
| Zfp395   | 5.307880412 | 5.387455657 | 5.76761879  | 5.379823897 | 5.383455101 | 5.613488471 |
| Zfp41    | 10.20807925 | 10.15183635 | 10.21171358 | 10.09693959 | 10.02613913 | 9.844170445 |
| Zfp423   | 9.475600008 | 9.40714985  | 9.693080644 | 9.497419019 | 9.432749729 | 9.505657507 |
| Zfp445   | 11.37292349 | 11.33629899 | 11.33983622 | 11.33404417 | 11.33384838 | 11.37298598 |
| Zfp455   | 4.80004717  | 4.433135735 | 4.46371154  | 5.673154141 | 5.599283728 | 5.327464956 |
| Zfp462   | 12.00862415 | 11.90278539 | 12.51352885 | 12.07765905 | 12.03660757 | 12.12476614 |
| Zfp503   | 7.433151493 | 7.299338803 | 7.330732364 | 7.014114022 | 6.60957971  | 7.066852093 |
| Zfp524   | 4.009405591 | 4.879886885 | 5.168191412 | 3.370835508 | 4.382735357 | 3.22300096  |
| Zfp580   | 5.46968923  | 5.341696146 | 6.189834702 | 5.267106973 | 4.855205563 | 5.036351157 |
| Zfp608   | 10.27347421 | 10.41541468 | 10.72724649 | 10.30870899 | 10.27935911 | 10.53540053 |
| Zfp609   | 9.799891399 | 9.614977273 | 10.22851544 | 9.957086823 | 9.749615404 | 10.0378623  |
| Zfp644   | 10.77329853 | 10.77950854 | 10.94394257 | 10.82899549 | 10.79955867 | 10.67013104 |
| Zfp651   | 8.177809111 | 8.079784332 | 8.220861814 | 8.104821966 | 7.864477522 | 8.095286392 |
| Zfp664   | 10.4822915  | 10.21744087 | 10.51994574 | 10.28839603 | 10.32173841 | 10.32705292 |
| Zfp704   | 10.95227011 | 11.12039746 | 11.15200586 | 11.09630918 | 11.19980325 | 11.25493636 |
| Zfp770   | 7.903449939 | 7.76572728  | 8.10432422  | 7.704139468 | 7.742720901 | 7.601670527 |
| Zfp788   | 8.975844362 | 9.074442122 | 8.841950696 | 9.023536586 | 9.111162273 | 9.147128257 |
| Zfp804a  | 7.599764006 | 7.397652741 | 7.200535793 | 7.391055685 | 7.760756566 | 7.230864661 |
| Zfp804b  | 3.511354355 | 3.974698911 | 3.678570668 | 5.186752068 | 5.262085683 | 4.752037851 |

|         |             |             |             |             |             |             |
|---------|-------------|-------------|-------------|-------------|-------------|-------------|
| Zfp871  | 11.24927283 | 11.15015292 | 11.22172887 | 11.160173   | 11.32554175 | 11.06740115 |
| Zfp874b | 6.195876154 | 6.181291514 | 5.847135518 | 5.673154141 | 6.143798956 | 4.970351389 |
| Zfp931  | 6.270992534 | 6.862311704 | 6.632847408 | 6.551407287 | 7.29397293  | 6.769826698 |
| Zfp94   | 6.823622422 | 6.870391298 | 6.362144593 | 6.146587985 | 6.116045717 | 6.444805259 |
| Zfp97   | 4.80004717  | 4.597908067 | 3.990174756 | 3.045898796 | 3.234144523 | 3.926671999 |
| Zfpm2   | 8.201044388 | 8.484277645 | 8.314765989 | 8.452842071 | 8.181418771 | 8.588735424 |
| Zglp1   | 2.744494966 | 2.853470894 | 2.346809092 | 4.756726338 | 2.747440291 | 3.617319577 |
| Zic1    | 10.3237364  | 10.18703455 | 10.52297567 | 10.38384122 | 10.10502582 | 10.36607505 |
| Zic2    | 8.82447787  | 8.787094687 | 9.032595206 | 8.47838339  | 8.556602877 | 8.621356935 |
| Zic3    | 8.169980108 | 8.012016409 | 8.09620986  | 7.979250015 | 7.980606047 | 8.178022524 |
| Zim1    | 6.772836778 | 6.66277579  | 7.006366839 | 6.583144971 | 6.872665379 | 7.082557119 |
| Zkscan2 | 9.32510505  | 9.15602381  | 8.944945201 | 9.391611263 | 9.344317098 | 9.230552046 |
| Zkscan3 | 9.143134433 | 9.21431847  | 9.174230508 | 8.91860355  | 9.079178821 | 9.086111278 |
| Zmiz1   | 10.72736049 | 10.51669517 | 11.24117754 | 10.9403995  | 10.60613205 | 10.95990626 |
| Zmiz2   | 9.220973577 | 8.899933082 | 9.563704083 | 9.212954822 | 8.830791647 | 9.326002533 |
| Zmym1   | 8.571657212 | 8.703635593 | 8.460955881 | 8.465669252 | 8.577104454 | 8.375809226 |
| Zmym2   | 11.43752537 | 11.37550155 | 11.43620142 | 11.32527366 | 11.39250157 | 11.31765874 |
| Zmym6   | 9.41396142  | 9.245714695 | 9.178079794 | 9.418249777 | 9.230828084 | 9.381016726 |
| Zmynd8  | 10.10817164 | 10.264183   | 10.5214615  | 10.13491039 | 10.13558386 | 10.26646638 |
| Znrf3   | 7.81082909  | 7.293341578 | 7.695465596 | 7.732720314 | 7.834988096 | 7.832813749 |
| Zranb2  | 10.28348632 | 10.27867444 | 10.1832682  | 10.32052554 | 10.31565098 | 10.01962223 |
| Zranb3  | 7.701026658 | 7.667138317 | 7.748203182 | 7.136811703 | 7.116262226 | 7.173357913 |
| Zrsr2   | 8.246421563 | 8.124383183 | 7.789047758 | 8.142588557 | 7.933681068 | 7.982620987 |

**LX, ABX + Veh or ABX + FLX dams [normalized gene counts, Wald, p <0.05]**

| ABX + Veh 1 | ABX + Veh 2 | ABX + Veh 3 | ABX + FLX 1 | ABX + FLX 2 | ABX + FLX 3 |
|-------------|-------------|-------------|-------------|-------------|-------------|
| 9.163986653 | 9.214274677 | 9.195835242 | 9.029025996 | 8.834527523 | 8.986115537 |
| 5.20937531  | 4.763989148 | 5.42209455  | 4.950067607 | 5.036273452 | 5.211906216 |
| 6.146276344 | 5.784988506 | 6.178827647 | 5.933284016 | 5.805443346 | 6.333687577 |
| 4.448385543 | 5.113905184 | 4.94017096  | 4.366797664 | 4.356767986 | 4.683201781 |
| 1           | 1           | 1.520899766 | 1.40189026  | 2.34524792  | 1.961732649 |
| 7.317331132 | 7.148102294 | 7.437384541 | 7.293119087 | 7.021049908 | 7.298421905 |
| 9.28493458  | 9.306372523 | 9.14355004  | 9.3883937   | 9.598891342 | 9.51695334  |
| 9.426182478 | 9.491524603 | 9.545606703 | 9.728159687 | 9.738140258 | 9.764946512 |
| 7.948285383 | 8.044194949 | 8.038424687 | 7.792638854 | 8.149519283 | 7.72403707  |
| 2.459379109 | 4.231169995 | 3.163111837 | 3.074635247 | 1           | 1.559564046 |
| 5.768104837 | 6.455613719 | 6.672644045 | 6.183334418 | 6.386451309 | 5.540381827 |
| 1.662934613 | 3.091832257 | 3.531904981 | 2.192163608 | 3.029091357 | 2.275883944 |
| 9.639559871 | 9.811902817 | 9.782009896 | 9.913530849 | 10.09387029 | 9.966967599 |
| 6.574828051 | 6.57327552  | 6.596894388 | 6.862459978 | 6.717395152 | 6.842602549 |
| 5.066011601 | 3.241540814 | 3.8253578   | 3.458731245 | 4.650252065 | 3.932350938 |
| 7.025981046 | 6.866256711 | 6.857118337 | 6.6481605   | 6.838875062 | 7.17139837  |
| 7.586132639 | 7.726267866 | 7.639679523 | 7.661439291 | 8.009899129 | 7.423148832 |
| 8.344953553 | 8.265753447 | 8.7390486   | 8.467918259 | 8.400371424 | 8.353337052 |
| 7.306739728 | 7.521911764 | 7.652208453 | 7.624339595 | 7.714243478 | 7.588543475 |
| 7.34864665  | 7.383782668 | 7.324498692 | 7.176219313 | 7.460279405 | 7.446850551 |
| 8.945849299 | 9.010310772 | 8.876205138 | 9.121790155 | 9.055320558 | 9.163477321 |
| 5.533899618 | 6.13040766  | 6.013872616 | 5.295120421 | 5.805443346 | 6.134028382 |
| 8.768102187 | 8.633997724 | 8.776726613 | 8.417302747 | 8.647642915 | 8.681013841 |
| 6.787821537 | 6.783214864 | 7.068180142 | 7.220397274 | 7.592842545 | 7.407128556 |
| 5.672346062 | 5.362985128 | 4.671400465 | 5.855376688 | 4.894007383 | 5.510702103 |
| 8.040664453 | 8.313038675 | 8.541065885 | 8.674853186 | 8.844232937 | 8.640477539 |
| 11.46352706 | 11.32093717 | 11.38134261 | 11.42985845 | 11.47247819 | 11.47370326 |
| 3.169860822 | 3.091832257 | 1.520899766 | 2.192163608 | 1           | 1.961732649 |
| 6.520865289 | 6.223342662 | 6.461074515 | 6.257900576 | 6.386451309 | 6.31663636  |
| 4.594870902 | 4.30106361  | 5.019679186 | 4.651288752 | 4.966893338 | 4.514011558 |
| 1           | 1           | 3.296794681 | 1.40189026  | 1.824050315 | 1.559564046 |
| 7.263578997 | 7.194751639 | 7.068180142 | 6.886161377 | 6.986408908 | 7.485508114 |
| 6.643775324 | 6.25890276  | 7.010960543 | 6.049795852 | 6.359633686 | 6.610469831 |
| 1.662934613 | 2.262061444 | 2.666415399 | 4.01207407  | 3.278533864 | 3.260203441 |
| 1           | 1           | 1           | 1           | 1           | 1           |
| 6.709577309 | 7.138588647 | 7.030287001 | 6.977255072 | 6.950915626 | 6.85446586  |
| 6.238324409 | 6.360608329 | 5.954412191 | 6.269962007 | 6.092794286 | 6.624394157 |
| 6.959920741 | 6.530269    | 5.934034702 | 5.649204005 | 6.513535519 | 6.246341787 |
| 1           | 2.735797961 | 1           | 2.549633394 | 1.824050315 | 1.559564046 |
| 10.47818163 | 10.43712592 | 10.3959897  | 10.18118499 | 10.35034785 | 10.23656445 |
| 8.647376322 | 8.532319243 | 8.635585202 | 8.339317249 | 8.53829468  | 8.306604004 |
| 7.751462309 | 7.770056484 | 7.74285995  | 8.143444059 | 8.240524304 | 8.087884767 |
| 7.419176413 | 7.558045101 | 7.451790029 | 7.491578933 | 7.557879992 | 7.567075519 |
| 6.169844777 | 6.889130728 | 6.107831707 | 6.13139265  | 5.591624257 | 5.352389568 |
| 10.45678534 | 10.69414195 | 10.56122011 | 10.42248624 | 10.62685616 | 10.63590399 |

|             |             |             |             |             |             |
|-------------|-------------|-------------|-------------|-------------|-------------|
| 8.197953754 | 8.118667951 | 7.828150566 | 7.741581685 | 7.485305515 | 7.853813016 |
| 7.995214197 | 8.08933844  | 7.892928988 | 7.950851876 | 7.826216865 | 8.208335571 |
| 4.727844166 | 4.157717108 | 4.069091575 | 4.01207407  | 4.736161969 | 3.109951065 |
| 5.969546468 | 5.709890283 | 6.125910909 | 6.351681315 | 5.920008939 | 6.191277754 |
| 7.274490835 | 7.439081653 | 6.475246535 | 6.351681315 | 6.607711868 | 6.31663636  |
| 6.999918773 | 6.642221239 | 6.709077783 | 6.233470919 | 6.217515958 | 6.718273747 |
| 5.066011601 | 4.99241264  | 4.766663576 | 4.791763656 | 3.987925368 | 5.385472394 |
| 6.406478774 | 6.695099597 | 6.107831707 | 5.855376688 | 5.805443346 | 6.114429039 |
| 4.448385543 | 4.157717108 | 3.734015431 | 4.979745824 | 5.036273452 | 5.385472394 |
| 8.435240961 | 8.274466839 | 8.076107449 | 8.597998442 | 8.805013275 | 8.530161518 |
| 5.497107678 | 5.989339017 | 6.489280693 | 6.763557417 | 6.332308105 | 6.818579195 |
| 9.022285614 | 8.981331836 | 8.770993659 | 8.259901079 | 8.312208637 | 8.573870698 |
| 10.37676652 | 10.33253303 | 10.22726307 | 10.12502015 | 10.16723022 | 10.06594668 |
| 9.3940231   | 9.426557082 | 9.603203708 | 9.317528032 | 9.537403314 | 9.351014046 |
| 9.057458321 | 8.79102105  | 8.768118616 | 9.161178531 | 9.051136382 | 8.996859708 |
| 6.876435835 | 6.966449082 | 6.684891142 | 6.170523241 | 6.059853167 | 6.866232415 |
| 8.270602683 | 7.876907723 | 7.555476699 | 8.126960192 | 8.489652678 | 8.127533928 |
| 8.802434218 | 8.844665071 | 8.77958457  | 8.373257063 | 8.452063741 | 8.462009787 |
| 10.80981965 | 10.88616329 | 10.85000186 | 10.93446775 | 11.03332917 | 10.93512423 |
| 1           | 1.552010398 | 2.453859607 | 3.371863457 | 3.676399415 | 3.396272977 |
| 10.28261996 | 10.1598864  | 10.26446131 | 10.27991609 | 10.25534131 | 10.18816707 |
| 9.101018033 | 9.412810393 | 9.096192533 | 8.723905439 | 8.901133016 | 9.177711972 |
| 5.736886172 | 4.949529988 | 4.569399469 | 3.074635247 | 4.650252065 | 4.452898434 |
| 8.583000681 | 8.725806246 | 8.267415423 | 8.016754369 | 8.367097167 | 8.189726526 |
| 8.721017063 | 7.770056484 | 1.520899766 | 1.715872115 | 1.824050315 | 2.275883944 |
| 9.440786889 | 9.388935543 | 9.598355935 | 9.07099252  | 9.22464282  | 9.246851741 |
| 6.047952674 | 4.99241264  | 5.871116192 | 5.318536384 | 6.125000019 | 6.20986693  |
| 8.875923097 | 9.103722474 | 8.75074699  | 8.40641675  | 8.393777685 | 8.817575141 |
| 3.89069954  | 1.950285237 | 2.453859607 | 1           | 1           | 1.559564046 |
| 5.20937531  | 5.575326786 | 5.300017035 | 6.007198926 | 6.438635846 | 5.706677567 |
| 9.221504881 | 9.34824457  | 9.123444012 | 9.3883937   | 9.497982806 | 9.355195104 |
| 3.345708554 | 2.262061444 | 2.204484772 | 3.618193167 | 4.356767986 | 3.635072154 |
| 8.151357495 | 8.243736912 | 8.547787053 | 8.31914392  | 8.157326174 | 8.450331464 |
| 6.282235843 | 5.189564533 | 4.277538014 | 4.5361587   | 3.029091357 | 3.741118641 |
| 8.798659646 | 8.784935586 | 8.84653009  | 8.333582167 | 8.33303732  | 8.5264586   |
| 11.0026154  | 10.8974889  | 11.03776982 | 10.82017854 | 10.7635546  | 10.85176269 |
| 7.125762598 | 7.266388411 | 6.295237616 | 5.855376688 | 6.464036922 | 6.367197082 |
| 4.727844166 | 4.30106361  | 3.911259693 | 5.092705987 | 4.558900638 | 4.881751715 |
| 7.98860282  | 8.198669494 | 7.252268475 | 7.345351577 | 7.328190834 | 7.042509934 |
| 9.198772023 | 9.304246677 | 9.210734859 | 9.04666064  | 8.882414569 | 8.967118524 |
| 8.139469421 | 7.719902426 | 6.910242852 | 7.33964048  | 7.151850774 | 6.842602549 |
| 7.457983205 | 7.222033967 | 6.013872616 | 6.196032832 | 5.765139818 | 4.881751715 |
| 7.207746394 | 6.911647729 | 6.475246535 | 5.685677723 | 6.464036922 | 6.20986693  |
| 6.557063793 | 5.902068469 | 4.898710929 | 4.950067607 | 3.84055471  | 4.834616782 |
| 7.759251653 | 7.367585666 | 6.813163712 | 7.013576248 | 6.67451722  | 6.281917164 |
| 7.252583998 | 6.392976945 | 5.934034702 | 5.871298359 | 5.446254265 | 6.246341787 |
| 7.327845346 | 7.090055974 | 7.114188451 | 7.610177499 | 7.341957365 | 7.341206929 |

|             |             |             |             |             |             |
|-------------|-------------|-------------|-------------|-------------|-------------|
| 7.379296842 | 7.593295521 | 7.581912571 | 6.666525816 | 6.819325541 | 6.705230636 |
| 4.662889011 | 5.329928717 | 3.8253578   | 4.068407991 | 4.558900638 | 3.932350938 |
| 7.358935903 | 7.507201167 | 7.535326966 | 7.090402967 | 6.537662192 | 7.254329153 |
| 9.650071903 | 9.370766493 | 9.385991047 | 9.057138878 | 9.246764932 | 9.214998379 |
| 6.741386012 | 6.408892928 | 6.262924938 | 5.871298359 | 5.591624257 | 5.924911051 |
| 9.670868935 | 9.426557082 | 9.819985163 | 9.363281196 | 9.644041139 | 9.528106666 |
| 8.259661286 | 7.351204755 | 7.268635048 | 7.049005417 | 7.197997286 | 6.76929803  |
| 9.711584654 | 9.68693572  | 9.713422253 | 9.40762785  | 9.618818461 | 9.610866049 |
| 9.904803115 | 10.03725383 | 10.26853586 | 10.32179776 | 10.27700114 | 10.23656445 |
| 6.757031177 | 6.13040766  | 4.719818172 | 5.065284254 | 4.736161969 | 4.881751715 |
| 6.193034368 | 6.530269    | 6.3268424   | 6.720259364 | 6.738365512 | 6.299381202 |
| 11.49768623 | 11.66206868 | 11.81619788 | 11.93159643 | 11.66958513 | 11.70505654 |
| 5.768104837 | 5.113905184 | 5.736396015 | 5.271318122 | 6.092794286 | 5.831967395 |
| 8.626235348 | 8.800101385 | 8.587469487 | 8.403682368 | 8.353569567 | 8.533854956 |
| 3.999927798 | 4.36772701  | 2.851638739 | 3.180662487 | 3.84055471  | 4.101176152 |
| 8.248636274 | 8.137894855 | 8.230294254 | 7.455067975 | 7.930121997 | 8.175610506 |
| 8.395809079 | 8.403199233 | 8.429037078 | 8.156496876 | 8.240524304 | 8.378203825 |
| 9.128341793 | 9.130366008 | 9.174279547 | 9.440015574 | 9.175515156 | 9.392289165 |
| 10.2758481  | 10.31680177 | 10.29474358 | 10.07089518 | 9.9905957   | 10.11485159 |
| 8.533896501 | 8.716244453 | 8.835586013 | 8.798660701 | 8.814918598 | 8.67767898  |
| 7.389370557 | 7.415641146 | 7.588446538 | 6.947525041 | 7.151850774 | 7.083408146 |
| 10.11972337 | 10.16692312 | 9.985074476 | 9.937360055 | 9.984026019 | 10.07611451 |
| 5.99615815  | 5.902068469 | 5.892395377 | 5.789872457 | 5.844651476 | 6.299381202 |
| 10.28531983 | 10.17159527 | 10.20511275 | 10.42922432 | 10.34352092 | 10.40936864 |
| 10.68144884 | 10.63362865 | 10.66300726 | 10.41299976 | 10.50059642 | 10.7242202  |
| 9.332700252 | 9.29785028  | 9.169929489 | 9.205812389 | 8.991246829 | 9.226455483 |
| 2.115432786 | 4.080322903 | 3.531904981 | 4.411037997 | 4.817242336 | 4.38908158  |
| 8.344953553 | 8.640752791 | 8.544430383 | 8.855795477 | 9.415755361 | 9.01282741  |
| 6.986708928 | 7.119371049 | 6.813163712 | 6.729023555 | 6.932836069 | 7.245346553 |
| 5.339771562 | 5.362985128 | 5.534643218 | 5.451571397 | 5.036273452 | 5.211906216 |
| 7.137763686 | 6.60125042  | 6.824278552 | 6.838362687 | 6.488998496 | 6.830640875 |
| 6.539078069 | 5.784988506 | 5.267812428 | 5.222502    | 4.966893338 | 5.174538761 |
| 7.93459191  | 7.830392401 | 7.645957589 | 7.491578933 | 7.497657635 | 7.052843694 |
| 10.51660255 | 10.40276613 | 9.992483696 | 10.00477016 | 10.07750603 | 9.951862295 |
| 10.14223746 | 9.963734518 | 9.943629294 | 10.0665799  | 9.905084043 | 9.854800436 |
| 12.7302815  | 12.83085298 | 12.79175754 | 12.79648726 | 12.96244146 | 12.89739461 |
| 1           | 1           | 1           | 1.973584608 | 3.491138785 | 1           |
| 8.583000681 | 8.375118279 | 8.418074287 | 8.833618743 | 8.400371424 | 8.369962432 |
| 6.862039628 | 6.966449082 | 7.235714099 | 6.67562154  | 6.412779514 | 6.567871871 |
| 8.034258568 | 7.853837522 | 7.633374018 | 7.345351577 | 7.369102495 | 7.431092749 |
| 8.454559971 | 8.074447014 | 8.11283095  | 7.796813165 | 8.027043853 | 8.015763452 |
| 10.34088038 | 10.43615548 | 10.38289375 | 10.12667927 | 9.950721232 | 10.19284693 |
| 6.592376231 | 6.854682249 | 6.767827725 | 6.893976097 | 7.182778534 | 7.103430536 |
| 9.39652251  | 9.29785028  | 9.435756818 | 9.570086127 | 9.454289623 | 9.432416185 |
| 10.21767342 | 10.08261165 | 10.06455539 | 10.26492779 | 10.30186668 | 10.16810654 |
| 7.101456712 | 6.071630228 | 6.295237616 | 6.118109656 | 5.544776471 | 5.597970034 |
| 6.832808945 | 6.13040766  | 5.16664667  | 5.871298359 | 4.966893338 | 4.514011558 |



|             |             |             |             |             |             |
|-------------|-------------|-------------|-------------|-------------|-------------|
| 5.828585816 | 6.205228431 | 6.279171741 | 6.429018845 | 6.513535519 | 6.053980935 |
| 6.193034368 | 6.168303034 | 6.461074515 | 6.035736161 | 5.882822178 | 5.569463256 |
| 10.39812687 | 10.08137078 | 10.04330939 | 10.11000161 | 10.07338579 | 9.915517296 |
| 8.449754417 | 8.488055137 | 8.489633528 | 8.016754369 | 8.495823376 | 8.189726526 |
| 9.495439669 | 9.808907016 | 9.606426529 | 9.42930025  | 9.555240353 | 9.562867213 |
| 4.594870902 | 3.911841602 | 4.069091575 | 4.122624619 | 3.84055471  | 3.839901004 |
| 11.86152144 | 11.96426105 | 11.99773997 | 11.99723104 | 12.10708421 | 12.06838986 |
| 10.88650328 | 11.01263277 | 11.00089651 | 11.03772086 | 11.13863003 | 11.06842503 |
| 10.33176761 | 10.42739205 | 10.35058545 | 10.14152607 | 10.45381729 | 10.38196736 |
| 7.586132639 | 7.399799845 | 7.355475681 | 6.999157322 | 6.986408908 | 7.021617672 |
| 11.11918294 | 11.08809262 | 11.11955875 | 11.17233102 | 11.13566923 | 11.17869639 |
| 4.790000379 | 5.426908942 | 5.16664667  | 5.341578351 | 5.805443346 | 5.831967395 |
| 5.254163095 | 5.034057356 | 4.671400465 | 5.408575174 | 4.558900638 | 5.248330196 |
| 7.379296842 | 7.572248791 | 6.981476577 | 7.71535912  | 7.626977818 | 7.651094694 |
| 9.476663919 | 9.580289771 | 9.54224495  | 9.474300732 | 9.666096992 | 9.461795584 |
| 8.501755124 | 8.55752638  | 8.782436876 | 8.863775966 | 8.520245571 | 8.660888057 |
| 10.2317388  | 10.47163388 | 10.26853586 | 10.37581329 | 10.59702968 | 10.612517   |
| 6.918782085 | 6.695099597 | 7.26047497  | 7.083585342 | 7.447601649 | 7.743306648 |
| 9.735473701 | 9.672174807 | 9.799011317 | 10.08717653 | 10.27520853 | 10.06467065 |
| 8.040664453 | 7.732605344 | 7.430127496 | 7.638364019 | 7.497657635 | 7.415160931 |
| 8.939007238 | 8.940852955 | 8.255147521 | 8.072909337 | 8.035540411 | 8.112792892 |
| 5.672346062 | 6.031071278 | 6.161403507 | 6.257900576 | 5.956261216 | 5.569463256 |
| 8.430370514 | 7.770056484 | 7.210520828 | 7.176219313 | 7.038063404 | 6.978902989 |
| 9.257698433 | 8.821069185 | 7.887640503 | 8.055594557 | 8.009899129 | 7.61667935  |
| 4.523486615 | 3.091832257 | 1.902806559 | 1           | 2.34524792  | 1           |
| 10.19344299 | 10.14926655 | 10.09470202 | 9.433327829 | 9.891106545 | 10.09997972 |
| 9.918780891 | 9.845914687 | 9.908811034 | 9.768039113 | 9.857955908 | 9.718641441 |
| 7.820097176 | 7.593295521 | 7.828150566 | 7.322370277 | 7.42190694  | 7.374544233 |
| 12.68499477 | 12.74097843 | 12.7619007  | 12.75176377 | 12.86271278 | 12.84725554 |
| 2.736907833 | 1.552010398 | 3.531904981 | 3.618193167 | 2.34524792  | 3.520607779 |
| 3.502432386 | 4.431445628 | 4.069091575 | 4.366797664 | 4.736161969 | 3.741118641 |
| 6.574828051 | 6.293607403 | 5.16664667  | 5.119616214 | 4.966893338 | 4.178715345 |
| 7.338283488 | 6.889130728 | 6.3268424   | 6.362986612 | 6.630325787 | 5.855770664 |
| 6.787821537 | 6.500868827 | 6.417703508 | 6.091171049 | 6.217515958 | 6.246341787 |
| 9.116261742 | 8.904828412 | 8.97426262  | 8.581155944 | 8.680520271 | 8.73975956  |
| 8.956051931 | 8.935368931 | 8.597221865 | 8.521870231 | 8.367097167 | 8.736557913 |
| 8.478350527 | 8.949040101 | 9.178616529 | 9.500130413 | 9.491821357 | 9.297702013 |
| 9.994978112 | 10.05632652 | 9.965128485 | 9.871600793 | 9.869883056 | 9.884032106 |
| 7.93459191  | 7.876907723 | 8.429037078 | 8.631104798 | 8.077288436 | 8.217550848 |
| 11.03586216 | 11.17907109 | 11.37095769 | 11.43287902 | 11.31736868 | 11.33187208 |
| 5.942434672 | 5.329928717 | 5.331518423 | 4.687710463 | 4.558900638 | 4.971638961 |
| 6.725569324 | 6.530269    | 6.910242852 | 6.601197586 | 6.464036922 | 6.509044524 |
| 8.040664453 | 7.674540158 | 7.167529026 | 7.299016964 | 6.858163212 | 7.042509934 |
| 10.05316476 | 10.14333267 | 10.23039982 | 10.25434256 | 10.37063692 | 10.20448059 |
| 9.403994863 | 9.247845698 | 9.54224495  | 9.503965287 | 9.816649794 | 9.674151507 |
| 7.856862399 | 7.882618087 | 7.508015266 | 7.995119647 | 7.581282249 | 7.72403707  |
| 6.366241698 | 6.682060594 | 6.824278552 | 6.53277027  | 6.276053451 | 6.744011451 |

|             |             |             |             |             |             |
|-------------|-------------|-------------|-------------|-------------|-------------|
| 7.448378929 | 7.529211193 | 6.981476577 | 6.909479681 | 6.513535519 | 6.889481478 |
| 6.464805401 | 6.530269    | 6.089523066 | 6.780519224 | 5.920008939 | 6.399945895 |
| 11.08084609 | 11.11562994 | 11.34514594 | 11.27539369 | 11.42960616 | 11.42530927 |
| 10.95847028 | 11.00414494 | 11.13302992 | 11.14680391 | 11.0976302  | 11.15010495 |
| 9.060613724 | 8.970648033 | 8.936347966 | 9.088124568 | 9.389481904 | 9.132145139 |
| 10.23313782 | 10.1924347  | 10.20829798 | 10.373719   | 10.44905486 | 10.39522555 |
| 9.104079688 | 9.165922874 | 9.266805223 | 9.426608938 | 9.228353476 | 9.26696366  |
| 7.486418266 | 7.687646999 | 7.713271195 | 7.137245015 | 6.968771416 | 7.470169165 |
| 9.301032829 | 9.685303057 | 9.573869679 | 9.271776496 | 9.386163822 | 9.430436121 |
| 7.975288473 | 7.770056484 | 7.355475681 | 6.657372381 | 7.382485901 | 7.470169165 |
| 10.84775793 | 10.98237194 | 11.02638542 | 11.08584965 | 11.0044057  | 11.11478347 |
| 6.303700321 | 6.500868827 | 6.417703508 | 7.020732029 | 6.838875062 | 6.794149027 |
| 8.529348484 | 8.616970371 | 8.727254575 | 8.752125824 | 8.464702518 | 8.704144484 |
| 8.843315515 | 8.561091714 | 8.672954772 | 8.444163702 | 8.291074833 | 8.203705765 |
| 9.731519562 | 9.777069709 | 9.878473478 | 9.817157308 | 9.928083087 | 9.851844427 |
| 9.210183228 | 9.319062232 | 9.197973203 | 8.83158567  | 9.239428521 | 9.105091224 |
| 5.828585816 | 5.735359855 | 6.143766352 | 5.592703924 | 5.340507563 | 5.136177653 |
| 8.344953553 | 8.329856171 | 8.486138622 | 8.444163702 | 8.853873496 | 8.555819197 |
| 9.146274305 | 9.074084389 | 8.944011029 | 9.048412306 | 8.7441092   | 9.046829489 |
| 8.203673875 | 8.291737315 | 8.520712437 | 8.093416445 | 8.027043853 | 8.142125867 |
| 8.313556889 | 8.194084344 | 8.052671314 | 8.322043152 | 8.596877893 | 8.469743145 |
| 7.467523966 | 7.334635711 | 7.9498577   | 8.045105055 | 7.920979301 | 8.374089013 |
| 7.612172519 | 8.08439169  | 8.004625024 | 8.059074177 | 8.180496531 | 7.774861468 |
| 10.09838843 | 10.25430714 | 10.48184673 | 10.587592   | 10.40383057 | 10.4352721  |
| 10.96606248 | 11.07193925 | 11.16179296 | 11.04651214 | 11.19281129 | 11.10302202 |
| 8.959436837 | 8.918790663 | 8.679089998 | 8.638101247 | 8.393777685 | 8.507800089 |
| 9.5139742   | 9.532055239 | 9.441181853 | 9.826375098 | 9.857955908 | 9.586177179 |
| 9.184379908 | 9.120734285 | 9.266805223 | 9.493716218 | 9.537403314 | 9.424479572 |
| 9.854786045 | 10.01662781 | 10.01205758 | 10.10916265 | 10.03364527 | 10.12345657 |
| 10.26631377 | 10.2565078  | 10.41357473 | 10.45388509 | 10.47739645 | 10.49048362 |
| 7.495773425 | 7.138588647 | 7.176230489 | 7.304890828 | 7.902518233 | 7.73691201  |
| 8.276042421 | 8.152148722 | 8.14864282  | 8.113636136 | 9.063652681 | 8.61280642  |
| 4.369159279 | 3.819597725 | 1.902806559 | 1.973584608 | 1.824050315 | 1.559564046 |
| 7.448378929 | 7.099894    | 7.193477533 | 7.041988846 | 6.092794286 | 6.596409802 |
| 9.934345693 | 10.02697768 | 9.9600986   | 10.09990169 | 10.42014532 | 10.18464718 |
| 4.285328166 | 3.998540311 | 3.163111837 | 2.835884957 | 2.727313987 | 1.961732649 |
| 8.511011674 | 8.358823157 | 8.38842626  | 8.045105055 | 8.043987222 | 8.217550848 |
| 7.113660841 | 7.439081653 | 6.86790089  | 6.6481605   | 6.537662192 | 6.794149027 |
| 9.403994863 | 9.135157862 | 9.248356177 | 9.199520045 | 9.205945018 | 9.203449559 |
| 12.48490819 | 12.48566986 | 12.51118062 | 12.33901415 | 12.19124455 | 12.28713462 |
| 8.492438798 | 8.371061721 | 8.574362913 | 8.059074177 | 8.060733912 | 7.588543475 |
| 8.609096644 | 8.338191971 | 8.506982177 | 7.619634326 | 8.452063741 | 8.031524424 |
| 7.968584936 | 7.938512008 | 7.87165773  | 7.103942318 | 7.714243478 | 7.671356603 |
| 9.856602551 | 9.841523565 | 9.866426405 | 9.40762785  | 9.671558669 | 9.64371058  |
| 8.659913784 | 8.754117167 | 8.770993659 | 8.590804292 | 8.814918598 | 8.736557913 |
| 8.883070219 | 9.172930284 | 8.941461195 | 8.607535176 | 8.520245571 | 8.838631905 |
| 8.875923097 | 8.864999567 | 8.928643982 | 8.628765089 | 8.658685492 | 8.73975956  |

|             |             |             |             |             |             |
|-------------|-------------|-------------|-------------|-------------|-------------|
| 5.569776566 | 6.440207626 | 6.178827647 | 5.553769232 | 5.844651476 | 5.831967395 |
| 10.30141381 | 10.13258981 | 10.28471995 | 10.14644125 | 10.10400449 | 10.08621118 |
| 10.77854232 | 10.69170447 | 10.90338428 | 10.45322409 | 10.56216969 | 10.56998034 |
| 12.35439649 | 12.40017177 | 12.33393742 | 12.43420055 | 12.61631193 | 12.48969191 |
| 9.543594017 | 9.618433516 | 9.69688774  | 9.593070772 | 10.0588716  | 9.820435073 |
| 8.478350527 | 8.391231403 | 8.414401433 | 8.699587777 | 8.602607472 | 8.577454052 |
| 7.379296842 | 7.572248791 | 7.167529026 | 7.293119087 | 7.408885913 | 6.756710141 |
| 3.89069954  | 4.30106361  | 4.277538014 | 5.008825805 | 4.356767986 | 5.211906216 |
| 10.85867567 | 10.83333117 | 10.9529641  | 10.88680066 | 11.19091088 | 11.1751533  |
| 5.969546468 | 7.008839041 | 3.8253578   | 4.174877361 | 4.736161969 | 4.881751715 |
| 10.59486418 | 10.52555026 | 10.53777883 | 10.45123929 | 10.57388353 | 10.51217712 |
| 5.163152438 | 6.720829303 | 6.709077783 | 6.924818429 | 6.464036922 | 6.705230636 |
| 3.772519063 | 3.377164271 | 2.204484772 | 2.192163608 | 1           | 1           |
| 9.193032394 | 9.400922355 | 9.353752814 | 9.725972315 | 9.72243867  | 9.568279961 |
| 9.361130475 | 9.29571183  | 9.154600154 | 8.89526366  | 9.063652681 | 9.180070819 |
| 10.54278825 | 10.64206971 | 10.4659666  | 10.45916217 | 10.57534109 | 10.50278522 |
| 5.969546468 | 5.809176966 | 5.534643218 | 4.857183992 | 5.284577982 | 4.57264077  |
| 2.969564903 | 4.080322903 | 4.211346654 | 5.119616214 | 2.727313987 | 4.628980122 |
| 8.334563733 | 8.203240119 | 8.135317326 | 8.504109481 | 8.419973731 | 8.500268589 |
| 6.787821537 | 7.029575919 | 6.732865614 | 6.67562154  | 6.717395152 | 6.478706163 |
| 9.476663919 | 9.470824135 | 9.543926806 | 9.628632831 | 9.806756392 | 9.642000436 |
| 5.736886172 | 5.546839624 | 4.459634417 | 4.613923687 | 4.356767986 | 4.252298811 |
| 1.662934613 | 1           | 1.520899766 | 2.192163608 | 1           | 2.533710429 |
| 5.066011601 | 2.924770305 | 1           | 2.192163608 | 1           | 1.961732649 |
| 9.784007177 | 9.834175198 | 10.18800507 | 10.11167808 | 10.32976937 | 10.22747021 |
| 5.163152438 | 5.29609709  | 5.664004394 | 6.077510738 | 6.217515958 | 5.969229824 |
| 9.717594103 | 9.645554384 | 9.855632785 | 9.871600793 | 9.801784132 | 9.961493043 |
| 11.05259881 | 11.11623595 | 11.15630596 | 11.25657458 | 11.3398397  | 11.09241672 |
| 8.36551138  | 7.806559973 | 8.255147521 | 7.688651093 | 7.874375994 | 7.60268     |
| 4.849588934 | 5.575326786 | 5.782714705 | 5.222502    | 6.304454951 | 5.597970034 |
| 6.999918773 | 6.758583409 | 7.039854002 | 6.522724513 | 6.359633686 | 6.509044524 |
| 4.594870902 | 3.377164271 | 4.401452511 | 4.453961963 | 3.278533864 | 4.57264077  |
| 8.48306192  | 8.596268672 | 8.547787053 | 8.241643224 | 8.101769409 | 8.170874306 |
| 2.969564903 | 3.72105059  | 3.531904981 | 2.699847117 | 1.824050315 | 1.961732649 |
| 5.736886172 | 6.071630228 | 5.201162845 | 4.651288752 | 4.894007383 | 5.352389568 |
| 6.073168917 | 5.630667188 | 5.664004394 | 6.340286727 | 5.284577982 | 6.299381202 |
| 7.064212394 | 7.514575215 | 7.542074861 | 7.470828805 | 7.671270362 | 7.530570068 |
| 10.33568013 | 10.46213084 | 10.61421239 | 10.70440707 | 10.80265791 | 10.90049693 |
| 10.76409806 | 10.74361577 | 10.90861547 | 10.87203956 | 11.12177127 | 11.04337996 |
| 6.146276344 | 5.989339017 | 6.143766352 | 6.610713265 | 6.561392014 | 5.924911051 |
| 9.113225859 | 9.172930284 | 9.139106187 | 9.264259411 | 9.598891342 | 9.264742798 |
| 11.68108273 | 11.76265135 | 11.61689163 | 11.76528878 | 11.89409148 | 11.82333103 |
| 7.906808767 | 7.738915105 | 7.882332562 | 8.159741711 | 8.464702518 | 8.062539036 |
| 9.131346067 | 8.918790663 | 8.966758984 | 8.569004057 | 8.89180415  | 8.823622785 |
| 7.196315822 | 6.615037045 | 6.721020726 | 6.305552825 | 6.914527064 | 6.31663636  |
| 8.511011674 | 8.709834534 | 8.399615791 | 8.146718351 | 8.165091048 | 8.332282228 |
| 10.00484032 | 10.01792561 | 9.948716826 | 10.0011569  | 10.2091444  | 10.1561746  |

|             |             |             |             |             |             |
|-------------|-------------|-------------|-------------|-------------|-------------|
| 8.520209212 | 8.564648259 | 8.234466311 | 8.690642369 | 8.779948283 | 8.670986043 |
| 9.504736698 | 9.519282216 | 9.441181853 | 9.529273867 | 9.257700068 | 9.269181108 |
| 7.878480057 | 7.719902426 | 7.562131219 | 7.470828805 | 6.968771416 | 7.341206929 |
| 7.98860282  | 7.782327225 | 7.627040832 | 7.188980231 | 6.561392014 | 7.382759567 |
| 9.67705003  | 9.667220749 | 9.604816018 | 9.756297783 | 9.766490045 | 9.960121152 |
| 9.99167567  | 9.880570652 | 9.899645212 | 10.02359271 | 9.994958924 | 10.16215291 |
| 11.40266317 | 11.38921837 | 11.32962928 | 11.43187286 | 11.62101192 | 11.51072046 |
| 7.173179341 | 7.439081653 | 7.437384541 | 7.661439291 | 7.615688897 | 7.423148832 |
| 6.406478774 | 5.989339017 | 6.732865614 | 5.963305922 | 5.844651476 | 6.012227628 |
| 11.50928019 | 11.52548395 | 11.60928119 | 11.6580891  | 11.74015972 | 11.68110818 |
| 8.8359682   | 8.709834534 | 8.944011029 | 9.113447121 | 8.910401945 | 9.092624253 |
| 9.246658354 | 9.101275757 | 9.242153692 | 9.458577993 | 9.528401408 | 9.398379832 |
| 10.16879863 | 10.13378742 | 10.49842159 | 10.39521477 | 10.59271797 | 10.32980768 |
| 9.536812451 | 9.256667588 | 9.404623563 | 9.570086127 | 9.872256699 | 9.772782066 |
| 10.3382826  | 10.412667   | 10.3515461  | 10.41231976 | 10.36052805 | 10.42436965 |
| 8.44009502  | 8.346479883 | 7.87165773  | 7.741581685 | 8.291074833 | 8.010471298 |
| 8.139469421 | 7.971037608 | 7.929415319 | 8.020328823 | 7.902518233 | 8.185036516 |
| 9.469559534 | 9.632057679 | 9.382235491 | 9.241470258 | 9.389481904 | 9.586177179 |
| 8.928682918 | 9.267619628 | 9.118937696 | 9.344868618 | 9.525388248 | 9.275813078 |
| 4.101465124 | 4.080322903 | 4.141971765 | 4.274026533 | 5.036273452 | 4.514011558 |
| 10.47818163 | 10.4885832  | 10.31851992 | 9.812010749 | 10.37566492 | 10.17285182 |
| 9.723578623 | 9.517448232 | 9.843392647 | 9.347716663 | 9.610311948 | 9.55198041  |
| 8.775802444 | 8.829962928 | 9.161189824 | 9.156313393 | 8.973668744 | 8.93953852  |
| 8.529348484 | 8.885051431 | 8.926066818 | 9.222976146 | 8.92419463  | 8.986115537 |
| 9.330087688 | 9.362617325 | 9.370909809 | 9.29851824  | 9.190810315 | 9.299872751 |
| 10.16733577 | 10.2265118  | 10.35058545 | 10.05268361 | 10.04841418 | 10.16095923 |
| 6.097951976 | 6.344147548 | 6.178827647 | 6.763557417 | 6.464036922 | 6.806415822 |
| 8.969544164 | 9.258864657 | 9.202239643 | 9.567645252 | 9.513272276 | 9.473381844 |
| 7.703821849 | 7.836289497 | 7.620679723 | 7.195318611 | 7.395746293 | 7.142660476 |
| 9.605397214 | 9.706384907 | 9.504739229 | 9.62041308  | 9.806756392 | 9.866564273 |
| 7.620749071 | 7.194751639 | 7.252268475 | 6.69364274  | 6.412779514 | 6.957061838 |
| 8.621969722 | 8.683906214 | 8.73610912  | 8.889411828 | 8.964798728 | 8.752495566 |
| 10.39312928 | 10.55624426 | 10.4641913  | 10.61680927 | 10.73905343 | 10.67823688 |
| 10.23033842 | 10.31469125 | 10.10042792 | 10.02892578 | 10.37063692 | 10.40029258 |
| 10.58831992 | 10.57488118 | 10.46862545 | 10.30797186 | 10.20350003 | 10.29866786 |
| 8.721017063 | 8.766523646 | 8.75945895  | 8.49386144  | 8.647642915 | 8.552181633 |
| 10.52918545 | 10.68027483 | 10.61820922 | 10.19152629 | 10.51433941 | 10.61338998 |
| 10.12726717 | 10.16809258 | 10.09928455 | 9.844635854 | 9.950721232 | 9.929604707 |
| 8.768102187 | 8.763432014 | 8.541065885 | 8.732647575 | 8.910401945 | 8.88274452  |
| 10.57072203 | 10.58892088 | 10.43639111 | 10.38068818 | 10.48361968 | 10.52707814 |
| 9.166917683 | 9.269800094 | 8.790960115 | 8.916519563 | 9.279324784 | 9.072450268 |
| 10.87310532 | 10.99494801 | 10.96870183 | 10.76638353 | 10.74554156 | 10.68073778 |
| 7.038837728 | 6.783214864 | 6.835308414 | 6.385334855 | 6.488998496 | 6.553388384 |
| 4.448385543 | 4.157717108 | 1.902806559 | 2.699847117 | 1.824050315 | 1.559564046 |
| 12.28998438 | 12.31695044 | 12.16990294 | 12.00919785 | 12.19788353 | 12.11289866 |
| 11.87592279 | 11.81584926 | 11.67943528 | 11.45252544 | 11.77862877 | 11.83796976 |
| 11.44553597 | 11.52274392 | 11.235977   | 11.30023248 | 11.14845569 | 11.31372547 |

|             |             |             |             |             |             |
|-------------|-------------|-------------|-------------|-------------|-------------|
| 9.210183228 | 8.935368931 | 8.886846499 | 8.488709991 | 8.882414569 | 9.036452405 |
| 6.973377009 | 7.099894    | 6.92063698  | 6.522724513 | 6.895982713 | 6.665378497 |
| 8.425483569 | 8.633997724 | 8.418074287 | 8.133576357 | 8.432895514 | 8.27605675  |
| 9.038379587 | 8.97332641  | 8.944011029 | 8.712902742 | 8.707357082 | 8.690972418 |
| 7.955083687 | 7.492339025 | 7.78897485  | 7.156863771 | 6.895982713 | 7.374544233 |
| 11.04146264 | 11.11623595 | 11.17052898 | 10.97877413 | 11.17945554 | 11.18223081 |
| 11.29425111 | 11.44383059 | 11.28305952 | 11.43086601 | 11.48027952 | 11.43768403 |
| 10.4068312  | 10.444866   | 10.38852086 | 10.50325471 | 10.62685616 | 10.59406133 |
| 9.507051625 | 9.436296565 | 9.25453211  | 9.167639964 | 9.084274859 | 9.107571742 |
| 8.097072351 | 6.642221239 | 6.107831707 | 5.685677723 | 6.125000019 | 5.855770664 |
| 9.878224074 | 10.01142489 | 9.743007942 | 9.730343748 | 9.758813369 | 9.802174995 |
| 4.849588934 | 3.615275167 | 4.515560603 | 3.892344006 | 2.34524792  | 2.275883944 |
| 12.65216497 | 12.69344444 | 12.65254192 | 12.70519304 | 12.81168481 | 12.81327778 |
| 8.893724949 | 8.938113549 | 9.073083023 | 9.051909271 | 9.335454471 | 9.127263831 |
| 7.389370557 | 6.998357746 | 6.824278552 | 6.450374626 | 6.412779514 | 7.011056979 |
| 3.772519063 | 2.51828802  | 3.911259693 | 3.074635247 | 2.34524792  | 3.260203441 |
| 9.845669048 | 9.854657037 | 9.689308948 | 9.765911421 | 9.92122179  | 9.981916384 |
| 9.737446714 | 9.60813029  | 9.614452227 | 9.885386682 | 9.909713277 | 9.707238101 |
| 4.285328166 | 4.99241264  | 4.898710929 | 4.919766022 | 4.650252065 | 4.927395279 |
| 5.459352853 | 5.946363531 | 6.143766352 | 5.855376688 | 6.438635846 | 6.228219627 |
| 8.700935485 | 8.650826455 | 8.926066818 | 8.980306841 | 8.933317037 | 8.911420975 |
| 12.69391257 | 12.78432943 | 12.7991702  | 12.86381397 | 12.91372678 | 12.80623243 |
| 8.254159312 | 8.265753447 | 8.130848002 | 7.796813165 | 7.682134238 | 8.057416015 |
| 10.36149591 | 10.32311487 | 10.46951065 | 10.64718153 | 10.71412896 | 10.62382473 |
| 6.366241698 | 6.60125042  | 5.994323509 | 6.021538103 | 4.894007383 | 5.385472394 |
| 6.832808945 | 6.587330775 | 6.516945969 | 6.245737457 | 5.956261216 | 5.783149234 |
| 6.832808945 | 6.733524099 | 6.5440907   | 6.878304096 | 7.615688897 | 6.934884941 |
| 8.292239643 | 8.510356944 | 8.038424687 | 8.207558297 | 8.133777608 | 8.180331209 |
| 6.34569435  | 6.544747421 | 6.756267574 | 6.969879803 | 6.819325541 | 6.665378497 |
| 5.969546468 | 6.168303034 | 6.530582176 | 5.573367918 | 5.636998506 | 5.758106376 |
| 2.115432786 | 2.262061444 | 3.531904981 | 4.122624619 | 4.121627621 | 4.178715345 |
| 5.497107678 | 5.395301053 | 5.759741239 | 5.222502    | 5.544776471 | 5.540381827 |
| 6.626844947 | 6.276359434 | 6.372988141 | 6.183334418 | 5.591624257 | 5.510702103 |
| 7.317331132 | 7.222033967 | 7.466053097 | 7.251144716 | 6.877196886 | 6.731199993 |
| 7.671164481 | 8.175596612 | 8.200747066 | 7.72415304  | 7.509904895 | 7.431092749 |
| 6.973377009 | 6.966449082 | 6.446761896 | 6.91716944  | 6.464036922 | 7.032101622 |
| 7.81263035  | 7.85963975  | 8.089988537 | 8.32493657  | 8.373813697 | 8.244848679 |
| 7.399374419 | 7.415641146 | 6.813163712 | 7.501843143 | 7.714243478 | 7.961947493 |
| 8.449754417 | 8.419003455 | 8.130848002 | 8.526904828 | 8.602607472 | 8.643899408 |
| 8.454559971 | 8.539566335 | 8.242774405 | 7.862010013 | 8.203300636 | 7.883064498 |
| 6.832808945 | 6.866256711 | 7.132188663 | 6.737734827 | 7.257315961 | 7.438993164 |
| 7.399374419 | 6.933818687 | 6.63526632  | 6.711441605 | 7.227961475 | 7.17139837  |
| 6.973377009 | 6.25890276  | 6.178827647 | 5.6117842   | 5.991624824 | 5.449445606 |
| 7.263578997 | 7.248809929 | 6.801962577 | 6.763557417 | 6.968771416 | 6.900967005 |
| 11.69027933 | 11.69205193 | 11.61689163 | 11.6695162  | 11.82347723 | 11.84095431 |
| 7.338283488 | 7.65465389  | 7.308757152 | 6.502420681 | 7.328190834 | 7.523156808 |
| 7.711871977 | 7.529211193 | 7.882332562 | 7.850007921 | 7.930121997 | 7.999828393 |

|             |             |             |             |             |             |
|-------------|-------------|-------------|-------------|-------------|-------------|
| 9.626843486 | 9.665565609 | 9.923097837 | 9.975607479 | 9.997135598 | 9.943555888 |
| 9.890688588 | 9.866231701 | 9.94490286  | 10.26718599 | 9.884066683 | 10.04668668 |
| 11.68364323 | 11.94289817 | 12.25860979 | 12.42899929 | 12.3668989  | 12.38188246 |
| 7.820097176 | 7.266388411 | 7.141105244 | 7.156863771 | 7.213057172 | 6.889481478 |
| 7.541660341 | 7.579298539 | 7.620679723 | 7.862010013 | 8.060733912 | 7.877261457 |
| 1.662934613 | 1.552010398 | 1.520899766 | 2.835884957 | 2.34524792  | 3.520607779 |
| 10.35251284 | 10.43129349 | 10.26241971 | 10.18038643 | 10.22222934 | 10.32661731 |
| 7.629274937 | 7.876907723 | 7.777583578 | 7.614913661 | 7.271772222 | 7.72403707  |
| 5.297602228 | 5.225956494 | 4.621301235 | 4.495645642 | 3.676399415 | 3.635072154 |
| 6.483735105 | 6.440207626 | 5.934034702 | 5.065284254 | 5.591624257 | 5.90223044  |
| 6.847498316 | 6.455613719 | 5.954412191 | 5.918035487 | 5.723677922 | 5.248330196 |
| 7.523480337 | 7.514575215 | 7.76032623  | 8.229341677 | 8.018496959 | 7.749673067 |
| 9.672932244 | 9.828269435 | 9.701415979 | 9.728159687 | 9.587379607 | 9.65901133  |
| 8.115395296 | 8.118667951 | 8.447125283 | 8.381618711 | 8.172814352 | 8.414718351 |
| 6.464805401 | 6.911647729 | 6.899773294 | 7.384708481 | 7.509904895 | 7.011056979 |
| 9.30635924  | 9.342040714 | 9.189402283 | 9.079583975 | 9.092441894 | 9.198804021 |
| 7.486418266 | 7.454499711 | 7.370718271 | 8.072909337 | 8.157326174 | 8.062539036 |
| 4.849588934 | 3.615275167 | 4.141971765 | 2.192163608 | 3.029091357 | 3.260203441 |
| 7.274490835 | 7.521911764 | 7.514891816 | 7.581429295 | 7.497657635 | 7.62362841  |
| 7.968584936 | 7.543700181 | 7.934553134 | 8.048610037 | 8.172814352 | 8.414718351 |
| 8.36551138  | 8.317261464 | 8.741982103 | 8.83158567  | 8.702029509 | 8.657506294 |
| 8.556423977 | 8.517714921 | 8.77958457  | 8.80281765  | 8.669644189 | 8.563066924 |
| 8.904301568 | 8.910429538 | 9.05903752  | 9.222976146 | 9.124655407 | 9.095126281 |
| 6.520865289 | 5.968011289 | 6.372988141 | 6.69364274  | 6.464036922 | 6.38366441  |
| 7.856862399 | 8.128313433 | 7.984949345 | 8.185440959 | 7.911778296 | 8.156571694 |
| 4.448385543 | 1           | 1.520899766 | 1           | 1.824050315 | 1           |
| 6.146276344 | 5.457839158 | 4.671400465 | 4.453961963 | 5.036273452 | 3.396272977 |
| 8.459349571 | 8.660830267 | 8.513863641 | 8.295737896 | 8.57955135  | 8.465881647 |
| 5.339771562 | 5.26145301  | 3.163111837 | 3.761770816 | 3.029091357 | 3.109951065 |
| 9.628970683 | 9.567938539 | 9.620840793 | 9.501409837 | 9.717166601 | 9.600336797 |
| 8.529348484 | 8.760333743 | 8.841068429 | 8.89526366  | 8.905774924 | 8.67767898  |
| 8.565337387 | 8.24816718  | 8.503529096 | 8.853793438 | 8.795039474 | 8.733349146 |
| 10.22190745 | 10.22875524 | 10.27158424 | 10.31162312 | 10.42500398 | 10.36961995 |
| 10.06891978 | 10.06137027 | 10.00596922 | 9.945843123 | 10.182613   | 10.02454325 |
| 7.78999516  | 7.719902426 | 7.903448152 | 7.924387501 | 7.369102495 | 7.793468303 |
| 8.292239643 | 8.415068601 | 8.255147521 | 7.552096566 | 8.312208637 | 8.302279511 |
| 11.25001854 | 11.25917417 | 11.41067426 | 11.25278112 | 11.25779608 | 11.11847778 |
| 11.12823416 | 11.2145939  | 11.22291281 | 11.09985399 | 11.14551501 | 11.18516956 |
| 5.768104837 | 6.010356039 | 5.934034702 | 6.077510738 | 6.18733174  | 5.758106376 |
| 9.666733443 | 9.811902817 | 9.991251466 | 9.9829536   | 9.845929333 | 9.926798208 |
| 8.911309814 | 9.012916584 | 8.926066818 | 8.76069912  | 8.824756375 | 8.891407465 |
| 4.448385543 | 3.377164271 | 3.419133915 | 3.074635247 | 3.491138785 | 3.932350938 |
| 9.073166772 | 9.366697663 | 9.378470134 | 9.318980001 | 9.60175498  | 9.586177179 |
| 10.83767689 | 10.61144794 | 10.37913012 | 10.45123929 | 10.50366175 | 10.36961995 |
| 8.464123323 | 8.166263138 | 8.117356351 | 7.780042959 | 8.035540411 | 7.871434979 |
| 10.53146151 | 10.81179408 | 10.99905853 | 11.02754421 | 10.89892958 | 10.87305898 |
| 5.704976993 | 5.709890283 | 5.267812428 | 5.222502    | 7.021049908 | 6.624394157 |

|             |             |             |             |             |             |
|-------------|-------------|-------------|-------------|-------------|-------------|
| 10.30007948 | 10.4602227  | 10.41541338 | 10.2482588  | 10.29480587 | 10.24109017 |
| 6.772508497 | 7.070176343 | 7.202024348 | 7.287197001 | 6.968771416 | 7.083408146 |
| 10.27856066 | 10.22763395 | 10.17937455 | 9.801662225 | 10.07132125 | 10.1086736  |
| 7.532598976 | 6.854682249 | 7.068180142 | 7.299016964 | 7.003833377 | 6.978902989 |
| 1           | 1           | 2.666415399 | 1.715872115 | 1           | 4.322310646 |
| 11.51791493 | 11.51862408 | 11.67176401 | 11.73841273 | 11.92471699 | 11.81841826 |
| 10.94145431 | 10.97169586 | 10.98488898 | 11.00787351 | 11.27762975 | 11.2550804  |
| 9.330087688 | 9.161232287 | 9.444787242 | 9.29851824  | 9.714523324 | 9.609116502 |
| 7.532598976 | 6.695099597 | 6.660292091 | 6.144554461 | 6.059853167 | 6.794149027 |
| 7.409309391 | 7.687646999 | 7.944774196 | 8.136873096 | 7.939207119 | 7.530570068 |
| 9.778268635 | 9.876283911 | 10.07854754 | 10.33907478 | 10.10602282 | 10.14776314 |
| 10.71887849 | 10.91918244 | 10.90272904 | 11.2142876  | 11.11477175 | 11.12461402 |
| 8.215046526 | 8.338191971 | 8.350488328 | 8.295737896 | 8.367097167 | 8.43065503  |
| 7.051580847 | 7.283755284 | 7.095960814 | 7.156863771 | 7.472846725 | 7.272128289 |
| 5.79866224  | 5.426908942 | 5.805328069 | 6.170523241 | 6.217515958 | 6.246341787 |
| 7.603544677 | 7.818525399 | 7.924259142 | 8.172648558 | 8.393777685 | 8.231264327 |
| 9.497769549 | 9.287126191 | 9.336389323 | 9.536780669 | 9.67971261  | 9.53365116  |
| 7.327845346 | 7.536473876 | 7.828150566 | 7.771584182 | 7.89319835  | 7.72403707  |
| 7.941454893 | 8.069448851 | 7.777583578 | 8.009578783 | 7.874375994 | 7.730488902 |
| 9.766722616 | 9.786238    | 9.771999082 | 9.904855062 | 9.727691543 | 10.02060005 |
| 7.296069994 | 7.634489671 | 7.805894868 | 7.980514129 | 7.89319835  | 7.697937279 |
| 8.380739763 | 8.261376937 | 8.373370591 | 8.602774689 | 8.57955135  | 8.581028527 |
| 6.539078069 | 6.344147548 | 5.934034702 | 5.318536384 | 5.991624824 | 5.540381827 |
| 7.995214197 | 8.24816718  | 7.87165773  | 8.103561713 | 8.149519283 | 7.883064498 |
| 8.265142357 | 8.113820919 | 8.263337702 | 8.283890926 | 8.077288436 | 8.235806672 |
| 4.285328166 | 3.091832257 | 2.453859607 | 3.691767369 | 2.727313987 | 4.019231643 |
| 8.014868463 | 8.08933844  | 8.076107449 | 8.194961367 | 8.157326174 | 8.092900914 |
| 7.759251653 | 7.60715801  | 7.114188451 | 7.460340739 | 7.369102495 | 7.493116862 |
| 8.157264997 | 8.118667951 | 8.447125283 | 8.602774689 | 8.298153888 | 8.434611845 |
| 5.380743228 | 5.426908942 | 4.211346654 | 3.828534121 | 3.676399415 | 4.252298811 |
| 9.639559871 | 9.498979008 | 9.595115014 | 8.939356136 | 9.264944382 | 9.321402362 |
| 9.978389782 | 10.0321249  | 10.01448575 | 10.17878798 | 10.18452437 | 10.23429626 |
| 10.72883011 | 10.80954764 | 10.81072461 | 10.93067382 | 10.96157626 | 10.90192668 |
| 12.38209119 | 12.4091016  | 12.4586519  | 12.54861951 | 12.47197039 | 12.51046028 |
| 10.05632956 | 9.942022005 | 10.01448575 | 9.71939023  | 9.997135598 | 9.92820214  |
| 11.46947457 | 11.49831154 | 11.49307754 | 11.54507428 | 11.62734943 | 11.51912968 |
| 11.16681289 | 11.27716961 | 11.40189085 | 11.54724393 | 11.45516531 | 11.45239497 |
| 6.741386012 | 7.30941979  | 7.276749231 | 7.557026958 | 7.472846725 | 7.60268     |
| 8.169007924 | 7.927505121 | 8.38842626  | 8.420011459 | 8.413469178 | 8.690972418 |
| 11.75208908 | 11.68226301 | 11.61208971 | 11.44888278 | 11.72710533 | 11.64953912 |
| 7.74363068  | 8.049281218 | 7.898198157 | 8.268944084 | 8.195739248 | 8.208335571 |
| 7.703821849 | 7.707086664 | 7.167529026 | 7.238924263 | 6.968771416 | 7.407128556 |
| 8.103205892 | 8.079427921 | 7.822618746 | 7.656853669 | 7.592842545 | 7.691337881 |
| 8.609096644 | 8.637379212 | 8.342779539 | 8.169432655 | 8.353569567 | 8.584594168 |
| 8.355269084 | 8.291737315 | 8.200747066 | 7.920566934 | 7.902518233 | 7.530570068 |
| 4.523486615 | 4.36772701  | 4.211346654 | 3.761770816 | 4.24398311  | 4.252298811 |
| 7.646176987 | 7.713508775 | 7.844619889 | 8.052106523 | 7.874375994 | 8.127533928 |

|             |             |             |             |             |             |
|-------------|-------------|-------------|-------------|-------------|-------------|
| 9.64377388  | 9.44210885  | 9.71789897  | 9.450651897 | 9.345739935 | 9.473381844 |
| 1           | 1.950285237 | 1.520899766 | 1           | 1           | 1           |
| 5.768104837 | 5.329928717 | 5.639043496 | 5.092705987 | 4.121627621 | 4.57264077  |
| 8.444932803 | 8.354720455 | 8.527528875 | 8.059074177 | 8.203300636 | 8.194401339 |
| 6.146276344 | 5.968011289 | 6.161403507 | 5.341578351 | 5.340507563 | 5.540381827 |
| 9.366239948 | 9.069084967 | 9.417524607 | 9.196363552 | 9.575775276 | 9.390253215 |
| 8.053391518 | 8.291737315 | 8.14421465  | 8.347877349 | 8.630918936 | 8.462009787 |
| 7.089148463 | 7.30941979  | 7.658432351 | 7.693136908 | 7.735259366 | 8.036740049 |
| 7.834915884 | 8.069448851 | 8.365783424 | 8.516818003 | 8.269626834 | 8.357511393 |
| 11.49768623 | 11.60966498 | 11.83761093 | 11.61766109 | 11.55088008 | 11.57576497 |
| 11.54520382 | 11.60492301 | 11.77669174 | 11.80053523 | 11.73495213 | 11.7478228  |
| 11.5830003  | 11.67158286 | 11.61289114 | 11.56142101 | 11.63225942 | 11.60019084 |
| 7.467523966 | 7.499789234 | 6.991371668 | 6.797283927 | 6.738365512 | 6.431967789 |
| 4.523486615 | 3.377164271 | 3.015764765 | 2.192163608 | 1.824050315 | 1.961732649 |
| 3.643786876 | 1.552010398 | 1.520899766 | 1           | 1           | 1           |
| 5.254163095 | 4.231169995 | 1           | 1.715872115 | 1.824050315 | 1.559564046 |
| 5.254163095 | 2.262061444 | 3.531904981 | 3.180662487 | 3.491138785 | 3.396272977 |
| 4.523486615 | 3.72105059  | 1.902806559 | 1.715872115 | 1           | 2.275883944 |
| 5.20937531  | 4.99241264  | 4.459634417 | 5.008825805 | 5.036273452 | 5.680258918 |
| 4.196323698 | 3.998540311 | 3.419133915 | 4.453961963 | 4.356767986 | 3.635072154 |
| 2.736907833 | 3.241540814 | 2.851638739 | 1.973584608 | 2.34524792  | 1.559564046 |
| 1.662934613 | 2.735797961 | 2.666415399 | 1           | 1           | 1           |
| 9.968344452 | 10.19473172 | 10.24701493 | 10.27244141 | 10.28948748 | 10.21717019 |
| 8.846975188 | 8.553952214 | 9.006334815 | 8.867749717 | 9.510227317 | 9.402426038 |
| 7.687585568 | 6.515643804 | 6.779295982 | 6.620166592 | 5.844651476 | 6.447716088 |
| 9.353432174 | 9.238969531 | 9.080054827 | 9.149800917 | 9.246764932 | 9.180070819 |
| 9.559294793 | 9.630361678 | 9.450178487 | 9.632141296 | 9.794293461 | 9.788326648 |
| 7.961850105 | 8.317261464 | 8.510427012 | 8.373257063 | 8.432895514 | 8.544878875 |
| 8.318837345 | 8.054349618 | 7.833661257 | 7.481241175 | 7.957207506 | 7.877261457 |
| 10.15262499 | 9.99438466  | 9.980113772 | 9.815100887 | 9.776662482 | 9.873868257 |
| 2.459379109 | 4.607277728 | 1.520899766 | 1           | 1           | 1.961732649 |
| 8.001795415 | 7.694156036 | 6.889227203 | 7.006384799 | 6.304454951 | 6.596409802 |
| 8.090912621 | 8.099181344 | 8.135317326 | 8.210690418 | 8.514178671 | 8.398603659 |
| 10.97862802 | 10.84653909 | 10.97057888 | 11.07041555 | 11.23215235 | 11.08362403 |
| 5.380743228 | 5.225956494 | 6.372988141 | 6.610713265 | 6.513535519 | 6.399945895 |
| 7.842268546 | 8.018491097 | 7.975009955 | 7.532204757 | 7.569628571 | 7.500685692 |
| 8.972897598 | 8.896385738 | 8.593978392 | 8.465298096 | 8.514178671 | 8.697573484 |
| 11.57198611 | 11.72619639 | 11.77203534 | 11.48166442 | 11.60896457 | 11.60414872 |
| 7.389370557 | 6.66890267  | 7.001199353 | 6.328801425 | 7.182778534 | 6.509044524 |
| 8.44009502  | 8.358823157 | 8.580931084 | 8.229341677 | 8.149519283 | 8.344951959 |
| 6.741386012 | 7.050018949 | 7.132188663 | 6.822071272 | 6.932836069 | 6.85446586  |
| 7.064212394 | 7.039833643 | 6.609798764 | 6.772063248 | 6.950915626 | 6.957061838 |
| 9.867453817 | 9.761658546 | 9.787699327 | 9.857681899 | 9.916629395 | 9.873868257 |
| 8.487757977 | 8.713043054 | 8.928643982 | 8.732647575 | 8.858669725 | 8.730133225 |
| 7.219087112 | 7.446811278 | 7.149967054 | 7.069852672 | 6.914527064 | 7.390928385 |
| 8.897259111 | 8.870757166 | 8.857391771 | 8.723905439 | 8.702029509 | 8.802344182 |
| 8.992856144 | 8.582300645 | 8.873532488 | 8.514285238 | 8.520245571 | 8.500268589 |



|             |             |             |             |             |             |
|-------------|-------------|-------------|-------------|-------------|-------------|
| 7.961850105 | 7.751452436 | 7.970014462 | 7.486419313 | 7.151850774 | 7.595629052 |
| 10.81823345 | 9.971793197 | 8.496598042 | 8.708478061 | 8.043987222 | 8.566677179 |
| 9.207338877 | 8.170937423 | 6.756267574 | 6.797283927 | 6.584737829 | 6.968023745 |
| 11.29022445 | 10.06639645 | 8.117356351 | 8.370459043 | 7.902518233 | 8.06764393  |
| 5.115399462 | 5.546839624 | 4.719818172 | 3.540664263 | 3.278533864 | 4.785889718 |
| 7.81263035  | 6.544747421 | 3.992332924 | 4.979745824 | 3.84055471  | 4.322310646 |
| 8.865135584 | 7.239939711 | 5.954412191 | 5.533900631 | 5.765139818 | 5.680258918 |
| 9.350856918 | 9.370766493 | 9.084684049 | 9.41985861  | 8.901133016 | 9.129706549 |
| 11.44734521 | 10.03853321 | 8.251034929 | 8.730467002 | 8.45839697  | 8.297942017 |
| 11.64580109 | 10.757667   | 9.617650046 | 9.671318788 | 9.540391511 | 9.467600345 |
| 8.400797408 | 8.008079944 | 7.817065633 | 7.754516373 | 7.786497519 | 7.559847953 |
| 8.318837345 | 8.013294912 | 7.030287001 | 7.238924263 | 6.895982713 | 7.011056979 |
| 7.856862399 | 7.275097979 | 5.42209455  | 5.533900631 | 5.680989096 | 5.924911051 |
| 11.61608345 | 10.75611249 | 9.460900913 | 9.130085219 | 9.076061327 | 9.203449559 |
| 12.01213466 | 11.48804701 | 10.99168309 | 11.06782706 | 10.89309719 | 10.76721498 |
| 9.025518803 | 9.212008588 | 9.061387953 | 8.94876571  | 8.973668744 | 8.919913927 |
| 3.502432386 | 2.735797961 | 3.8253578   | 3.892344006 | 3.987925368 | 3.260203441 |
| 10.04681427 | 9.156526401 | 8.369581995 | 8.546869343 | 8.367097167 | 8.161355003 |
| 8.344953553 | 7.558045101 | 6.97151315  | 7.130645691 | 6.759035418 | 6.651846005 |
| 8.400797408 | 7.719902426 | 6.697035148 | 6.666525816 | 6.932836069 | 6.463294335 |
| 10.02274778 | 8.650826455 | 7.800276882 | 7.939569392 | 7.604310945 | 7.574267058 |
| 4.523486615 | 5.189564533 | 5.019679186 | 5.513754578 | 5.956261216 | 5.625924432 |
| 7.612172519 | 6.051493279 | 3.296794681 | 4.366797664 | 3.987925368 | 4.178715345 |
| 8.524786085 | 7.099894    | 5.267812428 | 5.146033669 | 4.966893338 | 4.971638961 |
| 9.293006159 | 8.578787405 | 3.419133915 | 3.074635247 | 2.34524792  | 2.942211478 |
| 9.195905063 | 8.362914225 | 6.557473911 | 6.385334855 | 5.544776471 | 6.134028382 |
| 9.131346067 | 8.395231721 | 6.846254589 | 6.54274656  | 6.607711868 | 6.818579195 |
| 8.560887566 | 8.426841113 | 8.161846359 | 8.02745127  | 8.043987222 | 8.015763452 |
| 11.42853943 | 11.33402105 | 11.35810954 | 11.23558602 | 11.10975123 | 11.21538282 |
| 8.587382921 | 8.644118501 | 8.744909652 | 8.40641675  | 8.360349222 | 8.609309912 |
| 6.303700321 | 6.327496784 | 6.516945969 | 5.592703924 | 5.226392402 | 6.114429039 |
| 8.072274046 | 7.893971453 | 8.11283095  | 8.271945867 | 8.339913921 | 8.434611845 |
| 6.643775324 | 7.300915582 | 7.400728666 | 6.729023555 | 6.359633686 | 6.49395509  |
| 8.226330227 | 8.296022822 | 8.135317326 | 8.544388835 | 8.647642915 | 8.410706521 |
| 1.662934613 | 3.501126557 | 2.453859607 | 2.549633394 | 1           | 3.260203441 |
| 8.748669793 | 8.879350709 | 9.080054827 | 8.370459043 | 8.608314386 | 8.786950707 |
| 9.268654671 | 9.071586844 | 9.25453211  | 8.954382136 | 8.844232937 | 9.184776973 |
| 9.101018033 | 9.059033847 | 9.248356177 | 8.743501275 | 8.896476123 | 8.902877729 |
| 9.361130475 | 9.261058386 | 9.382235491 | 8.70626062  | 9.232054612 | 9.380030145 |
| 9.413898176 | 9.424601271 | 9.473310512 | 9.0966149   | 9.257700068 | 9.175349262 |
| 9.060613724 | 9.098824883 | 8.989153816 | 9.020127177 | 9.012922468 | 9.007524455 |
| 6.847498316 | 6.807432831 | 6.417703508 | 5.553769232 | 5.844651476 | 6.228219627 |
| 9.343103453 | 9.398931456 | 9.509911423 | 9.32332716  | 9.444752119 | 9.446201057 |
| 5.886632987 | 5.683962973 | 6.033160362 | 5.146033669 | 4.736161969 | 5.924911051 |
| 6.386500509 | 6.470857031 | 6.013872616 | 5.63061542  | 6.217515958 | 5.783149234 |
| 11.76954879 | 11.72421011 | 11.6954134  | 11.87448237 | 11.9619674  | 11.9100811  |
| 7.125762598 | 6.807432831 | 5.639043496 | 5.902624065 | 5.765139818 | 6.033255325 |

|             |             |             |             |             |             |
|-------------|-------------|-------------|-------------|-------------|-------------|
| 8.127482573 | 7.222033967 | 7.235714099 | 7.351040154 | 7.485305515 | 6.877903778 |
| 7.735756306 | 8.252583885 | 8.577650737 | 8.480948164 | 7.649294063 | 8.284850736 |
| 10.64091561 | 10.84288234 | 10.66918484 | 10.86310985 | 10.90936882 | 10.77113192 |
| 6.918782085 | 5.968011289 | 5.42209455  | 5.513754578 | 5.394349575 | 5.174538761 |
| 11.18138044 | 11.19235117 | 11.40790633 | 11.33616911 | 11.39947764 | 11.41533247 |
| 1.662934613 | 1           | 2.204484772 | 2.192163608 | 1.824050315 | 1           |
| 8.617691446 | 8.571735153 | 8.60690876  | 8.794491739 | 8.764697562 | 8.876940188 |
| 6.876435835 | 6.223342662 | 5.639043496 | 5.386586789 | 4.966893338 | 5.831967395 |
| 5.79866224  | 6.010356039 | 6.107831707 | 6.460935129 | 6.24708158  | 6.281917164 |
| 10.01950837 | 10.06514155 | 10.09125554 | 10.28438238 | 10.1806991  | 10.15257569 |
| 7.252583998 | 7.35941846  | 7.020656134 | 6.822071272 | 7.038063404 | 7.06310396  |
| 8.966182916 | 8.981331836 | 9.016061438 | 8.628765089 | 8.556120769 | 8.93395868  |
| 9.572617927 | 9.635443711 | 9.766247273 | 9.396668327 | 9.652351648 | 9.59327436  |
| 11.03746452 | 11.07879546 | 11.12124954 | 11.10491295 | 11.2668452  | 11.16208699 |
| 8.174843737 | 6.998357746 | 6.583873545 | 6.552654337 | 6.092794286 | 6.447716088 |
| 8.883070219 | 8.480543926 | 8.730212132 | 8.156496876 | 8.636515164 | 8.315214295 |
| 7.241504561 | 6.854682249 | 5.664004394 | 5.773020902 | 5.226392402 | 5.625924432 |
| 8.651567593 | 8.824039862 | 8.954165538 | 8.87763647  | 9.046940035 | 9.074987498 |
| 10.16146945 | 10.09496203 | 10.19551465 | 10.24673384 | 10.18833952 | 10.19751166 |
| 11.36423462 | 11.36341593 | 11.43670816 | 11.22980847 | 11.35689003 | 11.28989762 |
| 13.14316784 | 13.1424379  | 13.14652882 | 13.11483809 | 13.05936994 | 13.11257292 |
| 9.079402573 | 8.79102105  | 8.894776324 | 8.732647575 | 9.084274859 | 8.919913927 |
| 9.772507176 | 9.637133751 | 9.548960641 | 9.427955222 | 9.376163541 | 9.396352465 |
| 5.014872929 | 6.500868827 | 5.507318447 | 5.649204005 | 5.882822178 | 6.053980935 |
| 9.843838714 | 9.683668544 | 9.601589593 | 9.389776105 | 9.349152192 | 9.410484564 |
| 9.588007655 | 9.698312919 | 9.732721823 | 9.856682535 | 9.774126089 | 9.869490306 |
| 9.483733491 | 9.234510885 | 9.310933933 | 9.466460781 | 9.504118052 | 9.5354946   |
| 8.040664453 | 8.094268286 | 7.833661257 | 8.185440959 | 8.367097167 | 8.212950568 |
| 6.520865289 | 6.515643804 | 6.196043856 | 5.63061542  | 5.765139818 | 5.706677567 |
| 6.386500509 | 6.530269    | 6.609798764 | 5.6117842   | 5.591624257 | 6.333687577 |
| 8.560887566 | 8.391231403 | 8.403326432 | 8.438831371 | 8.526287065 | 8.68434101  |
| 9.24110647  | 9.278489152 | 9.227576676 | 9.594270406 | 9.786763696 | 9.575465513 |
| 8.736883465 | 8.630608293 | 8.380918065 | 8.086613079 | 8.255148951 | 8.199061053 |
| 5.380743228 | 5.426908942 | 5.331518423 | 4.453961963 | 4.461371462 | 4.322310646 |
| 5.569776566 | 5.924385992 | 5.736396015 | 5.6117842   | 5.340507563 | 5.480398947 |
| 8.350120538 | 8.252583885 | 8.066778631 | 7.909044147 | 7.569628571 | 8.015763452 |
| 6.193034368 | 6.168303034 | 6.557473911 | 6.328801425 | 6.304454951 | 6.38366441  |
| 4.448385543 | 5.26145301  | 4.569399469 | 4.453961963 | 4.121627621 | 5.417813565 |
| 6.34569435  | 6.485940968 | 6.899773294 | 6.846439922 | 6.838875062 | 6.830640875 |
| 7.523480337 | 7.454499711 | 7.480176534 | 6.969879803 | 7.167397529 | 6.934884941 |
| 4.285328166 | 5.189564533 | 1.520899766 | 2.699847117 | 1.824050315 | 2.533710429 |
| 6.862039628 | 6.955654079 | 7.039854002 | 7.287197001 | 7.408885913 | 7.341206929 |
| 9.163986653 | 8.962582937 | 8.870854877 | 8.825469202 | 8.858669725 | 8.947868023 |
| 9.361130475 | 9.434353922 | 9.670955741 | 9.38007134  | 9.355952589 | 9.503831202 |
| 8.097072351 | 8.013294912 | 7.9498577   | 8.153244726 | 8.339913921 | 8.36167369  |
| 3.999927798 | 1.552010398 | 1.520899766 | 1           | 1.824050315 | 1           |
| 10.34735443 | 10.28373656 | 10.28773436 | 10.36320171 | 10.50824757 | 10.44511243 |

|             |             |             |             |             |             |
|-------------|-------------|-------------|-------------|-------------|-------------|
| 7.541660341 | 7.35941846  | 7.001199353 | 6.886161377 | 6.67451722  | 6.794149027 |
| 9.751182764 | 9.575009328 | 9.760472441 | 9.770163671 | 9.970796222 | 9.932405757 |
| 9.238322496 | 9.376848303 | 9.262725775 | 9.683769426 | 9.488730737 | 9.537335687 |
| 5.604782933 | 6.455613719 | 5.782714705 | 7.090402967 | 6.561392014 | 6.678785233 |
| 7.486418266 | 7.407742238 | 7.324498692 | 7.275279396 | 7.054878598 | 6.818579195 |
| 7.856862399 | 8.321471928 | 8.691282727 | 8.837676315 | 8.653174768 | 8.713945207 |
| 9.550343855 | 9.550108449 | 9.595115014 | 9.470386082 | 9.525388248 | 9.562867213 |
| 11.73342723 | 11.89919934 | 12.10729787 | 12.18888064 | 12.19314452 | 12.11042729 |
| 11.71752256 | 11.72659332 | 11.93951471 | 11.67292675 | 11.66137359 | 11.74463902 |
| 12.12231415 | 12.17321647 | 12.15154291 | 12.11745974 | 12.24076719 | 12.18278655 |
| 5.115399462 | 4.812658923 | 5.057848307 | 4.82484461  | 5.446254265 | 4.735459195 |
| 7.594864927 | 7.375706898 | 7.607872738 | 7.90131084  | 7.776394435 | 7.847890869 |
| 13.27601767 | 13.29166952 | 13.39108125 | 13.39643673 | 13.61643617 | 13.51932397 |
| 9.709575929 | 9.760108337 | 9.926969808 | 9.837561888 | 9.756245372 | 9.75706817  |
| 5.914803605 | 6.091489973 | 6.013872616 | 5.685677723 | 5.765139818 | 5.947240612 |
| 4.196323698 | 4.859740248 | 4.621301235 | 3.892344006 | 2.727313987 | 3.396272977 |
| 4.448385543 | 4.231169995 | 4.812035592 | 3.540664263 | 2.727313987 | 3.635072154 |
| 9.68525051  | 9.80740678  | 9.986311992 | 10.02715028 | 9.979629553 | 9.996711862 |
| 7.646176987 | 7.782327225 | 7.74870557  | 7.581429295 | 7.485305515 | 7.768605476 |
| 10.81823345 | 10.74987766 | 11.01854401 | 10.78541454 | 10.76866015 | 10.75698088 |
| 12.0786243  | 11.92156095 | 11.90295852 | 12.1404304  | 12.34954129 | 12.04366803 |
| 1           | 8.967964674 | 8.865484702 | 1           | 1           | 9.12236595  |
| 7.820097176 | 7.842162587 | 7.74285995  | 7.537203481 | 7.382485901 | 7.298421905 |
| 9.707564403 | 9.688566538 | 9.859689861 | 10.04041359 | 10.07956174 | 9.998049412 |
| 9.04476724  | 8.896385738 | 9.025722923 | 9.093224761 | 9.318147381 | 9.194143476 |
| 5.886632987 | 4.905333542 | 5.827592445 | 5.738715534 | 4.558900638 | 4.628980122 |
| 8.893724949 | 8.744741787 | 8.727254575 | 8.454769599 | 8.247855159 | 8.496488044 |
| 8.617691446 | 8.660830267 | 8.838329825 | 8.473144351 | 8.712665055 | 8.530161518 |
| 8.659913784 | 8.778824344 | 8.81065401  | 8.526904828 | 8.439313262 | 8.674336393 |
| 8.591751889 | 8.603202297 | 8.616531047 | 8.223151344 | 8.445702588 | 8.284850736 |
| 7.820097176 | 8.152148722 | 8.076107449 | 8.02745127  | 8.276811654 | 8.026289875 |
| 10.33437714 | 10.34602941 | 10.28169923 | 10.10411859 | 10.14187801 | 10.23088727 |
| 9.204488908 | 9.137547834 | 9.187251574 | 9.32766126  | 9.279324784 | 9.386172676 |
| 11.66872867 | 11.75216221 | 11.84513336 | 11.90041536 | 11.91035197 | 11.93473647 |
| 7.338283488 | 7.614039621 | 7.860903323 | 7.710941977 | 7.796530343 | 7.552583996 |
| 7.207746394 | 7.222033967 | 7.355475681 | 7.287197001 | 7.151850774 | 7.26325617  |
| 8.459349571 | 8.706618864 | 8.709380763 | 8.873689895 | 8.764697562 | 8.911420975 |
| 9.287630127 | 9.412810393 | 9.545606703 | 9.212077406 | 9.163936423 | 9.251345348 |
| 8.966182916 | 8.929863981 | 9.070751581 | 9.139976746 | 9.24310139  | 9.168237827 |
| 9.198772023 | 9.091447181 | 8.976755185 | 8.739169589 | 9.132597638 | 9.085092029 |
| 7.230339378 | 7.431310391 | 7.316649392 | 7.316567293 | 7.341957365 | 7.62362841  |
| 7.849583926 | 8.23036389  | 8.166220822 | 8.433479258 | 8.117862275 | 8.315214295 |
| 8.203673875 | 7.853837522 | 8.213484316 | 8.093416445 | 7.948235386 | 8.015763452 |
| 8.939007238 | 9.154167688 | 9.439375774 | 9.437344195 | 9.415755361 | 9.249100294 |
| 6.609713527 | 7.157553616 | 7.316649392 | 7.275279396 | 7.434811497 | 7.33275083  |
| 7.013008761 | 7.212997062 | 7.451790029 | 7.614913661 | 7.714243478 | 7.923045069 |
| 4.285328166 | 4.157717108 | 5.095033568 | 5.171976075 | 5.446254265 | 5.211906216 |

|             |             |             |             |             |             |
|-------------|-------------|-------------|-------------|-------------|-------------|
| 5.254163095 | 5.51777861  | 6.143766352 | 5.806529446 | 6.18733174  | 6.264239129 |
| 7.495773425 | 7.222033967 | 8.033644375 | 7.675109349 | 7.408885913 | 7.500685692 |
| 11.26034709 | 11.24039561 | 11.26583794 | 11.10953481 | 11.29895998 | 11.23366593 |
| 7.113660841 | 7.157553616 | 7.473132098 | 7.784253821 | 7.806493878 | 6.978902989 |
| 6.592376231 | 6.733524099 | 6.672644045 | 6.763557417 | 6.488998496 | 6.806415822 |
| 3.345708554 | 4.157717108 | 3.734015431 | 3.458731245 | 1.824050315 | 3.839901004 |
| 9.971700673 | 10.00620315 | 9.881136998 | 9.997534566 | 10.09995935 | 10.15017142 |
| 6.609713527 | 6.408892928 | 6.013872616 | 6.396380483 | 7.003833377 | 7.032101622 |
| 7.252583998 | 7.719902426 | 7.363117106 | 7.70206691  | 7.766220101 | 7.841944312 |
| 7.603544677 | 7.981718538 | 7.783290457 | 7.333906686 | 7.522049061 | 7.64427699  |
| 6.047952674 | 5.760387573 | 5.664004394 | 5.065284254 | 4.894007383 | 5.174538761 |
| 9.169842772 | 9.074084389 | 9.098483254 | 8.914600098 | 9.29356326  | 9.077520273 |
| 9.373870388 | 9.500836607 | 9.355669253 | 9.377286518 | 9.534408916 | 9.635139517 |
| 8.879501084 | 8.70339601  | 8.756560805 | 8.501554287 | 8.400371424 | 8.4850866   |
| 7.113660841 | 7.070176343 | 6.790673794 | 6.47141889  | 6.537662192 | 6.463294335 |
| 10.05948743 | 10.06011098 | 10.10840619 | 9.94019329  | 10.06510985 | 10.08243321 |
| 4.523486615 | 3.911841602 | 3.163111837 | 4.651288752 | 4.650252065 | 3.839901004 |
| 9.418824456 | 9.265435861 | 9.020900268 | 8.843741356 | 8.995608088 | 8.972571815 |
| 10.20489625 | 10.21863217 | 10.08318159 | 9.964517682 | 10.09387029 | 10.00205464 |
| 8.36551138  | 8.261376937 | 8.174930154 | 8.156496876 | 8.233156008 | 8.310915573 |
| 5.99615815  | 6.168303034 | 6.609798764 | 6.932427077 | 7.054878598 | 6.399945895 |
| 5.420583385 | 5.683962973 | 5.954412191 | 5.721252018 | 5.496356219 | 5.597970034 |
| 7.920767218 | 7.882618087 | 7.833661257 | 7.433782069 | 7.546034951 | 7.743306648 |
| 9.353432174 | 9.267619628 | 9.391606112 | 9.313163336 | 9.386163822 | 9.082572523 |
| 9.509362842 | 9.521113872 | 9.442985673 | 9.246056978 | 9.564076849 | 9.436368178 |
| 9.895997731 | 9.828269435 | 9.891742177 | 9.584645289 | 10.00147912 | 9.802174995 |
| 13.5026043  | 13.47317018 | 13.5328013  | 13.37321324 | 13.50345379 | 13.42501949 |
| 10.8820511  | 10.86540622 | 11.08878069 | 10.94343855 | 11.25779608 | 11.09554403 |
| 3.502432386 | 4.231169995 | 3.531904981 | 4.01207407  | 2.727313987 | 4.452898434 |
| 8.370605389 | 8.142661809 | 8.283612017 | 8.486127353 | 8.477231534 | 8.507800089 |
| 8.966182916 | 9.088979539 | 8.991620807 | 8.952512422 | 9.239428521 | 8.978004571 |
| 9.92571932  | 9.932419051 | 9.991251466 | 10.0905809  | 10.30186668 | 10.32448647 |
| 8.976243256 | 8.997210643 | 8.75945895  | 8.504109481 | 8.795039474 | 8.914257518 |
| 7.759251653 | 7.431310391 | 6.732865614 | 6.969879803 | 6.24708158  | 6.781777037 |
| 3.643786876 | 3.091832257 | 1.902806559 | 2.960193298 | 2.34524792  | 2.942211478 |
| 6.557063793 | 5.07453361  | 4.277538014 | 4.791763656 | 3.029091357 | 4.452898434 |
| 7.379296842 | 7.477322183 | 7.480176534 | 6.862459978 | 6.877196886 | 7.00041841  |
| 8.078513698 | 8.147413064 | 8.242774405 | 8.531921918 | 8.514178671 | 8.382306933 |
| 8.459349571 | 8.216865747 | 7.975009955 | 7.71535912  | 7.930121997 | 7.637426915 |
| 8.918284181 | 9.225552039 | 9.105333674 | 8.739169589 | 8.877696762 | 8.969847747 |
| 7.892713944 | 8.079427921 | 8.033644375 | 8.204419361 | 8.312208637 | 8.297942017 |
| 8.48306192  | 8.403199233 | 8.432672907 | 8.519346328 | 8.619660932 | 8.736557913 |
| 8.684666505 | 8.623805447 | 8.648149585 | 8.747819994 | 9.104606408 | 8.93953852  |
| 10.54841844 | 10.51639692 | 10.6996821  | 10.5887962  | 10.61272995 | 10.63246308 |
| 10.29740712 | 10.43324025 | 10.26446131 | 9.973765089 | 10.04841418 | 10.32874501 |
| 9.104079688 | 9.209738933 | 9.295042865 | 9.283722952 | 9.632885465 | 9.544676631 |
| 6.502419644 | 6.57327552  | 7.010960543 | 7.169796276 | 7.07150006  | 6.85446586  |

|             |             |             |             |             |             |
|-------------|-------------|-------------|-------------|-------------|-------------|
| 7.637750714 | 7.876907723 | 7.658432351 | 7.633704343 | 7.649294063 | 7.559847953 |
| 7.687585568 | 7.627705145 | 7.514891816 | 7.316567293 | 7.485305515 | 7.366281848 |
| 6.677051441 | 6.642221239 | 7.010960543 | 7.097188526 | 6.858163212 | 7.30708102  |
| 7.74363068  | 7.965667343 | 7.676944545 | 7.37357278  | 7.557879992 | 7.574267058 |
| 1.662934613 | 2.924770305 | 1.520899766 | 1.715872115 | 3.278533864 | 1.559564046 |
| 7.306739728 | 7.529211193 | 7.588446538 | 7.328150013 | 7.557879992 | 7.438993164 |
| 6.741386012 | 6.770951703 | 7.176230489 | 7.470828805 | 7.054878598 | 7.199574979 |
| 6.073168917 | 5.546839624 | 5.451065511 | 4.411037997 | 4.461371462 | 5.174538761 |
| 2.115432786 | 2.51828802  | 2.204484772 | 1.40189026  | 1           | 1.961732649 |
| 8.752577268 | 8.832915367 | 9.096192533 | 9.366093158 | 9.167806335 | 9.107571742 |
| 8.806198941 | 8.657503365 | 8.626089581 | 8.449476397 | 8.573729283 | 8.664261912 |
| 8.824876588 | 8.821069185 | 9.008772625 | 8.931784039 | 8.819845872 | 8.853486483 |
| 8.243092012 | 8.469203273 | 8.238626339 | 7.865988625 | 8.069034919 | 8.047115071 |
| 10.54391604 | 10.42348004 | 10.57444608 | 10.23985152 | 10.38898786 | 10.2160212  |
| 9.495439669 | 9.380888646 | 9.370909809 | 9.326218006 | 9.254064225 | 9.233286325 |
| 8.565337387 | 8.647476377 | 8.626089581 | 8.430795737 | 8.406935165 | 8.289227709 |
| 6.520865289 | 6.455613719 | 5.871116192 | 5.513754578 | 5.340507563 | 5.056252732 |
| 4.369159279 | 4.905333542 | 4.856024081 | 5.822996311 | 5.036273452 | 5.480398947 |
| 7.369152291 | 7.800539838 | 7.683062863 | 7.610177499 | 7.328190834 | 7.423148832 |
| 8.587382921 | 8.660830267 | 8.524124682 | 8.891365077 | 8.942382123 | 8.780747032 |
| 9.93262454  | 10.06262846 | 10.24907843 | 10.16593618 | 10.24438821 | 10.28119514 |
| 5.638959969 | 3.911841602 | 4.069091575 | 1.715872115 | 1.824050315 | 3.260203441 |
| 7.184793961 | 6.854682249 | 6.311126551 | 6.374204007 | 6.276053451 | 5.807764794 |
| 8.226330227 | 7.367585666 | 6.647833469 | 6.281923436 | 6.276053451 | 6.509044524 |
| 8.053391518 | 8.161573659 | 7.713271195 | 7.788452429 | 7.286085063 | 8.062539036 |
| 4.448385543 | 1.552010398 | 1.902806559 | 1.40189026  | 1           | 1           |
| 8.370605389 | 8.278803879 | 8.327237278 | 8.210690418 | 8.043987222 | 8.4850866   |
| 1           | 9.111037827 | 9.316848245 | 1           | 1           | 9.312829034 |
| 11.29960257 | 11.31567021 | 11.22343765 | 11.39242011 | 11.43523604 | 11.44456781 |
| 9.713590586 | 9.652255681 | 9.86508161  | 9.938305085 | 9.94396701  | 9.943555888 |
| 9.687293367 | 9.699930934 | 9.847484243 | 9.475603259 | 9.382838091 | 9.531805362 |
| 11.27739869 | 11.34956667 | 10.96744911 | 10.80264181 | 11.09051228 | 10.96757503 |
| 7.948285383 | 7.700635837 | 7.822618746 | 8.016754369 | 8.027043853 | 8.052274737 |
| 13.38717196 | 13.3194333  | 13.42638522 | 13.45530597 | 13.53750218 | 13.50363613 |
| 10.9669036  | 10.94260618 | 11.07663185 | 11.12331219 | 11.0564751  | 11.10922421 |
| 10.83859627 | 10.81776753 | 10.87226196 | 10.87352248 | 10.95038643 | 10.89906577 |
| 10.53600288 | 10.58191811 | 10.64274545 | 10.78436382 | 10.89776498 | 10.7506467  |
| 10.59595201 | 10.62598925 | 10.61820922 | 10.77645895 | 10.76866015 | 10.81580787 |
| 11.18427638 | 11.28635312 | 11.36668767 | 11.33616911 | 11.42718661 | 11.48995586 |
| 10.33698195 | 10.48951901 | 10.24080667 | 10.39314848 | 10.60418736 | 10.62122311 |
| 9.810489302 | 9.657261305 | 9.7546744   | 9.887345385 | 9.905084043 | 9.865099029 |
| 6.890689805 | 6.530269    | 6.846254589 | 6.305552825 | 6.332308105 | 6.610469831 |
| 6.260447187 | 4.231169995 | 5.331518423 | 3.95345074  | 2.727313987 | 4.514011558 |
| 8.583000681 | 8.850504231 | 8.700360124 | 8.519346328 | 8.596877893 | 8.588151019 |
| 7.586132639 | 7.763881753 | 7.944774196 | 8.162979264 | 7.911778296 | 7.9342675   |
| 7.101456712 | 5.546839624 | 4.812035592 | 5.222502    | 4.966893338 | 5.174538761 |
| 9.006010078 | 9.071586844 | 9.136879116 | 8.991276389 | 9.136552417 | 8.723679798 |

|             |             |             |             |             |             |
|-------------|-------------|-------------|-------------|-------------|-------------|
| 8.390803443 | 7.266388411 | 6.910242852 | 6.702569621 | 5.844651476 | 6.718273747 |
| 8.868740391 | 8.841736604 | 8.824558281 | 8.668033134 | 8.514178671 | 8.426687334 |
| 10.546169   | 10.70142975 | 10.77250153 | 10.85712586 | 10.85520097 | 10.7242202  |
| 6.904804321 | 7.194751639 | 7.430127496 | 7.624339595 | 7.257315961 | 7.26325617  |
| 6.757031177 | 6.376883414 | 6.684891142 | 7.041988846 | 7.087932204 | 6.900967005 |
| 5.339771562 | 6.241232271 | 6.213057037 | 6.830239975 | 6.438635846 | 6.416045685 |
| 11.51101128 | 11.62251893 | 11.59758731 | 11.67661244 | 11.70463812 | 11.74384198 |
| 11.47598864 | 11.60276241 | 11.66598366 | 11.44589556 | 11.55605688 | 11.56993065 |
| 8.001795415 | 7.899614806 | 8.161846359 | 7.460340739 | 7.864871919 | 7.671356603 |
| 7.149665765 | 7.514575215 | 7.48718674  | 7.395758887 | 7.136134658 | 7.218058231 |
| 5.254163095 | 5.329928717 | 3.734015431 | 4.174877361 | 2.727313987 | 3.932350938 |
| 8.791080745 | 8.674061683 | 8.319402904 | 8.583574087 | 8.602607472 | 8.566677179 |
| 1           | 3.819597725 | 3.163111837 | 1           | 1           | 1.559564046 |
| 8.515617773 | 8.747873688 | 8.66060549  | 8.77346429  | 8.960343185 | 8.774516565 |
| 8.914801212 | 9.161232287 | 9.34991228  | 9.32332716  | 9.584487263 | 9.363521043 |
| 10.47936106 | 10.37973291 | 10.54703338 | 10.60911523 | 10.5680385  | 10.55642626 |
| 10.86590854 | 10.81851247 | 11.00822513 | 11.21506762 | 11.08642908 | 11.13316114 |
| 1.662934613 | 3.241540814 | 3.015764765 | 5.386586789 | 3.278533864 | 2.942211478 |
| 9.978389782 | 9.978474547 | 9.877139871 | 10.04568495 | 10.0058096  | 10.16095923 |
| 6.817968469 | 4.431445628 | 3.531904981 | 3.828534121 | 2.727313987 | 3.520607779 |
| 11.07539671 | 11.07568304 | 11.1042518  | 11.08456977 | 11.31300691 | 11.20151682 |
| 8.276042421 | 7.674540158 | 7.817065633 | 7.771584182 | 7.649294063 | 7.581422925 |
| 8.231939155 | 8.430744032 | 8.610123325 | 7.889632595 | 7.974986069 | 8.132414325 |
| 10.67734361 | 10.67123044 | 10.62775668 | 10.70607261 | 10.78260794 | 10.65807205 |
| 3.999927798 | 3.615275167 | 2.453859607 | 1.715872115 | 1.824050315 | 1.961732649 |
| 11.16754477 | 11.18254726 | 11.06320753 | 11.22980847 | 11.30950798 | 11.23989761 |
| 6.406478774 | 4.859740248 | 2.453859607 | 1.715872115 | 1           | 1.961732649 |
| 8.203673875 | 8.426841113 | 8.57106758  | 8.172648558 | 8.149519283 | 8.442493064 |
| 6.520865289 | 6.241232271 | 6.5440907   | 6.328801425 | 5.723677922 | 6.264239129 |
| 7.878480057 | 7.960277013 | 7.898198157 | 8.280913921 | 8.117862275 | 8.127533928 |
| 8.569773526 | 8.450101804 | 8.564454247 | 8.987629132 | 8.809974438 | 8.707418795 |
| 8.053391518 | 7.634489671 | 7.276749231 | 7.090402967 | 7.167397529 | 6.877903778 |
| 8.151357495 | 8.225878527 | 8.157458592 | 8.40914596  | 8.21830555  | 8.142125867 |
| 5.886632987 | 5.362985128 | 5.095033568 | 4.411037997 | 4.894007383 | 4.514011558 |
| 7.457983205 | 7.099894    | 7.444605265 | 7.522155048 | 7.167397529 | 7.152303519 |
| 6.215857103 | 6.695099597 | 6.756267574 | 6.991893455 | 6.276053451 | 7.032101622 |
| 9.190153994 | 9.467028293 | 9.21285087  | 9.326218006 | 9.444752119 | 9.375920547 |
| 10.17899734 | 10.14095227 | 10.2251681  | 9.654165603 | 10.17686366 | 10.10991131 |
| 10.92163456 | 11.02365742 | 10.89088364 | 10.85662607 | 10.82977939 | 10.90549487 |
| 7.495773425 | 7.634489671 | 7.227365129 | 6.886161377 | 7.087932204 | 6.818579195 |
| 7.025981046 | 5.735359855 | 5.871116192 | 5.933284016 | 5.394349575 | 4.971638961 |
| 7.369152291 | 7.763881753 | 7.12321663  | 6.788925927 | 7.42190694  | 7.407128556 |
| 8.090912621 | 7.899614806 | 8.230294254 | 7.881794248 | 7.835978159 | 8.087884767 |
| 8.415659735 | 8.274466839 | 8.464989507 | 8.016754369 | 7.948235386 | 8.137278267 |
| 7.137763686 | 6.360608329 | 5.639043496 | 5.341578351 | 6.217515958 | 5.597970034 |
| 3.345708554 | 4.231169995 | 3.531904981 | 4.366797664 | 4.356767986 | 3.260203441 |
| 5.497107678 | 5.07453361  | 5.331518423 | 5.933284016 | 4.966893338 | 5.855770664 |

|             |             |             |             |             |             |
|-------------|-------------|-------------|-------------|-------------|-------------|
| 6.022287836 | 6.57327552  | 6.357769641 | 6.091171049 | 6.059853167 | 5.807764794 |
| 8.556423977 | 8.553952214 | 8.551135932 | 8.204419361 | 8.501967792 | 8.422708696 |
| 5.20937531  | 3.377164271 | 3.015764765 | 2.192163608 | 1           | 2.275883944 |
| 5.297602228 | 5.07453361  | 5.782714705 | 5.902624065 | 6.359633686 | 5.969229824 |
| 10.87310532 | 10.79220776 | 10.95612541 | 10.93304619 | 11.00115589 | 10.87451617 |
| 9.733497986 | 9.847375429 | 9.977627008 | 9.436006648 | 9.482529562 | 9.67247709  |
| 9.327470385 | 9.196045507 | 9.274929675 | 9.531780477 | 9.366093457 | 9.505713117 |
| 7.038837728 | 6.708021809 | 6.899773294 | 6.878304096 | 6.819325541 | 7.042509934 |
| 5.420583385 | 4.607277728 | 5.534643218 | 5.146033669 | 6.304454951 | 5.625924432 |
| 8.732933193 | 8.442389836 | 8.461434315 | 8.020328823 | 8.339913921 | 8.25383437  |
| 8.46888133  | 8.407166549 | 8.439917192 | 8.086613079 | 8.035540411 | 8.180331209 |
| 5.297602228 | 4.99241264  | 5.131284419 | 3.828534121 | 4.736161969 | 4.019231643 |
| 5.20937531  | 5.29609709  | 5.16664667  | 5.430233455 | 5.102469568 | 5.569463256 |
| 8.324098545 | 8.32567014  | 8.338909643 | 7.889632595 | 7.992548208 | 8.212950568 |
| 9.731519562 | 9.780132284 | 9.698398733 | 9.495001341 | 9.862738607 | 9.830981021 |
| 7.629274937 | 7.949435554 | 7.970014462 | 8.136873096 | 8.109838281 | 7.454665375 |
| 8.529348484 | 8.766523646 | 8.770993659 | 9.003969659 | 9.279324784 | 8.742954118 |
| 8.911309814 | 8.899205456 | 8.756560805 | 8.65429554  | 8.774882601 | 8.707418795 |
| 7.274490835 | 7.185541663 | 6.94120324  | 7.333906686 | 6.914527064 | 6.781777037 |
| 7.577347176 | 7.351204755 | 7.408134727 | 7.916736221 | 7.845673852 | 7.730488902 |
| 5.768104837 | 3.615275167 | 1.902806559 | 3.074635247 | 3.029091357 | 1.961732649 |
| 8.237526361 | 8.25698711  | 8.238626339 | 7.962046811 | 7.604310945 | 7.781090449 |
| 6.502419644 | 7.090055974 | 6.846254589 | 7.226599411 | 6.968771416 | 7.30708102  |
| 10.10604432 | 9.973131945 | 9.851564267 | 9.371700693 | 9.769039887 | 9.631696783 |
| 10.59268606 | 10.57311657 | 10.73618347 | 10.66840972 | 10.80390183 | 10.70714775 |
| 8.420580014 | 8.234835352 | 8.07145058  | 7.976839529 | 7.604310945 | 7.853813016 |
| 8.668211968 | 7.842162587 | 6.684891142 | 6.591618726 | 6.537662192 | 6.877903778 |
| 10.76506552 | 10.18205261 | 9.591866795 | 9.708352913 | 9.507175918 | 9.367666064 |
| 9.72158654  | 9.805904982 | 9.946175303 | 9.894179978 | 10.0187236  | 9.915517296 |
| 2.736907833 | 1.950285237 | 3.015764765 | 1.715872115 | 1           | 1.559564046 |
| 10.70079074 | 10.65463941 | 10.63724137 | 10.74277723 | 10.8813612  | 10.79672039 |
| 10.07205024 | 10.06262846 | 9.976382017 | 9.803737877 | 9.806756392 | 9.791415567 |
| 2.969564903 | 3.501126557 | 3.163111837 | 3.761770816 | 4.461371462 | 3.520607779 |
| 5.459352853 | 5.457839158 | 5.095033568 | 5.855376688 | 5.805443346 | 5.01456608  |
| 6.677051441 | 5.809176966 | 5.479466135 | 5.533900631 | 4.894007383 | 4.927395279 |
| 8.604779966 | 8.735305083 | 8.813445605 | 8.422715096 | 8.353569567 | 8.616294474 |
| 9.155157661 | 8.757228803 | 8.733163639 | 9.143258909 | 9.307662584 | 8.969847747 |
| 9.038379587 | 9.205188884 | 9.182940512 | 8.561663488 | 8.910401945 | 8.98880909  |
| 8.828583275 | 8.647476377 | 8.870854877 | 9.036105741 | 9.055320558 | 8.897153996 |
| 7.913804874 | 8.002846057 | 8.335029339 | 8.009578783 | 8.346757901 | 8.010471298 |
| 4.594870902 | 3.819597725 | 3.015764765 | 2.549633394 | 1.824050315 | 2.275883944 |
| 7.81263035  | 7.800539838 | 7.766101646 | 7.893535856 | 7.930121997 | 7.53794543  |
| 7.28532076  | 7.499789234 | 7.689155344 | 7.605425738 | 7.485305515 | 7.595629052 |
| 9.476663919 | 9.582045632 | 9.650806033 | 9.728159687 | 9.359340805 | 9.511344175 |
| 4.101465124 | 5.26145301  | 4.812035592 | 4.857183992 | 4.356767986 | 4.881751715 |
| 5.339771562 | 3.091832257 | 3.531904981 | 3.074635247 | 2.727313987 | 1.559564046 |
| 8.704974225 | 8.754117167 | 8.744909652 | 9.058877876 | 8.863450061 | 8.891407465 |

|             |             |             |             |             |             |
|-------------|-------------|-------------|-------------|-------------|-------------|
| 8.008346747 | 8.118667951 | 7.860903323 | 8.204419361 | 8.117862275 | 7.730488902 |
| 6.643775324 | 6.25890276  | 5.934034702 | 5.918035487 | 5.991624824 | 6.20986693  |
| 9.166917683 | 8.938113549 | 9.145766844 | 8.956249429 | 8.619660932 | 8.720442227 |
| 7.842268546 | 7.375706898 | 6.475246535 | 6.657372381 | 6.738365512 | 5.969229824 |
| 6.609713527 | 6.205228431 | 5.362346647 | 4.495645642 | 4.356767986 | 4.785889718 |
| 10.674257   | 10.70142975 | 10.81351607 | 10.80108417 | 10.56510708 | 10.58073266 |
| 8.752577268 | 8.234835352 | 8.331138569 | 8.185440959 | 7.546034951 | 7.73691201  |
| 8.197953754 | 8.147413064 | 7.954923354 | 7.90131084  | 8.312208637 | 7.871434979 |
| 6.741386012 | 5.879400277 | 5.42209455  | 5.703574518 | 6.696115476 | 5.947240612 |
| 8.732933193 | 8.633997724 | 8.81065401  | 8.881572278 | 8.982484558 | 8.978004571 |
| 8.286860749 | 7.871174666 | 7.892928988 | 7.517103819 | 7.355593773 | 7.64427699  |
| 9.62257966  | 9.511932248 | 9.400916261 | 9.689393479 | 9.932639224 | 9.744372645 |
| 11.78917946 | 11.45441342 | 10.98798118 | 11.22168084 | 11.06583789 | 11.0185516  |
| 11.87413046 | 11.88824206 | 11.97485577 | 12.02774113 | 12.16098515 | 12.08893416 |
| 9.946336611 | 9.87054837  | 10.00596922 | 10.12169618 | 10.19024332 | 10.14776314 |
| 8.478350527 | 8.391231403 | 8.279579883 | 8.103561713 | 7.920979301 | 7.774861468 |
| 4.594870902 | 4.949529988 | 5.16664667  | 5.918035487 | 5.591624257 | 5.01456608  |
| 6.047952674 | 5.426908942 | 5.019679186 | 4.453961963 | 4.558900638 | 4.178715345 |
| 3.643786876 | 4.231169995 | 4.856024081 | 3.27942815  | 2.727313987 | 3.260203441 |
| 6.386500509 | 7.090055974 | 6.767827725 | 7.034937983 | 7.460279405 | 7.052843694 |
| 9.066903901 | 9.041274108 | 9.351833825 | 8.989453913 | 9.132597638 | 9.100117356 |
| 8.764236591 | 8.763432014 | 8.741982103 | 8.32493657  | 8.532303365 | 8.36167369  |
| 8.736883465 | 8.735305083 | 8.454297539 | 8.304559715 | 8.21830555  | 8.271639574 |
| 3.89069954  | 3.615275167 | 4.671400465 | 5.902624065 | 4.966893338 | 5.01456608  |
| 8.928682918 | 9.396937807 | 9.508189418 | 9.470386082 | 10.04631357 | 9.77590441  |
| 3.772519063 | 4.157717108 | 1.520899766 | 3.618193167 | 4.356767986 | 2.275883944 |
| 8.265142357 | 8.225878527 | 8.676025646 | 8.544388835 | 8.754440107 | 8.591699121 |
| 7.927696123 | 7.719902426 | 7.866290548 | 7.99874804  | 8.393777685 | 8.137278267 |
| 9.923987839 | 9.532055239 | 9.62561372  | 9.664481968 | 9.753672797 | 9.703963379 |
| 10.27856066 | 10.14570915 | 10.01690984 | 10.13741726 | 10.14187801 | 10.25681929 |
| 8.497104481 | 7.933019061 | 7.568755185 | 7.522155048 | 6.914527064 | 7.651094694 |
| 10.74264806 | 10.80654694 | 10.80161489 | 10.88631105 | 10.95711074 | 10.94139498 |
| 9.190153994 | 9.216537213 | 9.448383643 | 9.422562532 | 9.507175918 | 9.518818226 |
| 5.569776566 | 5.879400277 | 4.94017096  | 4.651288752 | 4.121627621 | 4.452898434 |
| 10.82659846 | 10.81328976 | 10.73691886 | 10.57184529 | 10.73122896 | 10.7185518  |
| 10.57182821 | 10.65880509 | 10.63487604 | 10.75248109 | 10.80514467 | 10.68904295 |
| 10.87489892 | 10.43324025 | 9.689308948 | 9.79019245  | 9.753672797 | 9.692442962 |
| 9.303698493 | 9.108603495 | 9.049597303 | 8.851788617 | 8.868214611 | 9.08004861  |
| 12.12231415 | 12.23338922 | 12.26423205 | 11.45582898 | 11.97748459 | 12.06104968 |
| 11.99326874 | 11.94528751 | 11.95981548 | 12.17491661 | 12.13700329 | 12.1313002  |
| 8.721017063 | 8.824039862 | 8.773862984 | 9.000354392 | 8.868214611 | 8.969847747 |
| 7.089148463 | 7.222033967 | 7.218967562 | 7.176219313 | 6.932836069 | 6.53875802  |
| 7.523480337 | 7.477322183 | 7.001199353 | 7.257216343 | 7.581282249 | 7.588543475 |
| 7.296069994 | 7.0801504   | 7.114188451 | 7.496720166 | 7.447601649 | 7.515705258 |
| 9.607556244 | 9.426557082 | 9.520200512 | 9.436006648 | 10.08571136 | 10.03760992 |
| 9.766722616 | 9.982468555 | 9.825527071 | 10.10243331 | 10.3314955  | 10.119775   |
| 1.662934613 | 3.615275167 | 1           | 2.699847117 | 1           | 2.533710429 |



|             |             |             |             |             |             |
|-------------|-------------|-------------|-------------|-------------|-------------|
| 6.832808945 | 7.738915105 | 7.970014462 | 7.732893681 | 7.434811497 | 7.431092749 |
| 8.215046526 | 8.234835352 | 8.130848002 | 8.116978704 | 7.883817868 | 8.127533928 |
| 12.38995209 | 12.44548438 | 12.44408996 | 12.52616736 | 12.54780291 | 12.48492984 |
| 7.719877435 | 7.529211193 | 7.415502964 | 7.433782069 | 7.087932204 | 6.610469831 |
| 8.824876588 | 8.453942384 | 8.676025646 | 8.663468455 | 8.877696762 | 8.814541786 |
| 8.186445019 | 8.079427921 | 8.17058206  | 7.169796276 | 7.786497519 | 8.026289875 |
| 7.899778568 | 7.824471101 | 7.370718271 | 7.006384799 | 7.355593773 | 7.042509934 |
| 9.260445303 | 9.115894203 | 9.326651869 | 9.430644026 | 9.425485847 | 9.271395154 |
| 5.828585816 | 6.031071278 | 5.934034702 | 4.950067607 | 4.356767986 | 4.927395279 |
| 9.64377388  | 9.653926153 | 9.553976973 | 9.728159687 | 9.794293461 | 9.845914177 |
| 10.17317834 | 10.20045832 | 10.13765938 | 9.910644713 | 10.28771032 | 10.11114797 |
| 4.90681358  | 5.51777861  | 4.856024081 | 5.364258082 | 5.765139818 | 5.248330196 |
| 8.989548835 | 9.158881263 | 9.054325133 | 9.118458728 | 9.31116599  | 9.286799058 |
| 2.459379109 | 1           | 1.520899766 | 2.549633394 | 3.491138785 | 3.520607779 |
| 10.06421131 | 10.17625234 | 10.30964965 | 10.32396874 | 10.44587114 | 10.33405056 |
| 6.999918773 | 7.099894    | 7.049357978 | 7.345351577 | 7.534091853 | 7.39905121  |
| 7.523480337 | 7.558045101 | 7.535326966 | 7.110664642 | 7.151850774 | 6.76929803  |
| 6.520865289 | 6.440207626 | 6.213057037 | 5.738715534 | 5.723677922 | 5.732621125 |
| 10.97361493 | 10.9582387  | 10.88558764 | 10.66098671 | 10.71809314 | 10.75460882 |
| 7.486418266 | 7.600243416 | 7.437384541 | 7.207912435 | 7.534091853 | 7.30708102  |
| 8.286860749 | 8.465403158 | 8.616531047 | 8.61936812  | 8.464702518 | 8.446417588 |
| 6.802973746 | 6.615037045 | 6.721020726 | 6.418221226 | 6.156502484 | 5.706677567 |
| 8.832280463 | 8.265753447 | 8.221913768 | 7.991482107 | 8.733703782 | 8.552181633 |
| 6.986708928 | 6.470857031 | 6.388047781 | 6.830239975 | 7.314291673 | 7.123178845 |
| 7.646176987 | 7.65465389  | 7.719237693 | 8.100187878 | 8.33303732  | 8.280460444 |
| 1           | 1           | 2.666415399 | 1.40189026  | 1           | 1           |
| 4.101465124 | 3.72105059  | 3.163111837 | 4.411037997 | 4.894007383 | 4.38908158  |
| 6.406478774 | 4.763989148 | 5.057848307 | 4.274026533 | 3.987925368 | 3.635072154 |
| 7.369152291 | 6.877739053 | 7.3008215   | 6.746393813 | 7.197997286 | 6.877903778 |
| 8.501755124 | 8.465403158 | 8.603687017 | 8.546869343 | 8.567883626 | 8.713945207 |
| 7.93459191  | 7.848011864 | 7.839150978 | 7.547149267 | 7.104179293 | 7.462438096 |
| 10.15114563 | 10.09496203 | 9.859689861 | 9.877525169 | 9.932639224 | 9.966967599 |
| 5.886632987 | 5.946363531 | 4.719818172 | 5.092705987 | 4.121627621 | 5.056252732 |
| 4.790000379 | 3.998540311 | 5.267812428 | 4.453961963 | 5.102469568 | 4.38908158  |
| 9.012542342 | 8.838802181 | 8.669877348 | 8.534423935 | 8.805013275 | 8.450331464 |
| 7.064212394 | 6.3106516   | 6.372988141 | 6.021538103 | 5.636998506 | 5.653347452 |
| 5.942434672 | 6.544747421 | 6.143766352 | 6.755001139 | 5.636998506 | 6.399945895 |
| 8.600450332 | 8.772687104 | 8.776726613 | 8.817273365 | 8.470980627 | 8.623245384 |
| 5.420583385 | 4.36772701  | 4.719818172 | 4.791763656 | 3.676399415 | 4.38908158  |
| 6.146276344 | 5.832966557 | 5.019679186 | 4.950067607 | 4.356767986 | 5.211906216 |
| 7.842268546 | 8.069448851 | 8.547787053 | 8.353555996 | 8.346757901 | 8.199061053 |
| 1.662934613 | 1.950285237 | 2.453859607 | 2.192163608 | 1.824050315 | 2.752371363 |
| 9.695435992 | 10.00751036 | 10.10499233 | 10.27693086 | 10.26981727 | 10.11608402 |
| 8.06600729  | 8.08439169  | 8.057389097 | 8.009578783 | 8.165091048 | 7.911734657 |
| 3.169860822 | 4.080322903 | 3.63649658  | 4.411037997 | 4.121627621 | 4.735459195 |
| 5.380743228 | 4.431445628 | 5.267812428 | 4.575565097 | 4.461371462 | 4.019231643 |
| 7.805124677 | 8.059400275 | 7.989893479 | 8.090018772 | 8.495823376 | 8.297942017 |

|             |             |             |             |             |             |
|-------------|-------------|-------------|-------------|-------------|-------------|
| 8.813699042 | 8.899205456 | 9.016061438 | 9.230710858 | 9.179354175 | 8.902877729 |
| 5.066011601 | 5.575326786 | 5.479466135 | 5.341578351 | 5.226392402 | 5.385472394 |
| 2.459379109 | 2.262061444 | 2.851638739 | 2.549633394 | 2.727313987 | 3.260203441 |
| 4.369159279 | 3.911841602 | 3.63649658  | 3.761770816 | 3.491138785 | 3.932350938 |
| 5.497107678 | 6.168303034 | 6.279171741 | 6.629558379 | 6.652590701 | 6.299381202 |
| 1           | 1.552010398 | 1           | 1           | 1           | 1           |
| 1.662934613 | 1.552010398 | 1.520899766 | 1           | 1           | 1           |
| 8.989548835 | 9.005084986 | 9.023313611 | 9.227621948 | 9.104606408 | 9.332047871 |
| 3.169860822 | 2.262061444 | 1           | 1.715872115 | 2.34524792  | 1.961732649 |
| 5.339771562 | 6.010356039 | 5.362346647 | 4.651288752 | 3.987925368 | 5.136177653 |
| 2.969564903 | 3.377164271 | 4.719818172 | 5.318536384 | 5.036273452 | 5.211906216 |
| 9.178582619 | 9.37482388  | 9.219180344 | 9.354812273 | 9.578685121 | 9.461795584 |
| 9.073166772 | 8.967964674 | 8.718345349 | 8.85979124  | 9.409231718 | 8.996859708 |
| 6.022287836 | 5.683962973 | 6.311126551 | 5.341578351 | 6.026142292 | 5.569463256 |
| 2.969564903 | 4.661428457 | 4.211346654 | 3.828534121 | 3.676399415 | 4.252298811 |
| 5.497107678 | 5.657561172 | 6.013872616 | 6.035736161 | 6.412779514 | 6.172445927 |
| 6.876435835 | 7.300915582 | 6.647833469 | 6.729023555 | 7.314291673 | 6.934884941 |
| 3.89069954  | 2.51828802  | 3.015764765 | 3.180662487 | 4.736161969 | 2.533710429 |
| 2.969564903 | 1.950285237 | 2.666415399 | 4.01207407  | 2.727313987 | 3.839901004 |
| 2.459379109 | 2.924770305 | 2.204484772 | 3.180662487 | 3.029091357 | 3.741118641 |
| 6.047952674 | 6.485940968 | 6.813163712 | 6.684660279 | 6.125000019 | 6.172445927 |
| 5.380743228 | 5.26145301  | 5.234872487 | 5.855376688 | 5.723677922 | 6.033255325 |
| 7.389370557 | 6.97716391  | 7.276749231 | 7.745906146 | 6.858163212 | 7.664634203 |
| 5.828585816 | 4.713619986 | 5.095033568 | 4.366797664 | 3.84055471  | 4.683201781 |
| 2.115432786 | 1.552010398 | 1.902806559 | 1           | 1           | 1           |
| 4.285328166 | 2.51828802  | 3.911259693 | 4.651288752 | 4.817242336 | 4.252298811 |
| 1           | 1.950285237 | 1.520899766 | 2.835884957 | 4.461371462 | 1.559564046 |
| 5.969546468 | 6.3106516   | 6.835308414 | 6.780519224 | 6.332308105 | 6.85446586  |
| 10.08140107 | 10.28265722 | 10.37062586 | 10.22753462 | 10.23519667 | 10.3982679  |
| 8.76036061  | 8.633997724 | 8.475602818 | 8.059074177 | 8.305198378 | 8.426687334 |
| 10.83214831 | 10.83259384 | 11.01793906 | 10.95935365 | 11.1947092  | 11.0491983  |
| 11.73243831 | 11.69773161 | 11.71830904 | 11.77060442 | 11.90977438 | 11.87556789 |
| 10.60894238 | 10.58892088 | 10.79456805 | 10.51850054 | 10.35714263 | 10.44707247 |
| 12.04037849 | 12.00311474 | 11.99743314 | 11.81501371 | 11.77672949 | 11.81424819 |
| 7.438710287 | 7.351204755 | 7.408134727 | 7.137245015 | 7.213057172 | 6.989700808 |
| 7.93459191  | 7.916413612 | 7.719237693 | 7.754516373 | 7.816389075 | 7.704506626 |
| 11.78822803 | 11.81472963 | 11.80186103 | 11.73542556 | 12.02466053 | 11.95622767 |
| 4.594870902 | 3.377164271 | 3.163111837 | 4.225303533 | 3.278533864 | 3.741118641 |
| 7.495773425 | 7.148102294 | 7.227365129 | 6.893976097 | 6.914527064 | 6.718273747 |
| 1           | 1           | 1.520899766 | 2.38194199  | 3.987925368 | 1.559564046 |
| 11.6150107  | 11.69286468 | 11.50435103 | 11.59596652 | 11.95806189 | 11.75020604 |
| 11.29156792 | 11.45680782 | 11.41435661 | 11.33509317 | 11.36786565 | 11.39262916 |
| 1.662934613 | 1           | 1.520899766 | 1.715872115 | 2.727313987 | 3.741118641 |
| 5.339771562 | 4.859740248 | 4.340825246 | 4.411037997 | 4.461371462 | 5.136177653 |
| 7.612172519 | 7.927505121 | 7.473132098 | 7.322370277 | 6.819325541 | 7.18085185  |
| 7.78999516  | 7.55089047  | 7.555476699 | 6.886161377 | 6.858163212 | 7.021617672 |
| 6.986708928 | 6.758583409 | 7.184879784 | 7.379151374 | 7.534091853 | 7.254329153 |

|             |             |             |             |             |             |
|-------------|-------------|-------------|-------------|-------------|-------------|
| 11.92825083 | 12.01225992 | 11.93663686 | 11.82347813 | 11.89233837 | 11.89220853 |
| 9.054296002 | 8.999840203 | 8.926066818 | 8.642746767 | 8.596877893 | 8.548534875 |
| 8.511011674 | 8.856319854 | 8.821788126 | 8.869732495 | 8.712665055 | 8.796206488 |
| 6.169844777 | 6.720829303 | 6.246493087 | 6.221099191 | 6.464036922 | 6.191277754 |
| 8.696885408 | 8.510356944 | 8.66060549  | 8.133576357 | 8.642089768 | 8.434611845 |
| 7.612172519 | 7.713508775 | 7.480176534 | 7.226599411 | 7.460279405 | 7.678047825 |
| 12.09910093 | 11.81808591 | 11.8221009  | 11.98012544 | 11.89058312 | 11.77577517 |
| 6.502419644 | 6.3106516   | 6.489280693 | 5.513754578 | 5.680989096 | 5.732621125 |
| 9.5139742   | 9.436296565 | 9.506465355 | 9.224526409 | 9.564076849 | 9.522540781 |
| 11.78202845 | 11.81883069 | 11.75978553 | 11.80468678 | 12.09137945 | 11.97094704 |
| 8.515617773 | 8.476773605 | 7.939672717 | 8.052106523 | 8.133777608 | 7.999828393 |
| 7.93459191  | 7.848011864 | 7.535326966 | 7.150353784 | 7.649294063 | 7.581422925 |
| 9.99167567  | 9.723985888 | 9.947446624 | 9.674725087 | 9.968579413 | 9.985966586 |
| 6.932625722 | 6.795374665 | 6.5440907   | 6.13139265  | 5.956261216 | 6.416045685 |
| 10.19631484 | 10.11086107 | 10.06455539 | 9.808913979 | 10.22222934 | 10.12100323 |
| 5.638959969 | 6.168303034 | 5.849518442 | 5.065284254 | 5.723677922 | 5.831967395 |
| 8.587382921 | 8.252583885 | 8.130848002 | 8.016754369 | 8.069034919 | 8.240334759 |
| 8.506390823 | 8.800101385 | 8.669877348 | 8.827510908 | 8.89180415  | 8.93395868  |
| 9.169842772 | 9.346179581 | 9.459119367 | 9.232252837 | 8.973668744 | 9.158701055 |
| 6.890689805 | 6.81939105  | 6.92063698  | 6.962466637 | 7.434811497 | 7.011056979 |
| 7.409309391 | 7.81255509  | 7.601426359 | 7.238924263 | 7.592842545 | 7.811838214 |
| 8.949258199 | 8.62721088  | 8.638736571 | 8.133576357 | 8.733703782 | 8.717197374 |
| 7.719877435 | 7.579298539 | 7.430127496 | 6.772063248 | 7.447601649 | 7.103430536 |
| 7.038837728 | 6.854682249 | 6.756267574 | 6.638889421 | 6.125000019 | 6.794149027 |
| 7.306739728 | 7.222033967 | 7.114188451 | 6.684660279 | 6.838875062 | 6.806415822 |
| 6.238324409 | 6.57327552  | 6.846254589 | 6.512608315 | 6.513535519 | 6.692068528 |
| 4.594870902 | 2.262061444 | 1.520899766 | 1.715872115 | 1           | 1.559564046 |
| 4.90681358  | 6.010356039 | 6.744614044 | 6.47141889  | 5.956261216 | 6.478706163 |
| 11.57309132 | 11.57746009 | 11.77346968 | 11.78380848 | 11.81979265 | 11.85578512 |
| 7.654554331 | 6.843014175 | 6.125910909 | 6.091171049 | 6.217515958 | 6.478706163 |
| 6.215857103 | 6.530269    | 6.3268424   | 5.918035487 | 5.446254265 | 5.879187565 |
| 5.066011601 | 3.501126557 | 2.851638739 | 3.458731245 | 3.029091357 | 2.275883944 |
| 8.410722619 | 8.488055137 | 8.226110096 | 7.91289531  | 8.035540411 | 8.102881187 |
| 7.064212394 | 7.446811278 | 7.548791342 | 6.638889421 | 6.838875062 | 6.756710141 |
| 9.481380814 | 9.566165414 | 9.745933413 | 9.533032151 | 9.950721232 | 9.879684935 |
| 8.248636274 | 8.064433312 | 8.103737339 | 7.77581977  | 7.692916917 | 7.883064498 |
| 8.459349571 | 8.517714921 | 8.436299597 | 8.120313546 | 8.085495004 | 8.137278267 |
| 9.143300989 | 9.091447181 | 9.178616529 | 9.215199743 | 9.454289623 | 9.344719651 |
| 7.064212394 | 7.415641146 | 7.393284389 | 7.706511268 | 6.607711868 | 7.33275083  |
| 9.49310602  | 9.685303057 | 9.511631375 | 9.736876161 | 9.905084043 | 9.878232963 |
| 8.231939155 | 8.346479883 | 8.139772847 | 7.561940557 | 8.077288436 | 8.161355003 |
| 7.849583926 | 7.579298539 | 7.607872738 | 7.263262524 | 7.227961475 | 7.123178845 |
| 8.897259111 | 8.763432014 | 9.011206323 | 8.980306841 | 8.872963477 | 9.251345348 |
| 5.569776566 | 3.998540311 | 2.204484772 | 3.27942815  | 2.727313987 | 2.752371363 |
| 3.643786876 | 3.377164271 | 3.8253578   | 4.411037997 | 4.650252065 | 4.834616782 |
| 11.13946891 | 11.15980096 | 11.30007794 | 11.32645665 | 11.46699205 | 11.07604454 |
| 7.137763686 | 7.138588647 | 6.97151315  | 7.034937983 | 7.546034951 | 7.493116862 |

|             |             |             |             |             |             |
|-------------|-------------|-------------|-------------|-------------|-------------|
| 4.90681358  | 4.859740248 | 5.688540763 | 5.247116524 | 4.24398311  | 5.211906216 |
| 9.30635924  | 9.302117694 | 9.583714109 | 9.495001341 | 9.175515156 | 9.396352465 |
| 9.662586063 | 9.54831326  | 9.863735561 | 9.646090449 | 9.791787904 | 9.396352465 |
| 8.709001691 | 7.212997062 | 3.163111837 | 4.88881432  | 3.278533864 | 3.396272977 |
| 7.013008761 | 7.30941979  | 7.114188451 | 7.316567293 | 7.766220101 | 7.574267058 |
| 8.297598557 | 8.189484574 | 8.574362913 | 8.422715096 | 8.642089768 | 8.446417588 |
| 7.541660341 | 7.334635711 | 7.87165773  | 6.591618726 | 6.986408908 | 7.493116862 |
| 3.772519063 | 5.488120149 | 4.211346654 | 6.591618726 | 5.102469568 | 4.38908158  |
| 6.073168917 | 5.832966557 | 5.639043496 | 4.950067607 | 5.284577982 | 4.927395279 |
| 11.09860766 | 11.06190807 | 11.24634384 | 11.32681754 | 11.24594672 | 11.32549342 |
| 7.568507884 | 7.763881753 | 7.645957589 | 7.103942318 | 7.472846725 | 7.53794543  |
| 9.301032829 | 9.352365703 | 9.372803608 | 9.44134941  | 9.152264008 | 9.194143476 |
| 11.35076467 | 11.42683263 | 11.27041664 | 11.35185804 | 11.61535511 | 11.4808961  |
| 11.1587376  | 10.9602653  | 10.79880028 | 10.91731593 | 10.99463423 | 10.88756503 |
| 8.459349571 | 8.291737315 | 8.338909643 | 8.247754885 | 8.093655154 | 8.271639574 |
| 7.532598976 | 7.521911764 | 7.676944545 | 7.862010013 | 8.141669916 | 8.010471298 |
| 10.75146164 | 10.77388898 | 10.82185818 | 10.60673956 | 10.89776498 | 10.89188856 |
| 8.956051931 | 9.115894203 | 9.336389323 | 9.357640775 | 9.32855653  | 9.426467822 |
| 8.768102187 | 8.670765188 | 8.756560805 | 8.983972632 | 8.905774924 | 8.888525592 |
| 3.502432386 | 3.091832257 | 3.531904981 | 3.95345074  | 3.491138785 | 3.839901004 |
| 8.696885408 | 8.766523646 | 8.626089581 | 8.304559715 | 8.419973731 | 8.374089013 |
| 4.662889011 | 4.812658923 | 5.131284419 | 5.092705987 | 4.966893338 | 5.056252732 |
| 7.892713944 | 7.726267866 | 7.458939189 | 7.345351577 | 7.054878598 | 6.889481478 |
| 8.040664453 | 7.94398412  | 8.567764703 | 8.541904055 | 7.89319835  | 7.967420328 |
| 7.467523966 | 7.745197389 | 7.437384541 | 7.512034842 | 7.615688897 | 7.26325617  |
| 8.215046526 | 8.491796128 | 8.574362913 | 8.571442637 | 8.642089768 | 8.60580491  |
| 10.42653181 | 10.46593957 | 10.68146122 | 10.65984131 | 10.69280069 | 10.60023949 |
| 9.520863716 | 9.601220366 | 9.707431605 | 9.848662602 | 9.94396701  | 10.02323005 |
| 9.5139742   | 9.485908413 | 9.278974808 | 9.239938105 | 9.183183005 | 9.244599678 |
| 8.410722619 | 8.203240119 | 8.221913768 | 8.467918259 | 8.346757901 | 8.563066924 |
| 10.9465802  | 10.89678365 | 11.04788026 | 11.18472809 | 10.98808296 | 10.96757503 |
| 10.47818163 | 10.62087374 | 10.88226774 | 10.93730666 | 10.5324621  | 10.6063913  |
| 11.10702563 | 11.128303   | 11.31295791 | 11.20450157 | 10.79392031 | 10.7177402  |
| 11.08239929 | 11.1095558  | 11.29659052 | 11.23520157 | 11.03438935 | 10.9648415  |
| 11.71602247 | 11.82329132 | 11.85125903 | 11.83468732 | 11.72907103 | 11.60897143 |
| 8.756474188 | 9.002464978 | 9.280993129 | 8.998543355 | 8.991246829 | 8.922733837 |
| 8.565337387 | 8.338191971 | 8.65439098  | 8.066008341 | 8.291074833 | 8.504039254 |
| 7.051580847 | 7.0801504   | 7.494163047 | 6.317223955 | 6.607711868 | 6.731199993 |
| 7.379296842 | 7.30941979  | 7.340070326 | 7.423020174 | 6.986408908 | 7.289710504 |
| 8.999448102 | 8.924337946 | 8.821788126 | 8.486127353 | 8.849061269 | 9.007524455 |
| 9.801087105 | 10.09619127 | 10.09470202 | 10.17478408 | 9.959677954 | 10.08872435 |
| 7.550665149 | 7.521911764 | 7.771854035 | 7.688651093 | 7.939207119 | 8.142125867 |
| 10.44596701 | 10.47068639 | 10.53862261 | 10.38277238 | 10.44268039 | 10.27679369 |
| 9.137335911 | 9.254467168 | 9.219180344 | 8.969253247 | 9.067800766 | 9.235556104 |
| 9.82726037  | 9.801390185 | 9.991251466 | 9.433327829 | 9.711875195 | 9.444239836 |
| 8.04704202  | 8.113820919 | 8.139772847 | 7.745906146 | 8.233156008 | 8.151772472 |
| 9.316953427 | 9.380888646 | 9.328604625 | 9.213639419 | 8.919611705 | 9.057132465 |

|             |             |             |             |             |             |
|-------------|-------------|-------------|-------------|-------------|-------------|
| 8.713017944 | 8.603202297 | 8.838329825 | 8.701815489 | 8.419973731 | 8.340741066 |
| 8.021360831 | 8.304555835 | 8.429037078 | 8.649687119 | 8.305198378 | 7.994477353 |
| 8.492438798 | 8.472993404 | 8.551135932 | 8.77346429  | 7.902518233 | 8.530161518 |
| 7.941454893 | 7.800539838 | 8.38842626  | 7.980514129 | 7.845673852 | 7.609696655 |
| 9.668802671 | 9.76784278  | 10.03136945 | 9.808913979 | 9.719805043 | 9.638574055 |
| 9.585819148 | 9.801390185 | 9.720875749 | 9.823309041 | 9.457454831 | 9.703963379 |
| 5.768104837 | 5.683962973 | 6.279171741 | 5.933284016 | 5.165761148 | 5.653347452 |
| 8.617691446 | 8.495527444 | 8.603687017 | 8.825469202 | 8.658685492 | 8.488897102 |
| 9.119291251 | 9.081551187 | 9.490855367 | 9.148168194 | 8.877696762 | 9.124816969 |
| 8.425483569 | 8.532319243 | 8.641881072 | 8.958114309 | 8.367097167 | 8.426687334 |
| 10.14669842 | 10.19817041 | 10.35538229 | 10.05268361 | 10.16141913 | 10.16215291 |
| 9.554826266 | 9.638821815 | 9.681690132 | 9.875553079 | 9.422249639 | 9.645418699 |
| 8.809953865 | 8.918790663 | 8.672954772 | 8.739169589 | 8.733703782 | 8.931160646 |
| 7.878480057 | 8.32567014  | 8.544430383 | 7.384708481 | 7.300257302 | 7.823956147 |
| 9.378935019 | 9.234510885 | 9.365213452 | 8.387166339 | 9.120667834 | 9.057132465 |
| 9.295686681 | 9.474610016 | 9.489110452 | 9.34201494  | 9.108638559 | 9.251345348 |
| 8.621969722 | 8.582300645 | 8.816231809 | 8.49899456  | 8.247855159 | 8.386398405 |
| 9.819830621 | 9.942022005 | 9.942354603 | 10.00025217 | 9.507175918 | 9.442275944 |
| 11.48599834 | 11.45632926 | 11.57720013 | 11.58635275 | 11.33468506 | 11.42729638 |
| 10.0891474  | 9.89052379  | 10.27766174 | 9.956144031 | 9.598891342 | 9.718641441 |
| 10.83491525 | 10.88545248 | 10.81838816 | 10.60018621 | 10.58983632 | 10.70141174 |
| 9.051126736 | 9.018114129 | 9.457335618 | 9.088124568 | 8.470980627 | 8.862326364 |
| 9.737446714 | 9.749209978 | 9.941078784 | 9.806845766 | 9.422249639 | 9.390253215 |
| 8.857898834 | 8.835861777 | 8.910506402 | 9.036105741 | 8.749283901 | 8.681013841 |
| 10.87041073 | 10.94601899 | 11.17107323 | 11.23635461 | 11.03967861 | 10.86501804 |
| 9.871052844 | 9.810405694 | 9.99985506  | 9.995719984 | 9.838664968 | 9.829479168 |
| 9.791623231 | 9.497119015 | 9.786279071 | 9.366093158 | 9.447938298 | 9.473381844 |
| 9.670868935 | 9.668873993 | 9.167749531 | 9.081296143 | 9.399390606 | 9.484875797 |
| 7.230339378 | 7.423497042 | 7.252268475 | 7.854019723 | 7.776394435 | 7.61667935  |
| 9.998273012 | 8.446250973 | 7.132188663 | 7.537203481 | 7.021049908 | 7.485508114 |
| 6.832808945 | 6.944777693 | 7.210520828 | 7.362350457 | 6.652590701 | 6.978902989 |
| 7.467523966 | 6.866256711 | 7.132188663 | 7.176219313 | 6.412779514 | 7.06310396  |
| 8.215046526 | 8.291737315 | 8.561136177 | 8.549345593 | 8.653174768 | 9.090117879 |
| 6.146276344 | 5.902068469 | 6.709077783 | 6.601197586 | 6.359633686 | 6.053980935 |
| 5.066011601 | 5.07453361  | 5.42209455  | 6.157597281 | 5.636998506 | 6.333687577 |
| 3.169860822 | 4.080322903 | 1           | 1.715872115 | 1           | 1           |
| 11.33781815 | 11.30401477 | 11.49133531 | 11.04826399 | 11.11176153 | 11.29098929 |
| 9.594553327 | 9.761658546 | 9.799011317 | 9.731434539 | 9.909713277 | 9.876779528 |
| 10.82102718 | 10.8625196  | 10.98488898 | 11.1141419  | 11.165975   | 11.01260808 |
| 6.876435835 | 6.81939105  | 7.068180142 | 7.304890828 | 7.395746293 | 7.208846205 |
| 11.11083581 | 11.17500494 | 11.17650446 | 11.40717097 | 11.55013902 | 11.57397231 |
| 9.401508377 | 9.40291051  | 9.695375163 | 9.094920827 | 9.447938298 | 9.603855093 |
| 11.82301935 | 11.96863016 | 11.96013043 | 12.07125301 | 11.99119957 | 11.96035053 |
| 10.31204424 | 10.39878667 | 10.42183026 | 10.57367102 | 10.78512947 | 10.70223256 |
| 11.31883689 | 11.19464833 | 11.18891923 | 11.31885705 | 11.64688995 | 11.31479926 |
| 12.25425724 | 12.34849801 | 12.29001636 | 12.37575419 | 12.59095572 | 12.5153725  |
| 6.904804321 | 6.987799746 | 7.10510342  | 7.328150013 | 7.546034951 | 7.280946181 |

|             |             |             |             |             |             |
|-------------|-------------|-------------|-------------|-------------|-------------|
| 10.6345774  | 10.85890318 | 10.81490978 | 11.03772086 | 10.88371605 | 11.03101919 |
| 12.66621549 | 12.6715529  | 12.78252687 | 12.90367127 | 12.86628949 | 12.90810627 |
| 10.48876194 | 10.42445904 | 10.59892264 | 10.60673956 | 10.71412896 | 10.72502815 |
| 10.44475995 | 10.49232282 | 10.3525061  | 10.53358695 | 10.70616776 | 10.76721498 |
| 9.265923402 | 9.245631771 | 9.178616529 | 9.253669255 | 9.338891113 | 9.310677718 |
| 11.19436663 | 11.25257432 | 11.13414686 | 11.24707216 | 11.33898187 | 11.2550804  |
| 4.849588934 | 5.189564533 | 4.141971765 | 5.171976075 | 4.966893338 | 5.136177653 |
| 2.736907833 | 3.091832257 | 1.520899766 | 1           | 1           | 1           |
| 2.969564903 | 3.615275167 | 1           | 1           | 1.824050315 | 1           |
| 6.464805401 | 6.544747421 | 6.052193643 | 5.963305922 | 5.991624824 | 5.924911051 |
| 6.303700321 | 6.877739053 | 6.446761896 | 6.196032832 | 6.125000019 | 6.012227628 |
| 6.772508497 | 6.866256711 | 7.020656134 | 6.418221226 | 6.561392014 | 6.705230636 |
| 3.999927798 | 1.552010398 | 1.902806559 | 1           | 1           | 1           |
| 8.385780378 | 8.55752638  | 8.425392062 | 8.414588939 | 8.432895514 | 8.240334759 |
| 2.115432786 | 1.950285237 | 2.666415399 | 1.715872115 | 1           | 1.961732649 |
| 4.662889011 | 4.949529988 | 5.16664667  | 6.104703228 | 4.121627621 | 4.452898434 |
| 9.085611536 | 9.132763924 | 9.235924426 | 9.283722952 | 9.382838091 | 9.398379832 |
| 12.90765318 | 12.89741204 | 12.95187201 | 13.01759274 | 13.05989065 | 13.01701334 |
| 11.6320797  | 11.75021138 | 11.45201637 | 11.55219091 | 11.40686431 | 11.61072115 |
| 9.27952833  | 9.394941398 | 9.105333674 | 9.149800917 | 9.152264008 | 9.105091224 |
| 11.28010834 | 11.42193906 | 11.10082808 | 11.01371327 | 10.85400052 | 10.97506564 |
| 13.42622594 | 13.58509355 | 13.38182476 | 12.7096278  | 13.25304655 | 13.38851309 |
| 10.65141781 | 10.62938953 | 10.67303244 | 10.63324297 | 10.84194079 | 10.71367538 |
| 8.918284181 | 8.797080952 | 8.706380146 | 8.350719467 | 8.520245571 | 8.637047535 |
| 10.42285838 | 10.0588506  | 9.924389649 | 9.890278462 | 9.598891342 | 9.836972845 |
| 8.999448102 | 8.991937103 | 9.178616529 | 9.261241576 | 9.463764489 | 9.253586914 |
| 2.115432786 | 2.51828802  | 3.296794681 | 1.715872115 | 1           | 1.559564046 |
| 5.115399462 | 4.49246866  | 4.980472725 | 3.892344006 | 3.491138785 | 3.839901004 |
| 6.386500509 | 6.168303034 | 5.507318447 | 5.247116524 | 4.736161969 | 5.352389568 |
| 1.662934613 | 4.812658923 | 3.419133915 | 4.01207407  | 4.817242336 | 4.57264077  |
| 7.428976411 | 7.317874162 | 7.48718674  | 7.792638854 | 7.546034951 | 7.50821502  |
| 6.772508497 | 6.783214864 | 6.295237616 | 6.439736251 | 5.102469568 | 5.807764794 |
| 7.586132639 | 7.484850142 | 7.068180142 | 7.083585342 | 6.537662192 | 6.651846005 |
| 10.28531983 | 10.34912611 | 10.2766506  | 10.52857565 | 10.57096397 | 10.48094895 |
| 10.04681427 | 10.13498403 | 10.0889533  | 9.939249497 | 10.12206857 | 10.2160212  |
| 6.709577309 | 6.60125042  | 6.835308414 | 6.702569621 | 6.332308105 | 6.463294335 |
| 8.380739763 | 8.189484574 | 7.620679723 | 7.72852998  | 8.085495004 | 8.156571694 |
| 7.981961006 | 8.387219962 | 8.58420399  | 8.169432655 | 7.920979301 | 8.328034138 |
| 7.296069994 | 7.499789234 | 7.860903323 | 7.566837478 | 7.136134658 | 7.630544159 |
| 6.741386012 | 7.129011846 | 7.068180142 | 7.207912435 | 7.120245449 | 7.042509934 |
| 9.006010078 | 8.970648033 | 8.951633604 | 8.96740272  | 8.853873496 | 8.697573484 |
| 11.37124044 | 11.38016423 | 11.46450229 | 11.57576381 | 11.48494015 | 11.5214569  |
| 9.703532918 | 10.02955358 | 10.19551465 | 10.29475027 | 10.03364527 | 10.10246904 |
| 8.794875172 | 8.696928622 | 8.868172288 | 9.232252837 | 8.759577951 | 9.00486565  |
| 9.525438517 | 9.62526168  | 9.644549076 | 9.910644713 | 9.701233803 | 9.750734372 |
| 11.00097384 | 10.97169586 | 10.79739092 | 10.73246297 | 10.25897394 | 10.64361616 |
| 10.0372358  | 10.10232182 | 9.958838383 | 9.700576239 | 9.806756392 | 9.760224671 |

|             |             |             |             |             |             |
|-------------|-------------|-------------|-------------|-------------|-------------|
| 7.81263035  | 6.708021809 | 6.503179644 | 6.407342185 | 6.738365512 | 6.264239129 |
| 5.704976993 | 5.29609709  | 5.871116192 | 5.364258082 | 4.894007383 | 5.352389568 |
| 4.790000379 | 5.546839624 | 4.211346654 | 5.839277342 | 6.156502484 | 4.971638961 |
| 4.790000379 | 5.630667188 | 4.515560603 | 4.5361587   | 3.676399415 | 4.452898434 |
| 10.51775099 | 10.30940139 | 10.37062586 | 10.20729264 | 10.25534131 | 10.36651651 |
| 9.047950492 | 9.23674193  | 9.406473648 | 9.450651897 | 9.250419195 | 9.153908923 |
| 3.999927798 | 4.080322903 | 3.015764765 | 1.973584608 | 2.727313987 | 2.275883944 |
| 5.79866224  | 5.603262322 | 4.719818172 | 4.5361587   | 3.491138785 | 4.252298811 |
| 5.459352853 | 5.395301053 | 5.267812428 | 5.871298359 | 6.18733174  | 5.90223044  |
| 11.05497399 | 10.99032747 | 11.07488792 | 11.12870372 | 11.27852484 | 11.25452092 |
| 2.969564903 | 1.552010398 | 3.163111837 | 3.540664263 | 2.34524792  | 3.520607779 |
| 8.587382921 | 8.640752791 | 8.944011029 | 9.164412865 | 9.128631988 | 9.00486565  |
| 8.748669793 | 8.797080952 | 8.648149585 | 8.883536163 | 8.319184997 | 8.507800089 |
| 7.820097176 | 8.113820919 | 7.805894868 | 8.116978704 | 7.835978159 | 8.062539036 |
| 10.5027494  | 10.62258092 | 10.47392851 | 10.19469338 | 10.05678617 | 10.25234273 |
| 10.85958177 | 10.88189316 | 10.91252645 | 10.95888805 | 10.89192788 | 11.02315746 |
| 8.090912621 | 8.018491097 | 7.828150566 | 7.758802293 | 7.835978159 | 7.657880332 |
| 8.587382921 | 8.741603072 | 8.88949462  | 8.903029363 | 8.915014174 | 8.911420975 |
| 8.420580014 | 8.415068601 | 8.209251049 | 8.220046188 | 8.619660932 | 8.340741066 |
| 3.999927798 | 4.157717108 | 2.453859607 | 4.495645642 | 4.24398311  | 2.942211478 |
| 10.79663321 | 10.95282049 | 10.93833218 | 11.03727989 | 11.08335907 | 10.94902239 |
| 7.878480057 | 7.954866467 | 7.713271195 | 7.706511268 | 7.434811497 | 7.894601021 |
| 6.539078069 | 6.783214864 | 6.033160362 | 6.077510738 | 5.680989096 | 5.807764794 |
| 7.038837728 | 7.019244738 | 6.744614044 | 7.21416836  | 6.986408908 | 6.866232415 |
| 8.375681475 | 8.553952214 | 8.183587225 | 8.103561713 | 8.069034919 | 8.25383437  |
| 5.115399462 | 5.329928717 | 2.666415399 | 3.458731245 | 2.34524792  | 2.275883944 |
| 7.820097176 | 7.334635711 | 6.961480435 | 6.98459283  | 6.359633686 | 6.638185375 |
| 8.449754417 | 7.818525399 | 7.347793566 | 7.439133061 | 7.557879992 | 7.280946181 |
| 9.311666058 | 9.424601271 | 9.274929675 | 9.011173128 | 8.839388391 | 9.102606434 |
| 8.872336214 | 8.873627371 | 8.77958457  | 9.098306987 | 8.928763044 | 8.805403265 |
| 8.676462695 | 8.735305083 | 9.047227566 | 9.227621948 | 8.973668744 | 9.057132465 |
| 8.630488399 | 8.517714921 | 8.724290942 | 8.686148779 | 8.585350016 | 8.584594168 |
| 10.01950837 | 9.978474547 | 9.947446624 | 10.13577046 | 10.10803832 | 10.04280363 |
| 7.477002047 | 7.565164426 | 7.707279919 | 7.444464279 | 7.534091853 | 7.357971872 |
| 8.44009502  | 8.450101804 | 8.287632913 | 7.877859046 | 8.009899129 | 8.328034138 |
| 2.459379109 | 1.950285237 | 2.204484772 | 3.074635247 | 2.34524792  | 3.396272977 |
| 8.771957453 | 8.53594734  | 8.709380763 | 8.268944084 | 8.305198378 | 8.258306314 |
| 8.638957071 | 8.706618864 | 8.802246666 | 8.516818003 | 8.591125469 | 8.588151019 |
| 10.98196043 | 11.12890372 | 11.15520605 | 11.22594388 | 11.24411507 | 11.26010603 |
| 6.890689805 | 6.682060594 | 6.910242852 | 6.755001139 | 6.125000019 | 6.264239129 |
| 8.090912621 | 7.579298539 | 7.766101646 | 7.220397274 | 7.485305515 | 7.530570068 |
| 8.655746724 | 8.757228803 | 8.580931084 | 8.381618711 | 8.585350016 | 8.774516565 |
| 5.768104837 | 6.485940968 | 5.849518442 | 5.171976075 | 4.817242336 | 5.783149234 |
| 6.847498316 | 6.807432831 | 6.107831707 | 6.208620451 | 5.036273452 | 5.855770664 |
| 7.981961006 | 7.60715801  | 7.719237693 | 7.287197001 | 7.864871919 | 7.272128289 |
| 5.768104837 | 5.709890283 | 5.56146006  | 5.451571397 | 5.765139818 | 5.625924432 |
| 7.101456712 | 7.800539838 | 7.633374018 | 7.591075821 | 7.120245449 | 7.72403707  |

|             |             |             |             |             |             |
|-------------|-------------|-------------|-------------|-------------|-------------|
| 7.878480057 | 8.23036389  | 8.126364789 | 7.750217683 | 7.682134238 | 7.53794543  |
| 5.942434672 | 5.657561172 | 5.331518423 | 5.933284016 | 5.165761148 | 4.514011558 |
| 7.568507884 | 7.275097979 | 7.039854002 | 6.492160594 | 6.759035418 | 6.567871871 |
| 10.49227154 | 10.00489476 | 9.195835242 | 9.162796604 | 9.314660909 | 9.23101297  |
| 8.072274046 | 8.079427921 | 7.877005019 | 8.156496876 | 8.240524304 | 8.26276444  |
| 6.282235843 | 5.603262322 | 5.267812428 | 5.092705987 | 4.356767986 | 5.248330196 |
| 8.506390823 | 8.763432014 | 8.554477055 | 8.683896724 | 8.707357082 | 8.720442227 |
| 10.27856066 | 10.38678203 | 10.38101316 | 10.36741783 | 10.36895702 | 10.33086957 |
| 10.04681427 | 10.02051771 | 10.24184323 | 10.43123962 | 10.26078683 | 10.20795248 |
| 1.662934613 | 9.80740678  | 9.681690132 | 1           | 1           | 9.544676631 |
| 9.751182764 | 9.230038416 | 9.380354041 | 9.766975659 | 9.886417123 | 9.323537758 |
| 9.190153994 | 9.186843813 | 9.367114738 | 9.253669255 | 9.698561146 | 9.669122415 |
| 9.888914523 | 9.869110915 | 10.01812035 | 10.13081873 | 10.114068   | 9.998049412 |
| 12.63135985 | 12.70477062 | 12.61942627 | 12.50383911 | 12.58807054 | 12.6300212  |
| 10.19487963 | 10.20502329 | 10.37346619 | 10.51407046 | 10.34864414 | 10.35820789 |
| 9.041576948 | 9.252263386 | 9.469775791 | 9.630972755 | 9.537403314 | 9.5354946   |
| 8.034258568 | 7.876907723 | 8.057389097 | 8.327824196 | 8.21830555  | 8.146957232 |
| 8.454559971 | 8.657503365 | 8.75945895  | 8.75641884  | 8.483455474 | 8.496488044 |
| 11.30360318 | 11.50109833 | 11.50305473 | 11.60253902 | 11.73168781 | 11.57800267 |
| 11.97289731 | 12.0377542  | 12.18480191 | 12.08625195 | 12.19693697 | 12.19857908 |
| 8.270602683 | 7.899614806 | 8.251034929 | 8.473144351 | 8.298153888 | 8.310915573 |
| 8.651567593 | 8.70339601  | 8.905282076 | 9.088124568 | 8.858669725 | 9.082572523 |
| 9.637448242 | 9.539303655 | 9.326651869 | 9.083006282 | 9.2721525   | 9.344719651 |
| 6.817968469 | 6.60125042  | 6.489280693 | 6.196032832 | 5.340507563 | 6.012227628 |
| 9.79919929  | 9.915806654 | 10.03973777 | 10.0570406  | 10.08571136 | 10.12835075 |
| 8.163148408 | 8.383197337 | 8.603687017 | 8.663468455 | 8.373813697 | 8.507800089 |
| 9.319589863 | 9.314844719 | 9.268840629 | 9.161178531 | 9.279324784 | 9.38412807  |
| 6.890689805 | 7.292360947 | 7.458939189 | 7.055988027 | 7.314291673 | 7.545283279 |
| 8.444932803 | 8.054349618 | 7.892928988 | 7.82160853  | 8.133777608 | 8.06764393  |
| 9.088706025 | 8.870757166 | 8.830082684 | 8.521870231 | 9.084274859 | 9.092624253 |
| 11.33586611 | 11.39122271 | 11.34418102 | 11.40169988 | 11.5441968  | 11.42878491 |
| 9.701512943 | 9.85755942  | 9.866426405 | 9.959871655 | 9.905084043 | 9.97785478  |
| 8.883070219 | 8.97332641  | 9.05903752  | 8.65199317  | 8.738915872 | 8.670986043 |
| 6.047952674 | 6.223342662 | 5.782714705 | 6.385334855 | 5.723677922 | 5.706677567 |
| 8.459349571 | 8.399220977 | 8.166220822 | 8.048610037 | 7.883817868 | 8.041936887 |
| 7.849583926 | 8.094268286 | 8.365783424 | 7.758802293 | 7.864871919 | 7.888844291 |
| 11.50175473 | 11.56152904 | 11.70784466 | 11.7302513  | 11.65587314 | 11.77460498 |
| 11.25691245 | 11.23817021 | 11.45112037 | 11.3436783  | 11.48958577 | 11.44162164 |
| 10.94401953 | 10.93025276 | 11.05202288 | 11.14966267 | 11.27134857 | 11.22968625 |
| 8.292239643 | 8.166263138 | 8.062091503 | 7.780042959 | 7.957207506 | 8.226707636 |
| 8.103205892 | 8.274466839 | 8.234466311 | 8.647377376 | 8.764697562 | 8.5264586   |
| 8.664068842 | 8.794054183 | 9.107609938 | 9.172467118 | 8.964798728 | 8.905731103 |
| 9.460032269 | 9.430460769 | 9.617650046 | 9.213639419 | 9.593146956 | 9.465668019 |
| 9.872848996 | 9.978474547 | 9.871793083 | 10.14234643 | 10.13200729 | 9.995373071 |
| 9.520863716 | 9.526594928 | 9.540561131 | 9.66676451  | 9.687820726 | 9.786779705 |
| 11.67697645 | 11.83806127 | 11.84785909 | 11.81527094 | 11.85742031 | 11.85946912 |
| 9.953144081 | 10.01662781 | 9.993714875 | 10.06830756 | 10.28771032 | 10.10122492 |



|             |             |             |             |             |             |
|-------------|-------------|-------------|-------------|-------------|-------------|
| 9.376404926 | 9.54831326  | 9.402771103 | 9.565200239 | 9.706564311 | 9.537335687 |
| 5.768104837 | 3.911841602 | 4.401452511 | 3.074635247 | 2.727313987 | 3.396272977 |
| 11.07539671 | 11.12047091 | 11.14471488 | 10.86807762 | 11.0966155  | 11.14286767 |
| 8.001795415 | 7.65465389  | 7.898198157 | 7.439133061 | 7.447601649 | 7.477859025 |
| 8.996155888 | 9.113468058 | 9.287031206 | 9.408991955 | 9.261326772 | 9.189467826 |
| 8.626235348 | 8.450101804 | 7.844619889 | 7.931998417 | 7.497657635 | 7.749673067 |
| 9.596728635 | 9.57853177  | 8.724290942 | 8.869732495 | 8.419973731 | 8.670986043 |
| 9.776350704 | 9.766299205 | 9.248356177 | 9.258217415 | 9.175515156 | 9.210389939 |
| 9.12533125  | 8.812120274 | 8.93378454  | 8.903029363 | 8.360349222 | 8.710685691 |
| 7.137763686 | 7.469754736 | 7.494163047 | 7.449775869 | 6.986408908 | 7.280946181 |
| 7.98860282  | 7.593295521 | 7.924259142 | 7.412177396 | 7.104179293 | 7.530570068 |
| 9.204488908 | 8.910429538 | 9.086993102 | 8.590804292 | 8.658685492 | 8.64731318  |
| 7.495773425 | 7.558045101 | 7.284818032 | 7.232774998 | 6.877196886 | 6.692068528 |
| 5.704976993 | 5.07453361  | 5.16664667  | 5.247116524 | 5.991624824 | 5.417813565 |
| 8.059713194 | 8.028827657 | 8.121867602 | 8.274941416 | 8.180496531 | 8.450331464 |
| 9.04476724  | 9.149438663 | 9.09160015  | 9.222976146 | 9.063652681 | 8.876940188 |
| 4.369159279 | 4.99241264  | 4.719818172 | 5.592703924 | 5.226392402 | 5.783149234 |
| 8.861521747 | 9.130366008 | 9.235924426 | 9.32766126  | 9.300630146 | 9.317122067 |
| 9.845669048 | 9.802896688 | 9.77772805  | 10.00025217 | 10.06510985 | 9.994033037 |
| 10.17609078 | 10.33044542 | 10.33997593 | 10.17638697 | 9.957443981 | 10.11485159 |
| 8.237526361 | 8.261376937 | 8.230294254 | 8.462673167 | 8.28396087  | 8.235806672 |
| 8.524786085 | 8.553952214 | 8.414401433 | 8.788215622 | 8.749283901 | 8.723679798 |
| 7.296069994 | 5.924385992 | 3.296794681 | 2.835884957 | 1.824050315 | 2.275883944 |
| 1           | 1           | 2.666415399 | 2.192163608 | 1.824050315 | 1           |
| 5.604782933 | 5.26145301  | 5.234872487 | 5.037331193 | 4.966893338 | 5.385472394 |
| 8.186445019 | 8.391231403 | 8.323325409 | 8.020328823 | 8.069034919 | 8.031524424 |
| 6.862039628 | 7.203903194 | 5.934034702 | 5.963305922 | 5.882822178 | 5.969229824 |
| 7.827525556 | 7.871174666 | 8.033644375 | 7.976839529 | 7.271772222 | 7.877261457 |
| 8.713017944 | 8.104077727 | 7.771854035 | 7.638364019 | 7.472846725 | 7.272128289 |
| 4.101465124 | 2.262061444 | 3.015764765 | 1.973584608 | 1           | 1.559564046 |
| 7.892713944 | 8.002846057 | 7.652208453 | 7.351040154 | 7.087932204 | 7.530570068 |
| 8.752577268 | 8.532319243 | 7.924259142 | 7.8580204   | 7.930121997 | 7.717556254 |
| 5.066011601 | 5.735359855 | 5.362346647 | 4.857183992 | 5.544776471 | 5.625924432 |
| 9.753134424 | 9.71120651  | 9.962615734 | 10.08461798 | 10.20350003 | 9.97785478  |
| 9.343103453 | 9.640507905 | 9.71789897  | 9.791238933 | 10.14187801 | 9.73798274  |
| 9.221504881 | 9.103722474 | 8.392165755 | 8.526904828 | 8.42644909  | 8.566677179 |
| 7.505068311 | 7.317874162 | 7.601426359 | 7.873913081 | 7.615688897 | 7.811838214 |
| 7.025981046 | 7.399799845 | 7.068180142 | 6.581975842 | 6.584737829 | 6.794149027 |
| 10.82195722 | 10.89960259 | 10.80302013 | 10.87401645 | 11.16983945 | 10.97845764 |
| 5.420583385 | 5.784988506 | 5.892395377 | 5.806529446 | 5.591624257 | 5.783149234 |
| 9.958228687 | 10.09741947 | 10.3007245  | 10.26040077 | 10.05260625 | 10.05184787 |
| 10.65037102 | 10.6695799  | 10.87760701 | 10.89995775 | 10.85159662 | 10.93022807 |
| 7.064212394 | 7.019244738 | 6.97151315  | 6.780519224 | 6.738365512 | 6.842602549 |
| 8.802434218 | 8.803115507 | 8.821788126 | 8.752125824 | 8.800034994 | 8.859385751 |
| 6.709577309 | 6.241232271 | 5.451065511 | 5.822996311 | 5.446254265 | 5.597970034 |
| 9.391519352 | 9.663908568 | 9.586980714 | 9.774403425 | 9.907400517 | 9.827975751 |
| 9.874642915 | 10.01142489 | 9.968889425 | 9.54920585  | 9.630083016 | 9.949098803 |

|             |             |             |             |             |             |
|-------------|-------------|-------------|-------------|-------------|-------------|
| 6.366241698 | 6.720829303 | 7.068180142 | 7.055988027 | 6.464036922 | 7.042509934 |
| 7.207746394 | 6.500868827 | 6.178827647 | 5.472598337 | 5.882822178 | 4.785889718 |
| 8.169007924 | 7.976387957 | 7.67080017  | 7.537203481 | 7.626977818 | 7.470169165 |
| 6.677051441 | 6.500868827 | 6.744614044 | 6.838362687 | 6.696115476 | 6.76929803  |
| 9.163986653 | 9.088979539 | 9.118937696 | 9.408991955 | 9.485633481 | 9.60736483  |
| 9.143300989 | 9.043824638 | 9.11215172  | 8.764966739 | 8.613998814 | 8.814541786 |
| 12.68856851 | 12.6541312  | 12.66457367 | 12.52349355 | 12.44431883 | 12.57506823 |
| 8.350120538 | 8.539566335 | 8.450715868 | 8.143444059 | 8.291074833 | 7.945403307 |
| 9.63321569  | 9.630361678 | 9.882466917 | 9.913530849 | 9.668830415 | 9.841450438 |
| 8.059713194 | 7.842162587 | 7.614290442 | 7.792638854 | 7.920979301 | 7.841944312 |
| 10.7689289  | 10.98170699 | 11.09223308 | 11.04475817 | 11.23676514 | 11.13255231 |
| 9.238322496 | 9.096369839 | 9.082371295 | 8.723905439 | 8.92419463  | 8.945096862 |
| 7.369152291 | 7.484850142 | 7.984949345 | 7.263262524 | 7.460279405 | 7.39905121  |
| 6.693406036 | 5.809176966 | 5.16664667  | 5.065284254 | 3.491138785 | 5.174538761 |
| 4.523486615 | 5.395301053 | 5.300017035 | 4.88881432  | 4.461371462 | 3.741118641 |
| 10.01137787 | 10.13856794 | 10.26139783 | 9.878510204 | 10.29480587 | 10.11608402 |
| 7.550665149 | 7.469754736 | 7.683062863 | 7.232774998 | 8.262406054 | 7.545283279 |
| 7.230339378 | 7.119371049 | 7.158774763 | 6.854472186 | 7.003833377 | 7.042509934 |
| 7.834915884 | 7.499789234 | 7.633374018 | 7.517103819 | 7.745653611 | 7.523156808 |
| 8.928682918 | 8.809124926 | 8.663702735 | 8.624074255 | 8.495823376 | 8.742954118 |
| 6.725569324 | 6.587330775 | 7.020656134 | 6.924818429 | 7.460279405 | 7.298421905 |
| 8.949258199 | 8.864999567 | 9.006334815 | 9.276268017 | 9.275743099 | 9.11252002  |
| 7.409309391 | 7.593295521 | 7.581912571 | 7.862010013 | 7.796530343 | 7.787292651 |
| 8.775802444 | 8.23036389  | 7.892928988 | 7.833848215 | 7.883817868 | 7.609696655 |
| 10.84226792 | 10.7914491  | 10.73250086 | 10.89558537 | 11.04915068 | 11.05177672 |
| 7.941454893 | 8.044194949 | 7.218967562 | 7.423020174 | 7.182778534 | 7.161882536 |
| 9.572617927 | 9.668873993 | 9.575515089 | 9.732524507 | 9.725067497 | 9.841450438 |
| 8.48306192  | 8.194084344 | 8.174930154 | 8.079777479 | 8.470980627 | 8.36167369  |
| 7.051580847 | 7.239939711 | 6.857118337 | 7.566837478 | 7.42190694  | 7.415160931 |
| 4.196323698 | 4.36772701  | 5.019679186 | 4.575565097 | 5.680989096 | 4.735459195 |
| 4.448385543 | 5.879400277 | 4.766663576 | 5.222502    | 6.125000019 | 5.807764794 |
| 8.103205892 | 8.069448851 | 8.447125283 | 8.166209568 | 7.569628571 | 7.877261457 |
| 7.703821849 | 7.593295521 | 7.701263658 | 7.143814288 | 7.167397529 | 7.485508114 |
| 7.34864665  | 7.719902426 | 7.882332562 | 8.140162318 | 8.2108226   | 7.811838214 |
| 10.53373398 | 10.27724837 | 10.12310693 | 9.923109814 | 9.912022336 | 9.925392908 |
| 7.920767218 | 7.81255509  | 8.117356351 | 8.096806134 | 8.353569567 | 8.146957232 |
| 16.78980132 | 16.82108009 | 16.70889582 | 16.81990523 | 16.89142005 | 16.92973578 |
| 7.612172519 | 7.529211193 | 7.74870557  | 7.476044383 | 7.341957365 | 7.341206929 |
| 8.180656039 | 8.064433312 | 8.27148165  | 8.31914392  | 8.035540411 | 8.142125867 |
| 8.764236591 | 8.706618864 | 8.799433296 | 8.457408935 | 8.247855159 | 8.442493064 |
| 14.87910983 | 14.96089043 | 14.96044146 | 15.02446897 | 15.10884119 | 15.11641408 |
| 13.11194969 | 13.21028113 | 13.16153294 | 13.23967993 | 13.35775967 | 13.30816504 |
| 6.238324409 | 6.186883866 | 6.388047781 | 6.317223955 | 6.276053451 | 5.831967395 |
| 9.24110647  | 9.252263386 | 9.040094909 | 9.048412306 | 9.152264008 | 9.087607143 |
| 7.856862399 | 7.732605344 | 7.898198157 | 7.920566934 | 8.262406054 | 7.697937279 |
| 8.270602683 | 8.48430442  | 8.721321208 | 8.692883926 | 8.790026597 | 8.742954118 |
| 6.520865289 | 6.655623635 | 5.664004394 | 5.451571397 | 5.226392402 | 5.625924432 |

|             |             |             |             |             |             |
|-------------|-------------|-------------|-------------|-------------|-------------|
| 9.971700673 | 9.986451536 | 10.06338323 | 10.1133526  | 10.22780105 | 10.06722159 |
| 4.196323698 | 2.735797961 | 1.520899766 | 1.715872115 | 1           | 1.559564046 |
| 12.12382336 | 12.1635744  | 12.24549148 | 12.27910717 | 12.25402484 | 12.31905688 |
| 6.693406036 | 6.223342662 | 5.019679186 | 5.065284254 | 4.894007383 | 5.625924432 |
| 9.647975615 | 9.626963683 | 9.455549661 | 9.3883937   | 9.743336374 | 9.692442962 |
| 9.757029842 | 9.832701022 | 9.988783843 | 9.999346869 | 10.14384408 | 10.07738047 |
| 10.50853772 | 10.54997807 | 10.73471155 | 10.80833882 | 10.82120501 | 10.71123098 |
| 8.802434218 | 9.071586844 | 8.97426262  | 8.950640282 | 8.819845872 | 8.956149711 |
| 10.45917844 | 10.35735162 | 10.38289375 | 10.49557095 | 10.56216969 | 10.54274363 |
| 9.67705003  | 9.657261305 | 9.532112433 | 9.540519472 | 9.884066683 | 9.760224671 |
| 12.14515977 | 12.08588367 | 12.00416856 | 11.80960129 | 12.05736297 | 12.12120841 |
| 11.2975981  | 11.25587802 | 11.38650717 | 11.31267554 | 11.28388371 | 11.28716484 |
| 8.157264997 | 8.300295637 | 7.924259142 | 7.72415304  | 7.864871919 | 7.711046195 |
| 12.56597155 | 12.54853388 | 12.58594079 | 12.79739899 | 12.73615868 | 12.68399673 |
| 7.125762598 | 5.760387573 | 5.507318447 | 5.992715799 | 5.882822178 | 5.706677567 |
| 9.583627316 | 9.526594928 | 9.527019362 | 9.562751076 | 9.615988526 | 9.440309376 |
| 7.389370557 | 6.966449082 | 7.149967054 | 7.792638854 | 7.087932204 | 7.697937279 |
| 7.906808767 | 6.733524099 | 1           | 1           | 1.824050315 | 1           |
| 7.125762598 | 6.733524099 | 5.892395377 | 5.738715534 | 6.18733174  | 4.881751715 |
| 3.169860822 | 3.998540311 | 1           | 1.715872115 | 1           | 1           |
| 6.946337782 | 5.457839158 | 1.520899766 | 1           | 1           | 1           |
| 12.53992443 | 12.55301699 | 12.45329229 | 12.52475243 | 12.73420262 | 12.59022387 |
| 7.428976411 | 7.499789234 | 7.340070326 | 7.506947992 | 7.966124173 | 8.026289875 |
| 7.467523966 | 7.203903194 | 6.857118337 | 6.492160594 | 6.986408908 | 6.638185375 |
| 6.890689805 | 6.327496784 | 6.052193643 | 6.572268072 | 6.696115476 | 6.596409802 |
| 10.34606194 | 10.24103219 | 10.29374435 | 10.41231976 | 10.53994654 | 10.53999147 |
| 8.090912621 | 8.147413064 | 8.183587225 | 8.204419361 | 8.291074833 | 8.082851118 |
| 4.90681358  | 4.905333542 | 4.277538014 | 3.371863457 | 5.446254265 | 4.322310646 |
| 1.662934613 | 2.924770305 | 2.666415399 | 1.40189026  | 1           | 1.961732649 |
| 9.009279907 | 8.809124926 | 9.107609938 | 9.215199743 | 9.096508139 | 9.085092029 |
| 9.254946324 | 9.106165049 | 9.382235491 | 9.410354771 | 9.246764932 | 9.278016976 |
| 9.874642915 | 10.05506282 | 10.13207964 | 10.05355606 | 10.30713971 | 10.20100033 |
| 9.227132564 | 9.250056233 | 9.553976973 | 9.487273378 | 9.513272276 | 9.291170133 |
| 8.360399321 | 8.517714921 | 8.517292103 | 8.038069443 | 8.400371424 | 8.465881647 |
| 9.520863716 | 9.18453419  | 9.419358232 | 9.305859371 | 9.50105369  | 9.484875797 |
| 9.363687473 | 9.223303608 | 9.195835242 | 9.226075009 | 9.425485847 | 9.187124306 |
| 9.107134858 | 9.137547834 | 9.374694924 | 9.282235044 | 9.454289623 | 9.440309376 |
| 9.745311892 | 9.777069709 | 9.780584026 | 9.897099207 | 9.84109049  | 9.863632295 |
| 11.3597586  | 11.29921936 | 11.25201401 | 11.33078137 | 11.29099805 | 11.3376945  |
| 9.854786045 | 10.02051771 | 10.1728676  | 10.28809376 | 10.19972481 | 10.1173154  |
| 1.662934613 | 2.51828802  | 3.163111837 | 3.371863457 | 1.824050315 | 3.260203441 |
| 9.271380779 | 9.125558184 | 8.969264535 | 8.950640282 | 9.352556397 | 9.182425815 |
| 13.04939739 | 12.92292194 | 12.83412715 | 12.76234173 | 13.09028438 | 13.07424941 |
| 7.766999166 | 8.239292997 | 8.373370591 | 7.980514129 | 8.109838281 | 8.328034138 |
| 7.797579751 | 7.965667343 | 7.970014462 | 7.333906686 | 7.054878598 | 7.33275083  |
| 10.35251284 | 10.27941434 | 10.43457902 | 10.15459617 | 10.02939766 | 10.15976456 |
| 7.541660341 | 7.776204901 | 7.877005019 | 8.013171037 | 8.233156008 | 7.883064498 |

|             |             |             |             |             |             |
|-------------|-------------|-------------|-------------|-------------|-------------|
| 7.586132639 | 7.399799845 | 7.444605265 | 6.969879803 | 7.227961475 | 6.678785233 |
| 7.457983205 | 7.865418737 | 7.97998821  | 7.36797253  | 7.434811497 | 7.374544233 |
| 11.17484324 | 11.11865745 | 11.42169322 | 11.38446776 | 11.38209354 | 11.47562486 |
| 10.12576156 | 10.18205261 | 10.19872112 | 10.21198914 | 10.39395242 | 10.40433344 |
| 9.350856918 | 9.569709488 | 9.619246302 | 9.396668327 | 9.409231718 | 9.416499056 |
| 5.380743228 | 5.832966557 | 6.143766352 | 4.651288752 | 4.736161969 | 5.449445606 |
| 8.318837345 | 8.212338154 | 7.800276882 | 7.423020174 | 7.911778296 | 8.026289875 |
| 8.157264997 | 8.028827657 | 8.221913768 | 8.226249831 | 8.319184997 | 8.142125867 |
| 5.115399462 | 5.426908942 | 5.201162845 | 5.146033669 | 4.356767986 | 5.056252732 |
| 2.969564903 | 3.377164271 | 3.63649658  | 3.828534121 | 3.84055471  | 1.961732649 |
| 5.736886172 | 6.186883866 | 5.16664667  | 4.453961963 | 5.340507563 | 5.283857174 |
| 3.643786876 | 2.262061444 | 3.015764765 | 3.074635247 | 2.34524792  | 3.260203441 |
| 5.115399462 | 3.819597725 | 2.204484772 | 2.192163608 | 2.34524792  | 1           |
| 6.146276344 | 6.344147548 | 5.759741239 | 5.6117842   | 5.340507563 | 4.971638961 |
| 5.115399462 | 4.763989148 | 1.902806559 | 2.38194199  | 2.34524792  | 1.961732649 |
| 13.26716749 | 13.39529346 | 13.65640499 | 13.65224505 | 13.58548737 | 13.56290593 |
| 8.756474188 | 8.719438764 | 8.785283554 | 8.414588939 | 8.400371424 | 8.548534875 |
| 10.07048586 | 9.987776756 | 10.18477467 | 10.11669583 | 10.27341368 | 10.32021533 |
| 9.076288041 | 8.902019674 | 8.685199243 | 8.954382136 | 9.012922468 | 8.783852204 |
| 9.624713149 | 9.698312919 | 9.568922158 | 9.0915267   | 9.463764489 | 9.41449701  |
| 2.969564903 | 2.735797961 | 3.015764765 | 4.453961963 | 3.491138785 | 4.101176152 |
| 2.115432786 | 1.950285237 | 2.666415399 | 2.835884957 | 2.34524792  | 1.961732649 |
| 2.459379109 | 3.241540814 | 2.453859607 | 3.828534121 | 4.650252065 | 4.38908158  |
| 2.459379109 | 1.552010398 | 1.520899766 | 1.40189026  | 3.029091357 | 1.961732649 |
| 3.169860822 | 3.241540814 | 1.520899766 | 1.973584608 | 2.34524792  | 1.961732649 |
| 4.196323698 | 3.615275167 | 3.63649658  | 2.699847117 | 1.824050315 | 2.533710429 |
| 2.459379109 | 1.552010398 | 2.204484772 | 1.715872115 | 1.824050315 | 2.752371363 |
| 1.662934613 | 1.950285237 | 2.204484772 | 2.835884957 | 1.824050315 | 1.559564046 |
|             | 1           | 1           | 1.973584608 | 2.727313987 | 2.275883944 |
|             | 1           | 1           | 1.715872115 | 2.34524792  | 3.396272977 |
| 8.664068842 | 8.499249134 | 8.700360124 | 8.857794742 | 8.7441092   | 8.919913927 |
| 12.12608422 | 12.29944741 | 12.34820536 | 12.62117969 | 12.56220856 | 12.55680491 |
| 8.748669793 | 8.564648259 | 8.824558281 | 8.845757383 | 8.882414569 | 8.802344182 |
| 9.175675216 | 9.299985565 | 8.93378454  | 9.065812981 | 8.95587384  | 9.20112866  |
| 8.226330227 | 8.064433312 | 8.27148165  | 7.845984932 | 8.001249753 | 8.132414325 |
| 7.438710287 | 6.66890267  | 5.331518423 | 5.978085801 | 5.805443346 | 5.569463256 |
| 9.290320647 | 9.225552039 | 9.272902847 | 9.373099178 | 9.457454831 | 9.442275944 |
| 8.425483569 | 7.375706898 | 6.647833469 | 6.581975842 | 6.026142292 | 6.333687577 |
| 8.854266801 | 8.932619082 | 8.956693037 | 8.683896724 | 8.298153888 | 8.704144484 |
| 2.459379109 | 2.924770305 | 1.902806559 | 3.540664263 | 3.676399415 | 4.019231643 |
| 6.802973746 | 6.408892928 | 6.229871925 | 7.163344514 | 6.67451722  | 6.756710141 |
| 6.238324409 | 6.3106516   | 6.5440907   | 7.034937983 | 7.104179293 | 6.651846005 |
| 6.146276344 | 6.13040766  | 5.871116192 | 5.037331193 | 6.026142292 | 5.90223044  |
| 6.097951976 | 4.905333542 | 3.992332924 | 3.761770816 | 4.24398311  | 3.109951065 |
| 7.620749071 | 7.499789234 | 7.67080017  | 7.156863771 | 6.914527064 | 7.083408146 |
| 10.34606194 | 10.57928328 | 10.48447651 | 10.55160834 | 10.58550302 | 10.50936597 |
| 9.232738379 | 9.028453381 | 9.233842012 | 9.36889965  | 9.531408289 | 9.194143476 |

|             |             |             |             |             |             |
|-------------|-------------|-------------|-------------|-------------|-------------|
| 9.481380814 | 9.500836607 | 9.56229896  | 9.360463742 | 9.179354175 | 9.260290791 |
| 9.152202616 | 9.111037827 | 9.240080257 | 8.764966739 | 9.250419195 | 8.97529075  |
| 9.467183609 | 9.207465702 | 9.6877884   | 9.734701975 | 9.555240353 | 9.635139517 |
| 3.772519063 | 4.949529988 | 1           | 1           | 1.824050315 | 1.559564046 |
| 8.515617773 | 8.180240803 | 7.903448152 | 8.002367329 | 7.581282249 | 7.787292651 |
| 7.703821849 | 7.579298539 | 7.535326966 | 7.633704343 | 7.626977818 | 7.493116862 |
| 8.027824113 | 8.044194949 | 7.970014462 | 7.591075821 | 7.592842545 | 7.289710504 |
| 6.986708928 | 7.157553616 | 6.92063698  | 6.805593785 | 6.304454951 | 6.153365028 |
| 6.626844947 | 6.071630228 | 6.311126551 | 6.221099191 | 5.544776471 | 6.431967789 |
| 7.161470457 | 6.831250963 | 6.961480435 | 7.020732029 | 6.759035418 | 6.638185375 |
| 7.137763686 | 6.440207626 | 7.001199353 | 6.552654337 | 6.513535519 | 6.367197082 |
| 8.390803443 | 8.156868887 | 8.085376332 | 7.924387501 | 7.755973504 | 7.877261457 |
| 7.296069994 | 7.050018949 | 7.184879784 | 6.999157322 | 7.003833377 | 6.889481478 |
| 8.986233927 | 8.924337946 | 9.404623563 | 9.44401339  | 9.558191869 | 9.484875797 |
| 11.08627497 | 11.13070435 | 11.05497463 | 11.2961837  | 11.25051569 | 11.21710674 |
| 9.481380814 | 9.618433516 | 9.669415715 | 9.836548484 | 9.657865511 | 9.723501129 |
| 8.560887566 | 8.457772767 | 8.622910435 | 8.781912082 | 8.834527523 | 8.515292476 |
| 10.16587143 | 10.1132916  | 10.16414577 | 10.22366393 | 10.27341368 | 10.297582   |
| 7.662883311 | 7.818525399 | 7.562131219 | 7.71976278  | 8.077288436 | 8.112792892 |
| 7.620749071 | 7.600243416 | 7.466053097 | 7.647638464 | 7.89319835  | 7.559847953 |
| 10.71587957 | 10.74987766 | 10.70645604 | 10.49042562 | 10.51281886 | 10.5242959  |
| 10.27313043 | 10.27941434 | 10.25627753 | 10.37092188 | 10.55922631 | 10.37477755 |
| 6.918782085 | 6.877739053 | 7.132188663 | 6.572268072 | 6.986408908 | 6.678785233 |
| 7.409309391 | 7.738915105 | 7.67080017  | 7.70206691  | 7.534091853 | 7.768605476 |
| 10.55066438 | 10.34292605 | 10.50361645 | 10.14807592 | 10.35204955 | 10.33405056 |
| 6.122316484 | 6.544747421 | 6.279171741 | 6.711441605 | 5.284577982 | 6.20986693  |
| 7.34864665  | 7.099894    | 7.030287001 | 7.656853669 | 7.257315961 | 7.073291772 |
| 5.828585816 | 6.944777693 | 7.039854002 | 6.969879803 | 7.038063404 | 7.052843694 |
| 12.50965129 | 12.47153063 | 12.4429637  | 12.32064964 | 12.37026153 | 12.34976432 |
| 7.654554331 | 7.326279279 | 7.620679723 | 6.955015182 | 6.932836069 | 7.245346553 |
| 12.13808264 | 12.1804784  | 12.18856993 | 12.19442862 | 12.29175275 | 12.23901817 |
| 6.238324409 | 4.713619986 | 4.569399469 | 4.791763656 | 4.650252065 | 4.101176152 |
| 6.66050932  | 3.615275167 | 4.141971765 | 3.618193167 | 3.029091357 | 3.396272977 |
| 8.008346747 | 8.094268286 | 7.866290548 | 7.995119647 | 7.864871919 | 7.671356603 |
| 5.638959969 | 2.262061444 | 1.520899766 | 1.40189026  | 1.824050315 | 2.275883944 |
| 10.0891474  | 9.978474547 | 9.916621369 | 9.334855951 | 9.912022336 | 9.866564273 |
| 6.626844947 | 6.149479768 | 5.639043496 | 5.703574518 | 5.340507563 | 4.834616782 |
| 5.99615815  | 2.924770305 | 3.015764765 | 2.38194199  | 2.34524792  | 2.275883944 |
| 9.628970683 | 9.616721413 | 9.745933413 | 9.807880243 | 9.811711574 | 9.821946365 |
| 10.36532874 | 10.43421265 | 10.59568299 | 10.61385488 | 10.72204646 | 10.56547645 |
| 3.169860822 | 3.091832257 | 3.911259693 | 3.371863457 | 2.34524792  | 3.109951065 |
| 11.31817789 | 11.28904307 | 11.15465578 | 11.17754277 | 11.29188489 | 11.25115944 |
| 2.969564903 | 2.51828802  | 1.520899766 | 1           | 1           | 1           |
| 6.693406036 | 5.924385992 | 5.479466135 | 5.386586789 | 5.340507563 | 4.252298811 |
| 1.662934613 | 2.735797961 | 2.666415399 | 1           | 1           | 1           |
| 6.097951976 | 5.735359855 | 5.736396015 | 5.222502    | 5.394349575 | 6.074413015 |
| 5.942434672 | 5.26145301  | 5.56146006  | 5.341578351 | 4.356767986 | 5.283857174 |

|             |             |             |             |             |             |
|-------------|-------------|-------------|-------------|-------------|-------------|
| 8.945849299 | 9.076577618 | 8.949097218 | 9.116790126 | 9.300630146 | 9.463733101 |
| 10.20346956 | 10.20045832 | 10.22096903 | 10.43056816 | 10.49906131 | 10.45780532 |
| 7.719877435 | 7.938512008 | 7.683062863 | 7.417608971 | 7.660324057 | 7.477859025 |
| 9.038379587 | 9.135157862 | 9.221284012 | 9.277762089 | 9.175515156 | 9.264742798 |
| 8.939007238 | 8.864999567 | 8.966758984 | 8.946888698 | 8.942382123 | 8.865260996 |
| 9.254946324 | 9.172930284 | 8.961734789 | 9.364687862 | 9.567010361 | 9.410484564 |
| 5.497107678 | 4.99241264  | 4.459634417 | 4.82484461  | 5.036273452 | 3.520607779 |
| 9.314312165 | 9.172930284 | 9.197973203 | 8.912678075 | 9.100562955 | 8.891407465 |
| 6.122316484 | 6.241232271 | 6.070979087 | 6.54274656  | 6.67451722  | 6.38366441  |
| 8.709001691 | 8.644118501 | 8.524124682 | 8.49386144  | 8.298153888 | 8.422708696 |
| 7.629274937 | 7.971037608 | 7.601426359 | 7.571717834 | 7.660324057 | 7.871434979 |
| 7.671164481 | 7.976387957 | 7.494163047 | 7.638364019 | 7.974986069 | 7.894601021 |
| 6.502419644 | 6.628693169 | 6.94120324  | 7.034937983 | 7.213057172 | 7.032101622 |
| 10.52233566 | 10.5445853  | 10.62139873 | 10.78120707 | 10.75971355 | 10.70469225 |
| 11.33976755 | 11.32251351 | 11.48127647 | 11.40955806 | 11.52998513 | 11.4188322  |
| 9.532273632 | 9.576771624 | 9.489110452 | 9.500130413 | 9.814182797 | 9.631696783 |
| 10.09069169 | 10.1797353  | 10.16414577 | 9.948659763 | 9.946221932 | 10.22175706 |
| 12.61910582 | 12.60726462 | 12.65565651 | 12.52663869 | 12.64817241 | 12.63755025 |
| 10.24150361 | 10.30089708 | 9.963872657 | 9.885386682 | 10.01443176 | 9.981916384 |
| 7.076734303 | 6.559081984 | 5.954412191 | 6.269962007 | 5.446254265 | 5.540381827 |
| 8.732933193 | 8.650826455 | 8.561136177 | 8.223151344 | 8.573729283 | 8.507800089 |
| 12.61078856 | 12.59839996 | 12.59103377 | 12.63304762 | 12.66058485 | 12.66643864 |
| 10.30939397 | 10.46403646 | 10.63724137 | 10.71767783 | 10.53695743 | 10.62209084 |
| 8.651567593 | 8.79102105  | 8.510427012 | 8.943127333 | 8.749283901 | 8.643899408 |
| 8.861521747 | 8.896385738 | 8.849253186 | 9.115119592 | 9.112659472 | 9.08004861  |
| 8.344953553 | 8.278803879 | 8.666793344 | 8.996730042 | 8.95587384  | 8.369962432 |
| 5.115399462 | 5.329928717 | 4.94017096  | 4.225303533 | 4.24398311  | 4.881751715 |
| 11.00834619 | 10.91640153 | 11.11786598 | 11.1727326  | 11.41990352 | 11.29915055 |
| 8.542949746 | 8.488055137 | 8.242774405 | 8.103561713 | 8.573729283 | 8.185036516 |
| 9.348277057 | 9.485908413 | 9.59997367  | 9.550442503 | 9.540391511 | 9.605611029 |
| 9.361130475 | 9.594277186 | 9.711926921 | 9.721587597 | 9.902763844 | 9.876779528 |
| 10.11972337 | 10.06514155 | 10.22830941 | 9.965445095 | 9.939446563 | 9.854800436 |
| 7.878480057 | 7.85963975  | 7.817065633 | 8.175857308 | 7.845673852 | 8.041936887 |
| 7.409309391 | 7.543700181 | 7.378279597 | 7.877859046 | 7.966124173 | 7.500685692 |
| 8.728972076 | 8.975999824 | 8.959216116 | 9.007575889 | 8.749283901 | 8.777635162 |
| 9.635333518 | 9.648908923 | 9.596736385 | 9.36889965  | 9.314660909 | 9.235556104 |
| 10.817301   | 10.83848196 | 10.82116485 | 10.76318714 | 10.56069875 | 10.70059044 |
| 6.725569324 | 6.758583409 | 6.63526632  | 6.572268072 | 6.488998496 | 6.31663636  |
| 6.557063793 | 6.720829303 | 6.709077783 | 6.924818429 | 7.257315961 | 7.073291772 |
| 7.399374419 | 7.212997062 | 6.930956757 | 6.183334418 | 6.412779514 | 6.153365028 |
| 9.486082338 | 9.354421864 | 9.189402283 | 8.976631712 | 9.254064225 | 9.237822318 |
| 7.161470457 | 6.66890267  | 6.899773294 | 6.104703228 | 6.18733174  | 6.553388384 |
| 7.671164481 | 7.745197389 | 7.548791342 | 7.486419313 | 7.472846725 | 7.462438096 |
| 7.941454893 | 8.044194949 | 8.17058206  | 7.581429295 | 7.615688897 | 7.545283279 |
| 7.885614555 | 7.667941813 | 7.975009955 | 7.390244264 | 7.003833377 | 7.61667935  |
| 9.443206648 | 9.346179581 | 9.419358232 | 9.043150913 | 8.863450061 | 9.291170133 |
| 8.308257034 | 7.763881753 | 7.658432351 | 8.359212378 | 7.615688897 | 7.462438096 |

|             |             |             |             |             |             |
|-------------|-------------|-------------|-------------|-------------|-------------|
| 6.022287836 | 5.85637022  | 5.805328069 | 5.667556125 | 6.513535519 | 6.20986693  |
| 10.29070447 | 10.27073087 | 9.400916261 | 9.252150009 | 9.136552417 | 9.367666064 |
| 9.97337586  | 9.979807112 | 9.819985163 | 9.764846397 | 10.01228105 | 9.953242059 |
| 7.184793961 | 7.0801504   | 7.030287001 | 7.600658274 | 7.615688897 | 7.477859025 |
| 11.28483802 | 11.29440795 | 11.19321249 | 11.02665588 | 11.18519458 | 11.17574442 |
| 11.50175473 | 11.69611112 | 11.76592344 | 12.00582107 | 11.84900912 | 11.92422144 |
| 10.12123529 | 10.18552162 | 10.0750622  | 10.1594671  | 10.48826955 | 10.26462001 |
| 7.064212394 | 7.039833643 | 7.058799756 | 6.91716944  | 6.18733174  | 6.367197082 |
| 8.021360831 | 7.572248791 | 7.652208453 | 8.045105055 | 8.464702518 | 7.994477353 |
| 8.872336214 | 8.983990471 | 9.382235491 | 9.463837968 | 9.376163541 | 9.172982677 |
| 5.704976993 | 5.29609709  | 3.734015431 | 4.068407991 | 4.558900638 | 2.942211478 |
| 10.7918944  | 10.71189201 | 10.93320783 | 10.86956462 | 11.02588599 | 11.0440276  |
| 12.74089284 | 12.68325608 | 12.71209569 | 12.59430178 | 12.96160573 | 12.77536367 |
| 9.574826536 | 9.564390106 | 9.595115014 | 9.520466278 | 10.22965351 | 9.821946365 |
| 7.727838717 | 7.853837522 | 6.878603453 | 6.512608315 | 6.607711868 | 6.665378497 |
| 8.430370514 | 8.291737315 | 8.479123309 | 8.827510908 | 8.613998814 | 8.79004257  |
| 9.63321569  | 9.72557538  | 9.400916261 | 9.329103071 | 8.978083385 | 9.2824147   |
| 5.20937531  | 5.189564533 | 3.419133915 | 3.074635247 | 2.34524792  | 4.178715345 |
| 4.285328166 | 3.72105059  | 3.911259693 | 4.687710463 | 4.894007383 | 4.252298811 |
| 11.57474755 | 11.49877638 | 11.48127647 | 11.63758039 | 11.64827562 | 11.66435735 |
| 9.448034025 | 9.468927462 | 9.32273841  | 9.343442484 | 9.537403314 | 9.454019391 |
| 2.459379109 | 1.552010398 | 2.453859607 | 3.371863457 | 2.727313987 | 2.275883944 |
| 6.097951976 | 6.60125042  | 6.824278552 | 7.137245015 | 7.286085063 | 6.968023745 |
| 9.840171066 | 9.642192027 | 9.920510738 | 9.86366359  | 10.06510985 | 9.973781709 |
| 9.038379587 | 8.70339601  | 8.597221865 | 8.480948164 | 8.573729283 | 8.619774115 |
| 7.327845346 | 7.507201167 | 6.609798764 | 6.591618726 | 6.584737829 | 6.094559763 |
| 9.486082338 | 9.472718317 | 9.430311307 | 9.04666064  | 9.205945018 | 9.344719651 |
| 7.089148463 | 6.500868827 | 7.039854002 | 6.572268072 | 6.412779514 | 5.732621125 |
| 6.725569324 | 6.770951703 | 7.235714099 | 6.729023555 | 6.18733174  | 6.582211399 |
| 9.548097416 | 9.652255681 | 9.783434359 | 9.710567142 | 9.905084043 | 9.960121152 |
| 9.476663919 | 9.37482388  | 9.152396892 | 9.395292514 | 9.549319143 | 9.444239836 |
| 7.550665149 | 7.300915582 | 7.193477533 | 6.702569621 | 6.779413358 | 6.842602549 |
| 10.91118471 | 11.0574974  | 11.2990824  | 11.30536909 | 11.22566955 | 11.12277589 |
| 10.51889853 | 10.49791414 | 10.56619407 | 10.64775939 | 10.87190318 | 10.72179361 |
| 9.107134858 | 9.103722474 | 9.3148795   | 8.939356136 | 9.008613315 | 9.046829489 |
| 6.757031177 | 7.109665393 | 6.878603453 | 6.351681315 | 5.991624824 | 6.523977768 |
| 3.345708554 | 1           | 1.902806559 | 2.192163608 | 3.029091357 | 3.741118641 |
| 7.101456712 | 7.275097979 | 6.63526632  | 6.772063248 | 7.021049908 | 6.968023745 |
| 7.263578997 | 7.119371049 | 7.077499931 | 6.939995809 | 6.332308105 | 6.333687577 |
| 7.81263035  | 7.987029494 | 8.283612017 | 8.376049667 | 8.470980627 | 8.344951959 |
| 9.757029842 | 9.798372453 | 9.951253881 | 9.937360055 | 10.06718329 | 9.950481211 |
| 9.745311892 | 9.615007277 | 9.859689861 | 10.12999179 | 10.19593969 | 10.13687583 |
| 8.072274046 | 7.726267866 | 7.363117106 | 7.460340739 | 7.054878598 | 7.152303519 |
| 7.568507884 | 7.543700181 | 7.664629513 | 7.771584182 | 8.069034919 | 7.774861468 |
| 6.366241698 | 6.57327552  | 6.857118337 | 6.221099191 | 6.386451309 | 6.094559763 |
| 8.034258568 | 8.366993725 | 8.638736571 | 8.524389726 | 8.326127784 | 8.694276727 |
| 10.2345355  | 10.23992041 | 10.27766174 | 10.43459221 | 10.29657431 | 10.42337442 |

|             |             |             |             |             |             |
|-------------|-------------|-------------|-------------|-------------|-------------|
| 4.196323698 | 5.29609709  | 4.621301235 | 3.892344006 | 5.036273452 | 3.741118641 |
| 2.459379109 | 1.552010398 | 3.531904981 | 3.828534121 | 3.676399415 | 4.735459195 |
| 7.241504561 | 5.784988506 | 5.42209455  | 5.773020902 | 5.036273452 | 5.449445606 |
| 8.127482573 | 8.234835352 | 8.226110096 | 8.2986845   | 8.717953569 | 8.344951959 |
| 10.33958207 | 10.25540789 | 9.971391282 | 9.875553079 | 9.968579413 | 9.894124851 |
| 5.857901324 | 6.111080041 | 6.295237616 | 5.948373061 | 6.125000019 | 5.969229824 |
| 11.32278459 | 11.28041753 | 11.18730595 | 11.07213862 | 11.33554544 | 11.29098929 |
| 7.241504561 | 7.507201167 | 7.332305518 | 7.850007921 | 7.522049061 | 7.588543475 |
| 9.56597174  | 9.386928023 | 9.466232388 | 9.219870613 | 9.202176201 | 9.210389939 |
| 11.01242571 | 10.85091499 | 10.98054874 | 10.71877824 | 10.82977939 | 10.76328737 |
| 11.95010888 | 12.05871315 | 12.06955598 | 11.84152281 | 11.95358546 | 12.06328761 |
| 5.604782933 | 5.989339017 | 5.392529877 | 5.318536384 | 5.920008939 | 5.807764794 |
| 8.151357495 | 8.064433312 | 8.157458592 | 7.71535912  | 8.069034919 | 7.859710952 |
| 8.497104481 | 8.55036917  | 8.574362913 | 8.069462965 | 8.532303365 | 8.328034138 |
| 2.736907833 | 3.091832257 | 3.163111837 | 2.192163608 | 1           | 1.559564046 |
| 8.638957071 | 8.722626018 | 8.827323127 | 8.430795737 | 8.805013275 | 8.986115537 |
| 6.959920741 | 7.129011846 | 7.039854002 | 6.450374626 | 6.438635846 | 6.299381202 |
| 5.969546468 | 5.657561172 | 5.392529877 | 5.092705987 | 4.817242336 | 4.57264077  |
| 6.34569435  | 6.889130728 | 1.520899766 | 2.699847117 | 2.34524792  | 3.520607779 |
| 10.71387682 | 10.48951901 | 10.54283412 | 10.31380945 | 10.61981034 | 10.3870811  |
| 9.452845304 | 9.594277186 | 9.653924365 | 9.336290593 | 9.379504676 | 9.509469597 |
| 6.817968469 | 6.770951703 | 6.961480435 | 6.502420681 | 6.799507466 | 6.651846005 |
| 11.45155796 | 11.48898317 | 11.58293764 | 11.71654548 | 11.81917764 | 11.62723853 |
| 7.629274937 | 7.521911764 | 7.340070326 | 8.013171037 | 7.766220101 | 7.382759567 |
| 7.409309391 | 7.185541663 | 7.340070326 | 6.991893455 | 6.438635846 | 7.103430536 |
| 7.735756306 | 8.216865747 | 8.11283095  | 8.194961367 | 8.33303732  | 8.175610506 |
| 10.6628826  | 10.57752405 | 10.52676454 | 10.78488928 | 10.75457619 | 10.68323436 |
| 6.862039628 | 6.642221239 | 6.489280693 | 6.969879803 | 6.584737829 | 6.830640875 |
| 9.152202616 | 8.722626018 | 9.011206323 | 8.777694369 | 8.999956203 | 8.81150204  |
| 9.104079688 | 9.096369839 | 9.118937696 | 9.41985861  | 9.476301618 | 9.304204454 |
| 5.254163095 | 4.949529988 | 5.736396015 | 6.208620451 | 5.920008939 | 6.033255325 |
| 9.137335911 | 8.918790663 | 8.73610912  | 8.446822495 | 8.346757901 | 8.73975956  |
| 8.794875172 | 8.502961248 | 8.033644375 | 8.120313546 | 8.027043853 | 8.06764393  |
| 6.215857103 | 6.831250963 | 1.902806559 | 1.715872115 | 1           | 1.559564046 |
| 8.756474188 | 8.859218898 | 8.894776324 | 8.77134459  | 8.887116999 | 8.826637127 |
| 5.420583385 | 4.713619986 | 3.163111837 | 3.618193167 | 2.727313987 | 2.942211478 |
| 6.999918773 | 5.575326786 | 5.56146006  | 5.364258082 | 5.340507563 | 5.385472394 |
| 2.115432786 | 1           | 1           | 1.715872115 | 2.34524792  | 1           |
| 1           | 1           | 1.520899766 | 1.715872115 | 1           | 3.396272977 |
| 1           | 1           | 1           | 1.715872115 | 1.824050315 | 3.932350938 |
| 1           | 3.091832257 | 3.296794681 | 2.192163608 | 1.824050315 | 1.961732649 |
| 9.78782023  | 9.805904982 | 9.92954536  | 10.1594671  | 9.984026019 | 10.01664606 |
| 5.297602228 | 4.36772701  | 4.459634417 | 5.386586789 | 4.121627621 | 4.57264077  |
| 8.169007924 | 8.156868887 | 8.028848172 | 7.656853669 | 7.920979301 | 8.284850736 |
| 3.772519063 | 3.615275167 | 3.911259693 | 4.75790632  | 5.496356219 | 5.174538761 |
| 8.090912621 | 7.876907723 | 8.126364789 | 7.37357278  | 7.682134238 | 7.811838214 |
| 5.420583385 | 5.546839624 | 5.639043496 | 6.063719846 | 6.438635846 | 6.012227628 |



|             |             |             |             |             |             |
|-------------|-------------|-------------|-------------|-------------|-------------|
| 6.757031177 | 6.587330775 | 7.114188451 | 6.407342185 | 5.680989096 | 6.76929803  |
| 8.420580014 | 8.592789323 | 8.342779539 | 8.023894442 | 8.027043853 | 8.146957232 |
| 7.317331132 | 7.129011846 | 6.824278552 | 6.396380483 | 6.696115476 | 7.06310396  |
| 4.727844166 | 2.262061444 | 1.902806559 | 1           | 1.824050315 | 1           |
| 4.662889011 | 3.998540311 | 1           | 1.40189026  | 2.34524792  | 1.961732649 |
| 6.238324409 | 5.603262322 | 6.930956757 | 6.878304096 | 6.156502484 | 6.957061838 |
| 8.634728949 | 8.650826455 | 8.878872845 | 9.014761419 | 9.104606408 | 8.817575141 |
| 6.34569435  | 6.60125042  | 2.666415399 | 3.618193167 | 2.727313987 | 3.839901004 |
| 7.541660341 | 7.050018949 | 7.001199353 | 6.638889421 | 6.359633686 | 6.333687577 |
| 6.643775324 | 5.735359855 | 6.143766352 | 6.317223955 | 6.359633686 | 5.831967395 |
| 8.704974225 | 8.640752791 | 8.283612017 | 8.362032274 | 7.948235386 | 8.170874306 |
| 11.05021972 | 10.91361526 | 10.79809577 | 10.71216318 | 10.55479994 | 10.66734926 |
| 10.80794324 | 10.79977246 | 10.92031675 | 10.86061954 | 11.26051678 | 11.18223081 |
| 9.426182478 | 9.567938539 | 9.516778962 | 9.366093158 | 9.379504676 | 9.275813078 |
| 6.426184157 | 6.376883414 | 6.357769641 | 5.738715534 | 5.496356219 | 5.706677567 |
| 10.28531983 | 10.23992041 | 10.34577261 | 10.38416018 | 10.39064461 | 10.22861013 |
| 8.982911384 | 9.098824883 | 9.016061438 | 9.229167229 | 9.30415065  | 9.293350714 |
| 5.638959969 | 6.010356039 | 6.161403507 | 6.772063248 | 6.561392014 | 6.651846005 |
| 8.308257034 | 8.049281218 | 8.07145058  | 8.564114497 | 8.544261217 | 8.235806672 |
| 7.727838717 | 7.367585666 | 6.756267574 | 7.020732029 | 7.07150006  | 7.123178845 |
| 10.95253749 | 10.98569208 | 10.88625071 | 11.03286272 | 11.06480057 | 11.01260808 |
| 8.771957453 | 8.902019674 | 8.860094462 | 8.991276389 | 9.092441894 | 9.051990174 |
| 10.82937606 | 10.82964074 | 10.91057228 | 10.92496415 | 10.97599448 | 10.94347918 |
| 7.184793961 | 6.205228431 | 4.94017096  | 4.575565097 | 4.894007383 | 5.056252732 |
| 8.435240961 | 8.399220977 | 8.496598042 | 8.175857308 | 8.452063741 | 8.077799845 |
| 9.922254277 | 9.817875819 | 9.924389649 | 10.04918853 | 9.743336374 | 9.943555888 |
| 8.313556889 | 8.023668634 | 7.766101646 | 8.330706054 | 7.835978159 | 8.127533928 |
| 6.426184157 | 6.293607403 | 6.432305861 | 6.54274656  | 6.607711868 | 6.610469831 |
| 10.75438757 | 10.92057088 | 10.97432565 | 11.05307063 | 10.94363064 | 10.89260789 |
| 5.20937531  | 5.189564533 | 4.719818172 | 5.247116524 | 5.591624257 | 4.683201781 |
| 2.736907833 | 3.241540814 | 1           | 1.715872115 | 1.824050315 | 1.559564046 |
| 6.592376231 | 6.57327552  | 6.5440907   | 6.077510738 | 5.805443346 | 6.350539618 |
| 8.04704202  | 8.243736912 | 8.230294254 | 8.51174802  | 8.483455474 | 8.386398405 |
| 9.246658354 | 9.484031481 | 9.459119367 | 9.808913979 | 9.5463494   | 9.548333142 |
| 6.464805401 | 6.60125042  | 6.835308414 | 7.439133061 | 6.67451722  | 7.17139837  |
| 8.626235348 | 8.744741787 | 8.918307589 | 9.050161848 | 9.128631988 | 9.00486565  |
| 6.022287836 | 6.440207626 | 6.013872616 | 6.805593785 | 6.877196886 | 6.651846005 |
| 8.001795415 | 7.634489671 | 7.494163047 | 7.532204757 | 8.060733912 | 7.72403707  |
| 11.63737261 | 11.60059857 | 11.63041091 | 11.75191334 | 11.68316803 | 11.70751142 |
| 11.41195806 | 11.50526845 | 11.65785207 | 11.68282839 | 11.72513694 | 11.61028392 |
| 8.914801212 | 8.713043054 | 9.093898169 | 8.963694529 | 9.171665894 | 9.168237827 |
| 9.570405931 | 9.154167688 | 9.487363424 | 9.567645252 | 9.811711574 | 9.703963379 |
| 10.27040763 | 10.33044542 | 10.43367212 | 10.26868949 | 10.24804849 | 10.18816707 |
| 10.81169363 | 10.84361443 | 10.77536786 | 10.66954834 | 10.65745535 | 10.78126647 |
| 6.557063793 | 6.559081984 | 6.432305861 | 6.118109656 | 6.125000019 | 5.990888907 |
| 6.502419644 | 6.010356039 | 6.372988141 | 5.855376688 | 5.226392402 | 6.074413015 |
| 7.173179341 | 7.565164426 | 7.308757152 | 7.013576248 | 6.932836069 | 7.227211809 |

|             |             |             |             |             |             |
|-------------|-------------|-------------|-------------|-------------|-------------|
| 6.946337782 | 7.194751639 | 6.609798764 | 6.901748714 | 6.986408908 | 6.946016002 |
| 6.047952674 | 6.205228431 | 6.033160362 | 6.221099191 | 6.217515958 | 6.114429039 |
| 5.163152438 | 4.763989148 | 5.16664667  | 4.575565097 | 6.092794286 | 4.971638961 |
| 7.679398388 | 7.899614806 | 7.939672717 | 7.825699974 | 7.546034951 | 7.684708156 |
| 9.797309002 | 10.04363945 | 9.862388255 | 10.01823985 | 10.11206091 | 10.06339349 |
| 10.8486709  | 10.78688877 | 10.76962949 | 10.69660904 | 11.00872742 | 10.93721751 |
| 11.64264618 | 11.56685896 | 11.61369213 | 11.65952245 | 11.82286379 | 11.7691315  |
| 4.369159279 | 4.36772701  | 4.569399469 | 5.430233455 | 5.446254265 | 4.735459195 |
| 9.060613724 | 9.186843813 | 9.415688649 | 9.273275224 | 9.239428521 | 9.260290791 |
| 7.149665765 | 7.266388411 | 7.783290457 | 7.423020174 | 7.328190834 | 6.946016002 |
| 9.45044167  | 9.68693572  | 9.568922158 | 9.422562532 | 9.425485847 | 9.484875797 |
| 8.515617773 | 8.118667951 | 8.299628795 | 8.194961367 | 8.172814352 | 8.289227709 |
| 10.97194002 | 10.96430996 | 10.80302013 | 10.62328771 | 10.69280069 | 10.76092567 |
| 6.787821537 | 7.060132851 | 7.010960543 | 7.041988846 | 6.537662192 | 6.705230636 |
| 9.49310602  | 8.907631693 | 8.076107449 | 7.962046811 | 8.305198378 | 7.928667196 |
| 10.27313043 | 10.24547076 | 9.935964198 | 9.95240675  | 9.84351194  | 9.931005912 |
| 10.55849775 | 10.4791915  | 10.49842159 | 10.31380945 | 10.28948748 | 10.4213819  |
| 3.345708554 | 3.911841602 | 2.453859607 | 3.458731245 | 1.824050315 | 3.396272977 |
| 7.486418266 | 7.713508775 | 7.480176534 | 7.522155048 | 7.369102495 | 7.485508114 |
| 8.109313468 | 7.910835716 | 7.939672717 | 7.72415304  | 7.592842545 | 7.485508114 |
| 9.709575929 | 9.832701022 | 10.01205758 | 9.06061478  | 9.593146956 | 9.398379832 |
| 10.71086747 | 10.67945495 | 10.62458121 | 10.95655783 | 10.88724113 | 10.83164848 |
| 7.317331132 | 7.35941846  | 7.645957589 | 7.688651093 | 7.816389075 | 7.651094694 |
| 11.78727598 | 11.5836083  | 11.40003487 | 11.41703475 | 11.18232792 | 11.40225861 |
| 9.650071903 | 9.560832924 | 9.555645215 | 9.722685027 | 9.674281773 | 9.791415567 |
| 4.594870902 | 2.51828802  | 3.911259693 | 3.761770816 | 4.356767986 | 3.741118641 |
| 6.817968469 | 6.111080041 | 3.419133915 | 4.453961963 | 4.24398311  | 3.396272977 |
| 9.246658354 | 9.380888646 | 9.233842012 | 8.945009242 | 9.046940035 | 9.19647563  |
| 9.110183573 | 9.025875506 | 9.165566274 | 9.000354392 | 9.190810315 | 9.129706549 |
| 8.226330227 | 8.354720455 | 8.610123325 | 8.506660157 | 8.556120769 | 8.548534875 |
| 9.433503163 | 9.329552389 | 9.20861574  | 8.980306841 | 9.025773235 | 9.180070819 |
| 8.604779966 | 8.738457514 | 8.77958457  | 7.809264116 | 8.53829468  | 8.454234751 |
| 5.297602228 | 3.911841602 | 5.16664667  | 5.553769232 | 4.966893338 | 5.385472394 |
| 6.282235843 | 6.3106516   | 6.342388893 | 5.963305922 | 5.284577982 | 5.510702103 |
| 7.871310103 | 8.074447014 | 7.833661257 | 8.185440959 | 8.233156008 | 8.203705765 |
| 10.03242261 | 9.828269435 | 9.972640585 | 9.34201494  | 9.84351194  | 9.926798208 |
| 7.805124677 | 7.853837522 | 7.898198157 | 7.460340739 | 7.671270362 | 7.637426915 |
| 10.70785184 | 10.60541748 | 10.40712095 | 10.55037269 | 10.58983632 | 10.68987084 |
| 8.430370514 | 8.543176276 | 8.884193508 | 8.806962655 | 8.942382123 | 8.902877729 |
| 8.952659064 | 9.025875506 | 8.956693037 | 8.933680793 | 9.355952589 | 9.258059625 |
| 7.646176987 | 7.454499711 | 7.664629513 | 8.116978704 | 8.085495004 | 8.170874306 |
| 9.735473701 | 9.837119038 | 10.06103605 | 10.10327619 | 9.959677954 | 9.925392908 |
| 8.932132573 | 8.870757166 | 9.109882617 | 9.125113906 | 9.438358574 | 9.187124306 |
| 10.70885775 | 10.83701218 | 10.74425225 | 10.79796383 | 11.03120646 | 10.86721547 |
| 10.55402675 | 10.58279532 | 10.37252003 | 10.60970854 | 10.7914141  | 10.63418456 |
| 8.297598557 | 7.960277013 | 7.9498577   | 7.647638464 | 7.855304819 | 7.865584875 |
| 8.794875172 | 8.55752638  | 8.821788126 | 8.40641675  | 8.45839697  | 8.434611845 |

|             |             |             |             |             |             |
|-------------|-------------|-------------|-------------|-------------|-------------|
| 12.05627299 | 12.06500469 | 12.00080478 | 12.1069919  | 12.17017803 | 12.1340403  |
| 4.961854738 | 5.735359855 | 4.980472725 | 4.613923687 | 4.736161969 | 2.533710429 |
| 9.066903901 | 8.674061683 | 8.450715868 | 8.769221771 | 8.805013275 | 8.533854956 |
| 9.797309002 | 9.769384705 | 9.930831415 | 9.999346869 | 10.01228105 | 10.11854572 |
| 6.324850125 | 6.470857031 | 5.759741239 | 5.472598337 | 6.412779514 | 6.447716088 |
| 6.386500509 | 6.933818687 | 6.475246535 | 6.999157322 | 6.799507466 | 6.553388384 |
| 10.18623824 | 10.25320554 | 10.04092929 | 10.35685433 | 10.2680157  | 10.29540781 |
| 4.790000379 | 6.010356039 | 5.331518423 | 5.933284016 | 6.18733174  | 5.174538761 |
| 7.467523966 | 7.34294402  | 7.458939189 | 7.090402967 | 6.488998496 | 7.103430536 |
| 8.736883465 | 8.156868887 | 6.161403507 | 6.69364274  | 5.991624824 | 5.924911051 |
| 6.303700321 | 6.455613719 | 6.311126551 | 6.666525816 | 6.438635846 | 6.31663636  |
| 9.246658354 | 9.502691817 | 9.591866795 | 9.196363552 | 9.205945018 | 9.141858487 |
| 8.059713194 | 8.532319243 | 8.27148165  | 8.457408935 | 7.724789689 | 8.222136507 |
| 8.449754417 | 8.571735153 | 8.544430383 | 8.364846669 | 8.262406054 | 8.306604004 |
| 9.175675216 | 9.053981906 | 9.233842012 | 8.847770597 | 8.819845872 | 8.919913927 |
| 7.076734303 | 6.987799746 | 6.709077783 | 7.269283472 | 7.369102495 | 7.093454075 |
| 1.662934613 | 1.552010398 | 1           | 3.180662487 | 3.029091357 | 1.559564046 |
| 5.857901324 | 6.241232271 | 1.902806559 | 2.549633394 | 1.824050315 | 3.109951065 |
| 8.415659735 | 8.239292997 | 8.517292103 | 7.920566934 | 8.18813802  | 8.102881187 |
| 8.06600729  | 7.976387957 | 8.520712437 | 7.614913661 | 8.262406054 | 8.010471298 |
| 10.62074834 | 10.23211387 | 10.04687219 | 9.883425316 | 10.39560348 | 9.815891675 |
| 8.425483569 | 8.099181344 | 8.38842626  | 8.585988184 | 8.53829468  | 8.619774115 |
| 3.999927798 | 4.763989148 | 4.069091575 | 4.495645642 | 3.029091357 | 4.322310646 |
| 4.790000379 | 3.998540311 | 3.163111837 | 2.192163608 | 2.727313987 | 1.559564046 |
| 10.85686178 | 10.81925703 | 10.93961042 | 10.55345984 | 10.57096397 | 10.67405906 |
| 8.520209212 | 7.899614806 | 7.954923354 | 7.496720166 | 7.42190694  | 7.227211809 |
| 3.169860822 | 3.241540814 | 1.520899766 | 2.192163608 | 2.727313987 | 1           |
| 10.86139225 | 10.80954764 | 10.75518292 | 10.69605042 | 10.93797654 | 10.84508906 |
| 12.41451467 | 12.53816956 | 12.58369418 | 12.41735454 | 12.43992499 | 12.5267697  |
| 5.942434672 | 6.13040766  | 4.569399469 | 4.651288752 | 4.736161969 | 4.735459195 |
| 10.18334624 | 10.06388555 | 10.00840765 | 10.29179561 | 10.3400953  | 10.31055878 |
| 9.137335911 | 9.291425398 | 9.070751581 | 9.148168194 | 9.063652681 | 9.194143476 |
| 7.428976411 | 7.257625943 | 6.951377462 | 7.041988846 | 6.877196886 | 7.042509934 |
| 6.876435835 | 6.900433157 | 6.596894388 | 6.233470919 | 6.18733174  | 6.172445927 |
| 4.961854738 | 5.152230778 | 4.277538014 | 4.321157665 | 3.491138785 | 3.260203441 |
| 10.06106378 | 9.707993899 | 9.624024498 | 9.33341988  | 9.507175918 | 9.304204454 |
| 7.477002047 | 7.593295521 | 7.633374018 | 7.333906686 | 7.522049061 | 7.011056979 |
| 6.366241698 | 6.360608329 | 6.432305861 | 6.049795852 | 6.026142292 | 6.281917164 |
| 7.338283488 | 7.35941846  | 7.695222204 | 7.77581977  | 7.806493878 | 7.743306648 |
| 5.459352853 | 5.809176966 | 6.279171741 | 6.977255072 | 6.059853167 | 6.38366441  |
| 8.454559971 | 7.992320972 | 7.581912571 | 7.643008695 | 7.434811497 | 7.446850551 |
| 9.063762241 | 9.007700245 | 9.047227566 | 9.014761419 | 8.78499624  | 8.914257518 |
| 10.75827961 | 10.91431233 | 11.15079801 | 11.08670228 | 11.10572219 | 11.08299392 |
| 6.757031177 | 5.603262322 | 4.980472725 | 4.687710463 | 5.036273452 | 5.318530269 |
| 7.842268546 | 8.054349618 | 7.887640503 | 7.351040154 | 7.735259366 | 7.704506626 |
| 11.02459554 | 10.99296959 | 10.97930626 | 11.13737078 | 11.13961561 | 11.10674653 |
| 9.74922846  | 9.861902077 | 10.09125554 | 9.981120573 | 10.13793782 | 10.08495295 |

|             |             |             |             |             |             |
|-------------|-------------|-------------|-------------|-------------|-------------|
| 9.645876277 | 9.594277186 | 9.450178487 | 9.729252131 | 9.941708557 | 9.902719931 |
| 6.483735105 | 6.424635239 | 6.570734112 | 6.374204007 | 5.765139818 | 5.879187565 |
| 10.07673323 | 9.963734518 | 10.14875453 | 10.22133651 | 10.05678617 | 10.30948182 |
| 8.090912621 | 8.028827657 | 8.327237278 | 8.387166339 | 8.165091048 | 8.082851118 |
| 6.464805401 | 6.708021809 | 6.311126551 | 6.502420681 | 6.464036922 | 6.596409802 |
| 8.744751706 | 8.62721088  | 8.669877348 | 8.649687119 | 8.707357082 | 8.410706521 |
| 6.741386012 | 5.85637022  | 6.262924938 | 6.746393813 | 6.24708158  | 6.299381202 |
| 8.551946535 | 8.578787405 | 8.544430383 | 8.697356619 | 8.653174768 | 8.73975956  |
| 7.948285383 | 7.763881753 | 7.944774196 | 7.293119087 | 7.626977818 | 7.30708102  |
| 10.30939397 | 10.37973291 | 10.59324847 | 10.64080973 | 10.73384184 | 10.65553151 |
| 8.053391518 | 8.069448851 | 8.019207663 | 7.512034842 | 7.692916917 | 7.805740863 |
| 6.802973746 | 6.530269    | 6.824278552 | 5.902624065 | 5.805443346 | 6.114429039 |
| 4.285328166 | 5.902068469 | 5.057848307 | 3.761770816 | 1           | 3.396272977 |
| 8.67234323  | 8.589301563 | 8.629261738 | 8.373257063 | 8.305198378 | 8.156571694 |
| 10.03081463 | 8.32567014  | 6.961480435 | 7.124016042 | 6.838875062 | 7.073291772 |
| 9.874642915 | 9.900408732 | 9.793366409 | 10.00477016 | 10.06303343 | 9.985966586 |
| 10.26494656 | 10.42152005 | 10.41081236 | 10.83090452 | 10.77881735 | 10.65043698 |
| 10.19918098 | 10.37771254 | 10.4641913  | 10.520395   | 10.66294977 | 10.46265763 |
| 7.038837728 | 7.620888564 | 7.725179617 | 7.796813165 | 7.920979301 | 7.781090449 |
| 9.543594017 | 9.576771624 | 9.693860999 | 9.708352913 | 10.01228105 | 9.680829809 |
| 8.542949746 | 8.450101804 | 8.447125283 | 7.586260621 | 8.305198378 | 8.394546703 |
| 9.340509677 | 9.606405909 | 9.761918317 | 9.696113531 | 9.789277987 | 9.791415567 |
| 9.86384579  | 10.06765027 | 9.928258159 | 9.682641979 | 10.114068   | 9.889808031 |
| 7.358935903 | 6.944777693 | 7.620679723 | 7.322370277 | 7.242713376 | 7.245346553 |
| 9.348277057 | 9.333727186 | 9.086993102 | 9.367497086 | 9.84351194  | 9.494384631 |
| 8.752577268 | 8.957181048 | 9.096192533 | 9.286694173 | 9.144429601 | 9.317122067 |
| 10.77374362 | 10.75611249 | 10.75009224 | 10.99476053 | 11.00223997 | 11.00064707 |
| 8.109313468 | 7.899614806 | 7.90867911  | 7.833848215 | 7.806493878 | 7.657880332 |
| 7.379296842 | 7.039833643 | 6.846254589 | 6.591618726 | 7.534091853 | 7.218058231 |
| 7.219087112 | 6.900433157 | 6.813163712 | 6.991893455 | 6.332308105 | 7.132952544 |
| 4.523486615 | 4.859740248 | 4.069091575 | 4.321157665 | 4.894007383 | 4.252298811 |
| 5.569776566 | 5.630667188 | 2.453859607 | 3.074635247 | 1.824050315 | 1.961732649 |
| 9.224321467 | 8.949040101 | 8.813445605 | 8.556748943 | 8.764697562 | 8.777635162 |
| 11.14913542 | 11.14026996 | 11.31048991 | 10.95188605 | 10.92317134 | 10.99462918 |
| 8.809953865 | 8.713043054 | 8.936347966 | 8.937466835 | 9.096508139 | 8.991497624 |
| 8.732933193 | 8.747873688 | 8.835586013 | 9.130085219 | 9.187001701 | 8.996859708 |
| 9.894230187 | 9.778601809 | 9.77629794  | 9.3883937   | 9.690513336 | 9.541010828 |
| 8.587382921 | 8.528681999 | 8.500067731 | 8.009578783 | 8.495823376 | 8.492697565 |
| 9.019045162 | 9.271977269 | 9.040094909 | 8.843741356 | 8.653174768 | 8.953394427 |
| 9.464803766 | 9.626963683 | 9.773433458 | 9.815100887 | 9.891106545 | 9.750734372 |
| 10.42408389 | 10.51914902 | 10.24287906 | 10.30064149 | 10.66157813 | 10.55642626 |
| 9.894230187 | 9.820853072 | 9.932116323 | 9.951470916 | 10.13200729 | 10.15017142 |
| 9.674992606 | 9.712810136 | 9.747393927 | 9.574955524 | 9.850752    | 9.645418699 |
| 9.504736698 | 9.604679465 | 9.649244336 | 9.801662225 | 9.50105369  | 9.45011552  |
| 5.914803605 | 5.546839624 | 5.392529877 | 5.451571397 | 5.680989096 | 5.855770664 |
| 10.22753356 | 10.18320987 | 10.26037522 | 10.26568092 | 10.31064438 | 10.32448647 |
| 8.151357495 | 7.770056484 | 8.103737339 | 7.33964048  | 7.497657635 | 7.50821502  |

|             |             |             |             |             |             |
|-------------|-------------|-------------|-------------|-------------|-------------|
| 8.04704202  | 8.203240119 | 8.02403597  | 7.610177499 | 7.724789689 | 7.888844291 |
| 9.276817589 | 9.254467168 | 9.278974808 | 9.273275224 | 9.190810315 | 9.524398463 |
| 7.438710287 | 7.166943424 | 6.622588738 | 6.6481605   | 7.003833377 | 6.76929803  |
| 8.932132573 | 8.787981526 | 8.854684008 | 8.92607877  | 8.653174768 | 8.874029242 |
| 8.46888133  | 8.650826455 | 8.414401433 | 8.462673167 | 8.367097167 | 8.530161518 |
| 9.143300989 | 8.994576283 | 8.923485042 | 8.559208309 | 8.819845872 | 8.862326364 |
| 8.798659646 | 8.867881238 | 8.567764703 | 8.438831371 | 8.685927719 | 8.530161518 |
| 9.598900667 | 9.575009328 | 9.66014088  | 9.289659287 | 9.657865511 | 9.473381844 |
| 8.972897598 | 9.189149744 | 8.830082684 | 8.704039767 | 8.664175246 | 9.018110944 |
| 8.744751706 | 8.630608293 | 8.638736571 | 8.259901079 | 8.393777685 | 8.442493064 |
| 8.090912621 | 7.687646999 | 6.557473911 | 6.522724513 | 6.717395152 | 6.651846005 |
| 9.178582619 | 9.056510088 | 9.054325133 | 8.881572278 | 8.95587384  | 8.879845273 |
| 4.90681358  | 5.225956494 | 4.671400465 | 6.183334418 | 6.125000019 | 5.807764794 |
| 8.972897598 | 8.959884521 | 9.258634759 | 9.351978216 | 9.338891113 | 9.203449559 |
| 7.327845346 | 7.275097979 | 7.771854035 | 7.675109349 | 7.864871919 | 8.041936887 |
| 6.303700321 | 6.628693169 | 6.143766352 | 6.407342185 | 6.652590701 | 6.228219627 |
| 9.204488908 | 9.084031557 | 9.283008631 | 9.126772914 | 9.076061327 | 9.105091224 |
| 8.591751889 | 8.989293086 | 8.629261738 | 8.817273365 | 9.148352123 | 9.100117356 |
| 10.37929597 | 10.33044542 | 10.42274463 | 10.56757626 | 10.64501584 | 10.58251695 |
| 8.583000681 | 8.457772767 | 4.94017096  | 4.791763656 | 5.102469568 | 4.785889718 |
| 8.259661286 | 8.08933844  | 8.544430383 | 8.310411101 | 8.9378567   | 8.588151019 |
| 11.4889292  | 11.64621081 | 11.75507415 | 11.68761334 | 11.89817382 | 11.79590913 |
| 12.15847462 | 12.2068919  | 12.19125537 | 12.28766023 | 12.34484863 | 12.35054987 |
| 6.073168917 | 6.051493279 | 5.392529877 | 5.247116524 | 5.226392402 | 4.514011558 |
| 5.014872929 | 3.241540814 | 3.419133915 | 3.540664263 | 1           | 1.559564046 |
| 4.90681358  | 3.998540311 | 3.63649658  | 2.192163608 | 1           | 3.520607779 |
| 6.324850125 | 6.293607403 | 5.849518442 | 5.065284254 | 5.636998506 | 4.452898434 |
| 6.66050932  | 6.327496784 | 6.013872616 | 5.773020902 | 5.394349575 | 5.807764794 |
| 5.79866224  | 4.49246866  | 3.911259693 | 3.828534121 | 3.029091357 | 3.109951065 |
| 11.10855091 | 11.07381236 | 10.9978319  | 10.80988865 | 10.8113429  | 10.90976507 |
| 9.520863716 | 9.438236597 | 9.54224495  | 9.027250618 | 9.359340805 | 9.187124306 |
| 9.598900667 | 9.463222437 | 9.797602159 | 9.321879562 | 9.454289623 | 9.4962789   |
| 11.63260987 | 11.66993272 | 11.43806543 | 11.71682087 | 11.82837541 | 11.77733396 |
| 9.579233637 | 9.515611913 | 9.408321363 | 9.037870262 | 9.415755361 | 9.180070819 |
| 9.073166772 | 9.106165049 | 9.121192614 | 9.113447121 | 9.071936959 | 9.14427664  |
| 8.339767996 | 8.521379885 | 8.706380146 | 8.210690418 | 8.109838281 | 8.504039254 |
| 9.574826536 | 9.524770222 | 9.794779708 | 9.395292514 | 9.286461588 | 9.161091165 |
| 9.948041492 | 9.876283911 | 10.00107997 | 9.891254831 | 9.779194424 | 9.894124851 |
| 10.91554801 | 10.8450775  | 10.957388   | 10.67068606 | 10.80638645 | 10.68987084 |
| 9.626843486 | 9.652255681 | 9.573869679 | 9.478204789 | 9.485633481 | 9.390253215 |
| 7.149665765 | 6.854682249 | 7.114188451 | 6.552654337 | 6.386451309 | 6.350539618 |
| 6.406478774 | 6.186883866 | 6.878603453 | 6.221099191 | 6.092794286 | 6.094559763 |
| 11.49068487 | 11.6135332  | 11.55568734 | 11.72423677 | 11.83569164 | 11.76599445 |
| 8.861521747 | 8.79102105  | 8.765237832 | 8.480948164 | 8.464702518 | 8.414718351 |
| 10.61860897 | 10.66544526 | 10.63408673 | 10.52417645 | 10.57970497 | 10.60901979 |
| 6.386500509 | 6.3106516   | 5.56146006  | 4.88881432  | 5.394349575 | 5.248330196 |
| 6.260447187 | 6.424635239 | 5.56146006  | 5.703574518 | 4.558900638 | 5.318530269 |

|             |             |             |             |             |             |
|-------------|-------------|-------------|-------------|-------------|-------------|
| 4.369159279 | 3.819597725 | 3.992332924 | 2.549633394 | 1.824050315 | 2.752371363 |
| 10.67322666 | 10.62854021 | 10.71469233 | 10.35897323 | 10.26981727 | 10.58251695 |
| 7.93459191  | 7.375706898 | 7.141105244 | 7.36797253  | 6.464036922 | 6.692068528 |
| 8.533896501 | 8.660830267 | 8.730212132 | 8.663468455 | 8.942382123 | 8.956149711 |
| 6.693406036 | 6.485940968 | 5.994323509 | 5.271318122 | 4.894007383 | 5.90223044  |
| 9.733497986 | 9.793833985 | 9.627201194 | 9.882443632 | 9.939446563 | 9.879684935 |
| 8.583000681 | 8.407166549 | 8.475602818 | 8.096806134 | 8.18813802  | 8.156571694 |
| 8.721017063 | 8.578787405 | 8.335029339 | 8.310411101 | 7.966124173 | 8.570278422 |
| 9.753134424 | 9.633751688 | 9.573869679 | 9.236868908 | 9.451117456 | 9.539174428 |
| 5.066011601 | 2.735797961 | 1.520899766 | 2.192163608 | 1           | 2.275883944 |
| 11.47362329 | 11.66910694 | 11.65123562 | 11.68536358 | 11.72907103 | 11.71485109 |
| 11.45035557 | 11.44479588 | 11.56813768 | 11.60134625 | 11.63155902 | 11.57889678 |
| 8.097072351 | 8.008079944 | 8.161846359 | 8.100187878 | 8.157326174 | 8.102881187 |
| 10.98112805 | 10.64291111 | 10.68222503 | 10.49749573 | 10.49136115 | 10.48953298 |
| 7.662883311 | 7.469754736 | 7.689155344 | 7.287197001 | 7.355593773 | 6.957061838 |
| 9.97672041  | 9.997019371 | 9.957577065 | 9.699461855 | 9.632885465 | 9.715392531 |
| 11.78537    | 11.86643487 | 11.80115801 | 12.05935775 | 12.04531774 | 12.0908159  |
| 10.63880597 | 10.82371635 | 10.90141768 | 10.94202581 | 10.99354442 | 10.91685411 |
| 9.747271505 | 9.799882108 | 9.859689861 | 10.05791042 | 10.05469772 | 9.994033037 |
| 10.06578251 | 9.97714075  | 10.13207964 | 10.17958742 | 10.20726539 | 10.20332144 |
| 7.766999166 | 7.719902426 | 7.252268475 | 6.969879803 | 7.07150006  | 7.161882536 |
| 8.846975188 | 8.815109416 | 8.862792099 | 9.111772708 | 9.220922596 | 8.978004571 |
| 8.145425703 | 8.265753447 | 8.454297539 | 7.935788871 | 7.845673852 | 8.117723325 |
| 3.643786876 | 3.72105059  | 3.992332924 | 3.618193167 | 2.727313987 | 3.839901004 |
| 7.486418266 | 7.634489671 | 7.542074861 | 7.117355787 | 7.167397529 | 6.678785233 |
| 11.36551094 | 11.33974058 | 11.30603684 | 11.3903498  | 11.46227298 | 11.48137435 |
| 9.301032829 | 9.392942223 | 9.210734859 | 9.571305018 | 9.596022008 | 9.465668019 |
| 10.44475995 | 10.47636203 | 10.39226011 | 10.1867626  | 10.319369   | 10.2354308  |
| 10.09069169 | 10.02439716 | 9.885123082 | 9.861672448 | 10.23335132 | 10.06849537 |
| 1.662934613 | 2.924770305 | 3.163111837 | 2.549633394 | 4.356767986 | 3.109951065 |
| 8.157264997 | 8.118667951 | 8.213484316 | 7.693136908 | 7.569628571 | 8.082851118 |
| 9.516274363 | 9.683668544 | 9.763362746 | 9.943962303 | 9.948473336 | 9.728344503 |
| 10.72087432 | 10.68763285 | 10.81769316 | 10.98381754 | 10.94250159 | 10.88250449 |
| 6.34569435  | 6.807432831 | 6.835308414 | 7.103942318 | 7.003833377 | 7.272128289 |
| 9.978389782 | 9.837119038 | 10.12423157 | 10.0811995  | 10.16141913 | 10.22632939 |
| 1.662934613 | 2.262061444 | 1.902806559 | 3.074635247 | 1.824050315 | 2.275883944 |
| 9.719591702 | 9.652255681 | 9.822758778 | 9.732524507 | 9.891106545 | 10.06976802 |
| 9.532273632 | 9.55369214  | 9.480354079 | 9.746619654 | 9.73292536  | 9.59327436  |
| 5.969546468 | 5.784988506 | 5.994323509 | 6.439736251 | 6.412779514 | 6.350539618 |
| 9.858416773 | 9.942022005 | 9.790535651 | 9.900982347 | 10.14580747 | 10.01664606 |
| 10.2345355  | 10.21411012 | 10.24598208 | 10.22985207 | 10.13200729 | 10.27237877 |
| 7.981961006 | 7.800539838 | 7.965001612 | 7.710941977 | 8.027043853 | 7.671356603 |
| 4.369159279 | 3.377164271 | 2.666415399 | 2.549633394 | 1           | 2.275883944 |
| 9.883579201 | 9.969111969 | 9.934682713 | 10.05093713 | 10.0836644  | 10.06339349 |
| 9.161049655 | 9.069084967 | 8.938906846 | 8.645063929 | 8.728472793 | 8.802344182 |
| 7.797579751 | 7.687646999 | 7.707279919 | 7.841950693 | 7.948235386 | 7.871434979 |
| 8.647376322 | 8.476773605 | 8.635585202 | 8.741337057 | 8.839388391 | 8.856439132 |

|             |             |             |             |             |             |
|-------------|-------------|-------------|-------------|-------------|-------------|
| 7.486418266 | 7.94398412  | 7.658432351 | 7.362350457 | 7.257315961 | 7.298421905 |
| 8.736883465 | 8.829962928 | 8.878872845 | 8.723905439 | 8.7441092   | 8.891407465 |
| 6.677051441 | 6.470857031 | 6.432305861 | 6.170523241 | 6.412779514 | 6.094559763 |
| 7.774705297 | 7.66131315  | 7.588446538 | 7.137245015 | 7.003833377 | 7.245346553 |
| 6.959920741 | 7.019244738 | 7.141105244 | 6.711441605 | 6.18733174  | 6.596409802 |
| 5.380743228 | 5.51777861  | 4.569399469 | 5.197460215 | 5.544776471 | 4.322310646 |
| 6.904804321 | 6.485940968 | 6.503179644 | 6.439736251 | 7.151850774 | 7.18085185  |
| 10.46989852 | 10.37163438 | 10.32538151 | 10.520395   | 10.52040564 | 10.51591683 |
| 8.318837345 | 8.207796308 | 8.291642633 | 8.414588939 | 8.53829468  | 8.194401339 |
| 9.448034025 | 9.461315737 | 9.459119367 | 9.04666064  | 9.454289623 | 9.452068776 |
| 8.626235348 | 8.630608293 | 8.913111487 | 9.074435244 | 9.038510545 | 8.953394427 |
| 9.545847473 | 9.615007277 | 9.567269207 | 9.347716663 | 9.735535166 | 9.662389571 |
| 10.54729416 | 10.53555231 | 10.47127942 | 10.61621887 | 10.71941212 | 10.629877   |
| 9.481380814 | 9.459406515 | 9.459119367 | 9.597863334 | 9.84109049  | 9.669122415 |
| 10.5269058  | 10.61574003 | 10.58428659 | 10.61207934 | 10.72598898 | 10.72341179 |
| 8.115395296 | 7.788423678 | 7.676944545 | 7.110664642 | 7.104179293 | 7.485508114 |
| 11.09245449 | 11.05053898 | 11.10025667 | 11.14475847 | 11.24411507 | 11.15850282 |
| 11.28618651 | 11.36290536 | 11.26328793 | 11.38064891 | 11.44722661 | 11.34717171 |
| 8.583000681 | 8.379163463 | 8.60690876  | 8.342176263 | 8.733703782 | 8.752495566 |
| 8.587382921 | 8.680632162 | 8.541065885 | 8.411870016 | 8.413469178 | 8.414718351 |
| 7.34864665  | 7.707086664 | 8.043189212 | 7.920566934 | 7.626977818 | 7.967420328 |
| 9.028744763 | 9.046370667 | 8.580931084 | 8.815217109 | 8.625300915 | 8.64731318  |
| 9.607556244 | 9.580289771 | 9.681690132 | 9.7616466   | 9.682420382 | 9.817407731 |
| 8.542949746 | 8.216865747 | 7.378279597 | 7.688651093 | 7.434811497 | 7.500685692 |
| 6.609713527 | 6.66890267  | 6.5440907   | 6.317223955 | 6.276053451 | 6.509044524 |
| 10.94572715 | 11.07692881 | 10.99844535 | 11.12206512 | 11.11176153 | 11.02250038 |
| 10.7455919  | 10.56159371 | 10.62060201 | 10.44060731 | 10.56657353 | 10.68406559 |
| 9.406477072 | 9.542914252 | 9.459119367 | 9.524247545 | 9.735535166 | 9.705601669 |
| 5.497107678 | 6.010356039 | 5.507318447 | 5.119616214 | 5.036273452 | 5.136177653 |
| 11.65731042 | 11.83548742 | 11.91503054 | 11.69601886 | 11.83872915 | 11.80548981 |
| 7.735756306 | 7.836289497 | 7.707279919 | 7.780042959 | 8.195739248 | 7.811838214 |
| 8.700935485 | 8.70016594  | 8.7390486   | 8.467918259 | 8.596877893 | 8.511551146 |
| 10.46752315 | 10.57664363 | 10.69287621 | 10.66897914 | 10.94813801 | 10.82337271 |
| 8.48306192  | 8.265753447 | 8.475602818 | 8.378836876 | 8.312208637 | 8.302279511 |
| 6.802973746 | 6.866256711 | 5.267812428 | 5.430233455 | 5.165761148 | 5.096768599 |
| 8.613400446 | 8.585805351 | 8.547787053 | 8.764966739 | 9.004291253 | 8.717197374 |
| 11.80995354 | 11.82106273 | 11.79127964 | 11.74706766 | 11.83629966 | 11.86461097 |
| 9.49310602  | 9.382904582 | 9.346061495 | 9.371700693 | 9.282897599 | 9.260290791 |
| 8.46888133  | 8.23036389  | 8.841068429 | 8.561663488 | 8.508086151 | 8.511551146 |
| 5.297602228 | 5.683962973 | 5.934034702 | 5.933284016 | 5.340507563 | 6.246341787 |
| 8.914801212 | 8.97332641  | 9.025722923 | 9.157936929 | 9.128631988 | 9.062256491 |
| 5.942434672 | 6.424635239 | 4.980472725 | 5.341578351 | 5.394349575 | 5.096768599 |
| 8.053391518 | 8.094268286 | 7.607872738 | 8.086613079 | 8.109838281 | 8.151772472 |
| 7.703821849 | 7.492339025 | 7.3008215   | 7.423020174 | 7.408885913 | 7.349613753 |
| 7.263578997 | 7.423497042 | 6.143766352 | 6.305552825 | 6.18733174  | 6.447716088 |
| 7.541660341 | 7.231014618 | 7.731097169 | 7.796813165 | 7.434811497 | 7.829977157 |
| 8.308257034 | 8.59973965  | 8.936347966 | 8.76069912  | 8.556120769 | 8.73975956  |

|             |             |             |             |             |             |
|-------------|-------------|-------------|-------------|-------------|-------------|
| 4.285328166 | 4.55101495  | 2.204484772 | 5.271318122 | 4.894007383 | 3.932350938 |
| 12.11474434 | 12.06060349 | 11.76231606 | 11.56142101 | 11.76080412 | 11.81690326 |
| 9.79919929  | 9.590793026 | 9.59997367  | 9.471692146 | 9.454289623 | 9.490588615 |
| 8.692823928 | 8.876491878 | 8.862792099 | 8.972947197 | 9.136552417 | 8.996859708 |
| 10.70482988 | 10.7214826  | 10.63960283 | 10.87648377 | 10.8742735  | 10.79441283 |
| 10.50853772 | 10.49045422 | 10.46152425 | 10.49300058 | 10.71280514 | 10.66566693 |
| 8.420580014 | 8.476773605 | 8.500067731 | 8.172648558 | 8.298153888 | 8.365824014 |
| 10.17754479 | 10.34602941 | 10.28873777 | 10.36179359 | 10.37231487 | 10.4568329  |
| 6.539078069 | 5.784988506 | 5.61364312  | 5.685677723 | 4.817242336 | 5.248330196 |
| 5.380743228 | 5.29609709  | 5.639043496 | 4.366797664 | 4.24398311  | 4.971638961 |
| 5.638959969 | 6.149479768 | 5.362346647 | 6.269962007 | 6.092794286 | 5.90223044  |
| 3.643786876 | 2.924770305 | 1.902806559 | 1           | 1           | 1.559564046 |
| 6.022287836 | 6.25890276  | 6.622588738 | 6.118109656 | 6.304454951 | 6.012227628 |
| 10.80794324 | 10.82668158 | 10.77608356 | 10.89607185 | 10.8395167  | 10.95454439 |
| 5.672346062 | 6.587330775 | 6.388047781 | 6.035736161 | 6.464036922 | 6.20986693  |
| 14.58197124 | 14.45075325 | 14.44763762 | 14.65072831 | 14.33693318 | 14.63011116 |
| 10.78236983 | 10.81029684 | 10.98054874 | 11.09435334 | 10.91973307 | 10.97506564 |
| 9.389011252 | 9.19833679  | 9.016061438 | 9.188441972 | 9.268552943 | 9.219592145 |
| 7.941454893 | 7.971037608 | 7.508015266 | 7.455067975 | 7.855304819 | 7.664634203 |
| 9.378935019 | 9.265435861 | 9.464457418 | 9.317528032 | 9.24310139  | 9.194143476 |
| 10.89977796 | 10.88829362 | 10.81769316 | 10.82733805 | 10.76866015 | 10.79825672 |
| 8.248636274 | 8.054349618 | 7.924259142 | 8.350719467 | 8.269626834 | 8.434611845 |
| 9.97672041  | 9.914413614 | 9.925680305 | 9.694995694 | 9.862738607 | 9.853323189 |
| 9.24110647  | 9.048912211 | 9.289038296 | 9.039632628 | 9.32855653  | 9.434393535 |
| 8.736883465 | 8.644118501 | 9.118937696 | 9.027250618 | 9.479418951 | 9.214998379 |
| 8.380739763 | 8.387219962 | 8.275536449 | 8.198120926 | 8.077288436 | 8.336517847 |
| 10.83122482 | 10.87331479 | 10.7846443  | 10.62446249 | 10.65332075 | 10.52243808 |
| 8.400797408 | 8.329856171 | 8.429037078 | 8.283890926 | 8.276811654 | 8.588151019 |
| 9.888914523 | 9.950202539 | 9.796191624 | 10.03423921 | 10.13002502 | 10.08243321 |
| 8.939007238 | 8.959884521 | 9.047227566 | 9.105055558 | 8.946893396 | 8.917088495 |
| 7.495773425 | 7.971037608 | 7.535326966 | 7.805125727 | 7.557879992 | 7.956453817 |
| 6.520865289 | 6.485940968 | 6.5440907   | 6.091171049 | 5.920008939 | 6.299381202 |
| 10.69064312 | 10.71108991 | 10.86488002 | 10.94625988 | 10.87308883 | 10.83089809 |
| 2.969564903 | 2.735797961 | 3.419133915 | 4.453961963 | 4.817242336 | 3.520607779 |
| 8.591751889 | 8.366993725 | 8.510427012 | 8.226249831 | 8.125841888 | 8.092900914 |
| 6.817968469 | 6.911647729 | 6.388047781 | 6.763557417 | 7.341957365 | 7.664634203 |
| 11.52078172 | 11.50248971 | 11.61088673 | 11.5974629  | 11.78808787 | 11.65675556 |
| 11.30958337 | 11.19522204 | 11.16725917 | 11.14393948 | 11.27224755 | 11.24553952 |
| 7.477002047 | 8.221379175 | 8.510427012 | 8.454769599 | 7.755973504 | 8.082851118 |
| 10.17899734 | 10.25870511 | 10.21147619 | 10.30211055 | 10.30538417 | 10.40735667 |
| 8.935574    | 8.967964674 | 8.97426262  | 8.559208309 | 8.7441092   | 8.885637952 |
| 7.927696123 | 7.782327225 | 7.850068147 | 7.931998417 | 8.255148951 | 8.199061053 |
| 9.163986653 | 8.932619082 | 9.312908066 | 9.199520045 | 8.759577951 | 9.244599678 |
| 7.438710287 | 7.719902426 | 7.887640503 | 7.72415304  | 8.060733912 | 7.774861468 |
| 8.886630546 | 8.940852955 | 8.905282076 | 9.196363552 | 9.167806335 | 9.107571742 |
| 10.78999451 | 10.73811423 | 10.73618347 | 10.2932737  | 10.56363913 | 10.65043698 |
| 10.49343951 | 10.21976047 | 10.36016323 | 9.566423263 | 10.04210315 | 10.14051407 |



|             |             |             |             |             |             |
|-------------|-------------|-------------|-------------|-------------|-------------|
| 10.54391604 | 10.50162969 | 10.61581245 | 10.31235226 | 10.40874439 | 10.29975292 |
| 10.4411327  | 10.32521312 | 10.43003881 | 9.625115814 | 10.09793252 | 10.10246904 |
| 11.86558637 | 11.76574465 | 11.81376019 | 11.55126464 | 11.61889321 | 11.57082978 |
| 10.5119996  | 10.56159371 | 10.76025569 | 10.01017313 | 10.36390555 | 10.40936864 |
| 9.908310276 | 9.655594693 | 9.844757802 | 9.602640028 | 9.706564311 | 9.526253756 |
| 10.57293354 | 10.62769039 | 10.59324847 | 10.14152607 | 10.47895477 | 10.29866786 |
| 9.559294793 | 9.559051039 | 9.446586563 | 8.730467002 | 9.268552943 | 9.046829489 |
| 10.67219559 | 10.47541764 | 10.557062   | 10.1058019  | 10.42823403 | 10.44216737 |
| 11.0916835  | 10.86540622 | 10.91837311 | 10.26568092 | 10.65055775 | 10.7185518  |
| 8.775802444 | 8.949040101 | 8.88949462  | 8.460043452 | 8.78499624  | 8.768259074 |
| 9.009279907 | 9.18453419  | 9.278974808 | 8.420011459 | 8.591125469 | 8.765120122 |
| 9.778268635 | 9.657261305 | 9.478596408 | 8.983972632 | 9.50105369  | 9.475303874 |
| 9.910060664 | 9.907428167 | 9.977627008 | 9.42930025  | 9.719805043 | 9.633419177 |
| 9.904803115 | 10.03725383 | 9.998629112 | 9.557840241 | 9.776662482 | 9.809811467 |
| 9.652165149 | 9.665565609 | 9.384114491 | 9.194782712 | 9.318147381 | 9.271395154 |
| 9.858416773 | 9.706384907 | 9.743007942 | 9.120125403 | 9.482529562 | 9.598574426 |
| 11.146168   | 11.0152344  | 11.07430614 | 9.913530849 | 10.77628474 | 10.84062277 |
| 11.13573371 | 11.18428221 | 11.20122807 | 10.6982836  | 10.98369886 | 11.04467495 |
| 10.69977918 | 10.67617077 | 10.77034804 | 10.16835463 | 10.32284413 | 10.36028953 |
| 11.97624297 | 11.91321591 | 11.8651156  | 11.32826019 | 11.7817887  | 11.7699147  |
| 9.624713149 | 9.535683999 | 9.603203708 | 8.715110005 | 9.187001701 | 9.293350714 |
| 11.47421499 | 11.53910661 | 11.49394787 | 11.3224809  | 11.37122604 | 11.34401956 |
| 12.41513111 | 12.27956692 | 12.39717673 | 11.7958504  | 12.09950648 | 12.12243542 |
| 11.30559933 | 11.19177631 | 11.10937218 | 10.41435879 | 10.93116224 | 10.88756503 |
| 9.951445223 | 10.02181202 | 10.06338323 | 9.787048438 | 9.824025576 | 9.766517031 |
| 10.53600288 | 10.31680177 | 10.18477467 | 10.14398575 | 10.04210315 | 10.03500603 |
| 15.16783213 | 14.87465046 | 14.8390202  | 14.80847791 | 14.6312887  | 14.81473342 |
| 9.401508377 | 9.269800094 | 9.370909809 | 9.511604587 | 9.693200931 | 9.541010828 |
| 9.915299123 | 9.635443711 | 9.965128485 | 9.259730288 | 9.519342981 | 9.648828882 |
| 10.83583639 | 10.72863393 | 10.866225   | 10.5918023  | 10.55184147 | 10.65213716 |
| 9.74922846  | 9.760108337 | 9.915322579 | 9.340585981 | 9.497982806 | 9.531805362 |
| 10.98362376 | 10.79220776 | 10.8246282  | 10.45850359 | 10.53994654 | 10.43428437 |
| 10.7337803  | 10.67863461 | 10.58346911 | 10.16835463 | 10.58260691 | 10.44805149 |
| 10.62288453 | 10.67699252 | 10.58510361 | 9.540519472 | 10.50059642 | 10.1905089  |
| 10.38308187 | 10.14570915 | 10.2796819  | 9.483393818 | 10.04841418 | 9.958747955 |
| 9.609712049 | 9.747646327 | 9.695375163 | 8.891365077 | 9.534408916 | 9.60736483  |
| 10.45318824 | 10.39978257 | 10.59973141 | 9.999346869 | 10.27520853 | 10.12100323 |
| 9.652165149 | 9.599487701 | 9.66014088  | 8.811095786 | 9.136552417 | 9.351014046 |
| 10.7248577  | 10.660468   | 10.50188691 | 10.32902168 | 10.54143878 | 10.72583566 |
| 9.939496866 | 9.998334924 | 9.844757802 | 9.618055952 | 9.766490045 | 9.591503335 |
| 10.33046107 | 10.20843756 | 10.48447651 | 9.467770402 | 10.11807383 | 10.25905237 |
| 7.913804874 | 7.800539838 | 7.276749231 | 6.947525041 | 7.286085063 | 7.199574979 |
| 11.42976013 | 11.32093717 | 11.44618239 | 11.21623686 | 11.07514031 | 11.16387574 |
| 9.67705003  | 9.623557666 | 9.635112464 | 9.859678553 | 9.791787904 | 9.878232963 |
| 11.31157127 | 11.18370413 | 11.25919851 | 10.75462866 | 11.08949256 | 11.0257828  |
| 10.86410372 | 10.80353998 | 10.73618347 | 10.39452633 | 10.48826955 | 10.52707814 |
| 11.57309132 | 11.52685202 | 11.62326943 | 11.22206891 | 11.38458985 | 11.36490501 |

|             |             |             |             |             |             |
|-------------|-------------|-------------|-------------|-------------|-------------|
| 9.268654671 | 9.416751402 | 9.586980714 | 9.766975659 | 9.753672797 | 9.568279961 |
| 7.541660341 | 7.593295521 | 8.004625024 | 7.566837478 | 7.509904895 | 7.530570068 |
| 8.192210862 | 8.317261464 | 8.403326432 | 8.400942794 | 8.276811654 | 8.349150597 |
| 10.71787955 | 10.76309462 | 10.63881611 | 10.74871512 | 10.83221989 | 10.84285764 |
| 7.842268546 | 7.687646999 | 8.043189212 | 7.67056704  | 7.408885913 | 7.651094694 |
| 4.727844166 | 4.812658923 | 5.913365259 | 3.95345074  | 4.558900638 | 4.971638961 |
| 9.981722742 | 9.963734518 | 9.747393927 | 9.94019329  | 10.09995935 | 10.09623768 |
| 9.330087688 | 9.327460451 | 9.395337385 | 9.487273378 | 9.578685121 | 9.544676631 |
| 6.445624013 | 7.019244738 | 7.292841956 | 7.390244264 | 7.271772222 | 6.877903778 |
| 10.82752492 | 10.86684737 | 10.97806272 | 10.71105771 | 10.81381476 | 10.84360183 |
| 8.813699042 | 8.913221967 | 8.878872845 | 8.626421578 | 8.712665055 | 8.681013841 |
| 6.303700321 | 5.329928717 | 3.531904981 | 4.174877361 | 5.036273452 | 2.942211478 |
| 10.99521363 | 10.9268024  | 10.90010512 | 10.96074953 | 11.07204616 | 11.11663181 |
| 8.945849299 | 8.904828412 | 8.956693037 | 9.020127177 | 8.901133016 | 8.917088495 |
| 5.638959969 | 5.630667188 | 5.16664667  | 6.144554461 | 6.412779514 | 5.783149234 |
| 8.868740391 | 9.041274108 | 8.951633604 | 8.672583415 | 8.877696762 | 8.79004257  |
| 9.104079688 | 8.693684023 | 8.557810458 | 8.156496876 | 8.749283901 | 8.674336393 |
| 1.662934613 | 2.262061444 | 2.666415399 | 2.960193298 | 3.491138785 | 3.260203441 |
| 4.90681358  | 5.26145301  | 4.069091575 | 4.068407991 | 3.278533864 | 3.260203441 |
| 4.523486615 | 3.72105059  | 3.015764765 | 3.27942815  | 2.727313987 | 3.741118641 |
| 9.691370424 | 9.90602701  | 9.8420262   | 9.992083959 | 10.07132125 | 10.05442156 |
| 8.911309814 | 8.772687104 | 9.063734564 | 9.143258909 | 9.004291253 | 9.182425815 |
| 7.646176987 | 7.987029494 | 8.028848172 | 8.191794873 | 8.195739248 | 8.374089013 |
| 4.662889011 | 5.575326786 | 5.61364312  | 5.408575174 | 6.18733174  | 5.385472394 |
| 9.998273012 | 9.829748144 | 9.810235301 | 9.522988223 | 9.630083016 | 9.702323227 |
| 9.198772023 | 9.252263386 | 9.346061495 | 9.410354771 | 9.513272276 | 9.522540781 |
| 8.139469421 | 7.681108463 | 7.627040832 | 7.517103819 | 7.835978159 | 7.871434979 |
| 7.523480337 | 7.836289497 | 7.473132098 | 7.710941977 | 7.692916917 | 7.961947493 |
| 8.684666505 | 8.399220977 | 8.676025646 | 8.847770597 | 8.805013275 | 8.956149711 |
| 10.47463755 | 10.39379687 | 10.1520665  | 10.42787922 | 10.69011235 | 10.47711737 |
| 9.563749522 | 9.394941398 | 9.528719051 | 9.516675074 | 9.549319143 | 9.559247399 |
| 7.842268546 | 7.954866467 | 7.805894868 | 7.947100844 | 7.855304819 | 7.756011516 |
| 9.5139742   | 9.364658936 | 9.437567431 | 9.037870262 | 9.254064225 | 9.153908923 |
| 7.842268546 | 7.477322183 | 7.725179617 | 7.345351577 | 7.434811497 | 6.946016002 |
| 10.01626167 | 10.02439716 | 9.899645212 | 10.00927404 | 9.992778961 | 10.04668668 |
| 8.67234323  | 8.23036389  | 8.715363338 | 8.175857308 | 7.89319835  | 8.026289875 |
| 8.04704202  | 7.916413612 | 8.157458592 | 7.750217683 | 7.395746293 | 7.50821502  |
| 8.520209212 | 8.426841113 | 8.094586045 | 7.976839529 | 8.373813697 | 8.271639574 |
| 9.49310602  | 9.589047785 | 9.635112464 | 9.597863334 | 9.796794675 | 9.8577504   |
| 3.89069954  | 3.091832257 | 1           | 1.715872115 | 1           | 1           |
| 5.163152438 | 6.010356039 | 4.980472725 | 5.247116524 | 5.723677922 | 5.248330196 |
| 6.366241698 | 5.946363531 | 5.688540763 | 5.992715799 | 5.340507563 | 5.807764794 |
| 6.973377009 | 6.900433157 | 6.961480435 | 6.98459283  | 6.386451309 | 6.912361815 |
| 5.828585816 | 6.327496784 | 1.520899766 | 1.40189026  | 1.824050315 | 1.559564046 |
| 9.381460682 | 9.589047785 | 9.532112433 | 9.359052949 | 9.549319143 | 9.51695334  |
| 6.574828051 | 6.186883866 | 3.015764765 | 3.458731245 | 1.824050315 | 2.752371363 |
| 9.324848324 | 9.258864657 | 8.121867602 | 7.987835371 | 8.101769409 | 8.112792892 |

|             |             |             |             |             |             |
|-------------|-------------|-------------|-------------|-------------|-------------|
| 9.620443013 | 9.615007277 | 9.658589261 | 9.687146488 | 9.900439908 | 9.936597161 |
| 5.254163095 | 5.07453361  | 4.980472725 | 5.573367918 | 4.894007383 | 5.449445606 |
| 8.220699408 | 7.882618087 | 7.614290442 | 7.72852998  | 7.472846725 | 7.64427699  |
| 6.757031177 | 5.395301053 | 4.141971765 | 5.408575174 | 5.496356219 | 5.318530269 |
| 8.497104481 | 8.422927606 | 8.166220822 | 7.784253821 | 7.534091853 | 7.911734657 |
| 9.309015089 | 9.493391819 | 9.494338879 | 9.15955864  | 9.254064225 | 8.994181157 |
| 7.774705297 | 6.720829303 | 6.697035148 | 6.512608315 | 6.513535519 | 6.567871871 |
| 10.11517808 | 10.00881638 | 10.06689686 | 10.26115626 | 10.32804117 | 10.12957171 |
| 2.115432786 | 2.262061444 | 1           | 2.835884957 | 2.34524792  | 1.961732649 |
| 9.309015089 | 9.314844719 | 9.382235491 | 9.448000159 | 9.60175498  | 9.609116502 |
| 6.483735105 | 6.360608329 | 4.719818172 | 4.979745824 | 3.987925368 | 5.136177653 |
| 7.409309391 | 7.667941813 | 7.731097169 | 7.304890828 | 7.120245449 | 7.390928385 |
| 8.203673875 | 7.992320972 | 8.275536449 | 7.91289531  | 7.826216865 | 7.917400947 |
| 10.07829086 | 10.11086107 | 10.03615729 | 9.936414406 | 9.975219648 | 10.0007208  |
| 7.173179341 | 7.454499711 | 7.78897485  | 7.226599411 | 7.038063404 | 7.341206929 |
| 9.428626836 | 9.463222437 | 9.193694108 | 9.587057595 | 9.50105369  | 9.55198041  |
| 9.851146157 | 9.816384885 | 10.02776811 | 10.00837439 | 10.04420989 | 10.03630856 |
| 8.821160353 | 8.967964674 | 8.346639083 | 8.488709991 | 8.464702518 | 8.522746153 |
| 10.99273791 | 11.16391013 | 11.20972923 | 11.29912939 | 11.21261591 | 11.22683689 |
| 11.46709851 | 11.40219707 | 11.60001452 | 11.55126464 | 11.71128252 | 11.65038999 |
| 11.67851767 | 11.73016077 | 11.56978964 | 11.77695746 | 11.95302493 | 11.85172182 |
| 3.772519063 | 3.998540311 | 3.296794681 | 2.192163608 | 2.34524792  | 2.275883944 |
| 8.444932803 | 8.362914225 | 7.501105782 | 7.328150013 | 7.382485901 | 7.33275083  |
| 7.025981046 | 6.276359434 | 5.805328069 | 5.553769232 | 5.636998506 | 5.807764794 |
| 11.21575386 | 10.87044396 | 10.29374435 | 10.4419406  | 10.16529579 | 10.27679369 |
| 4.662889011 | 4.231169995 | 4.856024081 | 5.065284254 | 4.966893338 | 4.881751715 |
| 11.12522339 | 10.97035578 | 11.11334218 | 10.96400134 | 11.27583792 | 11.2628905  |
| 11.49126961 | 11.59843148 | 11.69162511 | 11.78275659 | 11.89584247 | 11.7699147  |
| 8.06600729  | 8.156868887 | 8.369581995 | 8.330706054 | 8.360349222 | 8.826637127 |
| 7.038837728 | 6.655623635 | 7.210520828 | 7.130645691 | 7.136134658 | 6.794149027 |
| 10.00484032 | 9.99174513  | 10.15647068 | 9.958940652 | 10.13002502 | 10.23882909 |
| 9.252188954 | 9.135157862 | 9.182940512 | 9.003969659 | 9.232054612 | 9.00486565  |
| 10.0081128  | 10.0850902  | 10.20935816 | 10.21433166 | 10.28414942 | 10.25458274 |
| 7.317331132 | 7.514575215 | 7.494163047 | 6.830239975 | 7.382485901 | 7.272128289 |
| 8.583000681 | 8.867881238 | 8.913111487 | 8.994914447 | 9.021502352 | 8.956149711 |
| 12.09718154 | 12.14022666 | 12.17506727 | 12.34419304 | 12.37570915 | 12.30020528 |
| 10.16733577 | 9.925520451 | 10.00107997 | 10.1058019  | 10.0230027  | 10.05827351 |
| 8.668211968 | 7.64124244  | 7.568755185 | 7.027852491 | 7.136134658 | 7.39905121  |
| 8.783461819 | 8.809124926 | 8.567764703 | 8.806962655 | 9.055320558 | 8.847562993 |
| 5.969546468 | 5.26145301  | 4.069091575 | 4.174877361 | 3.491138785 | 3.741118641 |
| 8.405768549 | 8.457772767 | 8.399615791 | 8.524389726 | 8.901133016 | 8.640477539 |
| 8.174843737 | 8.265753447 | 8.425392062 | 8.140162318 | 7.845673852 | 8.137278267 |
| 5.914803605 | 5.902068469 | 5.534643218 | 6.737734827 | 6.026142292 | 6.191277754 |
| 10.26631377 | 10.26308972 | 10.15096336 | 10.53296149 | 10.64778946 | 10.4313171  |
| 7.766999166 | 7.719902426 | 7.562131219 | 7.813390668 | 7.776394435 | 7.717556254 |
| 9.158106666 | 9.088979539 | 9.378470134 | 9.24910671  | 9.359340805 | 9.365595042 |
| 8.843315515 | 8.763432014 | 8.807857002 | 8.544388835 | 8.432895514 | 8.541213587 |

|             |             |             |             |             |             |
|-------------|-------------|-------------|-------------|-------------|-------------|
| 6.324850125 | 6.682060594 | 7.049357978 | 6.450374626 | 6.986408908 | 6.877903778 |
| 9.252188954 | 9.299985565 | 9.56229896  | 9.699461855 | 9.725067497 | 9.662389571 |
| 8.48306192  | 8.366993725 | 8.709380763 | 8.359212378 | 8.630918936 | 8.650718893 |
| 7.523480337 | 7.726267866 | 7.736990548 | 7.571717834 | 8.043987222 | 7.64427699  |
| 8.109313468 | 7.351204755 | 7.501105782 | 6.878304096 | 6.488998496 | 7.315688472 |
| 8.334563733 | 8.430744032 | 8.335029339 | 7.939569392 | 8.069034919 | 7.97287248  |
| 3.169860822 | 3.091832257 | 3.911259693 | 4.723235281 | 5.036273452 | 4.252298811 |
| 9.204488908 | 9.091447181 | 8.981727431 | 9.074435244 | 8.896476123 | 8.817575141 |
| 8.163148408 | 8.415068601 | 8.157458592 | 8.301625099 | 7.786497519 | 7.871434979 |
| 7.113660841 | 7.222033967 | 7.176230489 | 6.788925927 | 6.561392014 | 6.596409802 |
| 7.137763686 | 7.334635711 | 7.340070326 | 6.838362687 | 6.950915626 | 6.756710141 |
| 8.704974225 | 8.706618864 | 8.790960115 | 8.590804292 | 8.728472793 | 8.942320367 |
| 1           | 3.377164271 | 3.992332924 | 3.540664263 | 1.824050315 | 4.178715345 |
| 6.047952674 | 6.091489973 | 6.756267574 | 6.340286727 | 6.537662192 | 6.399945895 |
| 6.876435835 | 6.933818687 | 6.961480435 | 7.36797253  | 7.104179293 | 6.731199993 |
| 8.103205892 | 8.342341878 | 8.057389097 | 8.501554287 | 8.585350016 | 8.212950568 |
| 9.152202616 | 9.368733512 | 9.210734859 | 9.062349596 | 8.805013275 | 9.069908569 |
| 6.609713527 | 7.070176343 | 6.596894388 | 7.251144716 | 7.341957365 | 7.052843694 |
| 9.391519352 | 9.276321789 | 9.246291643 | 9.055397781 | 9.250419195 | 9.353106089 |
| 8.911309814 | 8.690432111 | 8.884193508 | 8.595604376 | 8.707357082 | 8.570278422 |
| 5.672346062 | 5.51777861  | 4.401452511 | 5.197460215 | 4.966893338 | 4.971638961 |
| 8.904301568 | 8.589301563 | 8.60690876  | 8.460043452 | 8.38715367  | 8.60580491  |
| 2.736907833 | 2.51828802  | 3.419133915 | 3.618193167 | 3.84055471  | 2.533710429 |
| 8.231939155 | 8.221379175 | 8.407027553 | 8.392692717 | 8.608314386 | 8.507800089 |
| 8.613400446 | 8.709834534 | 8.380918065 | 8.674853186 | 8.779948283 | 8.687660525 |
| 9.672932244 | 9.775535979 | 9.7546744   | 10.09228007 | 10.11807383 | 10.02191565 |
| 6.904804321 | 7.070176343 | 7.132188663 | 7.062937005 | 6.895982713 | 6.85446586  |
| 8.420580014 | 7.992320972 | 8.200747066 | 8.585988184 | 8.464702518 | 8.365824014 |
| 6.520865289 | 6.327496784 | 5.994323509 | 6.522724513 | 6.059853167 | 6.399945895 |
| 5.066011601 | 3.911841602 | 4.141971765 | 3.371863457 | 1           | 3.260203441 |
| 8.302937639 | 8.630608293 | 8.547787053 | 8.686148779 | 8.896476123 | 8.660888057 |
| 9.022285614 | 9.216537213 | 9.121192614 | 9.465149971 | 9.286461588 | 9.398379832 |
| 8.395809079 | 8.371061721 | 8.384677047 | 8.804891641 | 8.556120769 | 8.47743527  |
| 6.483735105 | 6.408892928 | 6.196043856 | 5.822996311 | 6.156502484 | 6.114429039 |
| 6.574828051 | 6.485940968 | 6.3268424   | 5.451571397 | 5.226392402 | 5.855770664 |
| 9.085611536 | 9.036159481 | 9.11215172  | 8.80281765  | 8.795039474 | 8.999533295 |
| 6.999918773 | 5.457839158 | 7.437384541 | 7.869956294 | 5.036273452 | 7.711046195 |
| 6.022287836 | 6.408892928 | 6.070979087 | 6.035736161 | 5.102469568 | 5.318530269 |
| 6.047952674 | 5.735359855 | 5.849518442 | 5.451571397 | 5.765139818 | 5.969229824 |
| 10.85776901 | 10.99230951 | 11.14803613 | 11.21116328 | 11.0543862  | 11.14950323 |
| 7.419176413 | 7.099894    | 7.347793566 | 7.532204757 | 7.649294063 | 7.581422925 |
| 10.09838843 | 9.831225339 | 10.00352667 | 9.803737877 | 9.730310825 | 9.602097018 |
| 6.876435835 | 6.987799746 | 6.721020726 | 6.512608315 | 6.513535519 | 6.246341787 |
| 8.704974225 | 8.902019674 | 8.768118616 | 8.546869343 | 8.367097167 | 8.566677179 |
| 8.736883465 | 8.951758858 | 9.070751581 | 8.712902742 | 8.445702588 | 8.67767898  |
| 6.847498316 | 7.019244738 | 6.63526632  | 6.813856053 | 7.038063404 | 6.968023745 |
| 7.089148463 | 6.770951703 | 7.26047497  | 6.737734827 | 6.386451309 | 6.877903778 |

|             |             |             |             |             |             |
|-------------|-------------|-------------|-------------|-------------|-------------|
| 11.0406639  | 10.96498297 | 10.97120401 | 10.80523415 | 10.87190318 | 10.76328737 |
| 3.169860822 | 3.501126557 | 3.8253578   | 2.835884957 | 2.34524792  | 3.109951065 |
| 9.04476724  | 8.853414973 | 8.865484702 | 8.63344072  | 8.514178671 | 8.541213587 |
| 7.735756306 | 7.738915105 | 7.601426359 | 7.110664642 | 7.395746293 | 7.103430536 |
| 7.241504561 | 7.439081653 | 7.508015266 | 6.969879803 | 7.120245449 | 7.113338481 |
| 7.467523966 | 7.572248791 | 7.614290442 | 7.675109349 | 8.043987222 | 7.945403307 |
| 7.467523966 | 7.981718538 | 7.514891816 | 7.675109349 | 7.604310945 | 7.73691201  |
| 7.885614555 | 7.800539838 | 8.080749334 | 7.356706389 | 7.382485901 | 7.774861468 |
| 1.662934613 | 2.262061444 | 1.902806559 | 2.549633394 | 3.491138785 | 2.275883944 |
| 10.90680817 | 10.90872629 | 11.13079344 | 11.10659534 | 11.16015884 | 11.06778825 |
| 11.04146264 | 11.07692881 | 11.18784391 | 11.23173689 | 11.18232792 | 11.17041559 |
| 6.626844947 | 6.168303034 | 4.898710929 | 5.493323212 | 4.650252065 | 4.178715345 |
| 8.059713194 | 7.732605344 | 7.731097169 | 7.591075821 | 7.182778534 | 7.515705258 |
| 6.817968469 | 7.0801504   | 7.292841956 | 6.657372381 | 6.819325541 | 7.052843694 |
| 8.36551138  | 8.491796128 | 8.824558281 | 8.198120926 | 8.180496531 | 8.289227709 |
| 8.151357495 | 7.987029494 | 8.432672907 | 8.387166339 | 8.544261217 | 8.511551146 |
| 7.797579751 | 7.997593112 | 7.607872738 | 7.428411156 | 7.509904895 | 7.637426915 |
| 10.19344299 | 10.28373656 | 10.31261247 | 10.54355761 | 10.43788099 | 10.42337442 |
| 5.569776566 | 5.709890283 | 5.392529877 | 5.222502    | 5.723677922 | 4.881751715 |
| 3.999927798 | 2.924770305 | 3.531904981 | 2.549633394 | 1           | 1.559564046 |
| 10.03081463 | 10.14689592 | 9.990018182 | 9.992993824 | 10.07956174 | 9.803705527 |
| 5.604782933 | 5.968011289 | 5.392529877 | 4.723235281 | 4.817242336 | 5.417813565 |
| 6.693406036 | 6.615037045 | 6.672644045 | 6.104703228 | 5.844651476 | 5.879187565 |
| 9.110183573 | 9.186843813 | 9.367114738 | 8.956249429 | 8.933317037 | 8.964384129 |
| 11.09091209 | 11.07193925 | 10.91902128 | 10.79117985 | 10.97046605 | 11.04143528 |
| 7.703821849 | 7.099894    | 7.415502964 | 7.062937005 | 7.038063404 | 7.349613753 |
| 9.091793892 | 9.271977269 | 9.272902847 | 9.361873156 | 9.071936959 | 9.205766731 |
| 1.662934613 | 1.552010398 | 1.520899766 | 2.38194199  | 1.824050315 | 2.275883944 |
| 7.409309391 | 6.97716391  | 6.530582176 | 5.789872457 | 5.544776471 | 6.431967789 |
| 9.403994863 | 9.245631771 | 9.080054827 | 9.178878302 | 9.205945018 | 9.22417133  |
| 10.98362376 | 11.15391035 | 11.25766198 | 11.36597416 | 11.23676514 | 11.30240217 |
| 11.6128628  | 11.70177487 | 11.70934423 | 11.6632425  | 11.89292298 | 11.76873974 |
| 10.5027494  | 10.59415074 | 10.59568299 | 10.73627155 | 10.75586225 | 10.7177402  |
| 9.970023539 | 9.99174513  | 9.92954536  | 10.17558574 | 10.22222934 | 9.965600906 |
| 10.50042756 | 10.61058799 | 10.5875519  | 10.69772563 | 10.80514467 | 10.75460882 |
| 10.3186487  | 10.4322672  | 10.41908366 | 10.79274822 | 10.73384184 | 10.60901979 |
| 9.83833374  | 9.85755942  | 9.859689861 | 9.992993824 | 10.06303343 | 9.935201379 |
| 8.292239643 | 8.383197337 | 8.380918065 | 8.023894442 | 8.28396087  | 8.092900914 |
| 9.885359834 | 10.025688   | 9.898331043 | 10.08973056 | 10.12605228 | 10.17403571 |
| 8.591751889 | 8.610102758 | 8.580931084 | 8.226249831 | 8.225749887 | 8.132414325 |
| 5.297602228 | 4.49246866  | 4.211346654 | 3.618193167 | 2.34524792  | 3.839901004 |
| 6.073168917 | 6.455613719 | 6.516945969 | 6.805593785 | 6.914527064 | 6.638185375 |
| 7.196315822 | 7.763881753 | 7.514891816 | 7.788452429 | 8.18813802  | 7.888844291 |
| 7.646176987 | 7.776204901 | 7.67080017  | 7.666010385 | 7.447601649 | 7.477859025 |
| 7.184793961 | 5.546839624 | 2.453859607 | 2.549633394 | 2.727313987 | 2.752371363 |
| 9.483733491 | 9.398931456 | 9.359494513 | 9.164412865 | 9.250419195 | 9.20112866  |
| 2.969564903 | 2.51828802  | 4.211346654 | 4.174877361 | 3.676399415 | 3.741118641 |

|             |             |             |             |             |             |
|-------------|-------------|-------------|-------------|-------------|-------------|
| 4.727844166 | 3.501126557 | 1.520899766 | 2.192163608 | 1.824050315 | 1.961732649 |
| 5.497107678 | 3.377164271 | 2.453859607 | 2.38194199  | 2.34524792  | 3.520607779 |
| 9.140321533 | 8.970648033 | 9.167749531 | 8.963694529 | 9.140496385 | 8.967118524 |
| 9.941209845 | 10.06388555 | 9.947446624 | 9.593070772 | 9.682420382 | 9.892687346 |
| 4.662889011 | 4.231169995 | 3.531904981 | 4.5361587   | 5.805443346 | 4.785889718 |
| 7.230339378 | 7.454499711 | 4.898710929 | 5.222502    | 5.680989096 | 5.056252732 |
| 8.728972076 | 8.243736912 | 7.514891816 | 7.532204757 | 7.257315961 | 7.199574979 |
| 11.34883008 | 11.24649782 | 11.0425365  | 10.84306592 | 11.16112983 | 11.10302202 |
| 9.21585516  | 9.147068325 | 8.946556365 | 9.279254616 | 9.549319143 | 9.440309376 |
| 4.448385543 | 4.157717108 | 3.992332924 | 5.430233455 | 4.894007383 | 5.174538761 |
| 3.999927798 | 4.55101495  | 4.898710929 | 4.321157665 | 4.121627621 | 4.628980122 |
| 6.946337782 | 6.733524099 | 6.311126551 | 6.638889421 | 7.766220101 | 7.298421905 |
| 7.679398388 | 7.818525399 | 7.581912571 | 8.146718351 | 8.093655154 | 8.208335571 |
| 6.626844947 | 6.360608329 | 6.530582176 | 6.620166592 | 7.271772222 | 6.968023745 |
| 3.643786876 | 3.501126557 | 3.296794681 | 4.01207407  | 3.278533864 | 3.109951065 |
| 3.772519063 | 2.51828802  | 2.204484772 | 2.960193298 | 1.824050315 | 2.533710429 |
| 9.572617927 | 9.683668544 | 9.817206205 | 9.589465874 | 9.362721082 | 9.390253215 |
| 7.274490835 | 7.317874162 | 7.26047497  | 7.412177396 | 7.546034951 | 8.021036264 |
| 8.879501084 | 8.693684023 | 8.93378454  | 8.541904055 | 8.680520271 | 8.595238519 |
| 5.066011601 | 4.607277728 | 3.531904981 | 3.371863457 | 3.029091357 | 1.961732649 |
| 8.768102187 | 8.9544725   | 8.841068429 | 8.89526366  | 8.78499624  | 8.581028527 |
| 8.96281382  | 8.616970371 | 9.008772625 | 8.638101247 | 8.800034994 | 8.88274452  |
| 8.435240961 | 8.278803879 | 8.255147521 | 7.96946213  | 8.172814352 | 7.853813016 |
| 6.215857103 | 6.091489973 | 5.892395377 | 6.063719846 | 5.544776471 | 5.385472394 |
| 10.01788593 | 9.966425749 | 9.848845533 | 9.643774937 | 9.992778961 | 9.862164068 |
| 10.47226998 | 10.55624426 | 10.56702139 | 10.60792788 | 10.67930861 | 10.64105001 |
| 10.04681427 | 10.10842644 | 10.03017    | 10.11836454 | 10.22780105 | 10.27016624 |
| 5.163152438 | 4.431445628 | 4.980472725 | 3.95345074  | 3.84055471  | 3.260203441 |
| 5.828585816 | 5.603262322 | 4.069091575 | 3.691767369 | 4.558900638 | 2.533710429 |
| 13.9197895  | 14.09778925 | 14.17934109 | 14.31995465 | 14.43613012 | 14.3366526  |
| 8.744751706 | 8.812120274 | 8.788124627 | 8.815217109 | 9.030031512 | 9.069908569 |
| 9.793520979 | 9.962387017 | 10.0229523  | 10.22908    | 10.24804849 | 10.09498817 |
| 7.369152291 | 7.627705145 | 7.984949345 | 8.120313546 | 8.312208637 | 8.026289875 |
| 8.556423977 | 8.660830267 | 8.969264535 | 8.910753488 | 9.096508139 | 8.908578844 |
| 10.23033842 | 10.1265868  | 10.16523889 | 10.03423921 | 10.31064438 | 10.28995795 |
| 8.748669793 | 8.754117167 | 8.832836972 | 9.111772708 | 9.198397513 | 8.986115537 |
| 10.18623824 | 10.26089908 | 10.18477467 | 10.30064149 | 10.29126246 | 10.15737225 |
| 10.5551458  | 10.49325621 | 10.54283412 | 10.60257269 | 10.8261109  | 10.64019362 |
| 9.99002161  | 10.07390304 | 10.03973777 | 10.13081873 | 10.19783349 | 10.23656445 |
| 6.626844947 | 6.854682249 | 6.697035148 | 7.245047429 | 7.271772222 | 6.978902989 |
| 6.904804321 | 6.708021809 | 6.981476577 | 7.379151374 | 7.447601649 | 7.30708102  |
| 7.842268546 | 7.824471101 | 7.887640503 | 7.82160853  | 7.776394435 | 7.871434979 |
| 5.380743228 | 5.657561172 | 6.161403507 | 5.408575174 | 5.340507563 | 5.807764794 |
| 8.839646535 | 8.812120274 | 8.966758984 | 9.0915267   | 9.038510545 | 8.902877729 |
| 12.18293252 | 12.22132846 | 12.20964986 | 12.28803095 | 12.29617915 | 12.25868095 |
| 10.46276065 | 10.19587886 | 9.764805731 | 9.779685656 | 9.776662482 | 9.690789652 |
| 9.668802671 | 9.757002912 | 9.384114491 | 9.30439413  | 9.649586794 | 9.5968099   |

|             |             |              |             |             |             |
|-------------|-------------|--------------|-------------|-------------|-------------|
| 4.523486615 | 4.607277728 | 4.277538014  | 4.453961963 | 5.036273452 | 4.101176152 |
| 8.370605389 | 7.954866467 | 7.777583578  | 7.561940557 | 7.911778296 | 7.454665375 |
| 7.805124677 | 7.876907723 | 7.887640503  | 8.113636136 | 8.018496959 | 8.151772472 |
| 8.103205892 | 7.893971453 | 8.004625024  | 7.566837478 | 7.546034951 | 7.567075519 |
| 8.578605091 | 8.654168773 | 8.75074699   | 8.843741356 | 8.887116999 | 8.969847747 |
| 5.254163095 | 4.99241264  | 4.94017096   | 5.092705987 | 4.121627621 | 4.971638961 |
| 10.36149591 | 10.40772505 | 10.65990852  | 10.62328771 | 10.86357624 | 10.87305898 |
| 7.892713944 | 7.882618087 | 7.701263658  | 7.688651093 | 7.826216865 | 7.493116862 |
| 10.59159576 | 10.57840394 | 10.6482286   | 10.37999277 | 10.75714716 | 10.63332408 |
| 10.10604432 | 10.025688   | 9.661690833  | 9.590668508 | 9.814182797 | 9.796036579 |
| 7.98860282  | 7.732605344 | 8.080749334  | 7.666010385 | 7.63817909  | 7.33275083  |
| 3.772519063 | 3.72105059  | 4.401452511  | 5.703574518 | 3.84055471  | 4.252298811 |
| 12.6124021  | 12.66990273 | 12.51761425  | 12.43218938 | 12.57319277 | 12.50928824 |
| 8.078513698 | 8.221379175 | 7.805894868  | 7.675109349 | 7.835978159 | 7.994477353 |
| 10.98029519 | 10.9730347  | 11.111107495 | 11.14065887 | 11.39618249 | 11.34138749 |
| 10.07829086 | 10.15281519 | 10.00474846  | 10.31817219 | 10.33837944 | 10.08872435 |
| 7.93459191  | 7.960277013 | 7.944774196  | 8.204419361 | 8.018496959 | 8.026289875 |
| 10.2387204  | 10.07265465 | 10.15537089  | 10.1594671  | 10.36559134 | 10.30948182 |
| 11.51101128 | 11.4653949  | 11.76592344  | 11.76901179 | 11.80184998 | 11.76285056 |
| 8.157264997 | 8.304555835 | 8.475602818  | 8.578733742 | 8.477231534 | 8.555819197 |
| 8.226330227 | 8.133112098 | 8.174930154  | 7.697608819 | 7.766220101 | 7.888844291 |
| 9.628970683 | 9.467028293 | 9.525317669  | 9.727066416 | 9.850752    | 9.782128899 |
| 12.99827287 | 13.01613801 | 13.17285435  | 13.19154703 | 13.20017681 | 13.19010324 |
| 9.221504881 | 9.601220366 | 9.786279071  | 9.634475541 | 9.826475814 | 9.774344083 |
| 10.29204749 | 10.25430714 | 10.37346619  | 10.34193427 | 10.37063692 | 10.36132923 |
| 12.07550809 | 12.04126857 | 12.07973674  | 12.23152239 | 12.22181328 | 12.22480742 |
| 10.16733577 | 10.18552162 | 10.10385258  | 10.30504418 | 10.4346725  | 10.37580686 |
| 7.137763686 | 7.35941846  | 7.347793566  | 7.263262524 | 7.724789689 | 7.72403707  |
| 9.235533139 | 9.329552389 | 9.127936296  | 9.10673778  | 9.108638559 | 9.37386135  |
| 10.46156757 | 10.4322672  | 10.42365842  | 10.4936436  | 10.70350424 | 10.57805208 |
| 7.025981046 | 6.746108163 | 6.5440907    | 6.196032832 | 6.412779514 | 6.756710141 |
| 10.58064724 | 10.55177119 | 10.60538019  | 10.67579473 | 10.64640331 | 10.73869463 |
| 6.946337782 | 6.81939105  | 6.930956757  | 6.049795852 | 6.276053451 | 6.281917164 |
| 4.101465124 | 4.36772701  | 3.531904981  | 2.549633394 | 3.029091357 | 2.752371363 |
| 4.727844166 | 3.72105059  | 2.204484772  | 2.699847117 | 1.824050315 | 2.275883944 |
| 7.797579751 | 7.738915105 | 7.924259142  | 7.591075821 | 7.257315961 | 7.382759567 |
| 7.620749071 | 7.634489671 | 7.347793566  | 7.693136908 | 7.581282249 | 7.567075519 |
| 7.594864927 | 7.431310391 | 7.514891816  | 7.041988846 | 7.369102495 | 7.032101622 |
| 9.361130475 | 9.513773254 | 9.6877884    | 9.664481968 | 9.888763739 | 9.694094379 |
| 9.358568936 | 9.29571183  | 9.684742488  | 9.703914233 | 9.632885465 | 9.833980043 |
| 8.487757977 | 8.797080952 | 8.577650737  | 8.600388542 | 8.723222769 | 8.786950707 |
| 9.727554556 | 9.539303655 | 9.663239122  | 9.530527717 | 9.682420382 | 9.739582872 |
| 10.38811432 | 10.45831202 | 10.49581714  | 10.64139015 | 10.59271797 | 10.50654932 |
| 8.415659735 | 8.640752791 | 8.679089998  | 8.790310696 | 8.986872346 | 8.733349146 |
| 7.089148463 | 7.039833643 | 6.196043856  | 6.418221226 | 5.723677922 | 5.680258918 |
| 7.948285383 | 7.842162587 | 7.939672717  | 7.684151287 | 7.382485901 | 7.431092749 |
| 6.999918773 | 7.099894    | 7.26047497   | 7.586260621 | 7.485305515 | 7.574267058 |

|             |             |             |             |             |             |
|-------------|-------------|-------------|-------------|-------------|-------------|
| 7.149665765 | 7.687646999 | 7.020656134 | 7.263262524 | 6.968771416 | 6.53875802  |
| 7.013008761 | 7.484850142 | 7.184879784 | 7.661439291 | 7.735259366 | 7.415160931 |
| 9.550343855 | 9.551901407 | 9.528719051 | 9.674725087 | 9.738140258 | 9.829479168 |
| 3.169860822 | 3.377164271 | 2.666415399 | 4.723235281 | 3.676399415 | 2.752371363 |
| 8.44009502  | 8.491796128 | 8.436299597 | 8.754273929 | 8.53829468  | 8.660888057 |
| 7.629274937 | 7.521911764 | 7.78897485  | 8.162979264 | 7.592842545 | 7.911734657 |
| 11.16534801 | 11.23091387 | 11.16179296 | 11.10827577 | 11.21542308 | 11.30672629 |
| 8.659913784 | 8.62721088  | 8.685199243 | 8.605156896 | 8.445702588 | 8.357511393 |
| 5.569776566 | 5.034057356 | 5.805328069 | 4.82484461  | 4.24398311  | 4.514011558 |
| 7.486418266 | 8.358823157 | 8.279579883 | 8.717313895 | 8.240524304 | 8.630162965 |
| 11.54182081 | 11.59929871 | 11.75616276 | 11.79715327 | 11.85502211 | 11.7843277  |
| 6.609713527 | 6.149479768 | 4.94017096  | 5.341578351 | 5.102469568 | 4.785889718 |
| 11.94114858 | 11.95886545 | 11.92989948 | 11.91680949 | 12.00532619 | 11.8958008  |
| 10.53032393 | 10.55802962 | 10.41449435 | 10.54975446 | 10.71412896 | 10.58251695 |
| 8.231939155 | 8.291737315 | 8.11283095  | 7.679637402 | 7.786497519 | 7.97287248  |
| 7.842268546 | 7.579298539 | 7.676944545 | 7.889632595 | 8.009899129 | 8.021036264 |
| 9.72158654  | 9.562612612 | 9.565614359 | 9.630972755 | 9.791787904 | 9.794497886 |
| 8.174843737 | 8.480543926 | 8.335029339 | 8.544388835 | 8.596877893 | 8.414718351 |
| 8.529348484 | 8.161573659 | 8.403326432 | 8.49386144  | 8.596877893 | 8.623245384 |
| 10.03563318 | 9.783188372 | 9.553976973 | 9.466460781 | 9.379504676 | 9.539174428 |
| 8.115395296 | 8.422927606 | 8.361974825 | 7.81750545  | 7.660324057 | 8.132414325 |
| 10.6345774  | 10.66710054 | 10.77034804 | 10.85262152 | 10.96269048 | 10.84657476 |
| 5.942434672 | 4.30106361  | 2.666415399 | 1.715872115 | 1           | 1.559564046 |
| 8.420580014 | 8.434636421 | 8.574362913 | 8.49899456  | 8.305198378 | 7.945403307 |
| 7.338283488 | 7.543700181 | 7.588446538 | 7.916736221 | 7.604310945 | 7.799617633 |
| 9.894230187 | 10.00358517 | 10.08202447 | 10.19785352 | 10.23703967 | 10.09997972 |
| 9.474299676 | 9.267619628 | 9.378470134 | 9.271776496 | 9.352556397 | 9.355195104 |
| 7.064212394 | 6.746108163 | 6.991371668 | 6.729023555 | 6.759035418 | 6.678785233 |
| 9.028744763 | 9.084031557 | 9.073083023 | 8.817273365 | 8.33303732  | 8.390478307 |
| 7.612172519 | 7.507201167 | 7.627040832 | 7.465594302 | 7.983793861 | 7.950939142 |
| 8.459349571 | 8.426841113 | 8.407027553 | 7.763075517 | 8.247855159 | 8.231264327 |
| 9.507051625 | 9.485908413 | 9.471544234 | 9.384238521 | 9.751095626 | 9.605611029 |
| 11.40452694 | 11.38520132 | 11.31246465 | 11.31994516 | 11.78368134 | 11.6059043  |
| 9.699490135 | 9.632057679 | 9.197973203 | 9.07099252  | 9.261326772 | 9.286799058 |
| 12.56263694 | 12.83085298 | 12.92000935 | 12.88773794 | 12.76454705 | 12.83906908 |
| 8.318837345 | 8.044194949 | 8.047938053 | 7.837905142 | 8.001249753 | 8.015763452 |
| 8.914801212 | 9.103722474 | 9.096192533 | 8.969253247 | 8.951390605 | 9.051990174 |
| 7.711871977 | 7.738915105 | 6.991371668 | 7.083585342 | 7.581282249 | 6.957061838 |
| 6.626844947 | 5.603262322 | 5.095033568 | 5.037331193 | 3.278533864 | 4.019231643 |
| 8.133488447 | 8.422927606 | 8.057389097 | 7.905182675 | 8.45839697  | 7.917400947 |
| 9.993327836 | 9.926902812 | 10.07040195 | 9.884406332 | 10.14187801 | 10.09623768 |
| 7.955083687 | 7.558045101 | 7.664629513 | 7.245047429 | 7.581282249 | 7.61667935  |
| 7.137763686 | 7.060132851 | 7.252268475 | 7.595875003 | 7.328190834 | 7.254329153 |
| 8.756474188 | 8.899205456 | 8.93121655  | 8.994914447 | 9.108638559 | 9.102606434 |
| 5.736886172 | 6.655623635 | 6.878603453 | 7.163344514 | 7.213057172 | 6.830640875 |
| 10.86139225 | 10.78536545 | 10.83153008 | 10.93446775 | 11.13270235 | 11.03688749 |
| 6.862039628 | 6.485940968 | 6.609798764 | 6.439736251 | 5.956261216 | 6.333687577 |



|             |             |             |             |             |             |
|-------------|-------------|-------------|-------------|-------------|-------------|
| 7.586132639 | 7.565164426 | 7.48718674  | 7.281250504 | 7.120245449 | 7.00041841  |
| 9.797309002 | 9.907428167 | 9.898331043 | 9.528018928 | 9.761376802 | 9.642000436 |
| 8.248636274 | 7.806559973 | 7.924259142 | 7.675109349 | 7.522049061 | 7.581422925 |
| 7.968584936 | 8.074447014 | 7.892928988 | 8.378836876 | 8.393777685 | 8.052274737 |
| 8.180656039 | 7.981718538 | 7.959971284 | 8.216934335 | 8.477231534 | 8.319500246 |
| 8.736883465 | 8.999840203 | 9.330554741 | 9.24910671  | 9.745927431 | 9.314977147 |
| 5.828585816 | 4.905333542 | 3.531904981 | 4.366797664 | 4.461371462 | 4.252298811 |
| 6.677051441 | 7.185541663 | 6.63526632  | 7.156863771 | 7.003833377 | 7.00041841  |
| 6.574828051 | 5.575326786 | 5.451065511 | 5.318536384 | 4.736161969 | 4.628980122 |
| 6.260447187 | 5.362985128 | 3.911259693 | 3.892344006 | 3.278533864 | 2.752371363 |
| 8.783461819 | 8.967964674 | 9.003892878 | 8.526904828 | 9.008613315 | 8.796206488 |
| 5.380743228 | 5.26145301  | 5.534643218 | 4.575565097 | 5.544776471 | 5.569463256 |
| 8.415659735 | 8.480543926 | 8.11283095  | 8.549345593 | 8.790026597 | 8.450331464 |
| 8.380739763 | 8.207796308 | 8.17058206  | 8.31914392  | 8.630918936 | 8.533854956 |
| 10.1392558  | 10.20274261 | 10.22201995 | 10.29179561 | 10.41201101 | 10.2679503  |
| 3.345708554 | 3.091832257 | 2.204484772 | 3.074635247 | 1           | 1.559564046 |
| 9.849322763 | 9.860455976 | 10.06806617 | 9.915451736 | 9.850752    | 9.774344083 |
| 11.87188692 | 11.89567382 | 11.98541523 | 11.98081357 | 12.17979187 | 12.0388024  |
| 9.735473701 | 9.482152104 | 9.796191624 | 10.00477016 | 10.47427474 | 10.16095923 |
| 8.425483569 | 8.30880349  | 8.392165755 | 8.576307465 | 8.406935165 | 8.442493064 |
| 8.06600729  | 7.788423678 | 8.085376332 | 8.283890926 | 8.452063741 | 8.418719055 |
| 7.995214197 | 7.770056484 | 7.633374018 | 7.281250504 | 7.227961475 | 7.477859025 |
| 9.867453817 | 10.06514155 | 10.00107997 | 10.13412177 | 9.869883056 | 9.985966586 |
| 6.847498316 | 6.051493279 | 6.446761896 | 6.629558379 | 6.125000019 | 6.447716088 |
| 7.369152291 | 7.521911764 | 6.86790089  | 7.444464279 | 7.355593773 | 7.407128556 |
| 6.832808945 | 6.955654079 | 6.756267574 | 6.233470919 | 5.544776471 | 6.49395509  |
| 8.872336214 | 8.738457514 | 8.802246666 | 8.779804767 | 9.217192754 | 9.057132465 |
| 6.832808945 | 6.720829303 | 7.210520828 | 6.629558379 | 6.779413358 | 6.31663636  |
| 9.854786045 | 10.16223579 | 10.11747051 | 10.15296887 | 10.15363442 | 10.18347198 |
| 10.85776901 | 10.82371635 | 11.08300829 | 11.08029525 | 11.0710133  | 11.08236354 |
| 6.862039628 | 6.515643804 | 6.5440907   | 6.657372381 | 7.038063404 | 6.553388384 |
| 9.448034025 | 9.230038416 | 9.450178487 | 9.771224778 | 9.826475814 | 9.782128899 |
| 6.557063793 | 7.039833643 | 7.132188663 | 7.310740873 | 7.522049061 | 7.042509934 |
| 9.358568936 | 9.426557082 | 9.666330724 | 9.822285572 | 9.581589109 | 9.805234436 |
| 7.899778568 | 7.992320972 | 8.14864282  | 8.038069443 | 7.992548208 | 8.170874306 |
| 6.502419644 | 6.327496784 | 6.647833469 | 5.978085801 | 6.561392014 | 6.012227628 |
| 5.942434672 | 4.55101495  | 4.766663576 | 5.247116524 | 5.284577982 | 5.248330196 |
| 7.089148463 | 6.500868827 | 5.736396015 | 5.773020902 | 6.059853167 | 5.174538761 |
| 7.78999516  | 6.708021809 | 5.871116192 | 5.295120421 | 5.102469568 | 5.352389568 |
| 10.49577262 | 10.4885832  | 10.30866069 | 10.57852835 | 10.63666284 | 10.54365986 |
| 6.741386012 | 5.809176966 | 6.178827647 | 6.720259364 | 5.991624824 | 6.172445927 |
| 1           | 1           | 1           | 2.835884957 | 1           | 2.752371363 |
| 7.577347176 | 7.593295521 | 7.588446538 | 7.281250504 | 7.087932204 | 7.30708102  |
| 8.904301568 | 9.17059826  | 9.032926812 | 9.133389936 | 9.232054612 | 9.312829034 |
| 7.025981046 | 6.746108163 | 5.805328069 | 5.871298359 | 5.680989096 | 4.452898434 |
| 9.260445303 | 8.623805447 | 7.562131219 | 7.666010385 | 7.745653611 | 7.523156808 |
| 8.420580014 | 7.138588647 | 3.992332924 | 4.411037997 | 3.676399415 | 4.683201781 |

|             |             |             |             |             |             |
|-------------|-------------|-------------|-------------|-------------|-------------|
| 1           | 1           | 1.520899766 | 1.715872115 | 3.491138785 | 2.533710429 |
| 10.71587957 | 10.69657531 | 10.55789458 | 10.77540169 | 11.0322682  | 10.8817801  |
| 8.478350527 | 8.613540651 | 8.597221865 | 8.384395192 | 8.380499102 | 8.442493064 |
| 6.122316484 | 6.424635239 | 5.954412191 | 6.091171049 | 5.723677922 | 5.879187565 |
| 10.47818163 | 10.62513792 | 10.63408673 | 10.71437157 | 10.62544974 | 10.7506467  |
| 8.410722619 | 8.321471928 | 7.430127496 | 7.433782069 | 7.408885913 | 7.637426915 |
| 9.683204756 | 9.822339398 | 9.873131639 | 9.40762785  | 9.81911258  | 9.77590441  |
| 8.163148408 | 8.387219962 | 8.354327331 | 8.63344072  | 8.305198378 | 8.442493064 |
| 6.946337782 | 6.998357746 | 7.176230489 | 6.562494536 | 6.332308105 | 5.990888907 |
| 7.719877435 | 7.745197389 | 7.839150978 | 7.527188653 | 7.546034951 | 7.446850551 |
| 8.843315515 | 8.395231721 | 8.15305744  | 8.327824196 | 8.53829468  | 8.226707636 |
| 8.596107666 | 8.585805351 | 8.541065885 | 8.847770597 | 8.477231534 | 8.4850866   |
| 9.609712049 | 9.73980255  | 9.548960641 | 9.742297334 | 9.957443981 | 9.758647284 |
| 9.881796366 | 9.655594693 | 9.326651869 | 9.103371373 | 8.928763044 | 9.163477321 |
| 2.115432786 | 3.615275167 | 1           | 1           | 1           | 1           |
| 4.448385543 | 4.30106361  | 2.851638739 | 1.715872115 | 2.34524792  | 1           |
| 6.073168917 | 6.031071278 | 6.178827647 | 6.492160594 | 6.412779514 | 6.114429039 |
| 8.717023048 | 8.488055137 | 8.319402904 | 7.581429295 | 8.035540411 | 8.382306933 |
| 7.089148463 | 7.415641146 | 6.878603453 | 7.517103819 | 7.382485901 | 7.227211809 |
| 9.583627316 | 9.49525662  | 9.50128077  | 9.517939915 | 9.676999747 | 9.526253756 |
| 7.149665765 | 6.866256711 | 6.3268424   | 6.429018845 | 6.464036922 | 6.094559763 |
| 6.502419644 | 5.034057356 | 4.211346654 | 4.068407991 | 1.824050315 | 2.942211478 |
| 6.709577309 | 6.60125042  | 6.357769641 | 6.208620451 | 5.226392402 | 5.807764794 |
| 7.78999516  | 7.719902426 | 7.658432351 | 8.153244726 | 8.018496959 | 7.865584875 |
| 10.67116377 | 10.72227894 | 10.68756045 | 10.42585922 | 10.56363913 | 10.45488609 |
| 8.832280463 | 8.713043054 | 8.918307589 | 8.259901079 | 8.863450061 | 8.633609357 |
| 6.677051441 | 6.241232271 | 6.089523066 | 6.69364274  | 6.759035418 | 6.651846005 |
| 7.137763686 | 7.176272512 | 6.790673794 | 6.862459978 | 7.724789689 | 7.637426915 |
| 7.871310103 | 8.304555835 | 8.179265183 | 7.873913081 | 7.703619605 | 7.704506626 |
| 10.05157976 | 10.07390304 | 10.15537089 | 10.00206106 | 10.25534131 | 10.08997929 |
| 9.574826536 | 9.696693088 | 9.692345244 | 9.69387699  | 10.00147912 | 9.921168778 |
| 7.274490835 | 7.060132851 | 7.158774763 | 6.797283927 | 7.136134658 | 6.731199993 |
| 7.523480337 | 7.212997062 | 7.422833761 | 6.183334418 | 7.213057172 | 6.806415822 |
| 5.497107678 | 4.607277728 | 5.16664667  | 5.451571397 | 5.226392402 | 5.680258918 |
| 4.523486615 | 3.72105059  | 3.163111837 | 1.973584608 | 2.727313987 | 2.533710429 |
| 7.577347176 | 7.383782668 | 7.480176534 | 6.893976097 | 6.584737829 | 6.830640875 |
| 9.343103453 | 9.284971774 | 9.15899661  | 8.704039767 | 9.051136382 | 8.876940188 |
| 7.5596141   | 7.257625943 | 7.76032623  | 7.117355787 | 6.838875062 | 7.073291772 |
| 4.727844166 | 2.51828802  | 2.453859607 | 1           | 1           | 1           |
| 5.638959969 | 5.683962973 | 5.507318447 | 4.651288752 | 4.461371462 | 5.056252732 |
| 9.403994863 | 9.457494762 | 9.525317669 | 9.246056978 | 9.345739935 | 9.51508604  |
| 5.254163095 | 5.784988506 | 5.892395377 | 6.049795852 | 6.412779514 | 6.191277754 |
| 6.539078069 | 6.695099597 | 6.660292091 | 5.703574518 | 6.276053451 | 6.153365028 |
| 6.097951976 | 6.655623635 | 6.033160362 | 5.773020902 | 6.488998496 | 5.831967395 |
| 6.918782085 | 6.57327552  | 7.001199353 | 6.502420681 | 6.359633686 | 6.074413015 |
| 11.7925045  | 11.72659332 | 11.73202157 | 11.60759734 | 11.80744231 | 11.7679559  |
| 11.46769289 | 11.54587001 | 11.63317863 | 11.77007374 | 11.75823967 | 11.6010713  |

|             |             |             |             |             |             |
|-------------|-------------|-------------|-------------|-------------|-------------|
| 12.34504551 | 12.33033155 | 12.3744356  | 12.19798395 | 12.2658083  | 12.13495251 |
| 8.380739763 | 8.08933844  | 7.627040832 | 7.624339595 | 7.42190694  | 7.26325617  |
| 8.704974225 | 8.838802181 | 8.626089581 | 8.250801034 | 8.613998814 | 8.398603659 |
| 10.54053    | 10.50348388 | 10.61741074 | 10.67409385 | 10.70083579 | 10.63418456 |
| 10.51315171 | 10.24768493 | 10.06455539 | 9.514142058 | 9.91892742  | 9.936597161 |
| 3.999927798 | 3.911841602 | 4.277538014 | 3.618193167 | 3.029091357 | 4.178715345 |
| 3.772519063 | 2.735797961 | 1.902806559 | 1           | 1           | 1           |
| 7.296069994 | 7.292360947 | 7.451790029 | 7.055988027 | 7.104179293 | 7.324244875 |
| 10.69064312 | 10.62513792 | 10.65291192 | 10.75677305 | 10.71677296 | 10.76407375 |
| 11.38200114 | 11.37713351 | 11.44618239 | 11.51466838 | 11.43844328 | 11.52934148 |
| 8.524786085 | 8.457772767 | 8.019207663 | 8.330706054 | 8.353569567 | 8.591699121 |
| 7.101456712 | 7.667941813 | 7.408134727 | 7.90131084  | 7.845673852 | 7.743306648 |
| 9.085611536 | 9.033595352 | 8.905282076 | 8.815217109 | 9.004291253 | 8.911420975 |
| 9.944629712 | 9.93928482  | 9.874468954 | 9.676991493 | 9.81911258  | 9.75706817  |
| 10.86951142 | 11.07381236 | 11.05497463 | 11.17313406 | 11.14355123 | 11.21538282 |
| 11.78917946 | 11.91112209 | 11.88913161 | 12.09284484 | 11.89933808 | 11.8568913  |
| 12.60404599 | 12.70819141 | 12.68281692 | 12.71818153 | 12.8092093  | 12.77828584 |
| 10.10757063 | 10.21524196 | 10.12310693 | 10.26266606 | 10.26440579 | 10.26573096 |
| 8.444932803 | 8.156868887 | 8.500067731 | 7.862010013 | 7.776394435 | 8.087884767 |
| 7.207746394 | 7.029575919 | 7.12321663  | 6.591618726 | 6.464036922 | 6.509044524 |
| 5.066011601 | 5.546839624 | 5.479466135 | 6.183334418 | 6.092794286 | 5.597970034 |
| 8.700935485 | 8.812120274 | 9.125691903 | 9.012968389 | 9.250419195 | 9.044242207 |
| 10.3893697  | 10.40375928 | 10.47481046 | 10.08034361 | 10.22036731 | 10.2125687  |
| 9.854786045 | 9.482152104 | 9.086993102 | 9.094920827 | 8.942382123 | 8.761974324 |
| 6.66050932  | 5.735359855 | 5.362346647 | 5.963305922 | 5.544776471 | 5.385472394 |
| 10.54053    | 10.52646241 | 10.52079875 | 10.45123929 | 10.38898786 | 10.38094244 |
| 11.50001249 | 11.50850356 | 11.392587   | 11.53417683 | 11.62524001 | 11.61203205 |
| 8.802434218 | 8.664149515 | 8.510427012 | 8.235505562 | 8.109838281 | 8.208335571 |
| 6.34569435  | 6.051493279 | 6.107831707 | 5.408575174 | 5.544776471 | 5.449445606 |
| 9.554826266 | 9.72557538  | 9.906198165 | 10.01734577 | 10.05051173 | 9.885478257 |
| 10.03563318 | 10.09003456 | 10.00596922 | 10.14316632 | 10.17686366 | 10.09623768 |
| 2.736907833 | 2.51828802  | 1.520899766 | 1.715872115 | 1           | 1.559564046 |
| 8.231939155 | 8.152148722 | 8.641881072 | 8.690642369 | 8.680520271 | 8.602291371 |
| 9.520863716 | 9.506395095 | 9.509911423 | 9.326218006 | 9.290016794 | 9.172982677 |
| 9.319589863 | 9.362617325 | 9.295042865 | 9.050161848 | 8.951390605 | 9.11991076  |
| 9.852967249 | 9.792317984 | 9.686266248 | 9.396668327 | 9.56113736  | 9.747557015 |
| 6.047952674 | 6.186883866 | 5.300017035 | 5.451571397 | 5.340507563 | 6.033255325 |
| 8.802434218 | 9.010310772 | 8.762351284 | 8.851788617 | 9.136552417 | 8.752495566 |
| 11.66354976 | 11.74238158 | 11.82521627 | 11.71240821 | 11.60183062 | 11.5873633  |
| 8.560887566 | 8.757228803 | 8.697340667 | 8.906896595 | 8.960343185 | 8.808455875 |
| 6.445624013 | 4.607277728 | 4.719818172 | 4.687710463 | 4.356767986 | 4.322310646 |
| 10.067352   | 10.01792561 | 10.10954235 | 9.823309041 | 10.27341368 | 10.12345657 |
| 8.969544164 | 8.887893367 | 8.793790042 | 8.965549816 | 9.213453244 | 9.044242207 |
| 6.483735105 | 5.968011289 | 5.849518442 | 6.257900576 | 6.488998496 | 6.114429039 |
| 6.260447187 | 6.408892928 | 6.107831707 | 6.396380483 | 5.805443346 | 5.947240612 |
| 10.68758487 | 10.64122782 | 10.47392851 | 10.76691557 | 10.76610963 | 10.62295805 |
| 9.588007655 | 9.532055239 | 9.098483254 | 8.983972632 | 9.076061327 | 9.182425815 |

|             |             |             |             |             |             |
|-------------|-------------|-------------|-------------|-------------|-------------|
| 9.52315293  | 9.485908413 | 9.417524607 | 9.507789993 | 9.525388248 | 9.494384631 |
| 4.285328166 | 3.615275167 | 2.851638739 | 1.973584608 | 1.824050315 | 1.961732649 |
| 11.69078854 | 11.7130361  | 11.72610781 | 11.53073485 | 11.50036773 | 11.5667793  |
| 7.125762598 | 7.166943424 | 7.218967562 | 6.947525041 | 6.717395152 | 6.744011451 |
| 8.542949746 | 8.499249134 | 8.513863641 | 7.924387501 | 8.133777608 | 8.267208831 |
| 6.520865289 | 6.470857031 | 6.596894388 | 6.374204007 | 5.805443346 | 5.969229824 |
| 6.609713527 | 6.559081984 | 6.889227203 | 6.063719846 | 6.125000019 | 6.299381202 |
| 9.246658354 | 9.088979539 | 9.068416365 | 9.149800917 | 9.31116599  | 9.134579614 |
| 9.411428714 | 9.438236597 | 9.391606112 | 9.252150009 | 9.22464282  | 9.284608544 |
| 10.63245846 | 10.69738552 | 10.52931377 | 10.34692479 | 10.33837944 | 10.39014066 |
| 7.5596141   | 7.65465389  | 7.695222204 | 7.780042959 | 8.125841888 | 7.671356603 |
| 6.66050932  | 6.987799746 | 6.824278552 | 6.893976097 | 6.696115476 | 6.638185375 |
| 7.78999516  | 7.782327225 | 7.771854035 | 7.345351577 | 7.382485901 | 7.390928385 |
| 2.736907833 | 3.819597725 | 4.671400465 | 3.828534121 | 2.34524792  | 3.839901004 |
| 5.339771562 | 5.546839624 | 4.719818172 | 3.691767369 | 3.676399415 | 4.178715345 |
| 10.84043326 | 10.89042082 | 10.90534819 | 10.83750467 | 10.89192788 | 10.86355122 |
| 7.263578997 | 6.900433157 | 7.3008215   | 7.496720166 | 7.355593773 | 7.462438096 |
| 3.502432386 | 5.225956494 | 4.569399469 | 3.27942815  | 3.278533864 | 3.260203441 |
| 13.49504383 | 13.47541559 | 13.44281726 | 13.38279054 | 13.4723033  | 13.45686045 |
| 7.495773425 | 7.842162587 | 8.004625024 | 7.99874804  | 7.89319835  | 8.031524424 |
| 8.630488399 | 8.553952214 | 8.730212132 | 8.403682368 | 8.470980627 | 8.577454052 |
| 9.019045162 | 8.856319854 | 8.489633528 | 8.310411101 | 8.653174768 | 8.315214295 |
| 1.662934613 | 1.950285237 | 2.453859607 | 1.973584608 | 1.824050315 | 1.961732649 |
| 10.98279234 | 11.4875787  | 10.28974047 | 9.958940652 | 10.28771032 | 10.22175706 |
| 9.819830621 | 10.02181202 | 10.1443267  | 10.05355606 | 10.13990926 | 10.08997929 |
| 10.20204145 | 10.07015463 | 10.29873362 | 10.23678214 | 10.52493863 | 10.37477755 |
| 10.63986118 | 10.69819527 | 10.62696347 | 10.38138325 | 10.63106719 | 10.53170332 |
| 10.17899734 | 10.08137078 | 10.20829798 | 9.036105741 | 9.91892742  | 9.83846692  |
| 11.06914353 | 11.03844028 | 11.00089651 | 10.58578382 | 10.85759887 | 10.83389729 |
| 13.10928568 | 13.07686094 | 13.14680554 | 12.88822707 | 13.06249137 | 13.12057755 |
| 8.292239643 | 8.234835352 | 8.475602818 | 8.350719467 | 8.723222769 | 8.742954118 |
| 10.0891474  | 9.99174513  | 10.05515133 | 9.392536946 | 10.03576439 | 9.905573617 |
| 8.248636274 | 8.044194949 | 8.10829131  | 7.512034842 | 7.966124173 | 8.102881187 |
| 3.999927798 | 3.501126557 | 3.911259693 | 5.092705987 | 4.966893338 | 4.322310646 |
| 5.014872929 | 5.034057356 | 4.980472725 | 5.822996311 | 5.636998506 | 5.924911051 |
| 9.295686681 | 9.028453381 | 8.878872845 | 8.699587777 | 8.863450061 | 8.626708321 |
| 10.22049749 | 10.15281519 | 10.20085481 | 10.34621291 | 10.43627764 | 10.22518767 |
| 10.45678534 | 10.44196834 | 10.60779434 | 10.12999179 | 10.37399086 | 10.34565454 |
| 10.69064312 | 10.89254488 | 10.76675173 | 10.94343855 | 10.97709762 | 10.95729748 |
| 8.875923097 | 8.885051431 | 8.524124682 | 8.786117501 | 8.733703782 | 8.755662077 |
| 10.39937356 | 10.29341445 | 10.3959897  | 9.840597836 | 10.06510985 | 9.965600906 |
| 10.24982116 | 10.06137027 | 10.16851328 | 10.23908479 | 10.3314955  | 10.31700365 |
| 7.751462309 | 7.558045101 | 7.451790029 | 7.33964048  | 7.182778534 | 7.390928385 |
| 7.968584936 | 8.274466839 | 8.251034929 | 8.322043152 | 8.240524304 | 8.161355003 |
| 8.059713194 | 8.08439169  | 8.038424687 | 8.185440959 | 8.247855159 | 8.442493064 |
| 9.509362842 | 9.511932248 | 9.318814306 | 8.918436479 | 9.386163822 | 9.317122067 |
| 9.079402573 | 9.218796206 | 9.082371295 | 8.130272067 | 8.738915872 | 8.844592102 |

|             |             |             |             |             |             |
|-------------|-------------|-------------|-------------|-------------|-------------|
| 11.2486358  | 11.27771144 | 11.0772127  | 11.25543759 | 11.37038667 | 11.2953477  |
| 9.829111844 | 9.97714075  | 10.09470202 | 10.21042533 | 10.04420989 | 10.24334771 |
| 9.282233988 | 9.392942223 | 9.555645215 | 9.48598135  | 9.264944382 | 9.312829034 |
| 10.68144884 | 10.65963678 | 10.63250682 | 10.80782184 | 10.80141291 | 10.77893404 |
| 8.96281382  | 8.818092378 | 9.003892878 | 9.000354392 | 9.096508139 | 8.953394427 |
| 11.242397   | 11.20323022 | 11.18137514 | 11.27726217 | 11.34241013 | 11.31855124 |
| 8.270602683 | 8.296022822 | 8.342779539 | 8.030999352 | 8.172814352 | 8.132414325 |
| 9.376404926 | 9.526594928 | 9.306977546 | 9.505241316 | 9.727691543 | 9.524398463 |
| 2.115432786 | 2.51828802  | 1.902806559 | 1.40189026  | 1           | 1.559564046 |
| 9.43106706  | 9.541110083 | 9.970140895 | 9.879494567 | 9.81911258  | 9.932405757 |
| 10.42530837 | 10.4602227  | 10.43639111 | 10.35544    | 10.45698353 | 10.4597482  |
| 10.05948743 | 10.20045832 | 10.23769249 | 9.958009047 | 10.11607231 | 10.19983838 |
| 7.125762598 | 7.129011846 | 7.095960814 | 6.53277027  | 6.932836069 | 7.123178845 |
| 2.459379109 | 1           | 2.453859607 | 1.715872115 | 2.727313987 | 1           |
| 8.907809947 | 9.007700245 | 9.147980247 | 8.869732495 | 9.017218788 | 8.841615082 |
| 10.22190745 | 10.31257763 | 10.36111752 | 10.21822745 | 10.13793782 | 10.36236818 |
| 7.671164481 | 8.059400275 | 8.117356351 | 7.837905142 | 7.557879992 | 8.010471298 |
| 5.768104837 | 6.327496784 | 6.756267574 | 6.460935129 | 6.607711868 | 6.228219627 |
| 9.21585516  | 8.890729715 | 9.25453211  | 9.32332716  | 9.29356326  | 9.219592145 |
| 8.197953754 | 8.399220977 | 8.121867602 | 8.403682368 | 8.795039474 | 8.357511393 |
| 7.369152291 | 7.231014618 | 7.324498692 | 7.232774998 | 7.167397529 | 7.315688472 |
| 8.145425703 | 7.921970025 | 7.944774196 | 7.800975433 | 7.557879992 | 7.382759567 |
| 8.609096644 | 8.850504231 | 8.868172288 | 9.025473053 | 9.084274859 | 8.958899742 |
| 9.486082338 | 9.461315737 | 9.555645215 | 9.583437621 | 9.814182797 | 9.66070144  |
| 9.041576948 | 9.327460451 | 9.221284012 | 9.128430017 | 9.257700068 | 9.141858487 |
| 6.862039628 | 7.203903194 | 6.889227203 | 6.69364274  | 6.304454951 | 6.228219627 |
| 9.727554556 | 9.637133751 | 9.642980588 | 9.896126787 | 9.826475814 | 9.814374024 |
| 8.344953553 | 8.553952214 | 8.724290942 | 8.710692098 | 8.664175246 | 8.619774115 |
| 5.380743228 | 4.431445628 | 5.057848307 | 5.318536384 | 5.723677922 | 5.136177653 |
| 6.787821537 | 6.81939105  | 6.744614044 | 6.947525041 | 7.120245449 | 7.382759567 |
| 1           | 9.487782907 | 9.023313611 | 1           | 1           | 9.253586914 |
| 8.209371407 | 8.28312792  | 8.139772847 | 8.367655585 | 8.749283901 | 8.533854956 |
| 9.755083448 | 9.60813029  | 9.810235301 | 9.69387699  | 9.8769923   | 9.712136288 |
| 8.350120538 | 8.300295637 | 8.392165755 | 8.175857308 | 8.001249753 | 7.730488902 |
| 9.012542342 | 9.304246677 | 8.996542169 | 8.815217109 | 8.872963477 | 8.93953852  |
| 8.385780378 | 8.300295637 | 8.217705199 | 8.61936812  | 8.452063741 | 8.507800089 |
| 9.548097416 | 9.613291101 | 9.543926806 | 9.770163671 | 9.784245015 | 9.710505406 |
| 9.525438517 | 9.284971774 | 9.242153692 | 8.433479258 | 8.933317037 | 9.08004861  |
| 8.459349571 | 9.147068325 | 9.082371295 | 9.274772397 | 9.152264008 | 8.928357175 |
| 10.01137787 | 10.01012123 | 9.990018182 | 10.2588886  | 10.10198334 | 10.14776314 |
| 8.824876588 | 8.806123345 | 8.966758984 | 8.728283129 | 8.452063741 | 8.293591443 |
| 11.87816007 | 11.89426119 | 11.87383424 | 11.94411783 | 11.75180852 | 11.8051078  |
| 6.282235843 | 5.29609709  | 4.621301235 | 5.008825805 | 5.394349575 | 5.318530269 |
| 7.856862399 | 8.234835352 | 7.87165773  | 8.030999352 | 8.419973731 | 8.595238519 |
| 2.736907833 | 2.51828802  | 2.204484772 | 1           | 1.824050315 | 1           |
| 8.209371407 | 8.300295637 | 8.02403597  | 7.82160853  | 7.796530343 | 7.811838214 |
| 8.684666505 | 8.781883201 | 8.721321208 | 9.012968389 | 8.95587384  | 8.874029242 |

|             |             |             |             |             |             |
|-------------|-------------|-------------|-------------|-------------|-------------|
| 9.035175123 | 8.918790663 | 8.881535629 | 8.600388542 | 8.685927719 | 8.637047535 |
| 8.313556889 | 8.495527444 | 8.715363338 | 8.336452558 | 8.647642915 | 8.336517847 |
| 7.906808767 | 7.812555509 | 7.719237693 | 7.647638464 | 7.816389075 | 8.170874306 |
| 5.533899618 | 6.010356039 | 5.759741239 | 5.963305922 | 6.156502484 | 5.653347452 |
| 2.969564903 | 4.080322903 | 3.163111837 | 3.180662487 | 2.34524792  | 3.520607779 |
| 8.313556889 | 8.539566335 | 8.593978392 | 8.238577657 | 7.855304819 | 8.271639574 |
| 2.115432786 | 1.950285237 | 2.851638739 | 3.27942815  | 2.727313987 | 3.109951065 |
| 7.913804874 | 7.824471101 | 7.855495907 | 8.280913921 | 8.28396087  | 8.280460444 |
| 8.911309814 | 8.844665071 | 8.913111487 | 9.065812981 | 9.205945018 | 9.168237827 |
| 8.415659735 | 8.741603072 | 8.648149585 | 8.65429554  | 8.942382123 | 8.900018702 |
| 9.654255362 | 9.658925994 | 9.441181853 | 9.674725087 | 9.898112222 | 9.690789652 |
| 6.725569324 | 6.392976945 | 7.058799756 | 6.305552825 | 5.956261216 | 6.114429039 |
| 8.06600729  | 7.627705145 | 7.860903323 | 7.481241175 | 7.314291673 | 7.39905121  |
| 9.293006159 | 9.660588765 | 9.426669514 | 9.662195809 | 9.504118052 | 9.426467822 |
| 9.631094747 | 9.542914252 | 9.616052022 | 9.431986552 | 9.187001701 | 9.463733101 |
| 5.886632987 | 6.223342662 | 6.311126551 | 6.720259364 | 6.717395152 | 6.582211399 |
| 10.39812687 | 10.42934409 | 10.38289375 | 10.28735224 | 10.28593097 | 10.30948182 |
| 8.67234323  | 9.015517697 | 8.672954772 | 8.697356619 | 8.269626834 | 8.332282228 |
| 5.969546468 | 5.809176966 | 5.534643218 | 5.721252018 | 5.991624824 | 5.597970034 |
| 4.727844166 | 4.157717108 | 2.851638739 | 3.27942815  | 2.34524792  | 2.275883944 |
| 4.790000379 | 4.949529988 | 5.019679186 | 5.295120421 | 5.991624824 | 5.831967395 |
| 6.817968469 | 7.050018949 | 6.801962577 | 6.909479681 | 7.151850774 | 6.447716088 |
| 12.16508624 | 12.20347396 | 12.24755716 | 12.27462449 | 12.25629838 | 12.30020528 |
| 10.35122497 | 10.35324472 | 10.38852086 | 10.47227103 | 10.61272995 | 10.47327559 |
| 7.594864927 | 7.732605344 | 7.52854736  | 7.652253424 | 7.660324057 | 7.9342675   |
| 8.008346747 | 8.039090684 | 7.74285995  | 8.005977562 | 8.027043853 | 8.212950568 |
| 8.538430225 | 8.415068601 | 8.547787053 | 8.692883926 | 8.901133016 | 8.93953852  |
| 4.594870902 | 4.859740248 | 4.766663576 | 5.341578351 | 4.650252065 | 3.520607779 |
| 8.752577268 | 8.867881238 | 8.870854877 | 8.612280006 | 8.353569567 | 8.544878875 |
| 9.572617927 | 9.392942223 | 9.485614278 | 9.007575889 | 9.246764932 | 9.41449701  |
| 9.097949868 | 8.970648033 | 8.857391771 | 8.49386144  | 8.38715367  | 8.657506294 |
| 10.09838843 | 9.913019228 | 9.894381335 | 9.806845766 | 9.8555586   | 9.985966586 |
| 8.696885408 | 8.800101385 | 8.610123325 | 8.32493657  | 8.520245571 | 8.374089013 |
| 11.58080418 | 11.52045657 | 11.51296339 | 11.6606681  | 11.75823967 | 11.63757396 |
| 7.687585568 | 7.477322183 | 7.555476699 | 7.257216343 | 6.386451309 | 7.032101622 |
| 10.53486888 | 10.53192322 | 10.51737862 | 10.64080973 | 10.85159662 | 10.81656615 |
| 8.850625601 | 8.97332641  | 8.657501581 | 8.994914447 | 9.279324784 | 8.874029242 |
| 8.843315515 | 8.932619082 | 8.959216116 | 8.912678075 | 8.915014174 | 9.20112866  |
| 10.35893502 | 10.44968255 | 10.34191075 | 10.53982668 | 10.60704051 | 10.629877   |
| 10.66702913 | 10.51639692 | 10.66609936 | 10.68257828 | 10.71545156 | 10.76564522 |
| 11.34753892 | 11.27337111 | 11.28456925 | 11.54383302 | 11.63015719 | 11.59489672 |
| 6.047952674 | 6.13040766  | 6.161403507 | 6.450374626 | 6.513535519 | 6.333687577 |
| 8.809953865 | 8.924337946 | 9.028128218 | 9.262751283 | 9.246764932 | 9.180070819 |
| 8.370605389 | 8.407166549 | 8.443525739 | 8.213815754 | 8.439313262 | 8.374089013 |
| 8.390803443 | 8.457772767 | 8.593978392 | 8.719514424 | 8.819845872 | 8.548534875 |
| 8.76036061  | 8.929863981 | 8.733163639 | 9.037870262 | 9.080173938 | 9.01282741  |
| 7.369152291 | 7.326279279 | 7.400728666 | 7.304890828 | 6.968771416 | 7.470169165 |

|             |             |             |             |             |             |
|-------------|-------------|-------------|-------------|-------------|-------------|
| 9.276817589 | 9.445970739 | 9.552306799 | 9.583437621 | 9.676999747 | 9.64371058  |
| 9.847497062 | 10.06639645 | 9.941078784 | 10.06138446 | 10.2680157  | 10.19167839 |
| 9.883579201 | 9.901815354 | 9.976382017 | 9.969148795 | 10.0588716  | 10.06594668 |
| 7.612172519 | 7.66131315  | 7.929415319 | 7.931998417 | 8.225749887 | 8.062539036 |
| 8.744751706 | 8.763432014 | 8.782436876 | 8.958114309 | 8.877696762 | 8.983416945 |
| 10.68860501 | 10.83111804 | 10.91057228 | 10.99974846 | 10.94363064 | 10.97777988 |
| 9.290320647 | 9.243414441 | 9.229668146 | 9.084714396 | 9.282897599 | 9.271395154 |
| 6.932625722 | 4.49246866  | 2.453859607 | 3.074635247 | 3.029091357 | 2.533710429 |
| 8.209371407 | 8.329856171 | 8.15305744  | 8.605156896 | 8.406935165 | 8.450331464 |
| 11.09245449 | 11.13429889 | 11.09854109 | 11.21740516 | 11.26594284 | 11.30023524 |
| 9.445622356 | 9.71120651  | 9.616052022 | 9.653014773 | 9.907400517 | 9.736380832 |
| 10.97612366 | 11.04672929 | 10.87760701 | 10.89266308 | 11.3191097  | 11.12522621 |
| 8.879501084 | 8.738457514 | 8.868172288 | 8.851788617 | 8.544261217 | 8.619774115 |
| 6.973377009 | 6.485940968 | 6.709077783 | 6.846439922 | 6.561392014 | 7.011056979 |
| 5.533899618 | 5.709890283 | 5.994323509 | 6.257900576 | 6.332308105 | 6.31663636  |
| 11.58519309 | 11.54046183 | 11.77203534 | 11.80157424 | 11.94289794 | 11.79744632 |
| 11.41627527 | 11.52548395 | 11.50348696 | 11.71378862 | 11.69528424 | 11.61856875 |
| 10.47463755 | 10.55087491 | 10.40063816 | 10.44127411 | 10.47739645 | 10.48762983 |
| 11.41935109 | 11.44044699 | 11.2910932  | 11.42615803 | 11.50496402 | 11.5041459  |
| 7.913804874 | 8.25698711  | 8.043189212 | 8.175857308 | 8.247855159 | 8.092900914 |
| 8.839646535 | 8.991937103 | 8.854684008 | 9.025473053 | 9.232054612 | 9.064811696 |
| 9.970023539 | 9.951561463 | 9.680161529 | 10.01734577 | 10.09387029 | 9.965600906 |
| 9.327470385 | 9.410835843 | 9.476836594 | 9.559069518 | 9.644041139 | 9.505713117 |
| 11.80901573 | 11.81957509 | 11.83039366 | 11.85809671 | 11.94346242 | 11.91150139 |
| 9.116261742 | 9.321166375 | 9.304995276 | 9.110096351 | 9.198397513 | 9.210389939 |
| 8.506390823 | 8.407166549 | 8.436299597 | 8.686148779 | 9.067800766 | 8.786950707 |
| 9.585819148 | 9.722394642 | 9.782009896 | 9.904855062 | 9.941708557 | 9.749146568 |
| 7.477002047 | 7.593295521 | 7.408134727 | 7.962046811 | 7.957207506 | 7.664634203 |
| 6.022287836 | 5.26145301  | 5.201162845 | 6.233470919 | 6.059853167 | 5.855770664 |
| 9.847497062 | 9.999649279 | 10.13431413 | 10.21198914 | 10.13200729 | 10.13079163 |
| 9.381460682 | 9.327460451 | 9.543926806 | 9.582228942 | 9.766490045 | 9.559247399 |
| 11.27604196 | 11.27445742 | 11.31984594 | 11.17794289 | 11.21635759 | 11.20441658 |
| 5.604782933 | 4.99241264  | 5.019679186 | 4.575565097 | 5.340507563 | 4.252298811 |
| 11.87860711 | 11.95683689 | 12.1307096  | 12.18649638 | 12.28731272 | 12.28549243 |
| 7.523480337 | 7.326279279 | 7.149967054 | 7.110664642 | 6.738365512 | 7.032101622 |
| 5.297602228 | 5.329928717 | 4.069091575 | 5.386586789 | 4.966893338 | 4.785889718 |
| 5.459352853 | 5.760387573 | 5.451065511 | 5.341578351 | 5.723677922 | 6.074413015 |
| 10.33307296 | 10.3051555  | 10.34577261 | 10.47813139 | 10.46486887 | 10.42834372 |
| 9.666733443 | 9.738228664 | 9.814421884 | 9.935468136 | 10.33666153 | 9.972421459 |
| 10.80981965 | 10.65963678 | 10.63645336 | 10.71767783 | 10.91973307 | 10.85398039 |
| 8.270602683 | 8.166263138 | 8.157458592 | 7.67056704  | 7.920979301 | 7.956453817 |
| 10.29740712 | 10.21637292 | 10.39226011 | 10.55099065 | 10.43788099 | 10.42635805 |
| 11.05180622 | 11.1083379  | 11.0455077  | 10.93966817 | 10.90241772 | 10.99261762 |
| 7.612172519 | 7.572248791 | 7.458939189 | 7.750217683 | 8.093655154 | 7.945403307 |
| 9.019045162 | 8.856319854 | 9.066077364 | 8.811095786 | 8.774882601 | 8.942320367 |
| 7.317331132 | 7.407742238 | 7.167529026 | 7.423020174 | 7.604310945 | 7.787292651 |
| 5.20937531  | 4.713619986 | 3.8253578   | 4.791763656 | 3.84055471  | 4.785889718 |

|             |             |             |             |             |             |
|-------------|-------------|-------------|-------------|-------------|-------------|
| 11.1184261  | 11.15980096 | 11.17541985 | 11.23750674 | 11.28744527 | 11.25340129 |
| 6.122316484 | 6.327496784 | 5.827592445 | 5.451571397 | 5.165761148 | 5.680258918 |
| 6.609713527 | 6.746108163 | 6.089523066 | 6.118109656 | 6.359633686 | 6.678785233 |
| 6.592376231 | 6.455613719 | 6.402951843 | 6.620166592 | 7.021049908 | 6.651846005 |
| 4.369159279 | 3.72105059  | 3.911259693 | 3.761770816 | 3.676399415 | 2.752371363 |
| 8.180656039 | 8.32567014  | 8.403326432 | 8.362032274 | 8.696682189 | 8.626708321 |
| 2.459379109 | 3.091832257 | 3.419133915 | 2.549633394 | 1.824050315 | 3.109951065 |
| 10.0891474  | 10.19817041 | 10.2167577  | 10.26115626 | 10.35034785 | 10.27348377 |
| 8.587382921 | 8.735305083 | 8.793790042 | 8.732647575 | 8.723222769 | 8.749322089 |
| 7.93459191  | 7.830392401 | 7.934553134 | 8.204419361 | 8.489652678 | 8.488897102 |
| 7.834915884 | 7.462147387 | 6.899773294 | 6.797283927 | 6.125000019 | 6.900967005 |
| 9.04476724  | 9.111037827 | 9.326651869 | 9.185261121 | 9.167806335 | 9.129706549 |
| 9.137335911 | 9.274151165 | 9.107609938 | 8.769221771 | 8.819845872 | 8.905731103 |
| 10.70482988 | 10.68844809 | 10.8329065  | 10.86261213 | 11.14355123 | 11.06587622 |
| 8.900784637 | 8.946316211 | 9.156800057 | 9.043150913 | 9.596022008 | 9.406460927 |
| 8.492438798 | 8.654168773 | 8.721321208 | 8.295737896 | 8.060733912 | 8.369962432 |
| 11.2465592  | 11.30773354 | 11.37945999 | 11.36667635 | 11.40604543 | 11.43620465 |
| 9.27952833  | 9.252263386 | 9.107609938 | 9.207381195 | 9.092441894 | 9.08004861  |
| 10.13477173 | 10.22875524 | 10.28873777 | 10.34478811 | 10.37399086 | 10.34355166 |
| 7.594864927 | 7.317874162 | 7.422833761 | 7.865988625 | 7.692916917 | 7.762322238 |
| 10.08605386 | 10.1889823  | 9.962615734 | 10.27244141 | 10.22222934 | 10.28995795 |
| 7.34864665  | 7.283755284 | 7.068180142 | 7.491578933 | 7.649294063 | 7.446850551 |
| 8.034258568 | 7.81255509  | 7.639679523 | 8.120313546 | 8.291074833 | 8.25383437  |



| SPF + FLX v SPF + Veh p-value | ABX + FLX v SPF + FLX p-value | ABX + FLX v ABX + Veh p-value |
|-------------------------------|-------------------------------|-------------------------------|
| 0.392814015                   | 0.001884205                   | 0.076007067                   |
| 0.034683619                   | 0.535804407                   | 0.897614102                   |
| 0.010440991                   | 0.083457669                   | 0.872192048                   |
| 0.027705121                   | 0.488039803                   | 0.413783661                   |
| 0.034623626                   | 0.340596856                   | 0.287505874                   |
| 0.023225193                   | 0.072512433                   | 0.822311727                   |
| 0.253894014                   | 0.521069976                   | 0.003770737                   |
| 0.786434653                   | 0.030645572                   | 0.000907783                   |
| 0.02596836                    | 0.099685887                   | 0.6052294                     |
| 0.22646001                    | 0.036971446                   | 0.130676784                   |
| 0.046472897                   | 0.377633863                   | 0.423282134                   |
| 0.033996648                   | 0.250347824                   | 0.560318607                   |
| 0.131294501                   | 0.442267845                   | 0.001730664                   |
| 0.063577776                   | 0.01477023                    | 0.199742438                   |
| 0.04258494                    | 0.169380551                   | 0.811658475                   |
| 0.018348663                   | 0.481143506                   | 0.904573557                   |
| 0.031984998                   | 0.156494234                   | 0.587824226                   |
| 0.029835884                   | 0.083976705                   | 0.921259437                   |
| 0.049485824                   | 0.101516081                   | 0.292198977                   |
| 0.026806071                   | 0.074347978                   | 0.787306936                   |
| 0.003087075                   | 0.00855973                    | 0.042377024                   |
| 0.035784235                   | 0.122195139                   | 0.740654576                   |
| 0.103864017                   | 0.028830651                   | 0.40939607                    |
| 0.455707299                   | 0.007208238                   | 0.004764486                   |
| 0.10745715                    | 0.003568716                   | 0.493130289                   |
| 0.062865243                   | 0.631002286                   | 0.001772798                   |
| 0.023382853                   | 0.16709747                    | 0.07605021                    |
| 0.148313845                   | 0.026950567                   | 0.275888234                   |
| 0.141935187                   | 0.034933686                   | 0.849791692                   |
| 0.026860646                   | 0.136188458                   | 0.857300087                   |
| 0.044816552                   | 0.394492393                   | 0.475077068                   |
| 0.003604547                   | 0.041268613                   | 0.955610548                   |
| 0.031406284                   | 0.400558588                   | 0.290158944                   |
| 0.399470242                   | 0.299491548                   | 0.049333129                   |
| 0.206693658                   | 0.040529729 NA                |                               |
| 0.021820638                   | 0.197894883                   | 0.988147946                   |
| 0.018235755                   | 0.007391615                   | 0.437140021                   |
| 0.000339234                   | 0.000820049                   | 0.280818638                   |
| 0.028553745                   | 0.232816385                   | 0.777918606                   |
| 0.379804896                   | 0.019483595                   | 0.076672978                   |
| 0.242370642                   | 0.021739132                   | 0.178055972                   |
| 0.052114443                   | 0.492771392                   | 0.002133852                   |
| 0.023968924                   | 0.100351002                   | 0.540041314                   |
| 0.90350571                    | 0.297450439                   | 0.03920808                    |
| 0.160946062                   | 0.034177786                   | 0.721696757                   |

|             |             |             |
|-------------|-------------|-------------|
| 0.161669641 | 0.007856882 | 0.069011002 |
| 0.043334254 | 0.690567813 | 0.701278142 |
| 0.009820014 | 0.19748294  | 0.646743423 |
| 0.032925859 | 0.094913226 | 0.316140859 |
| 0.8370598   | 0.18193683  | 0.011188293 |
| 0.99523098  | 0.016875924 | 0.167668924 |
| 0.030648978 | 0.185562842 | 0.91374623  |
| 0.691315855 | 0.046669362 | 0.102192092 |
| 0.254390232 | 0.102708074 | 0.013155432 |
| 0.156896581 | 0.876177793 | 0.00234572  |
| 0.097723468 | 0.003899992 | 0.020991658 |
| 0.319313565 | 0.013522776 | 0.00016139  |
| 0.178683918 | 0.006458595 | 0.063933634 |
| 0.009311841 | 0.697896713 | 0.72748346  |
| 0.764531466 | 0.906569391 | 0.039150964 |
| 0.339832457 | 0.030388639 | 0.129269172 |
| 0.750153031 | 0.246311212 | 0.03915143  |
| 0.712896381 | 0.033858075 | 0.004125678 |
| 0.065891959 | 0.559026098 | 0.018714777 |
| 0.522048985 | 0.459152716 | 0.019306601 |
| 0.309296194 | 0.049029605 | 0.528589903 |
| 0.077054474 | 0.011812694 | 0.093372574 |
| 0.548629898 | 0.024373493 | 0.050929733 |
| 0.049026022 | 0.027150213 | 0.044430082 |
| 0.612475789 | 0.663520153 | 0.000107327 |
| 0.747666354 | 0.041047346 | 0.014201706 |
| 0.039729735 | 0.634818225 | 0.45342955  |
| 0.461148373 | 0.040748008 | 0.025275485 |
| 0.541149406 | 0.651006485 | 0.017190779 |
| 0.925702827 | 0.359320905 | 0.019398956 |
| 0.678076414 | 0.248898534 | 0.03162551  |
| 0.962391745 | 0.232302044 | 0.048939171 |
| 0.022356169 | 0.133707871 | 0.810221909 |
| 0.945548505 | 0.192465724 | 0.004927365 |
| 0.444536693 | 0.055016066 | 0.002695422 |
| 0.209891673 | 0.007335922 | 0.08229879  |
| 0.840480269 | 0.760762918 | 0.015565975 |
| 0.012224391 | 0.002601432 | 0.186463533 |
| 0.922624759 | 0.793818592 | 0.008306786 |
| 0.230829728 | 0.930278779 | 0.035152096 |
| 0.709498805 | 0.750382329 | 0.047243846 |
| 0.3663837   | 0.668688595 | 0.000399782 |
| 0.732294072 | 0.099827056 | 0.007925319 |
| 0.197184985 | 0.019216142 | 0.004178642 |
| 0.849792062 | 0.883484774 | 0.015301553 |
| 0.018299463 | 0.142893794 | 0.039391335 |
| 0.915908889 | 0.009304154 | 0.093222527 |

|             |             |             |
|-------------|-------------|-------------|
| 0.391584237 | 0.001774093 | 6.88E-05    |
| 0.034385575 | 0.141831763 | 0.310744899 |
| 0.946898967 | 0.252956605 | 0.04098168  |
| 0.000249482 | 5.55E-09    | 0.019603859 |
| 0.587555672 | 0.243012752 | 0.021164573 |
| 0.035993532 | 0.095374271 | 0.410859086 |
| 0.809882827 | 0.755257767 | 0.008369729 |
| 0.099171747 | 0.047319343 | 0.219935298 |
| 0.62402993  | 0.097079741 | 0.010650139 |
| 0.340787177 | 0.931177515 | 0.007256965 |
| 0.007450033 | 0.889399435 | 0.25156691  |
| 0.038715479 | 0.017418095 | 0.07344627  |
| 0.031724093 | 0.223666153 | 0.509090829 |
| 0.018254466 | 0.991593291 | 0.121662152 |
| 0.036983469 | 0.291668029 | 0.882595281 |
| 0.035496677 | 0.639472084 | 0.099083981 |
| 0.013144257 | 0.073719129 | 0.417891301 |
| 0.316199357 | 0.436669353 | 0.019154065 |
| 0.871379318 | 0.539279003 | 0.015858317 |
| 0.027596461 | 0.071951698 | 0.396706075 |
| 0.129678962 | 0.479764162 | 0.043144812 |
| 0.058441461 | 0.02634755  | 0.579235252 |
| 0.032908748 | 0.021890258 | 0.697044592 |
| 0.038107452 | 0.684511921 | 0.004316389 |
| 0.003338399 | 0.000291939 | 0.455134441 |
| 0.004286474 | 0.477764608 | 0.509009298 |
| 0.451916943 | 0.149365895 | 0.044833935 |
| 0.12224853  | 0.622801306 | 1.28E-05    |
| 0.00388342  | 0.009851766 | 0.828130332 |
| 0.048900257 | 0.794966514 | 0.736663701 |
| 0.030283254 | 0.298443383 | 0.719073097 |
| 0.744399486 | 0.414880599 | 0.034185536 |
| 0.081286929 | 0.002459219 | 0.025352465 |
| 0.565603739 | 0.364914871 | 0.018477645 |
| 0.483876779 | 0.048358594 | 0.789976181 |
| 0.24315236  | 0.812219454 | 0.014213481 |
| 0.390115599 | 0.339657943 | 0.04151657  |
| 0.033167398 | 0.92147769  | 0.324705503 |
| 0.024033549 | 0.394429421 | 0.052081986 |
| 0.541767455 | 0.014839674 | 0.013537731 |
| 0.048868969 | 0.806014355 | 0.132820573 |
| 0.12777817  | 0.959866593 | 0.003713162 |
| 0.603240044 | 0.034769174 | 0.08922197  |
| 0.25921748  | 0.007073109 | 0.110034002 |
| 0.136044398 | 0.028285798 | 0.044274529 |
| 0.269516415 | 0.568377336 | 0.022719385 |
| 0.957165696 | 0.97851351  | 0.033016968 |

|             |             |             |
|-------------|-------------|-------------|
| 0.1063313   | 0.030346601 | 0.328682214 |
| 0.041856107 | 0.843267803 | 0.154899589 |
| 0.01939925  | 0.041114232 | 0.322907515 |
| 0.469194558 | 0.018079183 | 0.162557918 |
| 0.881538409 | 0.015874302 | 0.404790733 |
| 0.001332    | 0.017143045 | 0.661134138 |
| 0.033234762 | 0.789914037 | 0.010266585 |
| 0.683383559 | 0.244714937 | 0.024256141 |
| 0.02143578  | 0.021509267 | 0.994233083 |
| 0.013380224 | 0.000529784 | 0.029317938 |
| 0.005862394 | 0.174835323 | 0.115870683 |
| 0.013021942 | 0.487128361 | 0.112150545 |
| 0.009650107 | 0.059497325 | 0.630563396 |
| 0.82214536  | 0.452015548 | 0.039451733 |
| 0.040192114 | 0.171010177 | 0.676492085 |
| 0.031887584 | 0.103742345 | 0.367067059 |
| 0.659900194 | 0.094418026 | 0.007420623 |
| 0.583822106 | 0.064011939 | 0.021182661 |
| 0.756667876 | 0.002882129 | 6.54E-07    |
| 0.025816592 | 0.42247619  | 0.321802135 |
| 0.656776373 | 0.445603025 | 0.000193086 |
| 0.012161149 | 0.255523494 | 0.91481824  |
| 0.039476904 | 0.570512584 | 0.001394851 |
| 0.800253403 | 0.219563274 | 0.048382238 |
| 0.54753532  | 0.863341691 | 0.011133594 |
| 0.775415302 | 0.183135938 | 0.030177665 |
| 0.188475111 | 0.028114375 | 0.434485654 |
| 0.494916062 | 0.157937715 | 0.043654033 |
| 0.008049265 | 0.090549308 | 0.014476397 |
| 0.000543476 | 0.424923939 | 0.489390753 |
| 0.011937871 | 0.028683922 | 0.558164825 |
| 0.702887376 | 0.013453668 | 0.001389712 |
| 0.292195676 | 0.992456163 | 0.049011661 |
| 0.017683874 | 0.062435926 | 0.155858652 |
| 0.245363324 | 0.475182224 | 0.012973522 |
| 0.188873393 | 0.000378626 | 0.085320369 |
| 0.898884585 | 0.007152826 | 5.25E-05    |
| 0.3223205   | 0.029034443 | 0.2926645   |
| 0.144047664 | 0.01299754  | 0.120922822 |
| 0.699604598 | 0.421198222 | 0.013103406 |
| 0.329042401 | 0.059631178 | 0.041002201 |
| 0.024788044 | 0.006542667 | 0.489836255 |
| 0.140869431 | 0.104600991 | 0.016164681 |
| 0.461746397 | 0.724103809 | 0.039615452 |
| 0.305448932 | 0.731052374 | 0.005633628 |
| 0.402567183 | 0.019003803 | 0.65875334  |
| 0.041388864 | 0.405453495 | 0.807694308 |

|             |             |             |
|-------------|-------------|-------------|
| 0.141786783 | 0.008116022 | 0.021422313 |
| 0.009916439 | 0.044187767 | 0.695233794 |
| 0.881492482 | 0.133684316 | 0.003430939 |
| 0.510125875 | 0.202829389 | 0.041741224 |
| 0.678611998 | 0.445243085 | 0.024101996 |
| 0.311339106 | 0.398576654 | 0.001569754 |
| 0.259740241 | 0.042334647 | 0.092705218 |
| 0.655076617 | 0.064179976 | 0.042815842 |
| 0.123247374 | 0.012145668 | 0.259040027 |
| 0.243141378 | 0.021643601 | 0.033232191 |
| 0.264047262 | 0.786922784 | 0.026809279 |
| 0.535586101 | 0.135102613 | 0.017920926 |
| 0.028155246 | 0.98720156  | 0.58100332  |
| 0.809858166 | 0.156116981 | 0.013191853 |
| 0.023988198 | 0.151616294 | 0.214821642 |
| 0.006087109 | 0.003689743 | 0.230963955 |
| 0.039758974 | 0.272462339 | 0.116776853 |
| 0.257179797 | 0.017939056 | 0.049228773 |
| 0.033247682 | 0.664360902 | 0.679264463 |
| 0.352654303 | 0.020652385 | 0.131959359 |
| 0.919175832 | 0.184473546 | 0.022836098 |
| 0.056561306 | 5.84E-05    | 0.002465101 |
| 0.042874548 | 0.195273715 | 0.4257178   |
| 0.014553958 | 0.000489747 | 0.015674925 |
| 0.041507471 | 0.214476479 | 0.236812767 |
| 0.60123916  | 0.444302823 | 0.024729555 |
| 0.338398788 | 0.02353369  | 0.001932128 |
| 0.92728024  | 0.002370949 | 0.000668059 |
| 0.09851632  | 0.516965836 | 0.044207434 |
| 0.803201397 | 0.023652553 | 0.009163776 |
| 0.322502141 | 0.235597439 | 0.030967068 |
| 0.697449364 | 0.555438809 | 0.007986168 |
| 0.596691106 | 0.0410964   | 0.013729253 |
| 0.24343461  | 0.335283135 | 0.02108208  |
| 0.297054163 | 0.751855521 | 0.001141541 |
| 0.457832298 | 0.219486998 | 0.046242532 |
| 0.064208043 | 0.014792864 | 0.045849116 |
| 0.400657273 | 0.004809727 | 0.042047282 |
| 0.036145782 | 0.163728478 | 0.868118927 |
| 0.181901537 | 0.225490326 | 0.002437243 |
| 0.613747217 | 0.030514924 | 0.000751383 |
| 0.474356055 | 0.739548255 | 0.027414005 |
| 0.184779529 | 0.251981606 | 0.037033841 |
| 0.825812997 | 0.019483376 | 0.01300121  |
| 0.194329371 | 0.041197223 | 0.845950245 |
| 0.737518478 | 0.017195124 | 0.019908224 |
| 0.554425844 | 0.038870475 | 0.130680193 |

|             |             |             |
|-------------|-------------|-------------|
| 0.020156801 | 0.392602892 | 0.274658701 |
| 0.039309056 | 0.069338913 | 0.311261606 |
| 0.176085413 | 0.00020623  | 0.004796374 |
| 0.002652023 | 0.972231403 | 0.001402666 |
| 0.988452701 | 0.060112784 | 0.025156488 |
| 0.148200839 | 0.582705643 | 0.043311903 |
| 0.470861294 | 0.010229416 | 0.429740536 |
| 0.175411185 | 0.005809521 | 0.077113005 |
| 0.22274796  | 0.952975383 | 0.003458786 |
| 0.037423864 | 0.574733526 | 0.086966559 |
| 0.3280725   | 0.041557268 | 0.979407132 |
| 0.30441308  | 0.027939449 | 0.213671663 |
| 0.904055768 | 0.913037074 | 0.039340056 |
| 0.273499263 | 0.325105845 | 7.03E-05    |
| 0.017688575 | 0.001166535 | 0.110793271 |
| 0.075241364 | 0.003655151 | 0.971697925 |
| 0.775788441 | 0.123415674 | 0.017199268 |
| 0.291562035 | 0.037005982 | 0.247015913 |
| 0.185407085 | 0.886411541 | 0.022083055 |
| 0.017009256 | 0.016879126 | 0.389780128 |
| 0.983079168 | 0.093810066 | 0.012215965 |
| 0.694796048 | 0.033795759 | 0.043278871 |
| 0.025498492 | 0.349060593 | 0.380926547 |
| 0.492353571 | 0.837735944 | 0.025287653 |
| 0.071023197 | 0.139481402 | 0.002937711 |
| 0.162796478 | 0.058206439 | 0.015217942 |
| 0.325019432 | 0.013513967 | 0.048275168 |
| 0.796477545 | 0.229650438 | 0.027214466 |
| 0.348659591 | 0.033496462 | 0.02021582  |
| 0.427513257 | 0.035856967 | 0.371789718 |
| 0.883645252 | 0.048413936 | 0.055058914 |
| 0.020794723 | 0.72599666  | 0.889720693 |
| 0.682173165 | 0.732728275 | 0.01247601  |
| 0.987323425 | 0.043078773 | 0.097993602 |
| 0.021946998 | 0.46916496  | 0.065062306 |
| 0.042574906 | 0.305891815 | 0.312564435 |
| 0.517111633 | 0.021755098 | 0.27257449  |
| 0.197514395 | 0.786619206 | 1.65E-05    |
| 0.326802668 | 0.628529384 | 0.002162801 |
| 0.25065915  | 0.032428735 | 0.202472707 |
| 0.411785123 | 0.525721961 | 0.013652553 |
| 0.582956772 | 0.143372511 | 0.004518097 |
| 0.909258111 | 0.055045678 | 0.00515185  |
| 0.647063242 | 0.027011912 | 0.097646273 |
| 0.129065637 | 0.037290841 | 0.231381114 |
| 0.92270548  | 0.005473299 | 0.03812194  |
| 0.031587036 | 0.115923488 | 0.043653202 |

|             |             |             |
|-------------|-------------|-------------|
| 0.627915165 | 0.009963532 | 0.016427019 |
| 0.012292701 | 0.15482533  | 0.449305997 |
| 0.223081435 | 0.292092955 | 0.036089797 |
| 0.200619721 | 0.821452547 | 0.001270093 |
| 0.447928175 | 0.238583183 | 0.014864282 |
| 0.548418    | 0.116280884 | 0.03258933  |
| 0.227083907 | 0.850835628 | 0.004679733 |
| 0.113835899 | 0.027839768 | 0.146634211 |
| 0.80407767  | 0.044995411 | 0.129687257 |
| 0.394944916 | 0.157074585 | 0.002296112 |
| 0.069225265 | 0.000105091 | 0.026002874 |
| 0.373817747 | 6.47E-05    | 0.002129245 |
| 0.920710439 | 0.04700455  | 0.044901002 |
| 0.708103746 | 0.105917999 | 0.000433701 |
| 0.21778877  | 0.036571132 | 0.301340803 |
| 0.015159432 | 0.084484119 | 0.325112402 |
| 0.014117257 | 0.686460485 | 0.608484494 |
| 0.5555785   | 0.026474007 | 0.695975034 |
| 0.685345144 | 0.085509379 | 0.006776795 |
| 0.404260107 | 0.012464642 | 0.237933754 |
| 0.777596334 | 0.17123186  | 0.024609148 |
| 0.152051727 | 0.00194998  | 0.154144791 |
| 0.012948694 | 0.055673694 | 0.273813724 |
| 0.116654762 | 0.004802311 | 0.019835678 |
| 0.041754536 | 0.514113683 | 0.65768474  |
| 0.024416384 | 0.0257871   | 0.158388918 |
| 0.004181867 | 0.059397101 | 0.027701225 |
| 0.345264704 | 0.143804072 | 9.07E-05    |
| 0.730570758 | 0.515481343 | 0.010800517 |
| 0.010830997 | 0.020528494 | 0.043375343 |
| 0.235074479 | 0.730263905 | 0.004795556 |
| 0.074361195 | 0.004264935 | 0.049379825 |
| 0.749850874 | 0.1895535   | 0.00124344  |
| 0.008988005 | 0.002382137 | 0.336444196 |
| 0.052048357 | 1.45E-05    | 0.00335537  |
| 0.001275975 | 0.000542794 | 0.215864086 |
| 0.029647954 | 0.000653353 | 0.223240453 |
| 0.491740727 | 0.012743534 | 0.026354594 |
| 0.023895361 | 0.14361953  | 0.116212414 |
| 0.012766871 | 0.007079106 | 0.746529257 |
| 0.000704997 | 2.78E-05    | 0.738382864 |
| 0.716906225 | 0.005428508 | 0.014979074 |
| 0.220905259 | 0.008155923 | 0.092744908 |
| 0.483966392 | 0.149596052 | 0.028244127 |
| 0.224331485 | 0.042218184 | 0.09889667  |
| 0.573405056 | 0.029127675 | 0.565518032 |
| 0.00024761  | 0.00564659  | 0.198540223 |

|             |             |             |
|-------------|-------------|-------------|
| 0.007670802 | 0.004146641 | 0.271027171 |
| 0.020880952 | 0.187273063 | 0.203237269 |
| 0.017067662 | 0.000317241 | 0.196202196 |
| 0.967683485 | 0.111133573 | 0.031738803 |
| 0.628541595 | 0.002169888 | 0.004151486 |
| 0.018448699 | 0.048773383 | 0.534682905 |
| 0.037260539 | 0.380510377 | 0.024056603 |
| 0.813488175 | 0.031467846 | 0.0061355   |
| 0.817211604 | 0.262770391 | 0.026335909 |
| 0.306247531 | 0.460163444 | 0.037788581 |
| 0.09467623  | 0.023697261 | 0.432557639 |
| 0.988624783 | 0.584119021 | 0.043979041 |
| 0.433938047 | 0.045648227 | 0.004547442 |
| 0.585558546 | 0.054130571 | 0.035137353 |
| 0.018926154 | 0.000976869 | 0.105115729 |
| 0.174161421 | 0.0194532   | 0.443308543 |
| 0.000210941 | 0.075420597 | 0.147819309 |
| 0.150948068 | 0.005191291 | 0.015918255 |
| 0.022872985 | 0.034159148 | 0.764669308 |
| 0.535194169 | 0.02986803  | 0.257483175 |
| 0.122986196 | 0.003077361 | 0.06071945  |
| 0.551196775 | 0.075303735 | 0.00959204  |
| 0.229424947 | 0.05911613  | 0.037048891 |
| 0.785597279 | 0.02021099  | 2.69E-05    |
| 0.991310808 | 0.358522147 | 0.020559339 |
| 0.878932344 | 0.119757776 | 0.021523345 |
| 0.162315472 | 0.808404108 | 0.032208077 |
| 0.004456462 | 0.02491519  | 0.630487233 |
| 0.69861837  | 0.046060325 | 0.174766    |
| 0.25257913  | 0.009800316 | 0.055663435 |
| 0.442547559 | 0.007987427 | 0.025528545 |
| 0.009085024 | 0.014372974 | 0.787426676 |
| 0.245737436 | 0.547378369 | 0.045443931 |
| 0.111544803 | 0.036033115 | 0.1256257   |
| 0.709060898 | 0.024457813 | 0.015491963 |
| 0.039067418 | 0.142979239 | 0.762364986 |
| 0.099494724 | 0.002628569 | 0.002807826 |
| 0.842810392 | 0.020601628 | 0.006471988 |
| 0.491397582 | 0.093988255 | 0.025676816 |
| 0.767106777 | 0.171196288 | 0.008272977 |
| 0.134949119 | 0.038109289 | 0.255222521 |
| 0.591942462 | 0.039784979 | 0.768589788 |
| 0.597406921 | 0.217966631 | 0.008723175 |
| 0.454309726 | 0.031550376 | 0.341700262 |
| 0.566341817 | 0.770401284 | 0.017591692 |
| 0.031463071 | 0.61452113  | 0.32188988  |
| 0.417648829 | 0.004940912 | 0.110739739 |



|             |             |             |
|-------------|-------------|-------------|
| 0.041513026 | 0.000157117 | 0.005208588 |
| 0.288702109 | 0.0008071   | 0.024034857 |
| 0.775582561 | 5.98E-05    | 0.00656854  |
| 0.025732839 | 0.95553281  | 0.158001519 |
| 0.438487629 | 0.001825092 | 0.012069512 |
| 0.758422285 | 0.254020791 | 0.049051079 |
| 0.029754193 | 0.018840602 | 0.450239327 |
| 0.014632141 | 0.654636671 | 0.348534644 |
| 0.309274945 | 0.666492274 | 0.029376832 |
| 0.665345969 | 0.701006085 | 0.021102224 |
| 0.618603793 | 0.387285097 | 0.014202391 |
| 0.069027577 | 0.00091834  | 0.007832035 |
| 0.049555812 | 0.84428531  | 0.753510809 |
| 0.021982173 | 0.010329487 | 0.339013618 |
| 0.514324438 | 0.225786022 | 0.007276049 |
| 0.043179842 | 0.195572211 | 0.281969075 |
| 0.034065479 | 0.048270469 | 4.19E-06    |
| 0.241065667 | 0.896622802 | 0.021337213 |
| 0.114365996 | 0.016621855 | 0.31642746  |
| 0.690600909 | 0.134320827 | 0.00771732  |
| 0.143410592 | 0.003855709 | 0.036992297 |
| 0.010033275 | 0.011796074 | 0.414458339 |
| 0.021179374 | 0.144329752 | 0.030303071 |
| 0.106283806 | 0.011399622 | 0.286055179 |
| 0.428699014 | 0.014839041 | 0.329575169 |
| 0.852658288 | 0.812651474 | 0.023257501 |
| 0.092734283 | 0.990625317 | 0.019863213 |
| 0.064062656 | 0.01300125  | 0.637029377 |
| 0.483577477 | 0.370996494 | 0.012809482 |
| 0.019171078 | 0.018012719 | 0.6649065   |
| 0.039053109 | 0.074398515 | 0.224593358 |
| 0.547916882 | 0.127998234 | 0.001792733 |
| 0.273389391 | 0.60775182  | 0.026814841 |
| 0.021509993 | 0.163397284 | 0.589422893 |
| 0.013736001 | 0.010347119 | 0.855124423 |
| 0.015277397 | 0.48382772  | 0.275010115 |
| 0.031807549 | 0.669783835 | 0.451582182 |
| 0.120565671 | 0.014136127 | 0.968910017 |
| 0.026560352 | 0.086985649 | 0.606630097 |
| 0.074547355 | 0.01041593  | 0.167141136 |
| 0.297371616 | 0.005258364 | 0.456768168 |
| 0.202094337 | 0.02725577  | 0.666349834 |
| 0.357675465 | 0.246304567 | 0.022012335 |
| 0.410429673 | 0.002259077 | 0.181122687 |
| 0.226185873 | 0.052605516 | 0.036250074 |
| 0.102208667 | 0.002453282 | 0.059805764 |
| 0.085860104 | 0.62742693  | 0.013478211 |

|             |             |             |
|-------------|-------------|-------------|
| 0.188957985 | 0.039029231 | 0.249344047 |
| 0.040183052 | 0.090545572 | 0.486149219 |
| 0.392852558 | 0.349669837 | 0.043473838 |
| 0.009554971 | 0.819349195 | 0.927004399 |
| 0.765781909 | 0.018075677 | 0.454036162 |
| 0.00910397  | 0.499895895 | 1.91E-05    |
| 0.035578514 | 0.571613794 | 0.000974593 |
| 0.11730198  | 0.878110341 | 0.023394703 |
| 0.165846625 | 0.538851584 | 0.033946018 |
| 0.011810462 | 0.127374303 | 0.214278247 |
| 0.099920851 | 0.000296224 | 0.000805091 |
| 0.017779314 | 3.54E-06    | 3.34E-06    |
| 0.147520524 | 0.033715212 | 0.42969145  |
| 0.498141904 | 0.00608188  | 0.316206305 |
| 0.142484206 | 0.087495052 | 0.041645423 |
| 0.957583811 | 0.020836755 | 0.000616291 |
| 0.348488965 | 0.934351686 | 0.012037979 |
| 0.3007747   | 0.014049138 | 0.142242424 |
| 0.035431272 | 0.213751266 | 0.950348661 |
| 0.136592709 | 0.04319388  | 0.079999071 |
| 0.225255769 | 0.023434777 | 0.077676181 |
| 0.721379245 | 0.172118955 | 0.017644032 |
| 0.416761839 | 0.749312572 | 0.035058904 |
| 0.180199776 | 0.01902585  | 0.775504174 |
| 0.011695732 | 0.377647673 | 0.782773222 |
| 0.02862237  | 0.033644524 | 0.780970976 |
| 0.157640782 | 0.016247769 | 0.336867746 |
| 0.040385923 | 0.472220248 | 0.898829734 |
| 0.1071181   | 0.013964988 | 0.080511633 |
| 0.6900058   | 0.115464819 | 0.019110497 |
| 0.132241353 | 0.068326601 | 0.001655163 |
| 0.690601579 | 0.193445386 | 0.002816241 |
| 0.363215441 | 0.02355259  | 0.004971404 |
| 0.771241196 | 0.146192376 | 0.010731977 |
| 0.003820741 | 0.003911045 | 0.388982614 |
| 0.149362679 | 0.836980325 | 0.04946393  |
| 0.37373419  | 0.000309449 | 0.000731116 |
| 0.442763378 | 0.033036201 | 0.018966826 |
| 0.880371646 | 0.059689787 | 0.010436149 |
| 0.000347068 | 0.00014133  | 0.707283768 |
| 0.934484823 | 0.243402587 | 0.011660925 |
| 0.074575059 | 0.010780692 | 0.172339016 |
| 0.069443003 | 0.616845545 | 0.047005686 |
| 0.198101338 | 0.035080137 | 0.430537883 |
| 0.286464319 | 0.255727301 | 0.003804681 |
| 0.036193729 | 0.071137773 | 0.608473117 |
| 0.626197435 | 0.432278615 | 0.029857436 |

|                |             |             |
|----------------|-------------|-------------|
| 0.248430374    | 0.016245859 | 0.188138315 |
| 0.079404654    | 0.039468796 | 0.509465757 |
| 0.245157678    | 0.48292299  | 0.025333979 |
| 0.0328428      | 0.072355955 | 0.058681881 |
| 0.140122901    | 0.074457292 | 0.029572883 |
| 0.035224698    | 0.224285009 | 0.251071695 |
| 0.792936742    | 0.282996601 | 0.010889739 |
| 0.857637159    | 0.043359458 | 0.007809582 |
| 0.378396736    | 0.06672041  | 0.036832226 |
| 0.000449911    | 0.109646651 | 0.708485864 |
| 0.994687576    | 0.184475772 | 0.021625968 |
| 0.125311953    | 0.015766328 | 0.766416322 |
| 0.598754533    | 0.446314678 | 0.003976977 |
| 0.158664112    | 0.021881707 | 0.012875869 |
| 0.852658288 NA |             | 0.027963418 |
|                | 0.303896056 | 0.001632149 |
| 0.566304716    | 0.027147963 | 0.25045473  |
| 0.80011486     | 0.882060951 | 0.013228708 |
| 0.010117715    | 0.003088944 | 0.293753447 |
| 0.023321566    | 0.748421036 | 0.52322538  |
| 0.100703621    | 0.015199848 | 0.178143006 |
| 0.898536863    | 0.285512512 | 0.038044046 |
| 0.399438551    | 0.033476429 | 0.071209995 |
| 0.028546691    | 0.621384403 | 0.001009442 |
| 0.648318441    | 0.573244188 | 0.022142906 |
| 0.019061636    | 0.205518495 | 0.940377941 |
| 0.35828739     | 0.573105012 | 0.015146687 |
| 0.233019331    | 0.017308324 | 0.162611789 |
| 0.002748229    | 0.008467524 | 0.136661889 |
| 0.426640347    | 0.624160241 | 0.045359503 |
| 0.511970104    | 0.175037496 | 0.015453113 |
| 0.367087536    | 0.214785576 | 0.000859098 |
| 0.16699457     | 0.004268465 | 0.027482536 |
| 0.047860486    | 0.704910641 | 0.001091764 |
| 0.599089771    | 0.042306853 | 0.010830567 |
| 0.389679744    | 0.712034561 | 0.016558124 |
| 0.095061616    | 0.00124115  | 0.096335839 |
| 0.268424703    | 0.006967923 | 0.225912886 |
| 0.050521054    | 0.014072756 | 0.234248444 |
| 0.281929869    | 0.013666243 | 0.195840451 |
| 0.25413791     | 0.004702683 | 0.700921115 |
| 0.012507323    | 0.232805444 | 0.930687944 |
| 0.42829332     | 0.03127114  | 0.157549914 |
| 0.01495023     | 0.01509794  | 0.489322805 |
| 0.004761224    | 0.110343838 | 0.655848001 |
| 0.00753065     | 0.099658123 | 0.440280401 |
| 0.416763365    | 0.384576116 | 0.039544706 |

NA

|             |             |             |
|-------------|-------------|-------------|
| 0.102453645 | 0.59449478  | 0.014683093 |
| 0.973062682 | 0.530021467 | 0.017752753 |
| 0.350342004 | 0.222321892 | 0.021695658 |
| 0.867507355 | 0.973699712 | 0.008340775 |
| 0.351831398 | 0.863331077 | 0.024805866 |
| 0.501879    | 0.699044261 | 0.019919086 |
| 0.39190441  | 0.179389205 | 0.007348439 |
| 0.001214665 | 0.00543843  | 0.687858193 |
| 0.569149724 | 0.003699624 | 0.023143041 |
| 0.243060293 | 0.025928758 | 0.015876191 |
| 0.734433257 | 0.722835099 | 0.046083207 |
| 0.465369938 | 0.852222218 | 0.002014009 |
| 0.276708347 | 0.47952926  | 0.034881154 |
| 0.112486497 | 0.679235606 | 0.004028494 |
| 0.269952907 | 0.750087597 | 0.049494263 |
| 0.147283786 | 0.021386684 | 0.298934162 |
| 0.007734356 | 0.028761841 | 0.552659727 |
| 0.020651054 | 0.272986092 | 0.052197854 |
| 0.415001647 | 0.674802473 | 0.002504925 |
| 0.570565784 | 0.434687054 | 0.037845335 |
| 0.726861455 | 0.194599966 | 0.033984252 |
| 0.702434184 | 0.143080625 | 0.023579372 |
| 0.276477644 | 0.607101489 | 0.028762045 |
| 0.160099264 | 0.361339217 | 0.003925763 |
| 0.844624526 | 0.922599428 | 1.25E-05    |
| 0.890303778 | 0.018378608 | 0.001750949 |
| 0.795060596 | 0.513511241 | 0.006226998 |
| 0.38570333  | 0.359688182 | 0.029022742 |
| 0.849712637 | 0.784541013 | 0.03551858  |
| 0.027261573 | 0.181964908 | 0.228930981 |
| 0.846546019 | 0.307771104 | 0.027562421 |
| 0.12677554  | 0.817117258 | 0.008899565 |
| 0.560705276 | 0.478831831 | 0.017595968 |
| 0.648471068 | 0.150263976 | 0.00682187  |
| 0.033371396 | 0.316435884 | 0.867426519 |
| 0.934780382 | 0.045362421 | 0.045316159 |
| 0.01309697  | 0.550683535 | 0.198738953 |
| 0.571634367 | 0.222687249 | 0.02536055  |
| 0.982587406 | 0.048767685 | 0.240743355 |
| 0.528737716 | 0.127507751 | 0.025098723 |
| 0.047219183 | 0.05426779  | 0.938375917 |
| 0.499823395 | 0.017425551 | 0.00458943  |
| 0.058280148 | 0.023924493 | 0.791954457 |
| 0.767555518 | 0.023152143 | 0.183240877 |
| 0.255745999 | 0.02934184  | 0.172116526 |
| 0.53952844  | 0.348663986 | 8.97E-05    |
| 0.859017833 | 0.470743168 | 0.033022513 |

|             |             |             |
|-------------|-------------|-------------|
| 0.217184661 | 0.014587565 | 0.232260001 |
| 0.021361415 | 0.219804035 | 0.995259267 |
| 0.683539971 | 0.318647309 | 0.028793779 |
| 0.749764738 | 0.912831264 | 0.024961053 |
| 0.583499196 | 0.337520793 | 0.028192766 |
| 0.016395549 | 0.155928425 | 0.927830985 |
| 0.535211163 | 0.221049008 | 0.02396624  |
| 0.130571338 | 0.246350371 | 0.016679963 |
| 0.682931081 | 0.03693095  | 0.124482933 |
| 0.493557156 | 0.299161454 | 0.016948527 |
| 0.239333881 | 0.036043587 | 0.309601501 |
| 0.068882205 | 0.001024909 | 0.06762632  |
| 0.018047336 | 0.000367959 | 0.473656309 |
| 0.258524898 | 0.961125165 | 0.041090774 |
| 0.504222625 | 0.970415851 | 0.0486367   |
| 0.177003406 | 0.002455901 | 0.051054025 |
| 0.941650124 | 0.676360979 | 0.001383822 |
| 0.978083035 | 0.040650153 | 0.061801474 |
| 0.078536747 | 0.043946519 | 0.179182477 |
| 0.169996014 | 0.013381176 | 0.403755151 |
| 0.042348993 | 0.215247631 | 0.944442359 |
| 0.002005657 | 0.022780886 | 0.812856064 |
| 0.120617399 | 0.026296794 | 0.031816217 |
| 0.298732158 | 0.011658627 | 0.798496368 |
| 0.091451692 | 0.614061933 | 0.003825302 |
| 0.494465826 | 0.53090485  | 0.021238632 |
| 0.028328097 | 0.668349734 | 0.045094321 |
| 0.958045029 | 0.05373063  | 0.035156982 |
| 0.730233657 | 0.034211107 | 0.011837915 |
| 0.793234391 | 0.351439247 | 0.038283319 |
| 0.054774317 | 0.029222303 | 0.265558991 |
| 0.015366976 | 0.778168542 | 6.34E-06    |
| 0.74331219  | 0.982965161 | 0.007988697 |
| 0.108629501 | 0.024490963 | 0.015326709 |
| 0.060007093 | 0.033659544 | 0.483012495 |
| 0.219569555 | 0.16558779  | 0.038208874 |
| 0.012438196 | 0.037377378 | 0.803303941 |
| 0.041740134 | 0.353077049 | 0.969052988 |
| 0.029206188 | 0.013501353 | 0.220516744 |
| 0.130494079 | 0.194752294 | 0.019658826 |
| 0.682550873 | 0.097419824 | 0.015881839 |
| 0.58540169  | 0.130187227 | 0.021828905 |
| 0.036058024 | 0.075438046 | 0.495399344 |
| 0.023518452 | 0.002447467 | 0.726594395 |
| 0.945732822 | 0.132890128 | 0.028645411 |
| 0.322257466 | 0.812651474 | 0.037545522 |
| 0.085487412 | 0.953440547 | 0.023273844 |

|                |             |             |
|----------------|-------------|-------------|
| 0.065915209    | 0.096832553 | 0.023206127 |
| 0.139937084    | 0.779988758 | 0.013233834 |
| 0.805632164    | 0.081777922 | 0.001090784 |
| 0.450915475    | 0.533057779 | 0.002162346 |
| 0.045346929    | 0.720310728 | 0.129188152 |
| 0.276302632    | 0.011588933 | 0.007169954 |
| 0.052112645    | 0.025038301 | 0.973404489 |
| 0.171448289    | 0.112362944 | 0.000357863 |
| 0.358598766    | 0.047267597 | 0.389121012 |
| 0.015949137    | 0.051054514 | 0.194301447 |
| 0.016207644    | 0.131459923 | 0.892909918 |
| 0.708492701    | 0.101096901 | 0.024364205 |
| 0.001013665    | 0.182023701 | 0.000175135 |
| 0.009824053    | 0.418608129 | 0.772292583 |
| 0.011290885    | 0.572724446 | 0.554662914 |
| 0.579397306    | 0.007655494 | 0.040553789 |
| 0.057124051    | 0.904716723 | 0.039097773 |
| 0.70059401     | 0.515945475 | 0.023111531 |
| 0.118895368    | 0.003458659 | 0.696526874 |
| 0.010247793    | 0.410510779 | 0.509167173 |
| 0.784132894    | 0.583896964 | 0.001054956 |
| 0.004218862 NA | NA          |             |
| 0.371104715    | 0.716533659 | 0.037268363 |
| 0.332307373    | 0.006698092 | 0.00018289  |
| 0.491450032    | 0.154634288 | 0.020840388 |
| 0.006432845    | 0.171048511 | 0.286300121 |
| 0.360837037    | 0.12248286  | 0.007913438 |
| 0.02343246     | 0.006383635 | 0.430021464 |
| 0.04078358     | 0.006529993 | 0.205118143 |
| 0.985514197    | 0.192961284 | 0.049772854 |
| 0.169096409    | 0.025713354 | 0.4146669   |
| 0.2415823      | 0.032025602 | 0.135858524 |
| 0.198690243    | 0.031303654 | 0.041239277 |
| 0.264192625    | 0.124401056 | 0.001308199 |
| 0.099001187    | 0.033514616 | 0.554045863 |
| 0.28749365     | 0.024815497 | 0.914404532 |
| 0.775043323    | 0.326816857 | 0.028193305 |
| 0.10684715     | 0.008567037 | 0.109301394 |
| 0.427162698    | 0.782648004 | 0.026088908 |
| 0.020402747    | 0.003791885 | 0.635387494 |
| 0.045901585    | 0.008635234 | 0.412152556 |
| 0.121841093    | 0.016398102 | 0.094576132 |
| 0.091835674    | 0.016525006 | 0.846392076 |
| 0.138333365    | 0.00789855  | 0.079426829 |
| 0.255721431    | 0.037843558 | 0.120870271 |
| 0.860923644    | 0.046004943 | 0.002200097 |
| 0.687511446    | 0.012857414 | 0.072327445 |

|             |             |             |
|-------------|-------------|-------------|
| 0.282838046 | 0.000301444 | 0.166200105 |
| 0.055624133 | 0.025131952 | 0.828654542 |
| 0.152320915 | 0.016421462 | 0.983215841 |
| 0.11393668  | 0.019846205 | 0.109836591 |
| 0.031849733 | 0.510672464 | 0.721663128 |
| 0.048880837 | 0.896733563 | 0.490666815 |
| 0.981752778 | 0.467972128 | 0.043134486 |
| 0.542322253 | 0.135563703 | 0.046034239 |
| 0.386448463 | 0.011644325 | 0.044237709 |
| 0.020150659 | 0.8852842   | 0.137314649 |
| 0.312175034 | 0.012211924 | 0.026457796 |
| 0.043920324 | 0.668383175 | 0.841718154 |
| 0.008463789 | 0.086241267 | 0.148387464 |
| 0.028022143 | 0.728416472 | 0.025669872 |
| 0.548069556 | 0.528399921 | 0.032618233 |
| 0.004733275 | 0.002154669 | 0.952642636 |
| 0.230078741 | 0.030745988 | 0.328110861 |
| 0.011424973 | 0.000179517 | 0.028941724 |
| 0.432584587 | 0.0326424   | 0.197391348 |
| 0.209842117 | 0.038630558 | 0.942871074 |
| 0.80123609  | 0.252025961 | 0.027426019 |
| 0.020353479 | 0.749214478 | 0.872971812 |
| 0.062646484 | 5.59E-05    | 0.109195685 |
| 0.018765839 | 0.077825879 | 0.772124665 |
| 0.018301996 | 0.104874012 | 0.742358335 |
| 0.041071691 | 0.015170447 | 0.767205646 |
| 0.148033007 | 0.041376273 | 0.638877053 |
| 0.823374338 | 0.578326954 | 0.026698899 |
| 0.051636052 | 0.038391318 | 0.770502669 |
| 0.893864995 | 0.614730254 | 0.03843368  |
| 0.330182331 | 0.042922288 | 0.482860795 |
| 0.758730326 | 0.01339168  | 0.000166918 |
| 0.082021361 | 0.025854585 | 0.331350321 |
| 0.915092304 | 0.745848347 | 0.019701251 |
| 0.400147417 | 0.022424701 | 0.786847874 |
| 0.637494142 | 0.478816688 | 0.019191642 |
| 0.71785335  | 0.31712333  | 0.008091911 |
| 0.552125403 | 0.116414295 | 0.006218746 |
| 0.02915349  | 0.000494451 | 0.009185722 |
| 0.789287111 | 0.004997662 | 0.121969828 |
| 0.127258955 | 0.054763346 | 0.027247397 |
| 0.530949993 | 0.033596603 | 0.064660718 |
| 0.542337008 | 0.036727273 | 0.009176963 |
| 0.385889258 | 0.042560976 | 0.401840101 |
| 0.000401591 | 0.907342144 | 0.092993057 |
| 0.832926847 | 0.107019011 | 0.003888996 |
| 0.385281192 | 0.035583857 | 0.100484131 |

|                |             |             |
|----------------|-------------|-------------|
| 0.007455484    | 0.031686418 | 0.655764434 |
| 0.028001683    | 0.406152907 | 0.280832289 |
| 0.03670044     | 0.054531511 | 0.092461544 |
| 0.41452977     | 0.018867379 | 0.120658746 |
| 0.330144805    | 0.040573308 | 0.825957523 |
| 0.036041241    | 0.099968484 | 0.983237374 |
| 0.283816638    | 0.019643993 | 0.061665277 |
| 0.269464124    | 0.065011606 | 0.012316988 |
| 0.090070713    | 0.008959634 | 0.325693582 |
| 0.436807713    | 0.001093001 | 0.003155741 |
| 0.034375282    | 0.927256789 | 0.463914657 |
| 0.022155395    | 0.389592627 | 0.809338823 |
| 0.124601936    | 0.009919287 | 0.044766164 |
| 0.939112377    | 0.462705647 | 0.018936532 |
| 0.011121812    | 0.233958479 | 0.321927419 |
| 0.223892299    | 0.017277475 | 0.119262615 |
| 0.039111766    | 0.766269968 | 0.002289403 |
| 0.826539765    | 0.348747807 | 0.033563127 |
| 0.010238456    | 0.294914697 | 0.4997319   |
| 0.044772496    | 0.105231486 | 0.005762852 |
| 0.898649235    | 0.212324115 | 0.045207311 |
| 0.607806309    | 0.035135538 | 0.000497176 |
| 0.708406089    | 0.628185837 | 0.027074253 |
| 0.006241293    | 0.003786073 | 0.000107648 |
| 0.016574258    | 0.644738837 | 0.337306983 |
| 0.892152366    | 0.643722427 | 0.011306189 |
| 0.015407546    | 0.216713205 | 0.907301724 |
| 0.004037104 NA |             | 0.816926875 |
| 0.460288274    | 0.301926143 | 0.002610436 |
| 0.791713403    | 0.019554849 | 0.007648093 |
| 0.039353025    | 0.288602777 | 0.012797962 |
| 0.884301929    | 0.010186426 | 0.031722022 |
| 0.817380243    | 0.033622598 | 0.0905105   |
| 0.21630258     | 0.27074105  | 0.001700802 |
| 0.385993383    | 0.644233759 | 0.03344988  |
| 0.009557409    | 0.260660891 | 0.110006678 |
| 0.619702286    | 0.375738702 | 0.000324204 |
| 0.058924069    | 0.429815995 | 0.001405201 |
| 0.251655658    | 0.845442264 | 0.011037263 |
| 0.616525073    | 0.554963728 | 0.012574719 |
| 0.84810932     | 0.910944015 | 0.030164109 |
| 0.087660182    | 0.035859734 | 0.204874237 |
| 0.868699518    | 0.763717676 | 0.003989098 |
| 0.08128058     | 0.024827413 | 0.382427828 |
| 0.334350988    | 0.038581103 | 0.077662992 |
| 0.70890363     | 0.84811089  | 0.031863761 |
| 0.022093744    | 0.285079982 | 0.537216447 |



|             |             |             |
|-------------|-------------|-------------|
| 0.86541832  | 0.436597409 | 0.029614024 |
| 0.206701729 | 0.486427022 | 0.033567788 |
| 0.164241384 | 0.936922212 | 0.02447448  |
| 0.040221402 | 0.332394081 | 0.217404338 |
| 0.75230568  | 0.525154476 | 0.039972014 |
| 0.880690485 | 0.028760391 | 0.026646277 |
| 0.147034087 | 0.745037889 | 0.004292838 |
| 0.087042046 | 0.008858173 | 0.807182384 |
| 0.992908466 | 0.074009817 | 0.048234829 |
| 0.858466514 | 0.003380715 | 0.629723176 |
| 0.935111951 | 0.909871593 | 0.041242047 |
| 0.041263348 | 0.092739696 | 0.865473446 |
| 0.991143148 | 0.111116795 | 0.018715082 |
| 0.011849958 | 0.297699584 | 0.057929609 |
| 0.982979512 | 0.699223005 | 0.010532227 |
| 0.117083461 | 0.859610343 | 0.04430964  |
| 0.49861858  | 0.000162713 | 8.05E-05    |
| 0.323103648 | 0.061958819 | 0.02627891  |
| 0.822256747 | 0.561171288 | 0.041192901 |
| 0.782968519 | 0.806713873 | 0.03039472  |
| 0.249269612 | 0.372862426 | 0.028547066 |
| 0.139825995 | 0.047819631 | 0.208836901 |
| 0.769803306 | 0.001797122 | 0.007884902 |
| 0.0261723   | 0.227789846 | 0.160638609 |
| 0.093487203 | 0.209865962 | 0.023066164 |
| 0.670619616 | 0.025587317 | 0.013130777 |
| 0.097459069 | 0.21406307  | 0.000772336 |
| 0.023885752 | 0.541942235 | 0.470913105 |
| 0.047777037 | 0.118512445 | 0.351304641 |
| 0.272483756 | 0.185882034 | 0.027787788 |
| 0.3166526   | 0.000595691 | 0.003811557 |
| 0.140607923 | 0.173868165 | 0.004634637 |
| 0.971539781 | 0.008476209 | 0.343285807 |
| 0.441490728 | 0.503420862 | 0.030323473 |
| 0.118305255 | 0.005036585 | 0.982881925 |
| 0.143801201 | 0.033954624 | 0.255581897 |
| 0.030347514 | 0.065735593 | 0.233642106 |
| 0.119190548 | 0.038144315 | 0.194153098 |
| 0.17334058  | 0.048219209 | 0.592805616 |
| 0.925531805 | 0.885411764 | 0.011916407 |
| 0.581855771 | 0.984119636 | 0.035030692 |
| 0.107728409 | 0.017578705 | 0.417636097 |
| 0.017689991 | 0.185993763 | 0.538018056 |
| 0.080172033 | 0.480796688 | 0.027435587 |
| 0.083164929 | 0.691418797 | 0.042378135 |
| 0.007812093 | 0.156969974 | 0.52912246  |
| 0.581855726 | 0.036041182 | 0.241659825 |

|             |             |             |
|-------------|-------------|-------------|
| 0.054949353 | 0.009405541 | 0.2574944   |
| 0.052352394 | 0.005152245 | 0.288303046 |
| 0.621130686 | 0.160039542 | 0.002635851 |
| 0.319293291 | 0.014380839 | 0.026505326 |
| 0.022070305 | 0.238419576 | 0.153283978 |
| 0.082825037 | 0.263180362 | 0.005453026 |
| 0.09901457  | 0.519279565 | 0.010956761 |
| 0.041187319 | 0.305943027 | 0.708709    |
| 0.049812788 | 0.251593237 | 0.153184601 |
| 0.311057354 | 0.001972288 | 0.032569909 |
| 0.916707053 | 0.096388381 | 0.027586177 |
| 0.897634139 | 0.609830061 | 0.034315227 |
| 0.038884907 | 0.226462719 | 0.539122378 |
| 0.793630565 | 0.021129363 | 0.077854652 |
| 0.047672607 | 0.00555564  | 0.712511279 |
| 0.048414684 | 0.143655965 | 0.542129298 |
| 0.441855968 | 0.897843499 | 0.008029344 |
| 0.143992251 | 0.030189728 | 0.370861131 |
| 0.009727281 | 0.381458965 | 0.812150185 |
| 0.368183152 | 0.138182748 | 0.008130644 |
| 0.832509425 | 0.621367039 | 0.021616132 |
| 0.450832193 | 0.339660889 | 0.007555818 |
| 0.5293195   | 0.046187601 | 0.070061066 |
| 0.230426226 | 0.034618443 | 0.001639062 |
| 0.003368391 | 0.086814129 | 0.085056456 |
| 0.277971279 | 0.869061132 | 0.018588552 |
| 0.233939496 | 0.551716144 | 0.027460242 |
| 0.129649809 | 0.314212984 | 0.049557712 |
| 0.02798524  | 0.773234833 | 0.088315576 |
| 0.02628767  | 0.702627623 | 0.142711051 |
| 0.455580301 | 0.199549355 | 0.009544164 |
| 0.160664051 | 0.910447922 | 0.020579466 |
| 0.252832843 | 0.025413856 | 0.199113078 |
| 0.034291312 | 0.852522757 | 0.383817619 |
| 0.629359303 | 0.068056911 | 0.020115371 |
| 0.706937856 | 0.044675912 | 0.104380037 |
| 0.536733789 | 0.249830059 | 0.026452032 |
| 0.441395485 | 0.708880181 | 0.028446243 |
| 0.492019077 | 0.087915617 | 0.027487111 |
| 0.041337881 | 0.02313849  | 0.683621819 |
| 0.300867985 | 0.273106373 | 0.015830434 |
| 0.037531311 | 0.109257769 | 0.777912904 |
| 0.117036187 | 0.03512643  | 0.5437523   |
| 0.030362604 | 0.099573269 | 0.849282232 |
| 0.045422641 | 0.124421119 | 0.938549209 |
| 0.845604473 | 0.309826898 | 0.015346753 |
| 0.743123045 | 0.158403459 | 0.025846885 |

|             |             |             |
|-------------|-------------|-------------|
| 0.033212346 | 0.017339156 | 0.632490356 |
| 0.049943526 | 0.436657961 | 0.441675899 |
| 0.020648504 | 0.710032741 | 0.035380635 |
| 0.940705005 | 0.425276819 | 0.006628109 |
| 0.2964485   | 0.035214744 | 4.73E-05    |
| 0.01993473  | 0.235721481 | 0.71572209  |
| 0.934413668 | 0.075076071 | 0.002589869 |
| 0.045779042 | 0.349757836 | 0.853031283 |
| 0.029949674 | 0.520219737 | 0.798588839 |
| 0.138957889 | 0.279103293 | 0.02162472  |
| 0.259193419 | 0.021557036 | 0.006471532 |
| 0.164829206 | 0.39074835  | 0.001528161 |
| 0.054251701 | 0.0007483   | 0.201857259 |
| 0.030275849 | 0.968114437 | 0.000269354 |
| 0.758605414 | 0.194397232 | 0.002009797 |
| 0.032530609 | 0.022241667 | 0.006833856 |
| 0.340427682 | 0.00343326  | 0.072297284 |
| 0.321752454 | 0.408314894 | 0.005824427 |
| 0.91101819  | 0.076769791 | 0.042021192 |
| 0.341984686 | 0.511672228 | 0.049744957 |
| 0.834990193 | 0.04901365  | 0.68623768  |
| 0.2471952   | 0.574095722 | 0.010512262 |
| 0.156098136 | 0.012128743 | 0.011702156 |
| 0.383263441 | 0.105868131 | 0.004450212 |
| 0.689680398 | 0.845951068 | 0.000366783 |
| 0.528164035 | 0.048638104 | 0.842970303 |
| 0.166681562 | 0.009759163 | 0.066563077 |
| 0.781848866 | 0.42717883  | 0.014388406 |
| 0.005170631 | 0.614770037 | 0.642737768 |
| 0.016060175 | 0.212490874 | 0.39572325  |
| 0.882735108 | 0.176106835 | 0.008454165 |
| 0.004754198 | 0.922925125 | 0.005672943 |
| 0.804062493 | 0.64591826  | 0.024723478 |
| 0.301226198 | 0.017322288 | 0.011218396 |
| 0.021201902 | 0.011585883 | 0.309162163 |
| 0.739433788 | 0.341636587 | 0.018315946 |
| 0.028333378 | 0.436967831 | 0.065068302 |
| 0.091795478 | 0.011844462 | 0.135216836 |
| 0.017830409 | 0.427772467 | 0.085995496 |
| 0.772863766 | 0.062442249 | 3.55E-05    |
| 0.822102436 | 0.241130985 | 0.046981727 |
| 0.045396355 | 0.207206611 | 0.296830331 |
| 0.009742439 | 0.757498587 | 0.381692282 |
| 0.699829455 | 0.681591304 | 0.037542505 |
| 0.595103589 | 0.33523096  | 0.00309779  |
| 0.004602993 | 0.224431426 | 0.000102397 |
| 0.041242704 | 0.236490293 | 0.811675374 |

|             |             |             |
|-------------|-------------|-------------|
| 0.121903832 | 0.004845859 | 0.970463068 |
| 0.000913888 | 0.005624966 | 0.508579285 |
| 0.751542767 | 0.110639381 | 0.010188478 |
| 0.284737146 | 0.661335986 | 0.0490158   |
| 0.012182917 | 0.390722089 | 0.189444265 |
| 0.811339222 | 0.003605698 | 0.030984003 |
| 0.232556059 | 0.003926535 | 0.005598116 |
| 0.246471094 | 0.002884173 | 0.078054397 |
| 0.307982538 | 0.008155762 | 0.001196397 |
| 0.062128758 | 0.764157182 | 0.015813668 |
| 0.008027138 | 0.034300521 | 0.813347173 |
| 0.010686681 | 0.009819336 | 0.300200865 |
| 0.01209023  | 0.007707213 | 0.051411091 |
| 0.991172013 | 0.173564654 | 0.043467021 |
| 0.822473747 | 0.619353217 | 0.009769463 |
| 0.870208772 | 0.184235809 | 0.023117545 |
| 0.497251351 | 0.072245706 | 0.009955133 |
| 0.304130555 | 0.047257464 | 0.020433825 |
| 0.210442392 | 0.000463677 | 0.00785661  |
| 0.010978769 | 0.083244932 | 0.486926806 |
| 0.012073645 | 0.00036429  | 0.478325634 |
| 0.309585077 | 0.879049243 | 0.035268996 |
| 0.004290733 | 0.207504464 | 0.88259184  |
| 0.311622436 | 0.227338896 | 0.030448908 |
| 0.59455182  | 0.018521026 | 4.33E-05    |
| 0.572533479 | 0.048570494 | 0.471650516 |
| 0.641430378 | 0.038258017 | 0.068949595 |
| 0.723289505 | 0.815486592 | 0.001153932 |
| 0.012691121 | 0.774684855 | 0.312345563 |
| 0.017234581 | 0.175172049 | 0.292173868 |
| 0.46382592  | 0.129394283 | 0.011590813 |
| 0.160274491 | 0.049538958 | 0.458392185 |
| 0.399334714 | 0.038610339 | 0.083350656 |
| 0.137019915 | 0.024364465 | 0.863000538 |
| 0.59630089  | 0.025825518 | 0.126544339 |
| 0.483874414 | 0.538368814 | 0.006671397 |
| 0.030760406 | 0.113430359 | 0.567689137 |
| 0.026960834 | 0.20800913  | 0.861819347 |
| 0.050370142 | 0.024694228 | 0.327903543 |
| 0.356305562 | 0.91882187  | 0.042156777 |
| 0.019095577 | 0.040266942 | 0.354262255 |
| 0.031482202 | 0.316758933 | 0.717829843 |
| 0.237641035 | 7.46E-05    | 0.002038171 |
| 0.103684827 | 0.001404977 | 0.998183056 |
| 0.071877591 | 0.027863983 | 0.115463148 |
| 0.076749738 | 0.046985958 | 0.12673924  |
| 0.815920716 | 0.124270137 | 0.012786505 |

|             |             |             |
|-------------|-------------|-------------|
| 0.60204529  | 0.103327802 | 0.044489977 |
| 0.460162314 | 0.033213795 | 0.930031961 |
| 0.041025625 | 0.242745175 | 0.613625674 |
| 0.032416447 | 0.124307216 | 0.704095042 |
| 0.732044105 | 0.294756532 | 0.045241859 |
| 0.087375265 | 0.044642131 | 0.821327085 |
| 0.391713803 | 0.032757598 | 0.442206136 |
| 0.986904974 | 0.285817032 | 0.011948287 |
| 0.048461367 | 0.473180203 | 0.669379396 |
| 0.781120907 | 0.098029333 | 0.026813656 |
| 0.155670351 | 0.537249828 | 0.006349154 |
| 0.975471017 | 0.681730597 | 0.018978309 |
| 0.04858207  | 0.954473246 | 0.128269516 |
| 0.462633377 | 0.019840378 | 0.273485964 |
| 0.01275356  | 0.406606488 | 0.809447956 |
| 0.502394646 | 0.046328403 | 0.080011022 |
| 0.009267307 | 0.052078536 | 0.758414358 |
| 0.180173517 | 0.030076851 | 0.435198776 |
| 0.142080734 | 0.041188394 | 0.095176893 |
| 0.63589458  | 0.03606862  | 0.216970577 |
| 0.004676527 | 0.006493814 | 0.773148414 |
| 0.746823797 | 0.43064595  | 0.04124696  |
| 0.848366114 | 0.004700382 | 0.155218148 |
| 0.420131247 | 0.260117076 | 0.044381344 |
| 0.29608194  | 0.006972011 | 0.218160528 |
| 0.027968011 | 0.001568538 | 0.09341579  |
| 0.995016605 | 0.213045363 | 0.0205638   |
| 0.038503792 | 0.027016908 | 0.251883211 |
| 0.165024957 | 0.038203509 | 0.371416927 |
| 0.024281338 | 1.61E-05    | 0.024654601 |
| 0.226837037 | 0.930965939 | 0.008303225 |
| 0.03091057  | 0.373377679 | 0.003224676 |
| 0.132349532 | 0.176570467 | 0.030984305 |
| 0.03750689  | 0.74254016  | 0.002747068 |
| 0.161527783 | 0.044236559 | 0.180311625 |
| 0.026841178 | 0.023531789 | 0.709635367 |
| 0.00497465  | 0.151726116 | 0.039586716 |
| 0.060209463 | 0.014263041 | 0.956803059 |
| 0.563396563 | 0.713463318 | 0.040617235 |
| 0.195391653 | 0.095409308 | 0.018889414 |
| 0.027520301 | 0.073443069 | 0.012348948 |
| 0.034307965 | 0.005069744 | 0.774495674 |
| 0.494410077 | 0.269357834 | 0.044194407 |
| 0.008845269 | 0.22372006  | 0.747611002 |
| 0.812205863 | 0.077737153 | 0.010531728 |
| 0.801220192 | 0.013115307 | 0.000281022 |
| 0.53514184  | 0.659397723 | 0.023610044 |

|             |             |             |
|-------------|-------------|-------------|
| 0.035106699 | 0.006290661 | 0.421698636 |
| 0.069781652 | 0.032457165 | 0.001964641 |
| 0.013812764 | 0.024627934 | 0.42042809  |
| 0.002630999 | 0.355598404 | 0.777367048 |
| 0.009691094 | 0.682159594 | 0.219179897 |
| 0.433462849 | 0.037755565 | 0.578582239 |
| 0.035772745 | 0.001204147 | 0.890888735 |
| 0.58493847  | 0.051944658 | 0.004864192 |
| 0.116520694 | 0.004625977 | 0.965211964 |
| 0.000660224 | 0.011113955 | 0.002924765 |
| 0.163541776 | 0.000670379 | 0.16417858  |
| 0.161868048 | 0.027378035 | 0.140874529 |
| 0.108899671 | 0.016802512 | 0.769911001 |
| 0.895934896 | 0.950530978 | 0.030079362 |
| 0.042704011 | 0.009943268 | 0.800282358 |
| 0.014999607 | 0.065702708 | 0.344806576 |
| 0.034020058 | 0.034059154 | 0.245960826 |
| 0.100099028 | 0.611721886 | 0.029487644 |
| 0.013374734 | 0.481827852 | 0.169757654 |
| 0.032311016 | 0.214313218 | 0.146593908 |
| 0.001822618 | 0.000175471 | 0.92825238  |
| 0.000915694 | 0.000202978 | 0.32251658  |
| 0.207616061 | 0.014055521 | 0.03402719  |
| 0.053186326 | 0.049406797 | 0.236608788 |
| 0.441355171 | 0.665170337 | 0.04338738  |
| 0.041327031 | 0.509975595 | 0.872855345 |
| 0.423441909 | 0.920782652 | 0.024037378 |
| 0.110402738 | 0.00969293  | 0.408658093 |
| 0.40473247  | 0.17916771  | 0.001381609 |
| 0.098544892 | 0.302339793 | 0.026636877 |
| 0.1817337   | 0.37683123  | 0.049251529 |
| 0.013916738 | 0.649298945 | 0.120477932 |
| 0.62394086  | 0.608170305 | 0.024238985 |
| 0.530604022 | 0.001709796 | 0.004020747 |
| 0.640389566 | 0.296345375 | 0.04316365  |
| 0.150847511 | 0.427058426 | 0.038678299 |
| 0.972270582 | 0.175253973 | 0.016269568 |
| 0.429857057 | 0.171084701 | 0.021632838 |
| 0.013334802 | 0.110177588 | 0.834213719 |
| 0.47976619  | 0.469673629 | 0.000977061 |
| 0.237009482 | 0.020948726 | 0.131018342 |
| 0.325763347 | 0.034383844 | 0.013934021 |
| 0.20937785  | 0.012146479 | 0.114314327 |
| 0.155295923 | 0.472736834 | 0.032892947 |
| 0.359182697 | 0.006651837 | 0.031586655 |
| 0.147658095 | 0.028312637 | 0.11909697  |
| 0.323494268 | 0.012410487 | 0.106954147 |

|             |             |             |
|-------------|-------------|-------------|
| 0.009912171 | 0.066767174 | 0.681937998 |
| 0.032087417 | 0.551039225 | 0.944498037 |
| 0.000582136 | 0.062036981 | 0.742238749 |
| 0.861467906 | 0.132560027 | 0.007596803 |
| 0.547708965 | 0.629147897 | 0.019837329 |
| 0.865826664 | 0.046241673 | 0.202592393 |
| 0.278275571 | 0.221919434 | 0.031821623 |
| 0.002811721 | 3.41E-05    | 0.049395324 |
| 0.566780497 | 0.128098321 | 0.019775751 |
| 0.918965351 | 0.342231729 | 0.003255146 |
| 0.06722772  | 0.039998638 | 0.168966056 |
| 0.047763359 | 0.43792198  | 0.832534528 |
| 0.029583282 | 0.651875957 | 0.020183051 |
| 0.771835465 | 0.030114803 | 0.985119124 |
| 0.146669495 | 0.027135627 | 0.426026325 |
| 0.647267585 | 0.38417459  | 0.00327487  |
| 0.000607395 | 0.005466121 | 0.463874121 |
| 0.742259238 | 0.012273716 | 0.017099013 |
| 0.032353977 | 0.00287181  | 0.031099037 |
| 0.011441066 | 0.331934078 | 0.441530654 |
| 0.127262271 | 0.002290847 | 0.017872987 |
| 0.455639137 | 0.010870474 | 0.605582699 |
| 0.426518171 | 0.095191085 | 0.005504246 |
| 0.037460855 | 0.265984061 | 0.972718015 |
| 0.014571876 | 0.554680796 | 0.788006669 |
| 0.089075315 | 0.042476088 | 0.111251676 |
| 0.554676629 | 0.381891106 | 0.047606319 |
| 0.593049424 | 0.08082906  | 6.95E-05    |
| 0.4525672   | 0.048788062 | 0.122589759 |
| 0.335235334 | 0.022413035 | 0.082061744 |
| 0.011774051 | 0.017236027 | 0.093948975 |
| 0.006844535 | 0.026748037 | 0.470631018 |
| 0.001967555 | 0.756457999 | 0.0402628   |
| 0.000112641 | 0.114515904 | 0.659230151 |
| 0.001559482 | 0.011183768 | 0.712634268 |
| 0.006748967 | 0.117847658 | 0.890290248 |
| 0.004198576 | 0.46658366  | 0.203474287 |
| 0.055462393 | 0.325096365 | 0.00452717  |
| 0.010021014 | 0.060226731 | 0.837172707 |
| 0.013772411 | 0.542135986 | 0.549741949 |
| 0.001865802 | 0.000419996 | 0.225434321 |
| 0.1446538   | 0.065435201 | 0.038618228 |
| 0.00122196  | 0.186460755 | 0.335195731 |
| 0.01215953  | 0.288291827 | 0.532427279 |
| 0.001468235 | 0.338719983 | 0.002683987 |
| 0.049352809 | 0.826255676 | 0.935391769 |
| 0.002065511 | 0.467176645 | 0.040420542 |

|             |             |             |
|-------------|-------------|-------------|
| 0.028591653 | 0.481144983 | 0.198059394 |
| 0.001768577 | 0.019057525 | 0.456011747 |
| 0.00238292  | 0.08036372  | 0.995239812 |
| 0.032122497 | 0.058660729 | 0.258061812 |
| 0.012727472 | 0.39850389  | 0.546657362 |
| 0.003421762 | 0.091605961 | 0.888159937 |
| 0.019152903 | 0.498874018 | 0.432760899 |
| 4.31E-06    | 0.005575299 | 0.279311255 |
| 0.000805763 | 0.039020187 | 0.276448475 |
| 0.004327098 | 0.012031485 | 0.411453296 |
| 0.000219122 | 0.006444366 | 0.416522585 |
| 0.007112593 | 0.047606478 | 0.440320702 |
| 0.024934418 | 0.123240395 | 0.703527479 |
| 0.061929975 | 0.003326762 | 0.0001842   |
| 0.001953858 | 0.687239862 | 0.007627871 |
| 0.003731187 | 0.255914347 | 0.197786001 |
| 0.000211209 | 0.1147132   | 0.061151795 |
| 0.011962217 | 0.336160425 | 0.152134838 |
| 0.001364671 | 0.048488706 | 0.925289456 |
| 0.002254351 | 0.961660098 | 0.013551446 |
| 0.014982099 | 0.677985209 | 0.015967727 |
| 0.00157697  | 0.49150253  | 0.043141109 |
| 0.000627956 | 0.211849544 | 0.072272841 |
| 0.004977277 | 0.142200984 | 0.913353887 |
| 0.000688878 | 0.002677504 | 0.310128237 |
| 0.008545218 | 0.4080218   | 0.654931172 |
| 0.099083916 | 0.401520858 | 0.03020666  |
| 0.007319797 | 0.000237824 | 0.282611159 |
| 0.007600401 | 0.00086734  | 0.003823329 |
| 0.836109363 | 0.815647298 | 0.043056575 |
| 0.036503385 | 0.053551952 | 0.71067697  |
| 0.010960869 | 0.014975372 | 0.426730961 |
| 0.436014645 | 0.187676242 | 0.00283527  |
| 0.01909621  | 0.169046253 | 0.703359715 |
| 0.64241823  | 0.049670526 | 0.003753805 |
| 0.038806629 | 0.71795133  | 0.027852306 |
| 0.553478913 | 0.028778893 | 0.020620361 |
| 0.089656854 | 0.014355593 | 0.094381281 |
| 0.926675591 | 0.085044305 | 0.000697279 |
| 0.90492436  | 0.104596445 | 0.029803579 |
| 0.565137204 | 3.10E-05    | 3.73E-09    |
| 0.655282505 | 0.009382199 | 0.579641618 |
| 0.928692721 | 0.193549358 | 0.035363772 |
| 0.033587548 | 0.091716614 | 1.09E-05    |
| 0.04593765  | 0.607483117 | 0.005299424 |
| 0.968037196 | 0.041253047 | 0.000189823 |
| 0.559727292 | 0.17110143  | 0.025495264 |



|                |             |             |
|----------------|-------------|-------------|
| 0.09890529     | 0.003848309 | 0.001078896 |
| 0.767494282    | 0.001375393 | 2.83E-05    |
| 0.842968264    | 0.005428304 | 0.004766844 |
| 0.671186366    | 0.003659699 | 0.000612634 |
| 0.03702021     | 0.63129667  | 0.250524789 |
| 0.040606229    | 0.702145077 | 0.050637066 |
| 0.004401407    | 0.086036344 | 0.377705326 |
| 0.331447316    | 0.007012753 | 0.023129667 |
| 0.264542034    | 0.990711684 | 0.035338608 |
| 0.021637875    | 0.02412779  | 0.170689841 |
| 0.029420641    | 0.004704194 | 0.112411945 |
| 0.182106037    | 0.043717667 | 0.189053399 |
| 0.854968852 NA |             | 0.008774805 |
| 0.22665501     | 0.015585079 | 0.693391637 |
| 0.016581261    | 0.025871533 | 0.425577851 |
| 0.48991517     | 0.029296406 | 0.516983533 |
| 0.574367003    | 0.649136885 | 0.016657546 |
| 0.749444219    | 0.07199535  | 0.001844332 |
| 0.005848592    | 0.000412648 | 0.580099326 |
| 0.249110019    | 0.014684351 | 0.436905366 |
| 0.00416743     | 0.09599978  | 0.000942902 |
| 0.000554509    | 0.725111025 | 0.169241298 |
| 0.207519416    | 0.018904813 | 0.111730734 |
| 0.815409177    | 0.462787507 | 0.039836844 |
| 0.187145321    | 0.167159866 | 0.007146703 |
| 0.82403773     | 0.060096969 | 0.004974115 |
| 0.035171991    | 0.269646252 | 0.110290883 |
| 0.591232402    | 0.941684381 | 0.021774887 |
| 0.3897738      | 0.007288208 | 0.011343752 |
| 0.18396951     | 0.042822946 | 0.257419356 |
| 0.201858477    | 0.018358965 | 0.132744814 |
| 0.383983123    | 0.831122317 | 0.031518985 |
| 0.626670929    | 0.665743491 | 0.011908246 |
| 0.218913012    | 0.001978419 | 0.000359584 |
| 0.002723118    | 0.024680874 | 0.605852337 |
| 0.002409807    | 0.300109629 | 0.502180382 |
| 0.059686014    | 0.023829659 | 0.77316975  |
| 0.033111599    | 0.626941027 | 0.385822784 |
| 0.000619733    | 0.148725192 | 0.76334331  |
| 0.006497893    | 0.001722087 | 0.376327836 |
| 0.031046333    | 0.826676754 | 0.461565472 |
| 0.665471938    | 0.096307972 | 0.007828624 |
| 0.014441292    | 8.50E-05    | 0.073464336 |
| 0.127356995    | 0.041292661 | 0.032018117 |
| 0.206814372    | 0.015708274 | 0.011525082 |
| 0.552297987    | 0.189860635 | 0.002028612 |
| 0.05144961     | 0.473337683 | 0.006204569 |

|             |             |             |
|-------------|-------------|-------------|
| 0.896426546 | 0.829968744 | 0.042011264 |
| 0.004746117 | 0.622134066 | 0.287142138 |
| 0.415124414 | 0.070930963 | 0.047635838 |
| 0.404661642 | 0.043926528 | 0.118774629 |
| 0.11521029  | 0.030781363 | 0.34920127  |
| 0.020273098 | 0.03989865  | 0.412109959 |
| 0.991279362 | 0.268815858 | 0.030733201 |
| 0.334509195 | 0.470188748 | 0.006592155 |
| 0.408868373 | 0.99220454  | 0.031066153 |
| 0.622003099 | 0.172370446 | 0.001180651 |
| 0.039912036 | 0.326448673 | 0.419043427 |
| 0.534227682 | 0.074909473 | 0.000905232 |
| 0.028835689 | 0.205221948 | 0.556433136 |
| 0.579182682 | 0.04211837  | 0.365964323 |
| 0.704400244 | 0.011663804 | 0.000125678 |
| 0.141431391 | 0.02404246  | 0.079319197 |
| 0.432901349 | 0.014098874 | 0.223381449 |
| 0.517610511 | 0.049486779 | 0.081598911 |
| 0.029917292 | 0.008359637 | 0.551734488 |
| 0.650215704 | 0.015135309 | 0.543405467 |
| 0.083846451 | 0.529805297 | 0.020886392 |
| 0.008682559 | 0.830549439 | 0.523804471 |
| 0.994771111 | 0.715979419 | 0.047877145 |
| 0.230978249 | 0.01211591  | 0.490466054 |
| 0.036864031 | 0.691505555 | 0.191568079 |
| 0.010234294 | 0.45025502  | 0.00488144  |
| 0.104604429 | 0.436869061 | 0.006258629 |
| 0.743698409 | 0.719753183 | 0.037145664 |
| 0.40487688  | 0.397638486 | 0.005700862 |
| 0.647162271 | 0.0352145   | 0.186749319 |
| 0.311995235 | 0.384242307 | 0.015089391 |
| 0.044400255 | 0.490957764 | 0.744730896 |
| 0.838039816 | 0.362732582 | 0.049705886 |
| 0.208249366 | 0.039731949 | 0.54666626  |
| 0.919520284 | 0.02788712  | 0.074546253 |
| 0.015278785 | 0.988902064 | 0.239524072 |
| 0.712717733 | 0.565291733 | 0.005356504 |
| 0.030394577 | 0.251386362 | 0.346846205 |
| 0.778949074 | 0.14631887  | 0.004359223 |
| 0.070216479 | 0.02145276  | 0.140421815 |
| 0.3303463   | 0.473355587 | 0.042642956 |
| 0.016711346 | 0.037308514 | 0.779663205 |
| 0.662121058 | 0.268355971 | 0.039618015 |
| 0.592653566 | 0.192708912 | 0.014288112 |
| 0.029843065 | 0.042315495 | 0.193430684 |
| 0.038384799 | 0.00076695  | 0.920509857 |
| 0.044057394 | 0.019847876 | 0.960619116 |

|             |                |             |
|-------------|----------------|-------------|
| 0.441903813 | 0.000115975    | 0.015612051 |
| 0.013549229 | 0.214416803    | 0.47819487  |
| 0.843825437 | 0.160880497    | 0.001960862 |
| 0.005745875 | 0.000489888    | 0.053438091 |
| 0.809756964 | 0.024011663    | 0.074279708 |
| 0.98582263  | 0.611113733    | 0.046392027 |
| 0.164922375 | 0.041941816    | 0.275141278 |
| 0.224561776 | 0.032617907    | 0.517373026 |
| 0.38232359  | 0.017468904    | 0.008562193 |
| 0.002354393 | 0.729789463 NA |             |
| 4.40E-06    | 0.044718997    | 0.076738162 |
| 0.299805911 | 0.58295079     | 0.00543272  |
| 0.264901556 | 0.030627666    | 0.02184066  |
| 0.013565591 | 0.000552835    | 0.550122406 |
| 0.250569072 | 0.062063385    | 0.022189013 |
| 0.14015119  | 0.03763054     | 0.002139628 |
| 0.133824584 | 0.004502048    | 0.04178056  |
| 0.028062029 | 0.363240506    | 0.978002827 |
| 0.805093155 | 0.079173707    | 0.000923636 |
| 0.668117909 | 0.226368512    | 0.04285603  |
| 0.023053144 | 0.047023773    | 0.071033347 |
| 0.200152306 | 0.003392763    | 0.011469523 |
| 0.315063963 | 0.42708069     | 0.043449094 |
| 0.989373486 | 0.648666271    | 0.013792099 |
| 0.102278968 | 0.886252777    | 0.01674168  |
| 0.021537546 | 0.000940402    | 0.229507568 |
| 0.041689076 | 0.022486545    | 0.858686183 |
| 0.026531878 | 0.241800154    | 0.569040233 |
| 0.036011441 | 0.004892158    | 0.569593439 |
| 0.061938283 | 0.009570665    | 0.863250202 |
| 0.795186301 | 0.23967767     | 0.02642046  |
| 0.217582152 | 0.822729916    | 0.037470045 |
| 0.60906042  | 0.842039509    | 0.029436382 |
| 0.03872913  | 0.681777152    | 0.967781272 |
| 0.162645937 | 0.510814037    | 0.036032316 |
| 0.762740262 | 0.040863651    | 0.131644172 |
| 0.83951044  | 0.273360564    | 0.012401687 |
| 0.977378393 | 0.297658316    | 0.044845325 |
| 0.292320057 | 0.139054521    | 4.22E-05    |
| 0.018412955 | 0.001524363    | 0.389889434 |
| 0.225266471 | 0.119348635    | 0.000226053 |
| 0.050140573 | 0.014852847    | 0.137641263 |
| 0.009925242 | 0.483587205    | 0.734570947 |
| 0.208346495 | 0.713255805    | 0.008378174 |
| 0.751499199 | 0.362958548    | 0.01083527  |
| 0.198789257 | 0.007036082    | 0.128898745 |
| 0.096163827 | 0.650812692    | 0.017544681 |

|             |             |             |
|-------------|-------------|-------------|
| 0.568662613 | 0.395733456 | 0.041826926 |
| 0.57022927  | 0.026318607 | 0.002080654 |
| 0.085038623 | 0.039817191 | 0.681183991 |
| 0.718532642 | 0.349452784 | 0.030617196 |
| 0.250129695 | 0.034578442 | 0.08051122  |
| 0.155526193 | 0.917630917 | 0.003844383 |
| 0.55821803  | 0.36775745  | 0.035609473 |
| 0.247129638 | 0.884603983 | 0.005553472 |
| 0.029998796 | 0.170432704 | 0.104378112 |
| 0.011780601 | 0.402297204 | 0.720682392 |
| 0.468589656 | 0.297733949 | 0.017137657 |
| 0.523867342 | 0.014234441 | 0.000784469 |
| 0.65527176  | 0.789175885 | 0.02959699  |
| 0.044980809 | 0.180443168 | 0.442901917 |
| 0.116526456 | 0.510844113 | 0.041824322 |
| 0.018013055 | 0.309202927 | 0.913612922 |
| 0.86977592  | 0.0435447   | 0.016972773 |
| 0.917330044 | 0.073284891 | 0.0158906   |
| 0.103920447 | 0.56996817  | 0.002166395 |
| 0.022955567 | 0.372783616 | 0.086660179 |
| 0.153574946 | 0.020601701 | 0.307082162 |
| 0.972329929 | 0.007774015 | 0.011251225 |
| 0.076224691 | 0.25508732  | 0.000254314 |
| 0.035171991 | 0.481240373 | 0.9821412   |
| 0.18563943  | 0.022670485 | 0.603616555 |
| 0.030805673 | 0.886890548 | 0.104980172 |
| 0.537687361 | 0.102254119 | 0.010478962 |
| 0.00349154  | 0.090880164 | 0.537903261 |
| 0.037143213 | 0.405737597 | 0.000455458 |
| 0.263956971 | 0.042068235 | 0.029691358 |
| 0.596082754 | 0.980945417 | 0.008685458 |
| 0.972026339 | 0.301880582 | 0.002235703 |
| 0.031479201 | 0.023816688 | 0.96456537  |
| 0.150968341 | 0.02833661  | 0.000972648 |
| 0.815464039 | 0.096568774 | 0.002569235 |
| 0.883268941 | 0.426191831 | 0.019784595 |
| 0.301970826 | 0.794696326 | 0.040487894 |
| 0.303722223 | 0.370206113 | 0.02444515  |
| 0.043480633 | 0.325139905 | 0.009727723 |
| 0.141567442 | 0.014058776 | 0.838429082 |
| 0.038479014 | 0.042191052 | 0.652668753 |
| 0.169702041 | 0.000295357 | 0.009737809 |
| 0.282637335 | 0.022664715 | 0.360517712 |
| 0.080783688 | 0.013827943 | 0.733766056 |
| 0.026297468 | 0.044950658 | 0.11179473  |
| 0.044351818 | 0.861817352 | 0.000849561 |
| 0.015368436 | 0.001290183 | 0.074379463 |

|             |             |             |
|-------------|-------------|-------------|
| 0.136518406 | 0.036378595 | 0.446503347 |
| 0.699035274 | 0.801889965 | 0.000218521 |
| 0.930939881 | 0.378729926 | 0.033566358 |
| 0.124199289 | 0.003847061 | 0.424625348 |
| 0.004901606 | 0.802598021 | 2.85E-05    |
| 0.467063018 | 0.112403286 | 0.004539957 |
| 0.398247411 | 0.069173573 | 0.048801846 |
| 0.915040394 | 0.559527144 | 0.045623406 |
| 0.195304765 | 0.047206336 | 0.17245769  |
| 0.014759179 | 0.080924228 | 0.770623698 |
| 0.075495489 | 0.087613427 | 0.007988473 |
| 0.527228167 | 0.162310096 | 0.039635644 |
| 0.046207501 | 0.565023489 | 0.235172408 |
| 0.227481443 | 0.85365914  | 0.006766997 |
| 0.038387164 | 0.65490515  | 0.154528855 |
| 0.061485903 | 0.043877731 | 0.987887619 |
| 0.02366551  | 0.856988643 | 0.367942255 |
| 0.445702182 | 0.0205772   | 0.401597776 |
| 1.82E-05    | 0.000962213 | 0.882460801 |
| 0.400852883 | 0.026420518 | 0.30172838  |
| 0.530157097 | 0.566430752 | 0.026810877 |
| 0.973350991 | 0.067823618 | 0.002563005 |
| 0.939634802 | 0.814353584 | 0.039245201 |
| 0.240817    | 0.735505188 | 0.007086389 |
| 0.238240076 | 0.579276843 | 0.000526637 |
| 0.061710805 | 0.021292371 | 0.027767911 |
| 0.207157218 | 0.0622906   | 0.022443535 |
| 0.018412073 | 0.037094054 | 0.6923813   |
| 0.080680758 | 0.002432936 | 0.014084138 |
| 0.041185671 | 0.627860314 | 0.254803522 |
| 0.682689737 | 0.031846015 | 0.127482252 |
| 0.007550496 | 0.718803185 | 0.121072951 |
| 0.152899556 | 0.007907107 | 0.048280789 |
| 0.285494787 | 0.022761299 | 0.01351555  |
| 0.869804959 | 0.226855906 | 0.000386466 |
| 0.10557693  | 0.03873653  | 0.060098342 |
| 0.048899472 | 0.703924077 | 0.003027747 |
| 0.024703765 | 0.779324105 | 0.245098579 |
| 0.049461857 | 0.120392064 | 0.734343326 |
| 0.611167643 | 0.449533458 | 0.009445558 |
| 0.141156025 | 0.767521051 | 0.000106104 |
| 0.017226344 | 0.215200364 | 0.000709461 |
| 0.025162548 | 0.151320889 | 0.777377355 |
| 0.015111762 | 0.345808396 | 0.695955619 |
| 0.515876775 | 0.0401098   | 0.282787625 |
| 0.121751523 | 0.480697001 | 0.039195765 |
| 0.859268225 | 0.966030335 | 0.008476894 |

|             |             |             |
|-------------|-------------|-------------|
| 0.285451658 | 0.567098839 | 0.041832722 |
| 0.787038396 | 0.133658237 | 0.036588822 |
| 0.53452826  | 0.345379475 | 0.009010467 |
| 0.662645158 | 0.668700311 | 0.030102052 |
| 0.022322084 | 0.003271064 | 0.492713843 |
| 0.004511382 | 0.773536455 | 0.005603427 |
| 0.456935795 | 0.148083954 | 0.005494089 |
| 0.029658818 | 0.24432316  | 0.982052307 |
| 0.276296883 | 0.296009716 | 0.016721509 |
| 0.040075256 | 0.537164495 | 0.149466057 |
| 0.034424977 | 0.015510391 | 0.654544143 |
| 0.179922779 | 0.01367189  | 0.701945035 |
| 0.663159657 | 0.181241362 | 0.035199901 |
| 0.027294717 | 0.918586795 | 6.30E-05    |
| 0.035765842 | 0.028263374 | 0.278493256 |
| 0.04269349  | 0.658775486 | 0.685905961 |
| 0.327216949 | 0.729587752 | 0.03259644  |
| 0.835773602 | 0.863939369 | 0.008051094 |
| 0.580279718 | 0.219924073 | 0.006299437 |
| 0.338821552 | 0.509123213 | 0.031882084 |
| 0.491059762 | 0.407040237 | 0.001786483 |
| 0.044244875 | 0.264981968 | 0.023129722 |
| 0.890338609 | 0.160988677 | 0.010656233 |
| 0.477015679 | 0.082511465 | 0.048145853 |
| 0.294812048 | 0.004171768 | 0.420788779 |
| 0.592247869 | 0.425726386 | 0.001518131 |
| 0.000439435 | 0.301024524 | 0.500206895 |
| 0.045949817 | 0.078984478 | 0.816621884 |
| 0.042958852 | 0.654677757 | 0.209262653 |
| 0.043585114 | 0.001886437 | 0.08019311  |
| 0.027244769 | 0.012525476 | 0.313185942 |
| 0.059110476 | 0.041893608 | 0.031857257 |
| 0.645467953 | 0.019849914 | 0.281227103 |
| 0.015920387 | 0.001074807 | 0.403018136 |
| 0.540452433 | 0.021925443 | 0.399708071 |
| 0.197825783 | 0.001898798 | 0.573656944 |
| 0.605081984 | 0.140291483 | 0.04316876  |
| 0.35876349  | 0.037601231 | 0.084327947 |
| 0.041017852 | 0.160135268 | 0.329969619 |
| 0.674464723 | 0.081524923 | 0.017745235 |
| 0.014261765 | 0.186103423 | 0.551872543 |
| 4.27E-05    | 0.003580189 | 0.512590768 |
| 7.60E-05    | 0.151879538 | 0.274303135 |
| 0.096318965 | 0.030045061 | 0.838853759 |
| 0.06117517  | 0.600236889 | 0.000258966 |
| 0.844633915 | 0.072668689 | 0.018154588 |
| 0.344396924 | 0.013385565 | 0.032640435 |

|             |             |             |
|-------------|-------------|-------------|
| 0.669661246 | 0.388911822 | 0.016178481 |
| 0.930301396 | 0.29075043  | 0.045962556 |
| 0.720522073 | 0.088090709 | 0.007682952 |
| 0.458527265 | 0.142046641 | 0.011435638 |
| 0.000892343 | 0.958106236 | 0.492161773 |
| 0.872177214 | 0.71078076  | 0.029413607 |
| 0.223980815 | 0.024887018 | 0.130125658 |
| 0.231066458 | 0.043130334 | 0.338171371 |
| 0.043556594 | 0.813225341 | 0.446217931 |
| 0.507375757 | 0.036915855 | 0.878416581 |
| 0.96153749  | 0.039718116 | 0.081284356 |
| 0.031180341 | 0.089822782 | 0.928976938 |
| 0.64315018  | 0.601403304 | 0.003968183 |
| 0.541005967 | 0.80240269  | 0.02460541  |
| 0.204917747 | 0.768095576 | 0.002481677 |
| 0.864789001 | 0.025784868 | 0.012531623 |
| 0.467390348 | 0.406378041 | 0.034888614 |
| 0.689043424 | 0.052952423 | 0.026665481 |
| 0.004332524 | 0.096183283 | 0.585315292 |
| 0.073411504 | 0.085084011 | 0.016882886 |
| 0.363748915 | 0.864577122 | 0.038391536 |
| 0.026751094 | 0.074645956 | 0.803835473 |
| 0.841611657 | 0.127319314 | 0.007150924 |
| 0.045084158 | 0.702948495 | 0.644141865 |
| 0.53843086  | 0.047325658 | 0.351947646 |
| 0.614352674 | 0.094307953 | 0.035488507 |
| 0.0302616   | 0.157446527 | 0.906051487 |
| 0.019837109 | 0.135262349 | 0.719673975 |
| 0.935967079 | 0.185265372 | 0.042727472 |
| 0.738392854 | 0.463348821 | 0.015303139 |
| 0.267346111 | 0.008768224 | 0.025454323 |
| 0.041462412 | 1.90E-10    | 2.15E-08    |
| 0.049732285 | 0.596485306 | 0.15187683  |
| 0.065433595 | 0.020284021 | 0.88141659  |
| 0.292585177 | 0.01640504  | 0.299932391 |
| 0.692949589 | 0.475018426 | 0.020824853 |
| 0.911287888 | 0.48483906  | 0.034216215 |
| 0.843817177 | 0.60079595  | 0.015681535 |
| 0.06168105  | 4.98E-05    | 0.025585284 |
| 0.098226888 | 0.584255333 | 0.042502404 |
| 0.307566331 | 0.020837841 | 0.065763225 |
| 0.614126589 | 0.005048415 | 0.008507426 |
| 0.029810418 | 0.023898282 | 0.308729724 |
| 0.085528069 | 0.576752988 | 0.006754474 |
| 0.628677374 | 0.184205057 | 0.006332705 |
| 0.103864263 | 0.048059191 | 0.141240443 |
| 0.50744416  | 0.388933688 | 0.032516076 |

|             |             |             |
|-------------|-------------|-------------|
| 0.4468651   | 0.843125299 | 0.044380954 |
| 0.076206352 | 0.000478507 | 0.309210824 |
| 0.308422588 | 0.020652907 | 0.05631373  |
| 0.091057097 | 0.698009864 | 0.003097787 |
| 0.886237299 | 0.813337945 | 0.040541954 |
| 0.020842589 | 0.109780731 | 0.884011188 |
| 0.399822023 | 0.01353487  | 0.003045264 |
| 0.319451527 | 0.277724074 | 0.029329089 |
| 0.390664269 | 0.047919504 | 0.547000549 |
| 0.003864635 | 0.263397875 | 0.574735424 |
| 0.012414363 | 0.41116057  | 0.131857483 |
| 0.251885714 | 0.458644927 | 0.038300306 |
| 0.027313259 | 0.771934744 | 0.379763835 |
| 0.486578349 | 0.000282654 | 0.000801261 |
| 0.245424279 | 0.148485891 | 0.001179373 |
| 0.338558919 | 0.536596468 | 0.040047117 |
| 0.259642021 | 0.0079859   | 0.103558773 |
| 0.60115485  | 0.106193204 | 0.0375817   |
| 0.198539037 | 0.40272891  | 0.046687205 |
| 0.410737696 | 0.005818856 | 0.28457027  |
| 0.886502037 | 0.232383756 | 0.013724147 |
| 0.42593589  | 0.632707399 | 0.009752933 |
| 0.01027979  | 0.047660629 | 0.352682542 |
| 0.08446131  | 0.045699755 | 0.533125908 |
| 0.001995011 | 0.000343349 | 0.09275369  |
| 0.012519811 | 0.078827344 | 0.827536184 |
| 0.1369467   | 0.045331217 | 0.237459806 |
| 0.022360974 | 0.002471047 | 0.17889041  |
| 0.01795098  | 0.002190055 | 0.113250395 |
| 0.908352999 | 0.336365408 | 0.019913857 |
| 0.70477071  | 0.295884041 | 0.037932532 |
| 0.008147665 | 0.166193532 | 0.09737523  |
| 0.186802594 | 0.129143172 | 0.001411545 |
| 0.006306609 | 0.111963986 | 0.545828943 |
| 0.757174374 | 0.764927098 | 0.005589537 |
| 0.0057429   | 0.914054159 | 0.062257763 |
| 0.697579616 | 0.640295664 | 0.020444584 |
| 0.785309487 | 0.589542516 | 0.001321864 |
| 0.437215272 | 0.010047246 | 0.029020579 |
| 0.320844279 | 0.076449735 | 0.012384633 |
| 0.019629359 | 0.080795403 | 0.57369142  |
| 0.011382635 | 0.010916941 | 0.683359086 |
| NA          | NA          | 0.037954093 |
| 0.078722616 | 0.597063839 | 0.009948035 |
| 0.777174695 | 0.521388127 | 0.038044046 |
| 0.078930359 | 0.041411877 | 0.523157419 |
| 0.025798026 | 0.86749228  | 0.200675986 |



|             |             |             |
|-------------|-------------|-------------|
| 0.994580088 | 0.592201338 | 0.002468279 |
| 0.210340327 | 0.698448719 | 6.46E-05    |
| 0.32711229  | 0.020949204 | 0.167855686 |
| 0.019964863 | 0.027909922 | 0.142865963 |
| 0.034728815 | 0.157166952 | 0.724573371 |
| 0.319436621 | 0.279842324 | 0.001187227 |
| 0.03416928  | 0.429271312 | 0.377141526 |
| 0.846767554 | 0.353055413 | 0.043106828 |
| 0.807603624 | 0.024965016 | 0.079714456 |
| 0.008973651 | 0.000101215 | 0.185423789 |
| 0.163194185 | 0.036473727 | 0.98195258  |
| 0.000762373 | 0.03540207  | 0.389940631 |
| 0.488823265 | 0.266176045 | 0.045006677 |
| 0.328064545 | 0.001302293 | 0.00137161  |
| 0.020617674 | 0.27818482  | 0.102886863 |
| 0.007233257 | 0.92215627  | 0.118916697 |
| 0.111067357 | 0.036480663 | 0.544493538 |
| 0.064304788 | 0.046353656 | 0.711715462 |
| 0.237488311 | 0.043889979 | 0.078018219 |
| 0.507138393 | 0.937460283 | 0.024911537 |
| 0.001222836 | 0.000544191 | 0.196267027 |
| 0.009868357 | 0.174598954 | 0.052912218 |
| 0.067920688 | 0.00020021  | 0.029418476 |
| 0.048695309 | 0.002176076 | 0.169135835 |
| 0.229697901 | 0.00832723  | 0.00832763  |
| 0.013203425 | 0.004898813 | 0.013810863 |
| 0.171643789 | 0.029401591 | 0.137961997 |
| 0.147832914 | 0.007216775 | 4.26E-05    |
| 0.002159007 | 0.177278329 | 0.526477712 |
| 0.427798976 | 0.027768185 | 0.197877655 |
| 0.458626549 | 0.321565245 | 0.002932975 |
| 0.42501018  | 0.072828192 | 0.0407356   |
| 0.037385267 | 0.161830684 | 0.126804699 |
| 0.173597071 | 0.031443507 | 0.026722768 |
| 0.024525048 | 0.028192278 | 0.962188338 |
| 0.138307739 | 0.009127428 | 0.003681537 |
| 0.127655577 | 0.032133217 | 0.179505913 |
| 0.054742513 | 0.020429342 | 0.382675351 |
| 0.075113146 | 0.047644042 | 0.028677568 |
| 0.552718519 | 0.000128803 | 6.00E-05    |
| 0.030028976 | 0.000637738 | 0.205031042 |
| 0.138948033 | 0.010550411 | 0.015508642 |
| 0.363442331 | 0.048339731 | 0.400905559 |
| 0.31235867  | 0.048695932 | 0.004621031 |
| 0.763898344 | 0.342015058 | 0.018478753 |
| 0.605927199 | 0.065934007 | 0.016357175 |
| 0.290394726 | 0.049509146 | 0.963266601 |

|             |             |             |
|-------------|-------------|-------------|
| 0.000839912 | 0.378863906 | 0.318707473 |
| 0.966501805 | 0.001914336 | 0.010193696 |
| 0.002231991 | 0.016936724 | 0.773247739 |
| 0.546362505 | 0.358501245 | 0.003811043 |
| 0.03445262  | 0.017439249 | 0.223401341 |
| 0.530867166 | 0.000196788 | 2.49E-05    |
| 0.032506266 | 0.056301693 | 0.017232531 |
| 0.763246858 | 0.332473707 | 0.049335788 |
| 0.212584635 | 0.29903628  | 0.008081343 |
| 0.051924788 | 0.139895361 | 0.029942319 |
| 0.365842274 | 0.866645113 | 0.040497132 |
| 0.223403566 | 0.797159259 | 0.009146947 |
| 0.005481444 | 0.054875226 | 0.130971367 |
| 0.019971701 | 0.764041291 | 0.009576845 |
| 0.216245778 | 0.377156019 | 0.000171338 |
| 0.976572695 | 0.143671172 | 0.001649599 |
| 0.253744826 | 0.264355985 | 0.004478863 |
| 0.556337544 | 0.045138964 | 0.024122159 |
| 0.030691144 | 0.133489349 | 0.148701768 |
| 0.712477918 | 0.148854567 | 0.00322633  |
| 0.026590566 | 0.040383426 | 0.47121548  |
| 0.320364517 | 0.040027127 | 0.343762806 |
| 0.186661342 | 0.067117868 | 0.006321827 |
| 0.977035656 | 0.318912447 | 0.035977331 |
| 0.237120928 | 0.036549783 | 0.16635931  |
| 0.628607032 | 0.061886597 | 0.00551982  |
| 0.011572542 | 0.965040036 | 0.038584227 |
| 0.604544845 | 0.260282871 | 0.033058013 |
| 0.794088502 | 0.012070945 | 0.138673386 |
| 0.161501901 | 0.755220274 | 0.017901881 |
| 0.79497907  | 0.045618659 | 0.122025834 |
| 0.0994221   | 0.000358637 | 0.00695154  |
| 0.010628941 | 0.003034534 | 0.06740528  |
| 0.010465298 | 0.685364638 | 0.000807612 |
| 0.106472682 | 0.034640608 | 0.203521605 |
| 0.773567931 | 0.191205207 | 0.017114732 |
| 0.10448981  | 0.019440047 | 0.34132543  |
| 0.032415152 | 0.524248207 | 0.765752459 |
| 0.428345575 | 0.628441359 | 0.022029763 |
| 0.206851015 | 0.000904843 | 0.008254036 |
| 0.396344217 | 0.091586369 | 0.037021354 |
| 0.815576545 | 0.006949062 | 3.87E-07    |
| 0.589252667 | 0.785959181 | 0.025509045 |
| 0.190738723 | 0.102469483 | 0.04960008  |
| 0.040236253 | 0.001666072 | 0.164205719 |
| 0.047439966 | 0.027527131 | 0.205396201 |
| 0.702317691 | 0.270621047 | 0.018379642 |

|             |             |             |
|-------------|-------------|-------------|
| 0.042911648 | 0.080604379 | 0.363173614 |
| 0.082275585 | 0.724032448 | 0.02682831  |
| 0.838974781 | 0.216434356 | 0.033448661 |
| 0.537770325 | 0.153863662 | 0.038260873 |
| 0.906097916 | 0.003925244 | 0.015144427 |
| 0.247529208 | 0.020801352 | 0.845271751 |
| 0.046842106 | 0.007011861 | 0.85644437  |
| 0.485382511 | 0.164508284 | 0.048837775 |
| 0.141598304 | 0.223921364 | 0.027074263 |
| 0.794567233 | 0.012084746 | 0.062654554 |
| 0.431312487 | 0.02913021  | 0.674480832 |
| 0.799832014 | 0.044757115 | 0.89267208  |
| 0.070662146 | 0.006903141 | 0.170600434 |
| 0.009237438 | 0.021384993 | 0.175808733 |
| 0.212681337 | 0.031459163 | 0.096979913 |
| 0.003627067 | 0.201284678 | 0.658271702 |
| 0.241256412 | 0.654201193 | 0.00483697  |
| 0.298368438 | 0.806099441 | 0.027102743 |
| 0.011052776 | 0.299630008 | 0.018311525 |
| 0.013032775 | 0.010215067 | 0.281892233 |
| 0.266014433 | 0.027993821 | 0.238716318 |
| 0.454486392 | 0.013464226 | 0.442071998 |
| 0.103205051 | 0.047575469 | 0.000190923 |
| 0.45929077  | 0.037494729 | 0.119711554 |
| 0.759661229 | 0.049635352 | 0.072016017 |
| 0.084415561 | 0.028257011 | 0.12625417  |
| 0.440355429 | 0.21049633  | 0.007462774 |
| 0.013639292 | 0.039974127 | 0.388860118 |
| 0.010498387 | 0.313025848 | 0.605897274 |
| 0.176485375 | 0.010082111 | 0.000803535 |
| 0.103082463 | 0.055520679 | 0.017048104 |
| 0.368136901 | 0.71416844  | 0.008232154 |
| 0.103589596 | 0.92125043  | 0.037498016 |
| 0.916263774 | 0.248384058 | 5.53E-08    |
| 0.068218698 | 0.03431644  | 0.794171105 |
| 0.219121673 | 0.055755272 | 0.01548747  |
| 0.142542773 | 0.29512717  | 0.034499424 |
| 0.030090423 | 0.426541383 | 0.679801014 |
| 0.714820913 | 0.047948966 | 0.114271809 |
| 0.917449494 | 0.080303733 | 0.007655803 |
| 0.035707048 | 0.594832916 | 0.363638325 |
| 0.385432114 | 0.07864803  | 0.0035499   |
| 0.047692948 | 0.11323322  | 0.811630266 |
| 2.30E-05    | 0.006247415 | 0.545587341 |
| 0.900742373 | 0.149777317 | 0.001406957 |
| 0.18628473  | 0.054440081 | 0.028143835 |
| 0.494929943 | 0.239047736 | 0.020370254 |

|             |             |             |
|-------------|-------------|-------------|
| 0.222710656 | 0.021994611 | 0.120382543 |
| 0.311359859 | 0.040645246 | 0.012022059 |
| 0.043747081 | 0.735062007 | 0.169871078 |
| 0.615997742 | 0.422601996 | 0.003595618 |
| 0.794453413 | 0.821535961 | 0.018689613 |
| 0.325291143 | 0.019298756 | 0.196416389 |
| 0.033764501 | 0.000203038 | 0.016386669 |
| 0.06100894  | 0.90616533  | 0.019340972 |
| 0.431660384 | 0.919836432 | 0.001897226 |
| 0.095607163 | 0.003163573 | 0.961309627 |
| 0.980203321 | 0.57862478  | 0.033450705 |
| 0.213025727 | 0.38751861  | 0.004737974 |
| 0.801288946 | 0.04469466  | 0.000882267 |
| 0.049234707 | 0.717561314 | 0.208102006 |
| 0.645896403 | 0.176714552 | 0.011252936 |
| 0.02931158  | 0.059748658 | 0.274469418 |
| 0.710752887 | 0.291379632 | 0.005445208 |
| 0.631871581 | 0.013464013 | 0.002919693 |
| 0.664216816 | 0.020336559 | 0.01452111  |
| 0.000528824 | 0.001030658 | 0.345201286 |
| 0.141770888 | 0.148577686 | 0.03719268  |
| 0.387606467 | 0.34537988  | 0.027513754 |
| 0.586669032 | 0.10961772  | 0.046522317 |
| 0.143605307 | 0.774434568 | 0.000561413 |
| 0.079476598 | 0.013909337 | 0.225426118 |
| 0.096624945 | 0.013008577 | 0.400636724 |
| 0.08114017  | 0.008852877 | 0.48160745  |
| 0.086589314 | 0.035839383 | 0.291421837 |
| 0.169957273 | 0.049100913 | 0.117233269 |
| 0.098232604 | 0.01973736  | 0.613449499 |
| 0.016874162 | 0.061974709 | 0.281372793 |
| 0.392916208 | 0.027079237 | 0.094656576 |
| 0.604145744 | 0.118493574 | 0.013845194 |
| 0.399989327 | 0.067599161 | 0.008145989 |
| 0.261742385 | 0.011807139 | 0.019120442 |
| 0.389899392 | 0.265990088 | 0.004283289 |
| 0.869091227 | 0.266753287 | 0.007346469 |
| 0.018391807 | 0.022992846 | 0.601190561 |
| 0.548152604 | 0.573044448 | 0.018490428 |
| 0.00366733  | 0.582612381 | 0.009437892 |
| 0.787468523 | 0.002039535 | 0.064892318 |
| 0.748729592 | 0.000101033 | 0.004759578 |
| 0.004070096 | 0.571794807 | 0.395585482 |
| 0.168656592 | 0.024270641 | 0.385808894 |
| 0.992304284 | 0.029506661 | 0.108168169 |
| 0.056870916 | 0.001868681 | 0.103308567 |
| 0.177173212 | 0.014322906 | 0.19915084  |

|             |             |             |
|-------------|-------------|-------------|
| 0.024833674 | 0.01459803  | 0.813391375 |
| 0.088964296 | 0.038355113 | 0.616784876 |
| 0.038338036 | 0.874983959 | 0.449643423 |
| 0.012899137 | 0.078402328 | 0.52296244  |
| 0.73730184  | 0.97001455  | 0.025553313 |
| 0.034644325 | 0.153306719 | 0.136014427 |
| 0.322687052 | 0.462276131 | 0.003626075 |
| 0.667828579 | 0.65587727  | 0.039238919 |
| 0.130264507 | 0.011822167 | 0.522622434 |
| 0.016394713 | 0.637905706 | 0.50920439  |
| 0.345743913 | 0.005351148 | 0.38565529  |
| 0.133059995 | 0.022139211 | 0.71644961  |
| 0.129896343 | 0.019076765 | 0.019380912 |
| 0.013503379 | 0.628319473 | 0.577777419 |
| 0.775591425 | 0.669479439 | 0.048640047 |
| 0.014559445 | 0.007250479 | 0.040850562 |
| 0.013553333 | 0.113681156 | 0.103680195 |
| 0.020723703 | 0.199042891 | 0.769395138 |
| 0.021399585 | 0.380790919 | 0.74711913  |
| 0.308792119 | 0.207335018 | 0.033937654 |
| 0.253802476 | 8.74E-05    | 0.000235321 |
| 0.651390916 | 0.001918918 | 0.000182215 |
| 0.487586225 | 0.007059616 | 0.07134641  |
| 0.508128116 | 0.895219658 | 0.0188842   |
| 0.288429759 | 0.48477519  | 0.036611639 |
| 0.026098566 | 0.016092414 | 0.852466958 |
| 0.834514756 | 0.236521881 | 0.040417187 |
| 0.589221306 | 0.049960331 | 0.097785066 |
| 0.760450178 | 0.047718112 | 0.671869776 |
| 0.021113648 | 0.229705321 | 0.207004893 |
| 0.120359426 | 0.005172477 | 0.046424757 |
| 0.300254876 | 0.205868463 | 0.021273752 |
| 0.2864887   | 0.041900138 | 0.249543182 |
| 0.011870013 | 0.480537252 | 0.029217802 |
| 0.549951443 | 0.635236566 | 0.025858059 |
| 0.007978023 | 0.96658675  | 0.146397197 |
| 0.011797792 | 0.082217348 | 0.153045616 |
| 0.042456283 | 0.055377324 | 0.366829722 |
| 0.04472646  | 0.933675786 | 0.029206193 |
| 0.170185557 | 0.626616714 | 0.040342222 |
| 0.333423777 | 0.009352967 | 0.000123355 |
| 0.037928314 | 0.004700311 | 0.112061289 |
| 0.268776746 | 0.060057902 | 0.007158088 |
| 0.145484611 | 0.938430591 | 0.02394121  |
| 0.116649991 | 0.812830216 | 0.009503988 |
| 0.0204159   | 0.00608432  | 0.125348737 |
| 0.823292714 | 0.64677963  | 0.044091922 |

|             |             |             |
|-------------|-------------|-------------|
| 0.667759029 | 0.962509    | 0.011872378 |
| 0.37655036  | 0.641383937 | 0.045581999 |
| 0.029807916 | 0.000949734 | 0.992804357 |
| 0.764640679 | 0.00753822  | 0.00373394  |
| 0.044326123 | 0.214399011 | 0.960235703 |
| 0.03950823  | 0.003238439 | 0.352453063 |
| 0.805123943 | 0.631547852 | 0.022203215 |
| 0.021595021 | 0.03326638  | 0.299407168 |
| 0.696847757 | 0.894530265 | 0.0313643   |
| 0.01824903  | 0.697892934 | 0.016287252 |
| 0.009557993 | 0.232853643 | 0.474354442 |
| 0.593079972 | 0.028888433 | 0.033955587 |
| 0.838840158 | 0.031364091 | 0.663137762 |
| 0.014369421 | 0.233246606 | 0.192881359 |
| 0.698395105 | 0.212793875 | 0.022545457 |
| 0.040434808 | 0.081023602 | 0.071831677 |
| 0.765781909 | 0.03079115  | 0.077233915 |
| 0.159129252 | 0.266956099 | 0.011591926 |
| 0.799973477 | 0.18340856  | 0.045488993 |
| 0.899357627 | 0.022150365 | 0.292563354 |
| 0.016929631 | 0.001709714 | 0.380996775 |
| 0.075681907 | 0.089286688 | 0.017005067 |
| 0.052664812 | 0.048560604 | 0.76270565  |
| 0.088964151 | 0.140138712 | 0.004291704 |
| 0.645792977 | 0.014302444 | 0.001748301 |
| 0.351488798 | 0.322231823 | 0.000124464 |
| 0.029601904 | 0.433609845 | 0.39240679  |
| 0.010758624 | 0.007421926 | 0.435250008 |
| 0.006850283 | 0.237011418 | 0.894510443 |
| 0.257721471 | 0.154940418 | 0.023316695 |
| 0.863582158 | 0.00049618  | 0.000770644 |
| 0.017667376 | 0.076248635 | 0.897245938 |
| 0.782757321 | 0.018613103 | 0.367502681 |
| 0.480660946 | 0.767462036 | 0.01817875  |
| 0.792165344 | 0.988615222 | 0.047106734 |
| 0.492231459 | 0.954616094 | 0.001006854 |
| 0.007743395 | 0.403296537 | 0.204778974 |
| 0.057234535 | 0.047081714 | 0.3845569   |
| 0.035902466 | 0.001844551 | 0.044015673 |
| 0.065207334 | 0.723020682 | 0.023324278 |
| 0.169948647 | 0.792771298 | 0.014399929 |
| 0.035984863 | 0.255926014 | 0.470559534 |
| 0.323745884 | 0.011773047 | 0.035760644 |
| 0.499504835 | 0.237340665 | 0.032492012 |
| 0.387100068 | 0.012220138 | 0.07777748  |
| 0.354462027 | 0.017706928 | 0.006460359 |
| 0.423487813 | 0.824004408 | 0.041781461 |

|             |             |             |
|-------------|-------------|-------------|
| 0.307813462 | 0.029639971 | 0.000537498 |
| 0.338013743 | 0.037223157 | 0.133682522 |
| 0.342126    | 0.341066381 | 0.043068051 |
| 0.021320699 | 0.337175729 | 0.456787018 |
| 0.002510824 | 0.025142853 | 0.786939748 |
| 0.01998678  | 0.554549509 | 0.72246938  |
| 0.024830929 | 0.412446995 | 0.513003043 |
| 0.199651285 | 0.0204871   | 0.114946477 |
| 0.475263128 | 0.343136144 | 0.008651705 |
| 0.978936159 | 0.003278604 | 0.000765997 |
| 0.349905276 | 0.446549595 | 0.029730759 |
| 0.844441444 | 0.039380654 | 0.003292645 |
| 0.209996761 | 0.232376178 | 0.000539693 |
| 0.61076417  | 0.095785054 | 0.0174839   |
| 0.415501424 | 0.492916289 | 0.019642596 |
| 0.578765742 | 0.472092454 | 0.0145031   |
| 0.119736357 | 0.156460417 | 8.33E-08    |
| 0.489992451 | 0.11760455  | 0.006487344 |
| 0.114009308 | 0.016123767 | 0.042900999 |
| 0.07394031  | 0.813730551 | 0.022431637 |
| 0.04128873  | 0.617387588 | 0.079232891 |
| 0.247601132 | 0.27079974  | 0.041771593 |
| 0.041250644 | 0.129624978 | 0.894380054 |
| 0.205322167 | 0.042950003 | 0.926045018 |
| 0.659180616 | 0.325289073 | 0.004003405 |
| 0.830190602 | 0.095697489 | 0.00220425  |
| 0.178549008 | 0.475365371 | 1.41E-05    |
| 0.059903747 | 0.02051073  | 0.2948497   |
| 0.028271008 | 0.120594983 | 0.71906525  |
| 0.014874769 | 0.010829007 | 0.792061166 |
| 0.126828799 | 0.033413524 | 0.972383725 |
| 0.041765369 | 0.835529228 | 0.000180562 |
| 0.2641296   | 0.341563844 | 0.045766025 |
| 0.939385878 | 0.087916983 | 0.004656037 |
| 0.205315553 | 0.733801396 | 0.04852149  |
| 0.515081229 | 0.014512883 | 0.000752616 |
| 0.199386145 | 0.000841269 | 0.017713936 |
| 0.000137863 | 0.000108424 | 0.288598333 |
| 0.170687493 | 0.769785914 | 0.043441074 |
| 0.30503609  | 0.924186445 | 0.019051797 |
| 0.011041139 | 0.17464281  | 0.12158317  |
| 0.387533999 | 0.845517646 | 0.007362501 |
| 0.038031949 | 0.544175711 | 0.844268084 |
| 0.037132304 | 0.132245136 | 0.615328404 |
| 0.058077489 | 0.012618739 | 0.798760694 |
| 0.497806537 | 0.048628975 | 0.117546013 |
| 0.545291635 | 0.673402967 | 0.001564988 |

|             |             |             |
|-------------|-------------|-------------|
| 0.778756182 | 0.389543375 | 0.044545541 |
| 0.004781211 | 0.151671503 | 0.293563594 |
| 0.03088465  | 0.28442897  | 0.26339077  |
| 0.023957276 | 0.332220035 | 0.884630285 |
| 0.064825865 | 0.030035699 | 0.921820861 |
| 0.146255844 | 0.014045218 | 0.059764157 |
| 0.060470879 | 0.044592282 | 0.223260777 |
| 0.001298496 | 0.011258968 | 0.362486567 |
| 0.106253019 | 0.006651355 | 0.24378347  |
| 0.319254481 | 0.016069544 | 0.034563391 |
| 0.882564576 | 0.092657163 | 0.001439346 |
| 0.571505738 | 0.019363851 | 0.165283203 |
| 0.090609567 | 0.000624437 | 0.00048363  |
| 0.225355453 | 0.004421277 | 0.017377015 |
| 0.399728961 | 0.196302733 | 0.019176174 |
| 0.031087841 | 0.015888573 | 0.69504985  |
| 0.008719939 | 0.193852641 | 0.671512406 |
| 0.542620358 | 0.012009345 | 0.019442211 |
| 0.949867466 | 0.031442884 | 0.000349843 |
| 0.10097405  | 0.805858414 | 0.00101974  |
| 0.440690177 | 0.764691249 | 0.031259053 |
| 0.910165819 | 0.040005259 | 0.008446803 |
| 0.4052249   | 0.15375975  | 0.000592293 |
| 0.598770678 | 0.097612028 | 0.025103609 |
| 0.867222596 | 0.712742795 | 0.047264761 |
| 0.189176785 | 0.887694141 | 0.016531609 |
| 0.227471332 | 0.767979736 | 0.002443489 |
| 0.330353397 | 0.642578969 | 0.030938042 |
| 0.647875252 | 0.189589642 | 0.007660286 |
| 0.940101258 | 0.024125923 | 0.013380451 |
| 0.804474675 | 0.038895321 | 0.012085665 |
| 0.414566319 | 0.000945709 | 0.135286574 |
| 0.541931809 | 0.108262829 | 0.001001938 |
| 0.137195182 | 0.274553962 | 0.026690838 |
| 0.042901338 | 0.065121907 | 0.589244338 |
| 0.490284975 | 0.036187434 | 0.172251205 |
| 0.106109448 | 0.89435572  | 0.004491371 |
| 0.048069013 | 0.652548308 | 0.64736285  |
| 0.631390506 | 0.320599227 | 0.048882379 |
| 0.021723902 | 0.443346092 | 0.185003735 |
| 0.242309132 | 0.719658505 | 0.010202775 |
| 0.019206587 | 0.341890615 | 0.200209306 |
| 0.146750338 | 0.642697238 | 2.71E-05    |
| 0.5144081   | 0.009608576 | 0.009082569 |
| 0.215786963 | 0.009500543 | 0.719903948 |
| 0.303351227 | 0.00973416  | 0.00608349  |
| 0.557144766 | 0.669503262 | 0.027560704 |



|             |             |             |
|-------------|-------------|-------------|
| 0.350523411 | 0.623613753 | 0.011166014 |
| 0.09408639  | 0.741353    | 0.011978711 |
| 0.97692251  | 0.617216384 | 0.026790146 |
| 0.732041184 | 0.02465245  | 0.045829091 |
| 0.766091741 | 0.479710531 | 0.003233866 |
| 0.387852526 | 0.391299455 | 0.010915855 |
| 0.115735301 | 0.01312059  | 0.021836127 |
| 0.034911038 | 0.24459571  | 0.21778007  |
| 9.32E-06    | 1.68E-06    | 0.056536951 |
| 0.647931199 | 0.798467608 | 0.028748003 |
| 0.214363707 | 0.426254057 | 0.023109453 |
| 0.770083914 | 0.646779476 | 0.011866523 |
| 0.58541894  | 0.025307959 | 0.606884948 |
| 0.809736648 | 0.753268051 | 0.007848976 |
| 0.075023985 | 0.387386852 | 0.048307432 |
| 0.710224533 | 0.002518709 | 0.003306157 |
| 0.391631127 | 0.351546634 | 2.71E-07    |
| 0.785970652 | 0.55075194  | 0.010496834 |
| 0.066041717 | 0.451537604 | 0.00100661  |
| 0.543270512 | 0.238127344 | 0.025983313 |
| 0.98631652  | 0.04933714  | 0.012954629 |
| 0.000668416 | 0.523929427 | 0.006043083 |
| 0.45649844  | 0.020497908 | 0.05975396  |
| 0.036207282 | 0.933187621 | 0.65857793  |
| 0.723587559 | 0.291925121 | 0.007465067 |
| 0.010058239 | 0.143305414 | 0.014779436 |
| 0.26133324  | 0.350841083 | 0.003889872 |
| 0.563885615 | 0.013280659 | 0.053385811 |
| 0.003521125 | 0.019066272 | 0.331909093 |
| 0.06893477  | 0.017821275 | 0.269163064 |
| 0.321332667 | 0.124928439 | 0.049364648 |
| 0.152237857 | 0.021717874 | 0.009094417 |
| 0.236063181 | 0.177076073 | 0.000863011 |
| 0.210320066 | 0.016155638 | 0.022273681 |
| 0.19547173  | 0.241892955 | 0.019911255 |
| 0.039772587 | 0.313146367 | 0.448050473 |
| 0.854139557 | 0.220846941 | 0.036264199 |
| 0.670041029 | 0.114030162 | 0.020781262 |
| 0.563276543 | 0.091914423 | 0.040352889 |
| 0.623016369 | 0.890058763 | 0.030945661 |
| 0.029056401 | 0.132548707 | 0.719197515 |
| 0.018245477 | 0.018873692 | 0.642849186 |
| 0.38574653  | 0.155487183 | 0.048845717 |
| 0.184560027 | 0.010353736 | 0.026896959 |
| 0.887480996 | 0.778489956 | 0.012133297 |
| 0.048979813 | 0.096181433 | 0.191956812 |
| 0.404994148 | 0.817823001 | 0.024457572 |

|             |             |             |
|-------------|-------------|-------------|
| 0.018442654 | 0.00188363  | 0.045506276 |
| 0.044824699 | 0.08913113  | 0.900388655 |
| 0.040793076 | 0.115711103 | 0.28070038  |
| 0.030431726 | 0.017699389 | 0.004896305 |
| 0.909877334 | 0.098188906 | 0.035750247 |
| 0.446189226 | 0.04556787  | 0.853313266 |
| 0.731539714 | 0.02280167  | 0.156928182 |
| 0.360229344 | 0.504378271 | 0.020280532 |
| 0.007515952 | 0.000609978 | 0.259390351 |
| 0.081717846 | 0.006523069 | 0.434663589 |
| 0.524637734 | 0.003077657 | 0.005202395 |
| 0.024549439 | 0.042345082 | 0.639274726 |
| 0.603632104 | 0.619000813 | 0.013486466 |
| 0.442267394 | 0.680714562 | 0.003962146 |
| 0.728683453 | 0.478094628 | 0.036240829 |
| 0.417431757 | 0.453175318 | 0.001820813 |
| 0.732780699 | 0.751310916 | 0.026825737 |
| 0.061457195 | 0.446189344 | 0.042974999 |
| 0.026919336 | 0.190807217 | 0.355057215 |
| 0.198792535 | 0.010544964 | 0.230935404 |
| 0.03911897  | 0.046433718 | 0.376233722 |
| 0.078830517 | 0.034529598 | 0.272720017 |
| 0.949903834 | 0.512860167 | 0.048327155 |
| 0.137308102 | 0.77426232  | 0.018675521 |
| 0.35073287  | 0.0461131   | 0.411460842 |
| 0.297936851 | 0.044214012 | 0.078387489 |
| 0.276958706 | 0.018286824 | 0.685658196 |
| 0.8877798   | 0.027174452 | 0.021216617 |
| 0.491144086 | 0.006293114 | 0.103993683 |
| 0.405273708 | 0.001536084 | 0.82156015  |
| 0.063938641 | 0.045161328 | 0.196630342 |
| 0.475421947 | 0.011618025 | 0.209655097 |
| 0.40872799  | 0.212105426 | 0.001604934 |
| 0.171958796 | 0.025137522 | 0.802406208 |
| 0.524852438 | 0.420065406 | 0.001426356 |
| 0.203084366 | 0.899445503 | 0.018324177 |
| 0.006944492 | 0.224510709 | 0.376440741 |
| 0.121003724 | 0.019399982 | 0.581519908 |
| 0.046122893 | 0.323483557 | 0.816018651 |
| 0.094210186 | 0.005697101 | 0.389814334 |
| 0.909368801 | 0.034524065 | 0.074255737 |
| 0.398190881 | 0.031619554 | 0.122063951 |
| 0.002080063 | 0.006720565 | 0.151277117 |
| 0.046050959 | 0.069691806 | 0.71336372  |
| 0.231014862 | 0.177432261 | 0.018760548 |
| 0.013866283 | 0.341766058 | 0.20006141  |
| 0.017097406 | 0.216995048 | 0.524107978 |

|             |             |             |
|-------------|-------------|-------------|
| 0.155235243 | 0.005537082 | 0.1274519   |
| 0.642626634 | 0.001058364 | 0.010404937 |
| 0.272068229 | 0.019828788 | 0.125386865 |
| 0.791867312 | 0.174501643 | 0.021418906 |
| 0.626776846 | 0.049901009 | 0.003512718 |
| 0.57581916  | 0.784384835 | 0.022760178 |
| 0.019268583 | 0.000391709 | 0.259714041 |
| 0.904760631 | 0.430564528 | 0.034552133 |
| 0.417305925 | 0.021911204 | 0.059580405 |
| 0.876423262 | 0.223090973 | 0.030712977 |
| 0.165533249 | 0.003747233 | 0.198355296 |
| 0.381896199 | 0.207252671 | 0.017042909 |
| 0.514605253 | 0.036065219 | 0.587288727 |
| 0.422348279 | 0.310723361 | 0.041143269 |
| 0.800869633 | 0.027813255 | 0.996350137 |
| 0.0005979   | 0.131776411 | 0.19314107  |
| 0.669731764 | 0.158226182 | 0.019101519 |
| 0.093747219 | 0.041891554 | 0.582653436 |
| 0.17227906  | 0.047376912 | 0.503095266 |
| 0.039682341 | 0.142739381 | 0.471677209 |
| 0.078593251 | 0.028423082 | 0.718538893 |
| 0.290628923 | 0.166783302 | 0.022534701 |
| 0.219628065 | 0.009184032 | 0.287944381 |
| 3.24E-05    | 0.002550651 | 0.323437799 |
| 0.238093293 | 0.367172317 | 0.001980084 |
| 0.040519067 | 0.531752364 | 0.50240394  |
| 0.146222463 | 0.774844418 | 0.010270134 |
| 0.036736478 | 0.440895759 | 0.719515909 |
| 0.372518787 | 0.519022045 | 0.003825264 |
| 0.032127321 | 0.551611714 | 0.606944033 |
| 0.023014255 | 0.052282061 | 0.410447562 |
| 0.049722671 | 0.055533369 | 0.15297791  |
| 0.397705661 | 0.533139406 | 0.023292817 |
| 0.46040728  | 0.068269811 | 0.022984556 |
| 0.348641613 | 0.852861934 | 0.027854166 |
| 0.633606879 | 0.939522169 | 0.011848948 |
| 0.128160842 | 0.589182588 | 0.008567348 |
| 0.019283919 | 0.024154728 | 0.570523017 |
| 0.475258323 | 0.044679786 | 0.908927488 |
| 0.03074178  | 0.505433619 | 0.032192655 |
| 0.003447215 | 0.001225142 | 0.123114209 |
| 0.011413581 | 0.18540733  | 0.036619281 |
| 0.006297566 | 0.193929029 | 0.952286254 |
| 0.000276904 | 0.010901181 | 0.255032083 |
| 0.043861828 | 0.415046477 | 0.005421402 |
| 0.103235519 | 0.108861992 | 0.022608565 |
| 0.226649557 | 0.118387854 | 0.001547667 |

|             |             |             |
|-------------|-------------|-------------|
| 0.052564002 | 0.808761941 | 0.023501399 |
| 0.006145199 | 0.270697917 | 0.000270914 |
| 0.019473972 | 0.869216362 | 0.001369032 |
| 0.030307102 | 0.169805592 | 0.003266043 |
| 0.03256072  | 0.132976519 | 0.123216237 |
| 0.310153131 | 0.081429899 | 0.00477233  |
| 0.00189916  | 0.941198018 | 0.000221766 |
| 0.761293713 | 0.172114826 | 0.040329822 |
| 0.784311909 | 0.000345345 | 0.000441939 |
| 0.304072268 | 0.045163039 | 0.201911905 |
| 0.110760353 | 0.067432367 | 2.95E-05    |
| 0.146993575 | 0.54038016  | 0.039802264 |
| 0.598417539 | 0.013676896 | 0.002014326 |
| 0.086652858 | 0.268045215 | 0.018030884 |
| 0.715651429 | 0.082799181 | 0.011341599 |
| 0.91590144  | 0.058330354 | 0.006527445 |
| 0.005858413 | 0.416511296 | 0.10179275  |
| 0.817556474 | 0.115217297 | 0.010903923 |
| 0.263860576 | 0.000887628 | 8.36E-07    |
| 0.520477486 | 0.04050713  | 0.012556195 |
| 0.004285471 | 0.106022952 | 0.000315739 |
| 0.00175984  | 0.31519825  | 0.059875401 |
| 0.083258285 | 0.039438991 | 0.000103773 |
| 0.012025752 | 0.232434785 | 0.000167868 |
| 0.466181377 | 0.921829233 | 0.033395463 |
| 0.120567498 | 0.574591642 | 0.015395313 |
| 0.668788903 | 0.441359492 | 0.029230493 |
| 0.794739175 | 0.532065428 | 0.005005928 |
| 0.017463432 | 0.222873691 | 0.005966727 |
| 0.074434094 | 0.139388104 | 0.022599659 |
| 0.032059873 | 0.129369631 | 0.001309078 |
| 0.017525694 | 0.344001157 | 7.00E-06    |
| 0.047736256 | 0.849121745 | 0.023679545 |
| 0.002825395 | 0.308628033 | 0.08311733  |
| 0.048497084 | 0.185418636 | 0.001398527 |
| 0.040843822 | 0.767922864 | 0.055835921 |
| 0.017921204 | 0.187275154 | 0.000542831 |
| 0.055552642 | 0.111822711 | 8.41E-05    |
| 0.030292375 | 0.130276311 | 0.623105426 |
| 0.172381704 | 0.264818163 | 0.012490319 |
| 0.044659425 | 0.670487662 | 0.202980426 |
| 0.60298107  | 0.034673781 | 0.012788211 |
| 0.119662469 | 0.568863521 | 0.003420079 |
| 0.862660486 | 0.243253875 | 0.004504963 |
| 0.079500697 | 0.181101953 | 0.003346039 |
| 0.359964551 | 0.04794787  | 0.000116244 |
| 0.249864019 | 0.212454648 | 0.001971058 |

|             |             |             |
|-------------|-------------|-------------|
| 0.271407123 | 0.012696767 | 0.003450377 |
| 0.056966232 | 0.015616807 | 0.39007208  |
| 0.077206955 | 0.013952178 | 0.534822582 |
| 0.066538828 | 0.632472042 | 0.04494151  |
| 0.869761748 | 0.025936902 | 0.166750574 |
| 0.024098078 | 0.517425539 | 0.128104266 |
| 0.948294762 | 0.375163301 | 0.043872141 |
| 0.078990788 | 0.977288489 | 0.015651781 |
| 0.039823538 | 0.18425188  | 0.24424779  |
| 0.005471632 | 0.000752133 | 0.414440993 |
| 0.301122561 | 0.01899944  | 0.169579314 |
| 0.928518477 | 0.608441588 | 0.048465892 |
| 0.03847316  | 0.687040895 | 0.030018808 |
| 0.009852693 | 0.482059757 | 0.584613119 |
| 0.405659797 | 0.442667609 | 0.026729497 |
| 0.039640645 | 0.000205509 | 0.233534075 |
| 0.086853448 | 0.017860773 | 0.19097012  |
| 0.386205391 | 0.003729167 | 0.153164856 |
| 0.078370965 | 0.12336482  | 0.024936724 |
| 0.041808423 | 0.658333609 | 0.417464996 |
| 0.928022156 | 0.154358946 | 0.002755127 |
| 0.934305651 | 0.00592504  | 0.038575529 |
| 0.829495463 | 0.026231762 | 0.008533965 |
| 0.043599657 | 0.175933402 | 0.309812719 |
| 0.237654512 | 0.177342515 | 0.021184108 |
| 0.029293543 | 0.689217653 | 0.009240765 |
| 0.088686174 | 0.001701217 | 0.810501908 |
| 0.143238368 | 0.006120408 | 0.199944458 |
| 0.382018794 | 0.160170372 | 0.008543051 |
| 0.223163034 | 0.956603137 | 0.016689802 |
| 0.098313139 | 0.0262651   | 0.348118157 |
| 0.032097599 | 0.324403396 | 0.831259989 |
| 0.163699986 | 0.005129462 | 0.015382709 |
| 0.579929993 | 0.598935214 | 0.037335475 |
| 0.010331673 | 0.1063579   | 0.329118933 |
| 0.833697429 | 0.083502979 | 0.002716117 |
| 0.02832159  | 0.338196658 | 0.008499695 |
| 0.004232644 | 0.019447047 | 0.500439191 |
| 0.472133411 | 0.917230195 | 0.025755614 |
|             | 0.71795133  | 0.041469916 |
| 0.047328021 | 0.065251474 | 0.97434257  |
| 0.17635794  | 0.036078323 | 0.48620526  |
| 0.225303044 | 0.043364312 | 0.66312315  |
| 0.022988599 | 0.107122371 | 1.09E-06    |
| 0.005753773 | 0.000476878 | 0.910877964 |
| 0.220691534 | 0.412493219 | 0.003800643 |
| 0.754042762 | 0.004848495 | 0.016981454 |

NA

|             |             |             |
|-------------|-------------|-------------|
| 0.561524836 | 0.363029257 | 0.007712465 |
| 0.004951385 | 0.032823216 | 0.409740952 |
| 0.04111019  | 0.381850957 | 0.160695361 |
| 0.037424221 | 0.218709887 | 0.458276803 |
| 0.837118904 | 0.059504333 | 0.000297379 |
| 0.550941015 | 0.258964927 | 0.017364192 |
| 0.392256511 | 0.657290593 | 0.035491969 |
| 0.481294263 | 0.380748413 | 0.008970188 |
| 0.047413417 | 0.493599222 | 0.459123449 |
| 0.008148042 | 0.061522631 | 0.007694142 |
| 0.699157517 | 0.503859075 | 0.006283209 |
| 0.788035279 | 0.045226438 | 0.109935439 |
| 0.141075202 | 0.013006684 | 0.120745177 |
| 0.39299387  | 0.006810995 | 0.449592451 |
| 0.772034367 | 0.026823347 | 0.22339162  |
| 0.56462668  | 0.368743143 | 0.025582322 |
| 0.042718079 | 0.037966964 | 0.052563328 |
| 0.343033208 | 0.011612559 | 0.189785298 |
| 0.924599509 | 0.005336358 | 0.022834724 |
| 0.284550344 | 0.648095346 | 0.007874228 |
| 0.555618547 | 0.014728581 | 0.000347235 |
| 0.600533322 | 0.04918363  | 0.029130676 |
| 0.05826712  | 0.002878918 | 0.0002518   |
| 0.948695562 | 0.307038893 | 0.021156714 |
| 0.002280646 | 0.364879856 | 0.06271879  |
| 0.107567854 | 0.045272347 | 0.312536771 |
| 0.012014278 | 0.859367055 | 0.094226388 |
| 0.611158609 | 0.026849194 | 0.000127423 |
| 0.525579724 | 0.823537627 | 0.020358438 |
| 0.126430488 | 0.016473924 | 0.698013082 |
| 0.021975344 | 0.029441573 | 0.279417847 |
| 0.024094811 | 0.011514906 | 0.522541004 |
| 0.865788465 | 0.107839381 | 0.023001485 |
| 0.027915062 | 0.436314183 | 0.219517242 |
| 0.90355512  | 0.436153156 | 0.048186397 |
| 0.896171731 | 0.001128938 | 9.56E-06    |
| 0.170483958 | 3.99E-06    | 0.388811399 |
| 0.75312419  | 0.292495667 | 0.000899651 |
| 0.016110521 | 0.633700568 | 0.071150257 |
| 0.601443058 | 0.921365032 | 0.005947472 |
| 0.078240954 | 0.035517628 | 0.019114858 |
| 0.465018284 | 0.043246602 | 0.185685659 |
| 0.714466505 | 0.629118121 | 0.031435202 |
| 0.19945102  | 0.831525126 | 1.72E-05    |
| 0.040341507 | 0.522298242 | 0.404404392 |
| 0.021141348 | 0.498052196 | 0.16292099  |
| 0.046191632 | 0.718802362 | 0.033757809 |

|             |             |             |
|-------------|-------------|-------------|
| 0.001880627 | 0.077177149 | 0.699629932 |
| 0.671056356 | 0.015528599 | 0.00050506  |
| 0.480284558 | 0.015433232 | 0.655480731 |
| 0.031688535 | 0.319795255 | 0.459424619 |
| 0.048563869 | 0.500733173 | 0.002969099 |
| 0.355410694 | 0.706635652 | 0.013580015 |
| 0.701768169 | 0.148059466 | 0.012425509 |
| 0.036663412 | 0.243177505 | 0.341111036 |
| 0.038915364 | 0.287335887 | 0.250991069 |
| 0.460446763 | 0.356518677 | 0.021674768 |
| 0.346634374 | 0.303999209 | 0.046217566 |
| 0.045345187 | 0.25474336  | 0.59178203  |
| 0.023082927 | 0.143120488 | 0.722988383 |
| 0.046205533 | 0.152103835 | 0.64842334  |
| 0.084736712 | 0.031917505 | 0.315914717 |
| 0.312279501 | 0.011892971 | 0.035534741 |
| 0.019823435 | 0.000439902 | 0.06321321  |
| 0.416766447 | 0.258584593 | 0.023322841 |
| 0.170777402 | 0.009979507 | 0.714283914 |
| 0.474342834 | 0.046311916 | 0.168248049 |
| 0.005834227 | 0.277845397 | 0.637915723 |
| 0.178662024 | 0.043687729 | 0.198868779 |
| 0.420084664 | 0.031364683 | 0.4520748   |
| 0.904259843 | 0.023941147 | 0.057009989 |
| 0.281602984 | 0.041240164 | 0.150155994 |
| 0.344856671 | 0.002394984 | 5.18E-06    |
| 0.033524338 | 0.163741717 | 0.796955863 |
| 0.482601074 | 0.142757568 | 0.031436404 |
| 0.012805838 | 0.013633125 | 0.676373333 |
| 0.463878611 | 0.329542705 | 0.01877062  |
| 0.991312249 | 0.247817823 | 0.029136958 |
| 0.089245458 | 0.019160352 | 0.002938841 |
| 0.650547076 | 0.219176929 | 0.03009125  |
| 0.00318747  | 0.01045701  | 0.255097863 |
| 0.678274328 | 0.214991292 | 0.001858932 |
| 0.999729626 | 0.013529992 | 0.139134639 |
| 0.013404405 | 0.733290782 | 0.574515328 |
| 0.017432169 | 0.762053874 | 0.079060938 |
| 0.029429833 | 0.726524841 | 0.731299717 |
| 0.557269062 | 0.921546089 | 0.025892502 |
| 0.896582788 | 0.028985264 | 0.055634011 |
| 0.514284894 | 0.080790993 | 0.023774383 |
| 0.043655947 | 0.12020899  | 0.080468729 |
| 0.793448967 | 0.773796049 | 0.043652822 |
| 0.036346511 | 0.808107285 | 0.042226392 |
| 0.423507737 | 0.009601489 | 0.515399084 |
| 0.034607961 | 0.012722498 | 0.158620504 |

|             |             |             |
|-------------|-------------|-------------|
| 0.486885818 | 0.290306576 | 0.047850319 |
| 0.486928768 | 0.042241919 | 0.29434792  |
| 0.459057978 | 0.009065164 | 0.008944358 |
| 0.888392474 | 0.208391232 | 0.009716158 |
| 0.626255251 | 0.006344356 | 0.110275236 |
| 0.378863634 | 0.411766187 | 0.023183305 |
| 0.036450718 | 0.020631592 | 0.808478112 |
| 0.549876982 | 0.743837036 | 0.034507259 |
| 0.109552779 | 0.025869383 | 0.227089218 |
| 0.120003266 | 0.491749317 | 0.028452559 |
| 0.772200489 | 0.759298066 | 0.044868314 |
| 0.514764236 | 0.536470524 | 0.01089421  |
| 0.904099547 | 0.089776023 | 0.049015081 |
| 0.033433272 | 0.030418153 | 0.378714275 |
| 0.705226747 | 0.017888816 | 0.032052488 |
| 0.165697085 | 0.463925129 | 0.027886036 |
| 0.018042369 | 0.000151777 | 0.158142476 |
| 0.984473797 | 0.359948602 | 0.001415302 |
| 0.361956619 | 0.016829424 | 0.507906033 |
| 0.955353563 | 0.086209496 | 0.032441222 |
| 0.0005594   | 0.201613709 | 0.569977371 |
| 0.121637313 | 0.010346093 | 0.087322133 |
| 0.309045898 | 0.992426715 | 0.00759105  |
| 0.946937713 | 0.501638067 | 0.034493196 |
| 0.008956595 | 0.000166307 | 0.548572723 |
| 0.025185178 | 0.020702563 | 0.277987233 |
| 0.058375776 | 0.006730304 | 0.631066567 |
| 0.040104005 | 0.226019558 | 0.379911659 |
| 0.904428061 | 0.091250578 | 0.000560196 |
| 0.105897928 | 0.035412582 | 0.997269932 |
| 0.667005665 | 0.406423233 | 0.00638761  |
| 0.789192191 | 0.550761918 | 0.038434609 |
| 0.698399244 | 0.085960284 | 0.002395071 |
| 0.099617735 | 0.062309511 | 0.023004885 |
| 0.658450243 | 0.046386216 | 0.001763085 |
| 0.173338948 | 9.07E-05    | 3.12E-06    |
| 0.492308097 | 0.287218835 | 0.024661516 |
| 0.033513636 | 0.719554428 | 0.182444417 |
| 0.654105605 | 0.242513977 | 0.004808974 |
| 0.674448668 | 0.052883847 | 0.004780312 |
| 0.748793399 | 0.648211582 | 0.021410173 |
| 0.692758081 | 0.171666185 | 0.049061042 |
| 0.864322848 | 0.276348064 | 0.007580943 |
| 0.005824897 | 0.034143339 | 0.488693664 |
| 0.344771947 | 0.598458622 | 0.002633716 |
| 0.233170798 | 0.013691191 | 0.089679565 |
| 0.064679429 | 0.00608332  | 0.416479618 |



|             |             |             |
|-------------|-------------|-------------|
| 0.620363123 | 0.896219737 | 0.028310945 |
| 0.931209675 | 0.412930208 | 0.049263045 |
| 0.046045843 | 0.043984463 | 0.780895765 |
| 0.686665463 | 0.166393461 | 0.027367458 |
| 0.064998278 | 0.305128941 | 0.04304604  |
| 0.522607436 | 0.344569537 | 0.036955541 |
| 0.469020675 | 0.469220536 | 0.000209455 |
| 1.69E-07    | 2.60E-05    | 0.146865763 |
| 0.003256258 | 0.028660885 | 0.001359288 |
| 0.627147931 | 0.968940756 | 0.012648337 |
| 0.018403816 | 0.116463948 | 0.798843227 |
| 0.552341888 | 0.337913026 | 0.014319232 |
| 0.36998702  | 0.55949893  | 0.00078147  |
| 0.753410966 | 0.276349332 | 0.034494374 |
| 0.008158962 | 0.040482713 | 0.860930614 |
| 0.030110443 | 0.362953782 | 0.600742086 |
| 0.007388177 | 0.544835266 | 0.059335571 |
| 0.800055495 | 0.034353119 | 0.021069915 |
| 0.593416071 | 0.037363402 | 0.110400227 |
| 0.269899754 | 0.641470848 | 0.009594513 |
| 0.031029653 | 0.217610755 | 0.675400329 |
| 0.032654838 | 0.36821797  | 0.676749607 |
| 0.675837451 | 0.025826196 | 0.048665937 |
| 0.025002245 | 0.359497812 | 0.301332833 |
| 0.014459336 | 0.260499933 | 0.496230117 |
| 0.83176129  | 0.980625821 | 0.034839235 |
| 0.334670161 | 0.921880308 | 0.022926602 |
| 0.551626749 | 0.211633347 | 0.018326869 |
| 0.579358727 | 0.827580126 | 0.004293837 |
| 0.304926416 | 0.234655603 | 2.30E-07    |
| 0.139966668 | 0.012019484 | 0.046077941 |
| 0.043956398 | 0.001506963 | 0.000707455 |
| 0.096728519 | 0.000110121 | 0.003298869 |
| 0.789306476 | 0.747028336 | 0.036246425 |
| 0.003206631 | 0.010972007 | 0.367112267 |
| 0.190507473 | 0.020685406 | 0.001158177 |
| 0.527764165 | 0.041720797 | 0.298823094 |
| 0.713490201 | 0.519343696 | 0.010575269 |
| 0.305414513 | 0.7071622   | 0.014584103 |
| 0.444627277 | 0.682279482 | 0.018827803 |
| 0.939104088 | 0.229157668 | 0.003936868 |
| 0.417473581 | 0.040031678 | 0.906369951 |
| 0.054115171 | 0.036580571 | 0.549657649 |
| 0.004420673 | 0.004478659 | 0.105809582 |
| 0.168397329 | 0.703488927 | 0.023557895 |
| 0.961845718 | 0.870984564 | 0.003785505 |
| 0.014883224 | 0.119801981 | 0.684693603 |

|             |             |             |
|-------------|-------------|-------------|
| 0.342217768 | 0.038862123 | 0.789417804 |
| 0.595744421 | 0.83766895  | 0.048216164 |
| 0.936072688 | 0.170725205 | 0.047334247 |
| 0.329149612 | 0.056423192 | 0.010099411 |
| 0.879966015 | 0.040623795 | 0.015525753 |
| 0.030064142 | 0.100768578 | 0.622238916 |
| 0.816207406 | 0.011611148 | 0.000217113 |
| 0.209016315 | 0.046694469 | 0.484565889 |
| 0.031856691 | 0.030176128 | 0.739229213 |
| 0.077573332 | 0.004365657 | 0.1487665   |
| 0.180412424 | 0.352367849 | 0.042281849 |
| 0.243748002 | 0.007968145 | 0.090696128 |
| 0.015432757 | 0.06535331  | 0.394623517 |
| 0.049777747 | 0.018171938 | 0.318356833 |
| 0.398340907 | 0.058892008 | 6.43E-05    |
| 0.916241154 | 0.093711203 | 0.016828965 |
| 0.034808078 | 0.004637911 | 0.189497642 |
| 0.043202729 | 0.900023046 | 0.056135132 |
| 0.229241636 | 0.265418319 | 0.002289104 |
| 0.603058461 | 0.117475    | 0.046885738 |
| 0.820876011 | 0.034472441 | 0.016082723 |
| 0.224871723 | 0.16290738  | 0.001749932 |
| 0.479643043 | 0.020645139 | 0.002919728 |
| 0.023940494 | 0.270400725 | 0.059681975 |
| 0.020664911 | 0.0341187   | 0.219486251 |
| 0.793289978 | 0.211510124 | 0.000120904 |
| 0.652950671 | 0.284407458 | 0.000865145 |
| 0.021996421 | 0.756367741 | 0.0804394   |
| 0.003796884 | 0.17129704  | 0.899304416 |
| 0.530668188 | 0.056352128 | 0.012465853 |
| 0.140994896 | 0.02766595  | 0.271637099 |
| 0.328561758 | 0.071476181 | 0.030183454 |
| 0.780985649 | 0.179635276 | 0.003792183 |
| 0.629957105 | 0.680099733 | 0.038435859 |
| 0.727509629 | 0.10251865  | 0.03990174  |
| 0.831682426 | 0.276160435 | 0.037856457 |
| 0.942434729 | 0.002377164 | 0.46005708  |
| 0.408838381 | 0.029930612 | 0.072615709 |
| 0.597126427 | 0.140013793 | 0.013373857 |
| 0.04326448  | 0.278600388 | 0.005178439 |
| 0.041012721 | 0.315915191 | 0.354329531 |
| 0.28348642  | 0.028789427 | 0.608879089 |
| 0.200284605 | 0.026734816 | 0.019738125 |
| 0.613998823 | 0.218140725 | 0.0203342   |
| 0.429636709 | 0.66516187  | 0.008914991 |
| 0.528798516 | 0.024915971 | 0.031601897 |
| 0.928389605 | 0.048024954 | 0.00846456  |

|             |             |             |
|-------------|-------------|-------------|
| 0.009502058 | 0.085526719 | 0.186048209 |
| 0.635559448 | 0.532184834 | 0.030398411 |
| 0.592182116 | 0.079673719 | 0.006131903 |
| 0.548221442 | 0.007274677 | 0.160755066 |
| 0.360962723 | 0.930411116 | 0.043894204 |
| 0.176312971 | 0.03833647  | 0.072431372 |
| 0.017345497 | 0.466140563 | 0.32906228  |
| 0.008243362 | 0.354270487 | 0.278827053 |
| 0.185009109 | 0.009819583 | 0.022817312 |
| 0.600673973 | 0.039828985 | 0.008803494 |
| 0.567186253 | 0.042811906 | 0.001222998 |
| 0.321877104 | 0.045827256 | 0.021658947 |
| 0.026772505 | 0.02678687  | 0.4963148   |
| 0.458990543 | 0.728736535 | 0.046865324 |
| 0.489028916 | 0.080357317 | 0.017703486 |
| 0.558290666 | 0.178707288 | 0.041561383 |
| 0.033998689 | 0.287049065 | 0.083231207 |
| 0.829901386 | 0.011836422 | 0.093605075 |
| 0.366302523 | 0.019438414 | 0.069585017 |
| 0.79296192  | 0.39126815  | 0.011203762 |
| 0.525942649 | 0.308176802 | 0.017994712 |
| 0.897125697 | 0.01656041  | 0.001171474 |
| 0.642116025 | 0.704274362 | 2.05E-05    |
| 0.04970944  | 0.663167824 | 0.282030503 |
| 0.553982193 | 0.545337377 | 0.045834187 |
| 0.845966458 | 0.170080065 | 0.008665642 |
| 0.079066027 | 0.025296761 | 0.956435939 |
| 0.214137277 | 0.032401584 | 0.410720427 |
| 0.501810086 | 0.006544311 | 0.000454284 |
| 0.000218153 | 0.22847169  | 0.133413321 |
| 0.488781755 | 0.152996203 | 0.046124205 |
| 0.005247867 | 0.267419179 | 0.198124892 |
| 0.044437426 | 0.785016749 | 0.005504961 |
| 0.048412871 | 0.010799474 | 0.031200505 |
| 0.039237432 | 0.012737677 | 0.214036993 |
| 0.070225213 | 0.025330426 | 0.325356496 |
| 0.686741314 | 0.040906068 | 0.952699757 |
| 0.337667688 | 0.046843606 | 0.260890365 |
| 0.02870037  | 0.345805536 | 0.001227402 |
| 0.00995761  | 0.000804642 | 0.688860394 |
| 0.071970141 | 0.028609273 | 0.354748607 |
| 0.22351408  | 0.005161621 | 0.24881108  |
| 0.019388165 | 0.145710939 | 0.111150822 |
| 0.923845835 | 0.018764988 | 0.026930852 |
| 0.098238517 | 0.000602803 | 0.020563878 |
| 0.885733455 | 0.192816387 | 0.000555867 |
| 0.029491002 | 0.158981609 | 0.171287976 |

|             |             |             |
|-------------|-------------|-------------|
| 0.873329486 | 0.05503856  | 0.046214824 |
| 0.0365903   | 0.004639882 | 0.047034298 |
| 0.912739719 | 0.301124375 | 0.031242402 |
| 0.809465351 | 0.968973427 | 0.020375631 |
| 0.467285248 | 0.556531473 | 0.017998854 |
| 0.660266842 | 0.498439828 | 0.002780589 |
| 0.060388799 | 0.034170113 | 0.225404987 |
| 0.305509632 | 0.033737054 | 0.256637858 |
| 0.158096897 | 0.921471262 | 0.012497494 |
| 0.039113383 | 0.809792653 | 0.00028812  |
| 0.93194152  | 0.049077864 | 0.447249312 |
| 0.039491074 | 0.047524501 | 0.815905448 |
| 0.021756296 | 0.557205535 | 0.037408331 |
| 0.011767358 | 0.677436147 | 0.040373424 |
| 0.115245687 | 0.538174155 | 0.026185997 |
| 0.18877256  | 0.009782071 | 0.402770833 |
| 0.023717861 | 0.263736712 | 0.687053363 |
| 0.642406763 | 0.822285164 | 0.003871288 |
| 0.988856467 | 0.001462063 | 4.79E-07    |
| 0.061421634 | 0.038394245 | 0.236423261 |
| 0.748567826 | 0.051493264 | 0.002074751 |
| 0.145596549 | 0.561085043 | 0.014819307 |
| 0.031260031 | 0.008183973 | 0.463461512 |
| 0.688298837 | 0.032369393 | 0.990731976 |
| 0.424795545 | 0.04137361  | 0.382219931 |
| 0.227858477 | 0.360443615 | 0.012755665 |
| 0.264328768 | 0.859789263 | 0.041096672 |
| 0.001326059 | 0.050291791 | 0.171847579 |
| 0.040527367 | 0.882546693 | 0.092843206 |
| 0.850851608 | 0.470900128 | 0.012279446 |
| 0.125629511 | 0.038219126 | 0.520485092 |
| 0.230478752 | 0.070767684 | 2.01E-06    |
| 0.007145688 | 0.002596868 | 0.059879174 |
| 0.709886675 | 0.163533017 | 0.00551208  |
| 0.434082252 | 0.033233273 | 0.514387627 |
| 0.008010565 | 0.012018238 | 0.2949166   |
| 0.035380287 | 0.930855349 | 0.817245667 |
| 0.656250263 | 0.643686934 | 0.019227771 |
| 0.173136012 | 0.460298642 | 4.92E-06    |
| 0.814759624 | 0.548471524 | 0.012854209 |
| 0.008372183 | 0.022009641 | 0.72188885  |
| 0.613400092 | 0.762690257 | 0.046465218 |
| 0.030583166 | 0.007662361 | 0.077035639 |
| 0.328842551 | 0.808379762 | 0.039945712 |
| 0.830813787 | 0.888471695 | 0.002505244 |
| 0.955791041 | 0.615316197 | 0.046004857 |
| 0.998564394 | 0.195888159 | 0.004759943 |

|             |             |              |
|-------------|-------------|--------------|
| 0.913988059 | 0.068850489 | 0.035457805  |
| 0.673304914 | 0.277523678 | 0.000573187  |
| 0.031224067 | 0.85142902  | 0.337347037  |
| 0.214413264 | 0.039911436 | 0.437120397  |
| 0.163374409 | 0.826986288 | 0.033542349  |
| 0.140810182 | 0.669293583 | 0.007371686  |
| 0.029733935 | 0.000518984 | 0.469317679  |
| 0.02600026  | 0.000903422 | 0.123911118  |
| 0.097631067 | 0.002025407 | 0.003359883  |
| 0.030573196 | 0.090051782 | 0.168214233  |
| 0.018858154 | 0.59820639  | 0.632686941  |
| 0.11036703  | 0.020348723 | 0.484452803  |
| 0.35426906  | 0.050198236 | 0.019760087  |
| 0.697970858 | 0.156809157 | 5.54E-05     |
| 0.654971563 | 0.284784603 | 0.031324611  |
| 0.979117841 | 0.721913816 | 0.001498737  |
| 0.435476351 | 0.040325718 | 0.249435628  |
| 0.02698361  | 0.391368992 | 0.0144449718 |
| 0.044531833 | 0.432223089 | 0.155523433  |
| 0.007729739 | 0.118085524 | 0.349263517  |
| 0.473388315 | 0.013313474 | 0.092385839  |
| 0.542076344 | 0.801646791 | 0.000200459  |
| 0.761970719 | 0.173001212 | 0.0174243    |
| 0.720015389 | 0.148493553 | 0.026513486  |
| 0.789712196 | 0.166718186 | 0.019652276  |
| 0.007402377 | 0.004003175 | 0.197027993  |
| 0.046550517 | 0.123422268 | 0.102751245  |
| 0.019003481 | 0.958436801 | 0.055348437  |
| 0.246385966 | 0.017012821 | 0.044235469  |
| 0.01745876  | 0.372614345 | 0.478904703  |
| 0.427484255 | 0.338445821 | 0.009224492  |
| 0.58781382  | 0.019017489 | 0.241644152  |
| 0.029215797 | 0.016000044 | 0.014083467  |
| 0.034079129 | 0.555795842 | 0.284214373  |
| 0.70425146  | 0.873153955 | 0.024941197  |
| 0.359407945 | 0.126971522 | 0.000745277  |
| 0.622680536 | 0.007662247 | 0.003125658  |
| 0.20262777  | 0.000555426 | 0.01610856   |
| 0.676974507 | 0.651660097 | 0.000253396  |
| 0.25013164  | 0.226591449 | 0.02306023   |
| 0.116461233 | 0.029897797 | 0.637757152  |
| 0.442715429 | 0.329074165 | 0.04691843   |
| 0.020126797 | 0.002112772 | 0.030459462  |
| 0.75637087  | 0.038599867 | 0.481032524  |
| 0.455125572 | 0.748300159 | 0.049099679  |
| 0.011867062 | 0.014471756 | 0.74727499   |
| 0.159368456 | 0.009924189 | 0.003530364  |

|             |             |             |
|-------------|-------------|-------------|
| 0.960168015 | 0.046432019 | 0.062500554 |
| 0.160628879 | 0.006183003 | 0.003502983 |
| 0.500580493 | 0.055547523 | 0.04591816  |
| 0.202731564 | 0.639986253 | 0.028599054 |
| 5.96E-05    | 0.001642213 | 0.000285284 |
| 0.02533972  | 0.066911101 | 0.547919938 |
| 0.765781909 | 0.797123751 | 0.00420267  |
| 0.041031144 | 0.06534973  | 0.447311737 |
| 0.799910785 | 0.52582107  | 0.049452916 |
| 0.487978858 | 0.574129664 | 0.025995533 |
| 0.821198206 | 0.048550228 | 0.403498406 |
| 0.890057924 | 0.079236489 | 0.009578331 |
| 0.048837417 | 0.194093309 | 0.60474815  |
| 0.384888118 | 0.043107939 | 0.141598809 |
| 0.504377937 | 0.03122982  | 0.002570487 |
| 0.003271613 | 0.009070346 | 0.060396312 |
| 0.550794422 | 0.510721271 | 0.00803509  |
| 0.262605722 | 0.008885552 | 0.04177205  |
| 0.186095438 | 0.343464011 | 0.006622411 |
| 0.42991072  | 0.101039721 | 0.008264295 |
| 0.375753786 | 0.488850015 | 0.044852568 |
| 0.830411437 | 0.044158003 | 0.050569752 |
| 0.064960717 | 0.615000318 | 0.007950629 |
| 0.840420737 | 0.737241142 | 0.000706864 |
| 0.107372119 | 0.026072623 | 0.384746467 |
| 0.003034375 | 0.061847115 | 0.295470669 |
| 0.736486443 | 0.019992729 | 0.009061072 |
| 0.644881444 | 0.663023136 | 0.00125977  |
| 0.983746844 | 0.325293782 | 0.020957099 |
| 0.087661559 | 0.000195545 | 0.003966113 |
| 0.009377449 | 0.004074417 | 0.084936965 |
| 0.118322438 | 0.018034512 | 0.283046534 |
| 0.791357435 | 0.012338876 | 0.017699907 |
| 0.51935156  | 0.45250592  | 0.036007994 |
| 0.547703224 | 0.071278264 | 0.020984676 |
| 0.321933817 | 0.001520111 | 0.124320611 |
| 0.389351286 | 0.043431806 | 0.55286283  |
| 0.006617422 | 0.137647303 | 0.455838554 |
| 0.021663305 | 0.338611164 | 0.327293281 |
| 0.319291261 | 0.054660578 | 0.026765578 |
| 0.807247017 | 0.676480267 | 0.039526383 |
| 0.004504001 | 0.208528165 | 0.588669914 |
| 0.032882304 | 0.712065529 | 0.04281672  |
| 0.385297086 | 0.033585465 | 0.440469115 |
| 0.016399708 | 0.067299759 | 0.644042341 |
| 0.295675797 | 0.289600475 | 0.046319565 |
| 0.641544419 | 0.062577758 | 0.021182106 |

|             |             |             |
|-------------|-------------|-------------|
| 0.617316972 | 0.007089416 | 0.40107295  |
| 0.17673232  | 0.058060656 | 0.012675128 |
| 0.604056843 | 0.153355388 | 0.022946326 |
| 0.021538901 | 0.593095722 | 0.115963745 |
| 0.029022649 | 0.204760156 | 0.0079223   |
| 0.017171833 | 0.822503799 | 0.125574497 |
| 0.106030056 | 0.561034881 | 0.043649285 |
| 0.530270446 | 0.048871306 | 0.328710889 |
| 0.281565385 | 0.020733685 | 0.230966091 |
| 0.361227012 | 0.000403512 | 0.0043923   |
| 0.797058815 | 0.042660651 | 0.114574407 |
| 0.03356781  | 0.923212969 | 0.868601326 |
| 0.81511054  | 0.287269642 | 0.023371007 |
| 0.032187767 | 0.553283466 | 0.53683175  |
| 0.822487139 | 0.450308814 | 0.002842412 |
| 0.015105042 | 0.022564572 | 0.67722263  |
| 0.809643816 | 0.038544596 | 0.084080458 |
| 0.696388324 | 0.373039445 | 0.020496331 |
| 0.0357634   | 0.061109469 | 0.837711935 |
| 0.459173563 | 0.020571297 | 0.176570078 |
| 0.828014308 | 0.04970069  | 0.366010947 |
| 0.667221531 | 0.260890562 | 0.027265355 |
| 0.017240388 | 0.121787242 | 0.873766145 |
| 0.146872509 | 1.64E-08    | 0.020438407 |
| 0.45614006  | 0.036533283 | 0.153895905 |
| 0.88119214  | 0.204305421 | 0.01366951  |
| 0.37028017  | 0.001673336 | 0.221855545 |
| 0.005512364 | 0.349418977 | 0.0859253   |
| 0.158803516 | 0.00019194  | 0.003946086 |
| 0.611124364 | 0.020618914 | 0.518682229 |
| 0.036481322 | 0.490149684 | 0.028569709 |
| 0.008764042 | 0.976593793 | 0.100172658 |
| 0.85641546  | 0.040810748 | 0.193162065 |
| 0.716490288 | 0.309077823 | 0.025340197 |
| 0.610006033 | 0.001844192 | 0.010163297 |
| 0.968151434 | 0.527303236 | 0.018618879 |
| 0.548135656 | 0.307359444 | 0.021692278 |
| 0.002672298 | 0.939735019 | 0.042596199 |
| 0.135972147 | 0.564186333 | 0.003062054 |
| 0.039185527 | 0.007299304 | 0.779125526 |
| 0.089667211 | 0.051607325 | 1.99E-05    |
| 0.791364132 | 0.051423525 | 0.030321829 |
| 0.690734964 | 0.048522579 | 0.188377154 |
| 0.006656545 | 0.050565301 | 0.424134076 |
| 0.890570741 | 0.322361193 | 0.045992308 |
| 0.183402625 | 0.021937038 | 0.119897443 |
| 0.001691138 | 0.104500286 | 0.001367977 |

|                |             |             |
|----------------|-------------|-------------|
| 0.166525875    | 0.399231017 | 0.041897154 |
| 0.558055062    | 0.510157429 | 0.008808329 |
| 0.047383462    | 0.273000855 | 0.930848974 |
| 0.020194839    | 0.681819681 | 0.007162103 |
| 0.013628874    | 0.290202287 | 0.24778666  |
| 0.990023388    | 0.837541058 | 0.018263935 |
| 0.089539223    | 0.009540285 | 0.256644752 |
| 0.570036928    | 0.644844845 | 0.032473467 |
| 0.791836137    | 0.041597031 | 0.263022189 |
| 0.028839886    | 0.000792522 | 0.034233911 |
| 0.020292622    | 0.135426301 | 0.730169328 |
| 0.047463094    | 0.011284979 | 0.712920625 |
| 0.189777445    | 0.019526429 | 0.344275901 |
| 0.023005423    | 0.478576707 | 0.861045839 |
| 0.001102223    | 0.000420729 | 0.503849084 |
| 0.137983956    | 0.02460836  | 0.890834503 |
| 0.01150141     | 0.001248005 | 0.560196007 |
| 0.494494438    | 0.03713615  | 0.642501484 |
| 0.167713886    | 0.015189998 | 0.090213586 |
| 0.316638975    | 0.45521633  | 0.031121471 |
| 0.043203873    | 0.279734228 | 0.905105196 |
| 0.628269952    | 0.047248749 | 0.02934622  |
| 0.521973858    | 0.20111416  | 0.015199882 |
| 0.797147432    | 0.078018457 | 0.019429724 |
| 0.027251715    | 0.029732023 | 0.903101775 |
| 0.994704665    | 0.045415224 | 0.027073127 |
| 0.408487459    | 0.485189051 | 0.010459429 |
| 0.12746552     | 0.011919117 | 0.226068602 |
| 0.122428868    | 0.049718434 | 0.244109837 |
| 0.107434856    | 0.128958123 | 0.04351658  |
| 0.000117074 NA |             | 0.79279967  |
| 0.211025139    | 0.197442844 | 0.006120244 |
| 0.162242546    | 0.036612039 | 0.428909901 |
| 0.179179798    | 0.991138006 | 0.033323973 |
| 0.470034707    | 0.019112782 | 0.103617866 |
| 0.487388008    | 0.226054208 | 0.031796843 |
| 0.122475025    | 0.38714701  | 0.009441991 |
| 0.786179696    | 0.006261431 | 0.00102028  |
| 0.699526649    | 0.008964506 | 0.119023663 |
| 0.778541891    | 0.194277431 | 0.008746574 |
| 0.552142557    | 0.132497094 | 0.019592175 |
| 0.04349738     | 0.076749031 | 0.992269792 |
| 0.008876717    | 0.362660528 | 0.512684433 |
| 0.0714078      | 0.518725615 | 0.01664718  |
| 0.2736132      | 0.043223919 | 0.069770244 |
| 0.899784772    | 0.190713376 | 0.026878375 |
| 0.536003786    | 0.104230482 | 0.019051915 |



|             |             |             |
|-------------|-------------|-------------|
| 0.638515065 | 0.04028794  | 0.021285138 |
| 0.048847554 | 0.608159641 | 0.787029853 |
| 0.004443624 | 0.113315774 | 0.467074963 |
| 0.258783412 | 0.049330489 | 0.530096216 |
| 0.670272719 | 0.043684429 | 0.60894279  |
| 0.289131946 | 0.464986828 | 0.04203858  |
| 0.306858678 | 0.019544296 | 0.30131908  |
| 0.038734134 | 0.530494669 | 0.000835509 |
| 0.706035852 | 0.221950644 | 0.005195133 |
| 0.984075145 | 0.081424122 | 0.043869204 |
| 0.455476382 | 0.825403951 | 0.037942872 |
| 0.748836796 | 0.06500885  | 0.028136559 |
| 0.175120338 | 0.021019441 | 0.017520251 |
| 0.01965409  | 0.21192455  | 0.321019073 |
| 0.938218344 | 0.014801652 | 0.076663181 |
| 0.546101088 | 0.048665801 | 0.021048621 |
| 0.076177271 | 0.022034988 | 0.378194569 |
| 0.213331536 | 0.327993941 | 0.043976287 |
| 0.047481331 | 0.111924001 | 0.912151868 |
| 0.27865368  | 0.380882352 | 0.049340892 |
| 0.258906204 | 0.118311807 | 0.01760548  |
| 0.02942952  | 0.428577454 | 0.994304354 |
| 0.465416772 | 0.811944247 | 0.034070218 |
| 0.505561064 | 0.312950884 | 0.009778282 |
| 0.027632385 | 0.05761605  | 0.279390731 |
| 0.041075525 | 0.885525105 | 0.197729314 |
| 0.156933649 | 0.09630965  | 0.00175985  |
| 0.01593532  | 0.935608352 | 0.999823627 |
| 0.065604386 | 0.766204454 | 0.026065774 |
| 0.41861734  | 0.016269842 | 0.065279723 |
| 0.338459603 | 0.496870693 | 0.000874348 |
| 0.002894966 | 0.060066876 | 0.655170427 |
| 0.077672977 | 0.003358267 | 0.03923247  |
| 0.671117039 | 0.211534265 | 0.002108435 |
| 0.31803328  | 0.525300528 | 0.007633493 |
| 0.873331027 | 0.017691197 | 0.000227539 |
| 0.724638491 | 0.390748629 | 0.04254925  |
| 0.46847108  | 0.045747664 | 0.209964965 |
| 0.503643638 | 0.556764432 | 0.000777459 |
| 0.006517437 | 0.805730068 | 0.047753496 |
| 0.519396012 | 0.021209879 | 8.14E-08    |
| 0.038304203 | 0.341158787 | 0.147557107 |
| 0.534822383 | 0.476474303 | 0.001198077 |
| 0.114808698 | 0.012883461 | 0.838113563 |
| 0.539577674 | 0.023388204 | 0.045958562 |
| 0.305473364 | 0.554923984 | 0.013500896 |
| 0.016744505 | 0.382658275 | 0.803750208 |

|             |             |             |
|-------------|-------------|-------------|
| 0.294534993 | 0.139745949 | 0.013976988 |
| 0.701769568 | 0.13863222  | 0.004134784 |
| 0.44016302  | 0.02435139  | 0.068034101 |
| 0.873578772 | 0.012221047 | 0.020192128 |
| 0.467146201 | 0.076624273 | 0.042368799 |
| 0.556924866 | 0.247247416 | 0.005983715 |
| 0.20561917  | 0.025623039 | 0.9989026   |
| 0.694214636 | 0.726721573 | 0.016146083 |
| 0.722019299 | 0.033648925 | 0.020483787 |
| 0.466716572 | 0.430002753 | 0.001943131 |
| 0.07075246  | 0.667010366 | 0.039228626 |
| 0.035199161 | 0.446167709 | 0.037389536 |
| 0.039127998 | 0.307747094 | 0.42967005  |
| 0.193528465 | 0.005551781 | 0.537029457 |
| 0.563640696 | 0.822181482 | 0.034183731 |
| 0.133520491 | 0.07553191  | 0.000516462 |
| 0.339027327 | 0.00504196  | 0.000159254 |
| 0.151545393 | 0.018060467 | 0.634813462 |
| 0.35686306  | 0.154179198 | 0.037887065 |
| 0.306657744 | 0.010918115 | 0.360144306 |
| 0.470494605 | 0.288020128 | 0.025255246 |
| 0.52123406  | 0.921162486 | 0.039733928 |
| 0.735746162 | 0.103433178 | 0.033342111 |
| 0.702552858 | 0.325558114 | 0.024664862 |
| 0.02781298  | 0.442833306 | 0.721195035 |
| 0.898091145 | 0.112887135 | 0.000708364 |
| 0.990147304 | 0.233882348 | 0.026754096 |
| 0.900307131 | 0.069172353 | 0.012080958 |
| 0.859615687 | 0.031419437 | 0.071170774 |
| 0.210078383 | 0.059879582 | 0.024340966 |
| 0.696160828 | 0.097505302 | 0.011824358 |
| 0.203051972 | 0.017130803 | 0.441465488 |
| 0.002465099 | 0.027706764 | 0.298234457 |
| 0.990211655 | 0.003630369 | 1.38E-05    |
| 0.045236845 | 0.674272922 | 0.118782793 |
| 0.08331907  | 0.00585647  | 0.763732278 |
| 0.105737215 | 0.040909037 | 0.513001145 |
| 0.858623696 | 0.318165467 | 0.017933454 |
| 0.412128922 | 0.121717964 | 0.000284178 |
| 0.769145715 | 0.448477603 | 0.031930649 |
| 0.690679407 | 0.252862231 | 0.037949288 |
| 0.893347978 | 0.031365443 | 0.007856732 |
| 0.012631933 | 0.000649534 | 0.236227096 |
| 0.336093018 | 0.124484347 | 0.009321013 |
| 0.059595501 | 0.020479537 | 0.419537507 |
| 0.393348626 | 0.529734006 | 0.049720381 |
| 0.000699184 | 0.189994804 | 0.885328325 |

|             |             |             |
|-------------|-------------|-------------|
| 0.380924573 | 0.372237577 | 0.015783119 |
| 0.318830202 | 0.466079616 | 0.048037016 |
| 0.103998923 | 0.034989087 | 0.811965678 |
| 0.079083922 | 0.021102145 | 0.161381505 |
| 0.037623174 | 0.947495063 | 0.362069518 |
| 0.289948243 | 0.273657271 | 0.031813884 |
| 0.038819299 | 0.04717989  | 0.571775821 |
| 0.805817531 | 0.931048114 | 0.03575251  |
| 0.039733399 | 0.104619682 | 0.556612666 |
| 0.815295562 | 0.011808565 | 0.000197677 |
| 0.537772486 | 0.429174707 | 0.003693912 |
| 0.024433178 | 0.091364854 | 0.734425546 |
| 0.530238322 | 0.068182364 | 0.006273593 |
| 0.781285311 | 0.057338357 | 8.82E-05    |
| 0.899732699 | 0.109948413 | 0.003251148 |
| 0.840911253 | 0.088934429 | 0.014953581 |
| 0.820062717 | 0.375068789 | 0.037798121 |
| 0.186000402 | 0.039396514 | 0.717234195 |
| 0.692024938 | 0.022763037 | 0.023351745 |
| 0.09907039  | 0.900042737 | 0.022343782 |
| 0.495928028 | 0.718847914 | 0.00766898  |
| 0.002992311 | 0.022997253 | 0.061073044 |
| 0.872221332 | 0.149851538 | 0.00474993  |
